# Supplementary material
Source: Research Square preprint supplement (doi:10.21203/rs.3.rs-9338412/v1)
Supplement: Supplementary file 1 [file 0a612d12b3be207b6f6cc558.xlsx]

## Sheet: Dataset_1
Infromation of 10,000 randomly sampled compounds from 13M commercial library
SMILES	RiboBIND_score
Cc1ccc(C(=O)NCc2nnc3ccc(-c4ccc(F)cc4)nn23)c(C)c1	0.000202507
CC(C)c1cc(C(=O)N2CCCC2c2nc(N(C)C)ncc2-c2cccc(Cl)c2)[nH]n1	0.307957
NC(=O)N1c2ccccc2C=Cc2ccccc21	0.351178
CN(C(=O)c1ccc(F)cc1F)C1CCNC1	0.990564
COC1Cc2ccc(NCc3c(C)nn(C)c3C)cc2C1	0.79789
Cc1ccc(C2(C(=O)N3CCCOC(CN)C3)CCOCC2)cc1	0.664437
C#Cc1ccc(CC(=O)NCC2(n3cccn3)CCN(C(=O)C=C)CC2)cc1	5.93202e-05
O=C1NC(=S)N(c2cccc(Cl)c2)C(=O)/C1=C\c1c2ccccc2cc2ccccc12	0.964053
COCc1ccc(C(=O)OC2CCN(CCOc3cccc(Br)c3)CC2)o1	0.984757
CC(NS(=O)(=O)c1cccs1)c1ccccc1	0.000675068
COC1(OC)CCN(C(=O)c2cnc(C(C)(C)C)s2)CC1O	0.795211
CCN(C(=O)CNCCOC)C(C)c1cccc(C(F)(F)F)c1	7.67657e-05
O=c1n(CCSc2nnc(-c3ccc(Cl)cc3)[nH]2)nc2ccccn12	0.0486595
CCCCN(CC)CCCNC(=O)C1CCCN(C(=O)c2cc3n(n2)CC(c2ccc4c(c2)OCCO4)OC3)C1	0.831506
Cc1cc(N2CCCN(Cc3ccccc3)CCOCC2)nc(C)n1	0.99675
CC(=O)N1CCN(C(=O)C(=O)Nc2cccc(N3CCCS3(=O)=O)c2)CC1	0.00668711
NC1CCC(NC(=O)CCc2cccc(OC3CCCC3)c2)CC1	0.745587
N=C(N)C1CCNCC1	0.982135
COC(=O)c1cccc(C(=O)Nc2nc(-c3ccc4c(c3)CCCC4)cs2)n1	0.087497
O=C(c1cc2ccccc2[nH]1)N1CCN(c2nc3ccccc3nc2N2CCCC2)CC1	0.998866
O=C(Nc1cccc(NS(=O)(=O)c2ccc(N3CCCS3(=O)=O)cc2)c1)C1CC1	0.0697526
O=C(NCCn1cc([N+](=O)[O-])cn1)NC1CCc2ccc(F)cc21	2.75913e-05
O=C(CCN1CCCCCC1=O)NCC1CCCOC1	0.776949
COc1ccc(/C([O-])=C2\C(=O)C(=O)N(CCC[NH+](C)C)C2c2cccc([N+](=O)[O-])c2)cc1OC	0.995764
O=C(O)C1C2C=CC(C2)C1C(=O)N(Cc1ccccc1)Cc1ccccc1	0.000296552
CCc1onc(C)c1C1CCCN1C(=O)Nc1ccc(Br)cc1	0.000496533
CC(=O)N1CC2=Nc3cccc4c3c(cn4CCC(C)C)C(c3ccc(C(F)(F)F)cc3)C2=C1O	0.00507716
O=C(COc1ccccc1)N1CCCC(Cc2ccccn2)C1	0.987453
CC(C)(CCC(=O)O)NC(=O)Cc1ccc(Cl)c(Cl)c1	0.000129797
Brc1ccc(-n2cc(-c3cnn(C4CCNCC4)c3)nn2)nc1	0.990601
COc1ccc(OC)c(C2=NOC(C(=O)N3CCCCCC3)C2)c1	0.245791
O=C(NC1CCN(c2nccc3occc23)CC1)C1CC1	0.489139
Cc1ccc(-c2nc(NC(=O)CC3CNCCO3)sc2C)s1	0.993368
COC(=O)c1ccnc(Nc2cccc(F)c2)c1	0.00031073
O=C(/C=C/c1ccc(Cl)cc1)c1ccc2c(c1)OCO2	0.874367
COc1ccc(C(C)=NNC(=O)c2cc(C3CC3)nc3ccccc23)cc1	0.998788
CC(C)(C)c1noc(-c2cc3n(n2)CC(c2ccc4c(c2)OCO4)OC3)n1	0.750464
N#CC(C#N)=C1C(=O)N(CCN2CCCCC2)c2ccccc21	0.747398
CCOC(=O)c1ccc2c(c1)nc(COc1cc(C)ccc1C(C)C)n2CC	0.047655
Cc1coc(C)c1C(=O)Nc1ccccc1C#N	1.54952e-05
CC1(C)CC(=O)C2=C(C1)N(CC1CCCO1)C(=O)C2(NC(=O)c1ccc(F)cc1)C(F)(F)F	0.0156836
CC1(C)CC(NS(=O)(=O)c2ccc(Cl)cc2)c2cc(N)ccc2O1	0.0655035
COc1ccccc1Cc1nccc(C2(c3ccccc3Cl)CCNCC2)n1	0.962779
CC(CN)(NC(=O)c1cc(Br)ccc1F)C1CC1	0.121651
CCOC(=O)CCCCCC(=O)c1cccc(CN2CCC2)c1	0.765589
Cc1n[nH]c2c1CCCN2CC(=O)N1CCc2ccccc21	0.107019
O=C(NC(CCn1cncn1)c1ccccc1)c1cn(Cc2cccc3ccccc23)nn1	0.00812495
C=CCN(C#N)c1ccc(F)c(C#N)c1	8.80016e-05
O=C1CO[C@H]2CN(Cc3ccncc3)C[C@H]2N1Cc1ccc(F)cc1	0.15007
Cc1[nH]c(=S)c(C#N)c(-c2ccc(Br)cc2)c1C(=O)Nc1ccccc1	0.0273069
Cc1cc(C=NNC(=O)c2cccc([N+](=O)[O-])c2)c(C)n1CC(C)C	0.966934
Cc1csc(SCc2ccc(C(=O)NC(c3ccc(F)cc3)c3nccn3C)cc2)n1	0.159017
Cn1ncc(I)c1C1CC1	5.76639e-06
Cc1cc(C)n(-c2nc3cc(C(=O)c4ccccc4)ccc3nc2Cl)n1	0.992062
OC1=CC2(CCC1)Oc1ccc(Br)cc1C1CC(c3ccc4ccccc4c3)=NN12	0.755027
Cn1cc(CCC(=O)N2CC[C@H]3NCCCC[C@H]32)c2ccccc21	0.971378
CCc1cccc(N2C(=O)CSC2c2cccc(NC(=O)COc3ccc(Cl)cc3)c2)c1	0.0596986
O=C(CCc1ccc2ccccc2c1)N1CCOC2(CCNCC2)C1	0.988145
CN1CCN(C2CCN(C(=O)Cc3cccnc3)C2)CC1	0.981
Cc1c[nH]nc1C(=O)N[C@H]1C[C@@H](CNc2nc3ccccc3o2)C1	0.785629
Cn1cc(C(=O)NCc2nc(C3CCCCC3)no2)c(=O)[nH]c1=O	0.548484
Cc1cnc(CNCc2cc(F)ccc2Br)s1	0.997023
Cn1c(=O)c2ccc(C(=O)Nc3cc(Cl)ccc3N3CCCC3)nc2n(C)c1=O	0.961279
OC1CCc2cnn(CC3CCCCCC3)c2C1	0.608049
Cc1c(C(=O)C2=C(O)C(=O)N(CCN3CCOCC3)C2c2ccc(C(C)C)cc2)sc2nc3ccccc3n12	0.316564
CN1CCCN(C[C@@H]2OCCN(C(=O)c3ccco3)[C@H]2c2cnn(C)c2)CC1	0.926471
FC(F)(F)c1cc(Cl)ccc1N1CCNCC1	0.589266
CC(=O)N1CCc2c(sc(NC(=O)c3cc(-c4ccccc4)nc4ccccc34)c2C(N)=O)C1	0.0450493
O=C(Cc1ccc(NC2=NC3CS(=O)(=O)CC3S2)cc1)NCC1CCN(C2CCCC2)C1	0.00422099
CNC(=O)Cn1cc(NC(=O)N[C@H]2c3ccccc3C[C@@H]2O)cn1	0.000230272
Cc1cccc(NC(=O)CN2C(=O)NC3(CCCCC3)C2=O)c1	0.000664279
O=c1c(-c2c3oc4cc(O)ccc4c3nc3c2c(O)nn3C2CCCCC2)cc2cccc3c2n1CC3	0.432808
O=C1OC(N2C(=O)CC[C@H]2C(=O)ON2C(=O)CCC2=O)c2ccccc21	0.110302
COc1ccc2[nH]cc(CCNC(=C3C(=O)NC(=O)N(c4ccccc4C(F)(F)F)C3=O)c3ccc(C)cc3)c2c1	0.960532
O=C(O)[C@H]1CCCN(C(=O)c2ncoc2-c2ccc(F)cc2)C1	0.960656
O=C1C=CC(=O)N1C1CCNCC1	0.882448
O=C(c1ccc(Cn2ccnc2)o1)N1CCCC1c1nc(-c2ccccc2F)c[nH]1	0.00283031
CC1CCCN(c2cc(C(=O)NC(CO)c3nncn3C)ccn2)C1	0.131722
COc1ccc(CC(=O)N2CC[C@@H](CC(=O)O)[C@@H](CCN(C)c3ccccc3)C2)cc1	0.796626
Cc1ccc2sc(N(Cc3cccnc3)C(=O)C3=COCCO3)nc2c1C	0.96815
Cc1ccc(CN2CC(C(=O)N[C@@H]3C[C@H]3CF)CC2=O)cc1	1.63688e-05
C#CCn1cc(CN(C)Cc2cnc3nc(C)cc(C)n23)cn1	0.99193
COc1ccccc1C(=O)NC(Cc1ccccc1)c1nnc(N2CCCC2)o1	0.000132401
COC(=O)c1ccccc1NC(=O)CCNC(=O)c1cccc(C)c1	0.000870773
Cc1cc(CNc2nc3c(cc2C#N)COCC3)ccn1	0.957386
CN(C)c1cc(-c2ccncc2)c(-c2ccc3ccccc3c2)nn1	0.971849
COc1ccccc1C1CC(c2ccc(C)cc2C)=NN1C(=O)CN1CCc2ccccc2C1	0.464315
CCC(C)c1ccc(-c2csc(NC(=O)c3nc(N4CCOCC4)ncc3Cl)n2)cc1	0.0225493
Cc1ccc(NC(=S)NC(=O)c2cncc(Br)c2)c(C)c1	0.711411
O=C(CCc1nc(-c2ccccc2)no1)Oc1ccc2ccccc2c1Br	0.977999
Cc1cc(CN2CCCC(COc3nccs3)C2)no1	0.99812
CC1(C)C2CC=C(CN(CCO)CCO)C1C2	0.207681
COC(=O)COc1ccc(C=C2Oc3cc(OC)ccc3C2=O)cc1	0.995065
O=C(Cc1ccc(F)cc1)N1CCN(Cc2ccccc2)c2ncccc21	0.836886
c1ccc(-c2nnc(-c3ccccc3)s2)cc1	0.961552
COc1cccc(CNC(C)C(C)c2ccccc2)c1OC	0.994793
Cc1cc(NC(=O)c2cccc(F)c2Cl)n(-c2ccccc2)n1	0.00276512
Cc1ccc(OCC(=O)N2CCCC(c3nc4ccccc4s3)C2)c(Br)c1	0.998366
CCOc1ccc(NC(=S)N/N=C(\C)c2cc3cccc(OCC)c3o2)cc1	0.942705
CC(C)CN(CC(N)=O)c1ccc([N+](=O)[O-])cc1C#N	0.00264135
Cc1ccccc1OCCOc1ccc(C2C(C(=O)c3ccc(F)cc3)=C(O)C(=O)N2CCN(C)C)cc1	0.995857
CC1CNCCN1C(=O)c1cccc(OC2CCCC2)c1	0.884458
CC1CCCCN1C(=O)CSc1nnc2c(Cl)cc(Cl)cn12	0.0181092
Cn1c(=O)c2c(SCc3nc4ccccc4c(=O)n3CC(N)=O)nc(C(C)(C)C)nc2n(C)c1=O	0.984669
CCc1ccc(S(=O)(=O)Nc2ccccc2C(C)=O)cc1	0.000851321
COc1ccc(F)cc1C(=O)CN1C(=O)NC2(CCCCCCC2)C1=O	1.71205e-05
O=c1c(Br)cc(C(F)(F)F)cn1Cc1cocn1	0.471304
CN(CC(=O)NCc1ccco1)Cc1nnc(-c2ccccc2)o1	0.466656
N#CC(=Cc1ccc(OCc2ccccc2F)cc1)C(=O)Nc1nc(-c2ccccc2)cs1	0.89541
NCC12CCC1CCCN2C(=O)CC1NC(=O)c2ccccc21	0.00224002
Clc1nc2cc(Br)c(Br)cc2nc1Cl	0.806387
CC(C)(C)c1csc(CNc2ccc(S(C)(=O)=O)cn2)n1	0.279305
CC(NC(=O)c1cnc(C2CCCO2)s1)c1ccc(OCC(=O)O)cc1	0.000246624
Cc1cc(C)c(C(=O)N(Cc2c(C)nn(C)c2C)C2CC2)c(O)n1	0.951586
CCOC(=O)c1cc(F)c(F)cc1NC(=O)N1CCCC(C(=O)O)C1	0.00376278
O=C(Cc1ccc(Cl)cc1)NCC(=O)N1CCCC1	3.0122e-05
COc1ccc(NC(=O)N2C[C@@H](F)C[C@H]2C(=O)N2CCc3ccccc3C2)cc1OC	0.00037484
CC(C)C[C@H](NC(=O)[C@@H]1CCCN1C(=O)OCc1ccccc1)C(=O)NCC(N)=O	4.21904e-05
C[C@]12C[C@@H](Cc3ccccc3)N(C(=O)C3CCOCC3)[C@H]1CCCCCN2	0.866602
CC(C)c1noc(-c2cccn3c(CNC(=O)c4ccccn4)nnc23)n1	0.930914
Cc1sc(C(=O)O)cc1S(=O)(=O)N1c2ccccc2CC1C	0.000168655
CN1C(=O)CC[C@@H](NC(=O)c2cc[nH]c2C2CC2)[C@@H]1c1ccnn1C	0.000651058
CCC(C)C(NC(=O)CCC(=O)OCC(=O)[C@@]1(OC(C)=O)CCC2C3CCC4=CC(=O)CC[C@]4(C)C3CC[C@@]21C)C(=O)O	0.00290838
COc1ccc(-c2ccnc(NC(=O)c3cc(C)ccc3C)n2)cc1	0.00537765
CN(C)CCOCc1cncc2c1CCN(C(=O)c1ccco1)C2	0.99036
O=C(ON=C1CCCc2ccccc21)c1cccc(Cl)c1	0.687187
O=Cc1cn(Cc2ccc(C(=O)O)o2)c2ccccc12	0.0496799
CS(=O)(=O)N1CCN(c2ccnc(C(=O)O)n2)CC1	0.000894543
CCN1C(=O)/C(=C/c2cc(Br)c(OCc3cccc(F)c3)c(OC)c2)SC1=S	0.984668
CN1C(=O)CC(N2CCN(c3ccccn3)CC2)C1=O	0.889325
CCCn1nc(C(=O)Nc2ccc(N(C)C)nc2)ccc1=O	0.48068
Cc1nn2c([nH]c(=O)c3ccccc32)c1CN1CCN(c2cccc(Cl)n2)CC1	0.552147
Cc1cccc(-n2nnc(C(=O)NCCNC(=O)c3nnn(-c4cccc(C)c4)c3N)c2N)c1	0.976743
CCOc1cc(CN2CCC(C(=O)NC3CCCCCC3)CC2)ccc1O	0.953665
O=C1NC(=O)C(=CNCc2ccc(Cl)cc2)C(=O)N1	0.998088
CC(COc1cnc(F)nc1)C1CCCC1	0.0644839
CCOC(=O)CC1=CC(=O)N(CC(=O)Nc2ccc(OC)c(Cl)c2)c2ccccc2N1	0.000449748
Cc1ccc(-c2ccc(OC3CCOC3)cc2)nc1C(=O)O	0.0265126
COc1ccc(CNC(C)C)cc1Cl	0.0102666
O=c1c2cc(Br)ccc2oc2ccc([N+](=O)[O-])cc12	0.816965
CCOC(=O)c1ccc(C(=O)C(C)(C)OC(C)=O)o1	0.221307
COc1ccc(NC(=O)N2CCCC2C(=O)NCc2ccc(C)cc2)cc1	4.16737e-05
CCCC(N)C(=O)NCc1cccc(CN2CCOC(C)C2)c1	0.81815
CCC(C)(CCO)NC(=O)c1nnc2ccc(Br)cn12	0.0121339
O=C(c1ccccn1)c1cc2ccccc2n1S(=O)(=O)c1ccccc1	0.919977
CN(C(=O)c1ccc(Oc2ccccc2)cc1)C1CCS(=O)(=O)C1	0.0014267
Cc1nn2c(O)cc(Cn3cccn3)nc2c1-c1ccccc1	0.0123725
O=C(NCCN1CCOCC1)c1ccc(N2CCCN(Cc3ccc(F)cc3)C2=O)cc1	0.0554499
CCC(C(=O)NCCOc1ccc(-c2ccc(OC)cc2)nn1)c1ccccc1	0.835743
CCCOc1ccc(C2Cn3nc(C(=O)N(CCCOC(C)C)Cc4ccco4)cc3CO2)cc1	0.614007
O=C(O)c1ccccc1-c1ccc(CN2CCOC(c3ccccn3)C2)o1	0.855219
CON(C)S(=O)(=O)c1ccc(C(=O)N2CCC(C)(C(=O)O)CC2)cc1	0.0766908
Cc1ccc(CN(C)C(=O)[C@@H]2CCCN2Cc2ccccc2)cc1C	2.65435e-05
COc1ccc(CCC(=O)N(CCc2ccccc2)CC(=O)O)cc1OC	0.00901872
O=C(Cc1cccc(F)c1F)Nc1ccc(Oc2cccc(F)c2F)nc1	0.597707
CCCCCCN1C(=O)/C(=C/c2c(N3CCN(CC)CC3)nc3ccccn3c2=O)SC1=S	0.996293
Cc1nc(C)c(C(=O)NCc2nc3c(F)cccc3[nH]2)nc1C	0.986078
C(=Cc1nnc(CCc2ccccc2)o1)c1ccccc1	0.992389
Cc1ccc(-c2ocnc2C(=O)NCc2nnc3n2CCC3)cc1	0.921625
Cc1[nH]c2c(C(=O)NC3CCCN(C(=O)c4ccco4)C3)cccc2c1C	0.794806
CC(=O)Nc1ccc(C(=O)OCc2nnc(Cc3ccccc3Br)[nH]2)cc1	0.989817
CC1=CC(C)C2(COCOC2)C(C)C1	0.558749
O=C(NCC1(N2CCCCC2)CCOCC1)c1ccoc1C1CC1	0.0215209
CC1(C)CC[C@]2(C(=O)O)CC[C@]3(C)C(=CC[C@@H]4[C@@]5(C)C[C@@H](O)[C@H](OC(=O)/C=C\c6ccc(O)cc6)C(C)(C)[C@@H]5CC[C@]43C)[C@@H]2C1	0.00800948
CC(C)n1ncc2cc(NC3CCN(S(C)(=O)=O)CC3)ccc21	0.0113432
C[N+](C)(C)C(Cc1ccccc1)C(=O)[O-]	0.376114
CCOC(=O)C(CC)n1ccn(-c2ccc(Br)cc2)c(=O)c1=O	0.0052333
COc1cc(C(=O)NC2(C#N)CC2)cc(Cl)c1O	0.000936683
Cc1cc(C(=O)Nc2ccc3[nH]c(C)cc3c2)c2c(C)noc2n1	0.973673
COc1ccc(-c2nc3ccccc3s2)cc1NC(=O)c1cccc(C)c1	0.992563
c1sc(C2CCNCC2)nc1C1CCCC1	0.959466
O=C1CC(c2cccs2)CC2=C1C(c1cccc(O)c1)Nc1ccccc1N2	0.769847
CC1CN(c2ccc(CNC(=O)c3ccn4ccnc4c3)cn2)CCO1	0.922985
COc1cc(CNc2cnn(CCN3CCOCC3)c2)c2c(c1)CC(C)O2	0.995502
CC(C)(C)C(=O)N1C[C@@H]2c3nc(NCC4CC4)ncc3CS(=O)(=O)[C@@H]2C1	1.25387e-05
CC(C)CCn1c(=O)c2ccccc2n2c(=S)n(CN(C)Cc3cnn(-c4ccccc4)c3)nc12	0.12671
COCC(N)C(=O)N1CCN(C(=O)c2cc3ccccc3[nH]2)CC1	0.970035
CCN(CC(=O)NCc1ccccc1Cl)CC(=O)Nc1c(F)cccc1F	0.000812526
COC(=O)c1cc(Cc2ccc(NC(C)=O)c(C(=O)OC)c2)ccc1NC(C)=O	0.00100708
CCOc1ccc(NC(=O)[C@@H]2CCC(=O)N2C2OC(=O)c3ccccc32)cc1	0.000811889
N#Cc1ccc(N2C3CC2CN(Cc2ccc(C(F)(F)F)nc2)C3)cn1	0.269839
O=C(O)c1cc(C(F)F)ccn1	0.00010236
CN(Cc1cccc(Cl)c1Cl)C(=O)CC1CSCCN1	0.012759
CC1=NS(=O)(=O)N(C)C=C1C(=O)N1CCCCC1c1nc(C)no1	0.000155711
O=S(=O)(CC1COc2ccccc2O1)N1CCOCC(F)(F)C1	0.00190423
CC(C)C(NC(=O)C1CCCN(c2ccc(Cl)nn2)C1)c1ccccc1	0.00581607
Nc1cncc(-c2ccc(C(=O)NCCCN3CCNC(=O)C3)cc2)c1	0.737783
Cc1nc2nc(N3CCCC(NC(=O)c4cnn(C)c4)C3)ccc2c(C)c1Br	0.992452
C[C@@]12CCC[C@H]1[C@@H]1CC=C3C[C@@H](OC(=O)CCCCC(=O)O)CC[C@]3(C)[C@H]1CC2	0.00706593
O=C(O)c1csc(CNC(=O)c2cn3ccccc3n2)n1	0.587085
COc1ccc(Cl)cc1C(=O)N/C(=C\c1cccc([N+](=O)[O-])c1)C(=O)Nc1ccc(Cl)cc1Cl	0.741538
O=S(=O)(NC1CCC1)c1cccc(Cl)c1	0.000106623
COCCOc1ccc(S(=O)(=O)N2CCN(C3CCNC3)CC2)cc1	0.926302
CNC(=O)C1CN(C)CCN1C(=O)CCn1ccc(C)n1	0.866646
O=C(COc1ccc([N+](=O)[O-])cc1Br)NN=Cc1ccc(OC(=O)c2ccco2)cc1	0.997732
COC(=O)CCCCC(=O)Nc1cccc(F)c1F	0.000344103
COCC1(C(=O)Nc2nc(-c3c[nH]c(C(N)=O)c3)cs2)CCNCC1	0.987822
CC(=O)N1CCN(c2ncccc2CNCC2CC=CCC2)CC1	0.997535
COc1ccc(C(=O)N2c3cc(CNC(=O)CSCc4ccc(F)cc4)ccc3CC2C)cc1	0.323787
CCc1cc(C(=O)NCc2ccccc2OC)nc2cc(-c3ccsc3)nn12	2.71607e-05
CCCCNc1ccccc1C(=O)OCC(=O)Nc1ccc2c(c1)OCO2	0.0760954
CC(Br)C1CN(C(=O)OC(C)(C)C)C1	0.0021243
O=C1c2ccc([N+](=O)[O-])c3c([N+](=O)[O-])ccc(c23)C(=O)N1c1ccc(I)cc1	0.994061
CCN(c1ccccc1)S(=O)(=O)c1ccc(C(=O)Nc2sccc2C(N)=O)cc1	0.00159708
O=C(Cc1c(Cl)cccc1Cl)NCCNC(=O)c1c(F)cccc1F	0.0438857
CC(CN)CNC(=O)C(C)Cc1ccc(C(F)(F)F)cc1	0.00192619
O=C(c1cccs1)C(O)NS(=O)(=O)c1ccccc1	0.0116596
Cc1ccc(CC(=O)NC(CO)c2ncc[nH]2)cc1	0.00100225
N#CC(=Cc1ccc(N2CCOCC2)c([N+](=O)[O-])c1)C(=O)Nc1cc2c(cc1[N+](=O)[O-])OCCO2	0.939747
CCOC(=O)c1cc2c(=O)n3ccccc3nc2n(Cc2ccco2)c1=NC(=O)COc1ccc(Cl)cc1Cl	0.955984
CC1CCc2c(sc(NC(=O)c3cnn4c(C(F)(F)F)cc(-c5ccccc5)nc34)c2C#N)C1	0.000167561
O=C(NCc1ccc(-c2nc3ccccc3o2)cc1)c1ccccc1F	0.979734
CCOC(=O)c1c(N2C(=O)Nc3ccccc3N2O)n[nH]c1-c1ccc(Cl)cc1	0.0107846
COc1ccccc1CNc1nc2c(-c3cccc(C(F)(F)F)c3)nnn2c2ccccc12	0.0303266
CC1(C)CN(C(=O)NC2COCc3ccccc32)CC(C)(C)O1	0.000269444
COc1ccc(CC(=O)/N=C2/SC3CS(=O)(=O)CC3N2C)cc1OC	0.000745281
O=C1C(=Cc2ccc(Cl)c(Cl)c2)Oc2cc(OS(=O)(=O)c3ccccc3)ccc21	0.800407
Cc1ccn(Cc2cc(-c3ccccc3Cl)no2)c(=O)c1C(=O)O	0.00197133
Cc1ccc(Nc2ncnc3c2nnn3Cc2ccccc2)cc1	0.492578
C/N=C1/SC(CC(=O)Nc2sc3c(c2C(=O)OC)CCCC3)C(=O)N1C	0.000771707
O=C(Nc1cccc(C(=O)N2CCC(C(=O)NCc3ccccc3)CC2)c1)c1ccc(Cl)cc1	0.846724
CCCn1c(=O)n(CCC(=O)NC2CCC(N)CC2)c2ccccc21	0.892828
CC(Nc1ccc(N2C[C@@H](C)O[C@@H](C)C2)cc1)c1cnn(C)n1	0.985366
CC(Sc1nnnn1-c1ccc(O)cc1)c1cccc2ccccc12	0.836032
CCOC(=O)CNC(=O)C1CCCCN1C(=O)OC(C)(C)C	7.17087e-05
C=C(C)C(=O)OC1C2C(CC(C)C3OC3C(=O)C(C)(O)C1OC(C)=O)OC(=O)C2CC1CC(O)C(C)=CC(O)C2C(CC1=C)OC(=O)C2C	0.745931
Cc1cccc(C)c1OCCCOc1ccccc1/C=C1/C(=N)N2C=CSC2=NC1=O	0.99347
CC(C)c1noc(C(C)NC(=O)C(=O)c2cccn2C)n1	0.548802
C=C(Cl)CN1CCN(CC(F)(F)C(F)F)CC1	0.921907
CN(Cc1ccccc1)C1CCOC2(CCN(C(=O)COc3ccccc3)CC2)C1	0.79604
COC(=O)c1cccc(NC(=O)c2ccc3c(c2)C(=O)N(C)C3=O)c1	0.00535673
CC(C)S(=O)(=O)Nc1ccccc1C(F)(F)F	2.31339e-05
C=CCc1ccccc1OCCOc1ccc(/C=C2/C(=N)N3N=C(S(C)(=O)=O)SC3=NC2=O)cc1Cl	0.665725
O=C(NCCC(c1ccccc1)c1ccccc1)C1=COCCO1	0.114724
COc1ccc(NC(=S)Nc2ccc3c(c2)CCC3)cc1OC	0.993477
COc1ccccc1C(=O)Nc1ccc(N2CCN(C(=O)c3ccc(Cl)cc3)CC2)cc1	0.478904
Cc1ccc(C(C)C)c(OCc2nc3ccccc3n2Cc2ccc(F)cc2)c1	0.871966
Cc1cn[nH]c1C1CCN(C(=O)c2cc(C(C)C)no2)C1	0.875975
Cc1nn(CC(C)c2cc(O)n3ncc(-c4ccc(F)cc4)c3n2)c(C)c1C	0.180519
CN(C)C(=O)C(Cc1ccccc1)Nc1ccc2nnnn2n1	0.00089413
COc1ccc(-c2nc(C(=O)N(C)C(C)C(=O)O)cs2)cc1	0.247131
Cn1cnc([C@@H]2CN(C(=O)c3cccc4c3C(=O)CC4)C[C@H]2C(=O)NC2CC2)c1	0.169794
Nc1nc(=O)[nH]c(NCc2ccccc2)c1N	0.867654
COc1ccc2cc(CNc3ccc(C)cc3)c(=O)n(CC(=O)Nc3ccc(C(C)=O)cc3)c2c1	0.99006
CC(C)(C)c1ncc(NC(=O)NCCc2nc3c(s2)CCCC3)cn1	0.98659
CCn1cc(NC(C)c2nc(Br)cs2)cn1	0.989251
CC(OCC1CC1)C(=O)NCC(O)CNc1ncnc2scnc12	0.0608871
Oc1ccc2c(Cc3ccc(Cl)cc3)noc2c1	0.427451
CCCn1c(CCc2ccc(NS(=O)(=O)c3cccc(Cl)c3C)cc2)nc2ccccc21	0.168334
CN(Cc1cc(F)cc(F)c1)C(=O)c1ccc(F)c(C#N)c1	1.4e-05
CCN(CC)C(=O)c1sc(NC(=O)c2cccs2)c(C(=O)OC)c1C	0.000138204
C=CCN1N=C(C)Cn2c1nc1c2c(=O)n(C/C=C/C)c(=O)n1C	0.886657
COCCN1Cc2ccccc2C2(CCN(C(=O)c3csnn3)CC2)C1	0.859745
Cc1ccccc1C(=O)NC(NC(=S)Nc1cccc(O)c1)C(Cl)(Cl)Cl	0.229802
Cc1cc(C(=O)NC(C)CC(C)O)ccc1O	0.441705
CCc1nc(CN2CCN3C(=O)OCC3(CC)C2)cs1	0.901316
CN1CCC(CN(C)C(=O)c2c[nH]c3ccccc3c2=O)CC1	0.99794
CC(=O)NC[C@H]1[C@H]2C[C@H](CN(Cc3cscn3)C2)[C@@H]2CCCC(=O)N21	0.985
OCCN1CCN(Cc2noc(-c3cccs3)n2)CC1	0.96464
C=CCN1C(=O)C(=Cc2ccc(OCc3ccccc3C)cc2)SC1=S	0.93714
CC(C)(C)n1ncc(C(=O)NCCC(=O)O)c1C(F)(F)F	4.3272e-05
CC(C)N(C)Cc1nnnn1CC(=O)N(C)Cc1ccc(F)cc1	0.188345
CCCc1nc2cccnc2n1C1CCN(S(=O)(=O)c2cnn(CC)c2)C1	0.215859
O=C(N/N=C/c1ccc(-c2cc(Cl)c(Cl)cc2Cl)o1)c1ccccc1O	0.975503
CC(C)c1nc(CCNC(=O)CCc2cn[nH]c2)no1	0.278247
O=S(=O)(c1ccc(F)cc1)N1CCCN(CC2CCCNC2)CC1	0.965107
Cc1nc(N2CCCCC2)cc(N2CCN(S(=O)(=O)c3cc(C(C)C)ccc3C)CC2)n1	0.307137
COCCCNC(=O)c1ccc2[nH]cc3c(=O)n(-c4ccc(F)cc4)nc-3c2c1	0.419134
O=C(CCCCC1CCSS1)Nc1cccc(-c2nnc[nH]2)c1	0.797368
CC1=C(C(=O)OCc2ccc3c(c2)OCO3)C(c2ccc(N(C)C)cc2)NC(=O)N1	0.904738
C[C@H]1C(=O)N(Cc2ccc(C(F)(F)F)cc2F)[C@@H](C)C(=O)N1C	0.000103232
Cc1ccc(N2CCN(C(=O)c3cccc4cccnc34)CC2)cc1	0.943059
CC1CCN(c2nc(N(C)Cc3ccccc3)nc3c2CN(C(=O)c2ccccc2F)CC3)CC1	0.00153095
O=C1CC2(C(=O)Nc3c(Cl)cccc32)c2sc(C(=O)O)c(-c3ccccc3)c2N1	0.000144407
Cc1cc(-c2csc(NC(=O)Cn3cnc4c3c(=O)n(C)c(=O)n4C)n2)c(C)n1-c1ccccc1	0.646339
CCOc1ccc(CCNC(=O)CSc2nncc3c2[nH]c2ccc(F)cc23)cc1OCC	0.0295385
Cc1nn(-c2cccc(Cl)c2)nc1C(=O)N1CCCCC1C(N)=O	0.000695705
O=C(O)C1CC=CCC1C(=O)Nc1cc(C(F)(F)F)ccc1-n1cccn1	0.000254078
Cc1nc(Cc2ccccc2)sc1C(=O)NC1CCCNC1	0.988477
Cc1cc(I)cc(-c2nc(C3CCOCC3)nn2C(C)C2CC2)c1	0.00504946
COC(=O)c1ccc(C(=O)Nc2ccc(OC)c(C(=O)O)c2)o1	0.0886551
NCCC(=O)NCC1CCCCN1Cc1ccc(OCc2cccc(F)c2)cc1	0.996919
COCCN1C(=C2C=CC(=NC(C)=O)C=C2)Nc2c1c(=O)[nH]c(=O)n2CC(C)C	0.84422
CC/N=C1\S/C(=C\c2ccc(Sc3ccc(Cl)cc3)o2)C(=O)N1CC	0.994467
CCOc1ccc(C(=O)Oc2ccc(/C=N/NC(=O)c3ccccc3NS(=O)(=O)c3ccc(Cl)cc3)cc2OCC)cc1	0.935918
CC(=O)OC[C@H]1O[C@@H](n2c(Br)nc3c(N)ncnc32)[C@H](OC(C)=O)[C@@H]1OC(C)=O	0.970821
O=C(N[C@@H]1CCOC[C@H]1OCc1cscn1)c1ccccc1-n1cccn1	0.908479
CC(C)Cc1noc(COc2ccc(N=S3(=O)CCCC3)cc2)n1	0.807185
Cc1c(S(N)(=O)=O)cnc(Cl)c1Br	5.51016e-06
CCOc1ccc(NCC(=O)N(C)Cc2cnn(C)c2)cc1Cl	0.0121621
COc1ccc(C=NNc2ccccc2)cc1Cn1nc(C)c([N+](=O)[O-])c1C	0.976001
O=S(=O)(NCCc1cccc(Cl)c1Cl)c1cc(Cl)ccc1Cl	0.138249
COc1cc(-c2nc3cc(F)c(F)cc3c(=O)[nH]2)ccc1F	1.01184e-05
C(=NN=c1[nH]c2ccccc2[nH]1)c1cccc2cccnc12	0.993513
Cc1ccc(C)c(NC(=O)N(C)Cc2nc3cc(C(=O)N(C)C)ccc3n2C)c1	0.176845
CCc1cnc(CNc2ncc(Br)cc2C#N)s1	0.889109
COc1ccc(Cl)cc1NC(=O)Cn1c(=O)n(-c2cccc(C)c2)c(=O)c2sccc21	7.94051e-05
O=c1[nH]c2ccccc2c(=O)n1-c1ccc(Cl)cc1Cl	0.184065
CCCn1c(C)nnc1COC(=O)c1cc(Cl)c(Cl)[nH]1	0.018802
COCCc1cc(NC(=O)N2CCCC(c3cc(F)ccc3F)C2)n(C)n1	0.00412814
CC(=O)Nc1cc(C)nc(C)c1OC(C)=O	0.983725
CCOc1ccccc1N(C)C(=O)Cn1ccc(=O)[nH]c1=O	0.00101529
Cn1ccnc1C(=O)N1CCC(C2CCN(Cc3cccc(Cl)c3)CC2)CC1	0.974893
O=C(Nc1nc(C2CCC2)cs1)c1ccnc(CO)c1	0.96169
CCC(CC)NC(=O)CSc1nc2cc(C(F)(F)F)ccc2n1Cc1ccccc1	0.00173478
COc1ccc(CCC(=O)NC(C)C(=O)N(C)C)cc1	0.000171532
CCC(NCC1CN(C)C(=O)CO1)c1cccc(OC)c1OC	0.981484
CCCS(=O)(=O)Nc1cccc(NCc2csc(C)n2)c1C	0.107477
Cn1ncc2cc(-c3cc(CCC(=O)O)cc(N)c3OC3Cc4ccccc4C3)ccc21	0.440984
Cc1ccc(F)cc1S(=O)(=O)N1CC(OCc2ccccc2)C1	1.17854e-05
CC(C)(CN)NC(=O)Cc1coc2cc3c(cc12)CCC3	0.396875
CC(NC1CCC(C(=O)O)CC1)c1ccccc1OC(F)F	0.234396
CCOc1cc(C(=O)N2CC(=O)Nc3ccc(C#N)cc32)ccc1C	0.680379
CCOC(=O)CC1=CC(SCC(=O)N2CCN(c3ccccc3OC)CC2)=Nc2ccccc2N1	0.984374
O=C(NCc1ccncc1)Nc1ccccc1CN1CCOCC1	0.817651
O=C(/C=C/CCc1ccccc1)c1ccc(O)cc1	0.528251
CC(C)(O)C#Cc1ccc(-c2nccn2-c2ccc(S(N)(=O)=O)cc2)cc1	0.000230649
CCCNC(=O)Nc1cc(Cl)ccc1F	6.7247e-05
CCS(=O)c1ccccc1C(=O)OCC(=O)c1c(C)[nH]c2ccccc12	0.677315
O=C(OCC1CCS(=O)(=O)C1)c1cc([N+](=O)[O-])cc([N+](=O)[O-])c1	0.0368272
Cc1c(C(=O)O)nn(-c2cccc(F)c2)c1Oc1ccc(NC(=O)c2ccccc2Cl)cc1S(=O)(=O)NC1CC1	0.00514584
O=C(O)c1cccc(-c2cc(C(=O)O)cc(C(=O)O)c2)c1	0.000331851
Cc1cc(N(CCO)CCO)ccc1N=Nc1c(Cl)cc([N+](=O)[O-])cc1[N+](=O)[O-]	0.614647
CCc1nnc(Sc2ncc(C(F)(F)F)cc2Cl)[nH]1	0.0052487
CN(CC(=O)Nc1cccc(Cl)c1Sc1ccccn1)S(=O)(=O)c1cccnc1	0.0730504
CC(Cl)=CCOc1cc(C)nc2c(C)cccc12	0.994751
Cc1nnc(-c2ccc(S(=O)(=O)NCc3cccc(Br)c3)s2)o1	0.00140906
COc1ccc(Br)cc1C1Nc2ccc(C)cc2C2OCCCC12	0.74795
CCC(C)NC(=O)Cn1nc2n(Cc3ccc(Cl)cc3)c(=O)c3sccc3n2c1=O	3.46189e-05
Cn1cc(S(=O)(=O)N2CCN3[C@H](C2)C(=O)N(Cc2ccccc2)C32CCOCC2)cn1	0.00398279
COc1ccccc1C(=O)N[C@@H]1c2ccccc2C2(CCN(C(=O)c3ccc(O)nc3)CC2)[C@H]1OC	0.115579
Cc1c(CC(=O)NC2CCN(Cc3ccccc3)CC2)c(=O)oc2cc3c(cc12)CCC(C)(C)O3	0.795355
O=C(O)C1(O)CCN(C(=O)C2(c3cccc(Br)c3)CCCC2)CC1	6.12297e-05
COc1ccnc(N2CCC(C(=O)NCc3ccc4c(c3)OCCCO4)CC2)n1	0.561936
CCc1nnsc1C(=O)N1CCN(C)C(c2nccn2C)C1	0.941306
Cc1ncc(CN2CCC(C(CC(=O)O)c3ccccc3)CC2)cn1	0.994123
Cc1ccc(CSc2nc3c(c(N(C)C)n2)CCCC3)cc1	0.978898
CNC(=O)C1(Cc2ccc(-c3ccccc3OC)cc2)CCN(C(=O)c2c(C)noc2C)C1	0.0113067
CCc1cc(=O)oc2c(C[NH+]3CCN(C)CC3)c([O-])ccc12	0.996217
COc1cccc(-c2ncn(CC3CN(C)CCN3C)c2-c2ccc(F)cc2)c1	0.755566
Cc1ccccc1[C@@H]1CN(C(=O)CN(C)Cc2ccncc2)C[C@H]1C(=O)O	0.00204205
COc1cccc(C(=O)Nc2nc(-c3nnn(-c4ccc(C(C)C)cc4)c3C)ns2)c1	0.655468
Fc1ccc(CNc2ccc(Oc3ccccc3)cc2)cc1	0.981414
COc1ccc(CC(=O)N2CCN(CC(=O)NC(C)C)CC2)cc1OC	0.945881
Cc1cc(C(=O)NC2CCC(C)CC2)no1	0.00224351
CCC1COC(C)CN1C(=O)c1cccc(Nc2ncccn2)c1	0.866788
Cc1n[nH]c(C)c1S(=O)(=O)N1CCCC(C(=O)NCCN)C1	0.00532672
COCCCNC(=O)c1cc2c([nH]c3ccccc32)c(-c2ccc3c(c2)OCO3)n1	0.996468
CS(=O)(=O)c1nnc(NC(=O)/C(C#N)=C\c2ccc(OC(=O)c3ccccc3)c(Br)c2)s1	0.184501
CCc1ccc(C(C)(C)C(=O)NCc2ccc(C(=O)O)s2)cc1	7.87025e-06
CS(=O)(=O)c1cc(C(=O)N[C@H]2C[C@H](Cn3cncn3)C2)cs1	0.0216602
Cc1cc(C)nc(SCC(=O)Nc2ccc(C(=O)O)cc2)n1	0.000638897
CCc1ccccc1C(=O)N1CCCCC1CCCOC	0.0763513
O=C(CCN1CCSC1=O)NCCOc1cccc(Cl)c1	0.00125761
Cc1ccc(OCC(=O)Nc2nncs2)cc1C	0.738359
Cc1c(C(=O)N(CCCN)Cc2ccccc2)cccc1[N+](=O)[O-]	0.997663
O=C1NCCc2c1ccc(NC(=O)N1CCC[C@H]1Cn1cc(C3CC3)nn1)c2F	0.0279038
CCCCCNC(=O)NCCc1ccc2c(c1)OCCO2	0.0577452
CCN(C(=O)CS(=O)(=O)Cc1ccc(Cl)c(Cl)c1)c1ccccc1	0.00384439
CN[C@@H]1CO[C@@H]2CCN(C(=O)c3ocnc3C)C[C@@H]2C[C@@]1(C)O	0.989435
CN1CCCCCCN(C(=O)c2ccccc2F)[C@H](Cc2ccccc2)COc2ccccc2C1=O	0.099819
Cc1ccc(C(=O)N2CCCC(c3ncc[nH]3)C2)cc1NC(=O)C1CCOCC1	0.964964
Cc1ccc(NC(=O)C2CCN(S(=O)(=O)c3cc(-c4noc(C(C)C)n4)sc3C)CC2)nc1	0.871278
O=C(C[C@@H]1CNC[C@H]1O)NCc1cc(C(F)(F)F)no1	0.000314287
Cc1ccc(F)cc1-n1ccn(CC(=O)Nc2cccc(C(C)C)c2)c(=O)c1=O	0.000153817
CCCCn1nnnc1COC(=O)Cn1cnc2c(oc3ccccc32)c1=O	0.391209
O=C(/C=C/c1ccc(Cl)cc1)NCCc1c(F)cccc1Cl	0.317198
Cc1ccc(C(=O)N(C)CCC(N)C(C)C)cc1S(C)(=O)=O	0.730936
NCc1ccccc1OCC(=O)N1CCc2sccc2C1	0.633658
CC(C)(C)OC(=O)N1CCC(c2c(C(=O)NC3CCCC3)cnn2-c2ccc([N+](=O)[O-])cc2)CC1	0.0274904
C[C@H]1COC[C@H]2CN(C(=O)NCCc3ccccc3)CCN21	0.515257
COc1cccc(-c2nc(C(=O)N3CCOCC3)cc3c2[nH]c2ccccc23)c1	0.994134
Cn1cccc1C1COCCN1C(=O)c1ncc[nH]1	0.493135
CCOC(=O)c1ccccc1NC(=O)CN1CCC(F)C1	0.051862
Cc1ccc(C(=O)N(CC(=O)O)C2CC2)c2ncccc12	0.180676
Clc1cccc2sc(NC3=NCCN3)nc12	0.921824
O=C(Nc1nc2ccccc2n1CCN1CCCC1)C1CCCCC1	0.908889
CNC(=O)C1CN(c2nc3c(OC)cccc3s2)CCO1	0.849862
COC(=O)CCNC(=O)c1ccc2[nH]cnc2c1	0.952826
O=C(NCC1CN(Cc2ccccc2)CCO1)c1ccc2c(c1)S(=O)(=O)N=C1CCCCCN12	0.195606
C[C@@H]1COC[C@@H]1O	0.0168113
Cc1cccc([N+](=O)[O-])c1NC(=O)c1sc2ccccc2c1Cl	0.917926
COCCNC(=O)Cn1cc(-c2cccc3ccccc23)cn1	7.79566e-05
NC(=O)c1cccc(CNC(=O)N2CCOC(c3ccc(F)c(Cl)c3)C2)c1	5.81454e-05
Cc1nc(C(F)(F)F)ccc1C(=O)NC(C(=O)O)C1CC1	7.78124e-05
COC(=O)C1=C(C)N=c2sc(=Cc3ccc(C)cc3)c(=O)n2C1c1ccc(OC(C)=O)cc1	0.819639
Cc1ccccc1C1c2[nH]c3ccccc3c2CCN1C(=O)c1cccc(Cn2cccn2)c1	0.857542
Cc1ccc(-c2csc(-c3nc(-c4ccccc4)cs3)n2)c(C)c1	0.169404
Cc1cc(C(=O)NCc2nn(CCN3CCCC3)c(=O)c3ccccc23)no1	0.83225
O=C(Nc1cncc(N2CCNCC2)c1)c1ccc2cc(Cl)ccc2n1	0.95285
Cc1cnc(C2CCOCC2)n1C1CCN(C(=O)c2nn(C)c3ccccc23)C1	0.947742
Cc1nn(C)cc1-c1ccnc(N2CCCC2c2nc(-c3cccnc3)no2)n1	2.22109e-05
CN(C(=O)NC1CC1)C1c2cc(Cl)cc(Cl)c2CC1O	8.33769e-05
O=C(Nc1cnn(Cc2ccc(F)cc2)c1)c1nc2ncccn2n1	0.425566
CN1C[C@H](c2ccccc2)[C@@H](c2nc(C(C)(C)NC(=O)c3ccccc3)no2)C1	0.291604
Cc1cc(C(=O)N(C)Cc2ncc(C3CC3)o2)c(N)c([N+](=O)[O-])c1	0.0600963
COc1c(O)cc(/C=N/Nc2ccc([N+](=O)[O-])cc2)cc1Br	0.996245
CC#CC(=O)NCc1cccnc1N(C)S(C)(=O)=O	0.00371551
CCOc1ccccc1CN1C(=O)c2cc3ccsc3n2CC1(C)C(=O)NCc1ccc(F)cc1	2.87212e-05
COc1ccc(N2CC(C(=O)Nc3cnn(C)c3)CC2=O)cc1	0.190777
CC(Cc1ccc(NC(=O)Cn2cc([N+](=O)[O-])cn2)cc1)C(=O)O	0.02415
Cc1ccc2[nH]c(CCCNc3nc(CCN)nc4ccccc34)nc2c1C	0.999645
O=C(Nc1scnc1-c1ccc(F)cc1)c1ccn(-c2ccccc2Cl)n1	0.0340978
Cc1ccc(C(=O)NCC(=O)N2CCNCC2)cc1C	0.960795
Cc1nc2oc3c(ccc4ccccc43)c(=O)c2c2nc3ccccc3n12	0.995082
Cc1ncc(CN(C)CCNC(C)(C)C)s1	0.983432
Cc1ccc(C(=O)CCC(=O)Nc2cc3c(cc2Cl)OCCO3)cc1C	0.00101094
CC1CCN(C(=O)c2ccc(OCc3nnc(C(=O)Nc4cccc(Cl)c4)s3)cc2)CC1	0.0946494
COC1=NC(C(C)C)C(OC)=NC1C	0.0205213
CC(=O)Nc1cc(C(=O)N2CCN(c3ccc(-c4noc(C)n4)cc3)CC2)ccc1C	0.997256
Cc1c(C(=O)O)csc1-c1ccc(F)c(CN(C)C)c1	0.00155093
Cc1[nH]ncc1C(=O)N1CCCN(C(=O)Cc2cccc(F)c2)CC1	0.0169625
Cc1[nH]ncc1-c1nnc(NC(=O)CC(n2cccn2)C(F)(F)F)s1	0.155136
Cc1ccc(C(=O)CN(C2=NCCCS2)c2ccc(C)cc2)cc1	0.996024
O=C(O)c1ccc(NO)cc1	0.192215
CCC(O)C1CCCCN1C(=O)c1conc1C(F)(F)F	0.000471341
CCCCOc1ccc(N2C(=O)CC(NCCc3ccc(OC)c(OC)c3)C2=O)cc1	0.0555502
CNC(=O)CSc1ncc(-c2ccccc2)n1-c1ccc(OC(F)F)cc1	0.0206256
Cc1cccc2[nH]c(C3CCCN(C(=O)CCn4cncn4)C3)nc12	0.997377
COc1ccc(C(C)NC(=O)c2ccc3c(c2)OCO3)cc1	0.118877
O=C(c1cc(S(=O)(=O)N2CCCCC2)c[nH]1)N1CCN(c2ccc(Cl)cc2)CC1	0.0130431
CCOc1ccc(CC(CNC(=O)C2CSc3ccccc32)C(=O)O)cc1	4.78161e-05
O=C1C2CCCCN2C(=O)N1Cc1cccc(Cl)n1	0.0030201
O=C(NCc1cnccn1)C1CCN(c2cnc(N3CCSCC3)nc2)CC1	0.878314
CCC1(CC)CC(=O)N(c2nc(N(C)C)nc(N(C)C)n2)NC1=O	0.816657
CC(C)n1c2ccccc2c2nnc(SCC(=O)Nc3nnc(COc4ccccc4)s3)nc21	0.0176432
COc1cccc(C)c1NC(=O)N1CCCN(Cc2ccccn2)CC1	0.964539
Cc1cnc2c(Cl)c(C(=O)Nc3cnc4n3CCCC4)nn2c1	0.915144
Cc1ccccc1C(=O)NN=Cc1ccsc1C	0.00481715
Cc1cccc(C)c1NC(=O)COC(=O)c1cc(Cl)cc(Cl)c1I	0.0130066
COc1ccc(N(CC(=O)Nc2cccc(Cl)c2)S(=O)(=O)c2ccccc2)cc1OC	0.815439
CCOC(=O)c1c(C)oc2nc(C)nc(N(C)c3ccc(F)cc3)c12	0.0275004
CC1=C(C)C(=O)c2c(c(O)c3cc([N+](=O)[O-])ccc3c2Cl)C1=O	0.892452
COc1ccc(-c2[nH]nc(C)c2CC(=O)NC2CC[S+](=O)([O-])C2)cc1	0.000109508
CC[C@@H]1C[C@H]1NC(=O)c1ncoc1-c1ccc2c(c1)OCCO2	0.989213
Nc1nccc(C2CN(C(=O)CC3CCC4(CCOCC4)CO3)C2)n1	0.255321
c1ncc(-c2noc(Cc3ccsc3)n2)cn1	0.895645
Cc1ccc(C)c(OCC(=O)N2CCS(=O)CC2C(=O)O)c1	0.000203032
COc1ccc(-c2cc(C(F)(F)F)nc(S(=O)(=O)CCCC(=O)Nc3cc(C)on3)n2)cc1OC	0.847436
O=C(N1CCCCC1)N1CCC(c2nc3ccccc3[nH]2)CC1	0.98902
CC1CN(Cc2ccccc2)CCCN1c1ncc(C(=O)O)s1	0.0125414
COCc1nccc(N(Cc2nc(C)cn2C)CC2CCCCC2)n1	0.31428
CCOc1ccc(/C=N/NC(=O)CCCCCCCC(=O)N/N=C/c2ccc(OCC)cc2)cc1	0.983981
Cc1cccc(OC(=O)c2cccnc2)c1C	0.205995
Cc1ccc(Cn2cc(C(CC(=O)NCCN3CCCC3)c3ccc(OCc4ccccc4)cc3)c3ccccc32)cc1	0.986888
Cc1cc2nc(COC(=O)c3ccc(Cl)c(NC(=O)COc4ccc(Cl)cc4)c3)cc(=O)n2o1	0.0427986
COC(=O)c1cn(Nc2nc3ccccc3nc2O)cc2c(=O)[nH]nc1-2	0.971394
O=C(NNC(=O)c1ccccc1OCC1CCCO1)c1cc2c(s1)CCCCC2	0.00124684
O=[N+]([O-])c1cc(C(F)(F)F)ccc1N1CCN(C(c2ccccc2)c2ccccc2)CC1	0.570069
N#CC1=C(N)Nc2onc(-c3cccc(O)c3)c2C1c1ccccc1	0.00339832
O=C1N[C@@H](Cc2nc(Cc3csc(-c4ccccc4)n3)no2)C(=O)Nc2ccccc21	0.133036
CCOc1ccc(CN2CCCC2c2ccc(Nc3cccc(C)n3)cn2)cc1CO	0.989806
CCOc1ccc(-n2c(SCC(=O)NCc3cccs3)nc3[nH]ncc3c2=O)cc1	0.000277081
Cc1cc(CNC(=O)CCC(=O)O)on1	0.0211337
O=C(NC1CCCCC1)N1CCC(c2nnc(C(F)(F)F)o2)CC1	0.0249373
CC1(C)CNC(=O)c2nc(-c3ccc(-n4cncn4)cc3)[nH]c2C1	0.974864
CC(C)(C)c1cn2nc(OCC3CCN(c4ccc(C#N)nc4)C3)ccc2n1	0.184266
COc1cc(Cl)ccc1C(C)NC1CCn2ccnc2C1	0.926067
Nc1ccnc(-c2noc(C3(C(F)F)CCCCC3)n2)n1	0.00513723
CSc1ccccc1NC(=O)c1ccccc1NS(=O)(=O)c1ccc(C)cc1	0.114922
COc1cccc(CCC(=O)N[C@@H](C(=O)O)C(C)C)c1	0.000271777
Cc1cc(CN2CCC(Nc3cc(N(C)C)ncn3)CC2)nn1C	0.99684
Cc1ccc(Cn2c(=O)c(N3CCC(NC(=O)NCCc4ccccc4)CC3)nc3cccnc32)cc1	0.986333
CC(C)NC1CCCN(C(=O)Cc2ccc3ncsc3c2)C1	0.986167
CN(Cc1ccc(C(=O)NC2CC2)cc1)Cc1ccccc1Cl	0.869753
CCN(C(=O)c1cccc(C#N)c1)c1cccc2ccccc12	0.0133381
CC1(C)Cc2cccc(OCC(=O)Nc3ccc(Cl)c(Cl)c3)c2O1	0.130697
N[C@H]1CCN(C(=O)COc2ccc(Cl)cc2)C1	0.959536
Cc1cccc(OCCCCC(=O)N2CCn3c(C)nnc3C2)c1	0.498786
Cc1cccc2cc(C(=O)N(C)[C@@H](C)C(=O)O)sc12	0.0227463
CCc1nccn1CC(=O)N1[C@H]2CCCC[C@H]3N(C)[C@H](Cc4ccccc4)[C@@H]1C[C@@]23C	0.692167
O=C(CCc1ccc(=O)[nH]c1)Nc1cccc(-c2ccc3c(c2)CCO3)n1	0.461611
O=C(NC1CC1)c1ccc(CNc2nc(-c3ccccn3)nc3sc(-c4ccccc4)cc23)cc1	0.00199298
Cc1ccccc1CNC(=O)CC1CCN(S(=O)(=O)c2ccc(Cl)s2)CC1	8.0906e-05
Cc1cc2nc(-c3ccc(SCc4ccccn4)nc3)[nH]c2cc1C	0.999847
O=[N+]([O-])c1cc(F)ccc1-n1cc(Cl)cn1	0.000576672
Cn1cccc1C(=O)N1CCC2(C1)NC(=O)N(Cc1ccc(Cl)cc1)C2=O	4.87656e-05
CC(C)CCNC(=O)CCC[C@H]1NCC2CC1CN(Cc1cccnc1)C2	0.985366
CC(C)Oc1cccc(-c2noc(C3CCCNC3)n2)c1	0.990508
Cc1cc2c(Oc3ccc4c(c3)OCCC4)ncnc2[nH]1	0.000110356
Cc1ccccc1CN1CCCC1c1cncc(Nc2nncs2)n1	0.915163
COC(=O)[C@@]1(C)CC[C@]2(C)CC[C@]3(C)C(=CC(=O)C4[C@@]5(C)Cc6c([nH]c7ccccc67)C(C)(C)C5CC[C@]43C)C2C1	0.589234
CCN(CC)C(=O)[C@H]1CN(Cc2ccccn2)C[C@@]12CCc1ccccc1C(=O)N2	0.0782996
CCS(=O)(=O)N(C)C1CCN(Cc2nc(CC(F)(F)F)no2)CC1	0.459959
CN(C)CCCn1ccnc1C1CCN(C(=O)[C@H](N)C2CCCCC2)CC1	0.994822
Cc1cccc(C(C)(C)C)c1NC(=O)N1CCn2cncc2C1	0.0426952
COCCCn1c(Cc2csc(Nc3cccc(Cl)c3)n2)nnc1SCC(=O)OC	0.0034588
Cc1ccc(/C=C2/SC(=S)N(CCC(=O)Nc3ncc(Cc4ccc(C)cc4)s3)C2=O)cc1	0.968878
CC(C)(C)C1CCC(c2cc(NC(=O)[C@@H](N)CCC(=O)O)[nH]n2)CC1	0.567399
Cc1cnc(CNC(=O)CC2CCC(=O)NC2)c(C)c1	0.630627
O=C1N/C(=N/c2cc(C(F)(F)F)ccc2Cl)S/C1=C\c1ccc(OCc2ccccc2Cl)cc1	0.975502
COc1ccccc1C1Cn2nnc(C(=O)N3CCCC(C(=O)Nc4ccc(F)cc4Cl)C3)c2CO1	0.734048
O=C(N1Cc2cccc(Cl)c2C1)C1(C2(O)CCNCC2)CCC1	0.507859
CC1(N)CCN(C(=O)CCc2ccc(-c3ccccc3F)o2)C1	0.983327
COC(=O)C(Cc1c[nH]c2ccccc12)NC(=O)CON=C1C=C2CCC3C(CC[C@@]4(C)C3CC[C@]4(C)O)[C@@]2(C)CC1	0.0307774
O=C(O)C=Cc1ccc(S(=O)(=O)N2CCN(c3ncccn3)CC2)cc1	0.123881
Cc1nnc(NCC2(N3CCOCC3)CCCCC2)c2ccccc12	0.789751
COC(=O)c1ccc2c(=O)[nH]c(CSc3nnc(C)n3-c3ccc(C)cc3)nc2c1	0.00864663
COc1cccc(C(C)CC(=O)NC2(C(=O)O)CCOCC2)c1	2.62993e-05
COc1ccc2[nH]c(CN3CCOC(c4cnccn4)C3)cc2c1	0.997491
CCCCOc1ccc(CNC(=O)c2nnn3c2COC(c2cc(Cl)ccc2Cl)C3)cc1	0.0153053
O=C(CN1C(=O)NC(Cc2c[nH]c3ccccc23)C1=O)NCc1ccco1	0.00347669
Cc1cnc(N2C[C@@H]3[C@@H](C2)OCC(=O)N3Cc2cccnc2)nc1	0.993713
CC(=O)Nc1ccc(NC(=O)C2CCN(C(=O)c3cc4n(n3)CC(c3cccc(C)c3)OC4)CC2)cc1	0.953801
Cc1ccccc1C(CC(=O)O)NC(=O)Cn1ccc(C(F)(F)F)n1	3.56832e-05
COCCn1nnnc1C(c1cc2cc(OC)c(OC)cc2[nH]c1=O)N1CC=C(c2ccc(F)cc2)CC1	0.733254
CCS(=O)(=O)N1CCCC(C(=O)Nc2cccc(OC)c2)C1	0.0276927
CCSC1=NC2(CCN(C(=O)Nc3cccc(OC)c3)CC2)N=C1c1ccc(OC)cc1	0.95457
Cc1ccc(Oc2ncccc2CNC(=O)Cc2nonc2C)c(F)c1F	0.939082
COc1ccc(-c2csc3c(=O)n(Cc4cc(=O)n5ccccc5n4)cnc23)cc1OC	0.784229
CC(C)(C)c1nc(N)nc(NC(c2ccccc2)C(C)(C)CO)n1	0.0539491
Cn1nc(C(=O)N2CCCC(C(=O)N3CCCC3)C2)c2c1CCN(C(=O)c1ccc(Cl)cc1)C2	0.0146643
COc1cccc(-n2c(=O)c3ccccc3c3ccccc3c2=O)c1	0.159596
Cc1[nH]c(=O)[nH]c(=O)c1CCC(=O)N1CCN(c2ncnc3c2cnn3C)CC1	0.990342
CC(=O)N(CCc1noc(C2CC2)n1)C1CCN(C(=O)c2cn(C)cn2)C1	0.846129
CC(C(=O)Nc1nnc(C(F)(F)F)s1)C(N)c1ccccc1	0.00718665
O=c1oc2ccccc2c(NC2CCCC2)c1NS(=O)(=O)c1cccs1	0.0389203
COc1ccc(NC(=O)Cc2c(C)c3cc4c(C)coc4c(C)c3oc2=O)c(OC)c1	0.751209
COc1ccc(CCOc2ccc(C3CC(O)=Nc4c3c(C)nn4-c3ncnc4[nH]cnc34)cc2)cc1	0.00548834
COc1cc2nc(NC(=O)c3cc4cc([N+](=O)[O-])ccc4s3)sc2cc1OC	0.993151
Cc1c(Br)cncc1NC(=O)Nc1c[nH]nc1-c1ccccn1	0.0847066
O=C(/C=C/c1ccccc1)OCC(=O)c1ccc(-n2nncc2-c2ccco2)cc1	0.230192
O=C(c1ccc(N2CCOCC2)cc1)N1CCC(N2CCNCC2)C1	0.996773
CCOC(=O)c1c(C)noc1C(C)C	0.0273768
COc1cccc(-c2ccc(C(=O)N(C)C(C)Cc3ccccn3)cc2)c1	0.98986
CCOc1cc(C(=O)NNC(=O)c2ccccn2)ccc1OCc1cccnc1	0.999252
CC(=O)c1ccc(S(=O)(=O)N(C)Cc2cc3ccccc3[nH]c2=O)cc1	0.452219
Cc1cc(C(=O)NN=C2C(=O)N(C(c3ccccc3)c3ccccc3)c3ccccc32)c(C)o1	0.334894
Cc1nn(C)c(C(=O)N/N=C/c2ccc(Cl)s2)c1Cl	0.000105928
COc1ccccc1NS(=O)(=O)c1cc(NC(=O)C(C)CN)ccc1C	0.0779391
Cc1ccccc1C(=O)NCc1c(-c2ccc(F)cc2)nc2n1CCS2	0.000469325
CC(=O)N(C)CCCN(C)C(=O)c1cc2ccc(C(F)(F)F)cc2[nH]1	0.683396
CC(Cn1cncn1)NC(=O)CC(O)c1cc(Cl)cc(Cl)c1	0.0135017
CN(c1ccccc1)c1ccc(C(=O)N2CCC[C@H]3CNC[C@H]32)cn1	0.998414
Cc1cc(C)cc(NC(=O)Nc2ccc3c(c2)N(S(C)(=O)=O)CC3)c1	0.0118878
CCc1ccc(N(CCCC(=O)NC2CCN(C)CC2)S(C)(=O)=O)cc1	0.20095
CO[C@H]1CCCC[C@@H]1NC(=O)c1cccc2c1COC2	0.000369692
CCCc1cc(C(=O)OC(C)C(=O)Nc2ccccc2[N+](=O)[O-])[nH]n1	0.37794
COCCN1CC(C(=O)OCC(C)(C)C)CC1=O	0.0036931
Cc1cc(F)cc(C)c1B1OC(C)(C)C(C)(C)O1	0.0271802
CC#CCSc1nnc2c(=O)n(-c3ccc(Cl)cc3)ccn12	0.292589
N#CC1(NC(=O)CSc2nc3sccc3c(=O)[nH]2)CCCC1	0.0808849
CCC12COC(=O)N1CCN(C(=O)Cc1ccc(Cl)cc1)C2	0.000106818
CSc1nc(=O)n(C(C)C(C)(C)C)c(=O)n1N	0.00212774
Cc1ncccc1C(=O)N[C@H]1COC[C@H]1CS(=O)(=O)N(C)C	0.39518
CCOc1ccc(S(=O)(=O)N=C(c2ccccc2)N2CCc3ccccc3C2)cc1	0.0306599
CCCCc1ccc(NC(=O)c2cccc(NC(=O)CCC)c2)cc1	0.01256
Cc1cnc(Nc2nccc3cccnc23)nc1N(C)C	0.933517
COc1ccc(C(=O)C2=C(O)C(=O)N(CCN3CCOCC3)C2c2ccc([N+](=O)[O-])cc2)c(O)c1	0.998447
CC(C)N(Cc1ccc([N+](=O)[O-])cc1)C(=O)c1ccc(C(=O)O)o1	0.643793
COc1cccc(CNC(=O)C2=Cc3sc4c(c3CS2)CCC(C)C4)c1	0.276796
OCc1cn(-c2ccc(F)c(Cl)c2)nn1	0.000214417
Cc1ccc(C(=O)c2coc3cc([N+](=O)[O-])c(O)c([N+](=O)[O-])c23)cc1	0.874691
Sc1nnc(COc2ccccc2)n1/N=C/c1c2ccccc2cc2ccccc12	0.761287
FC(F)(F)Oc1ccc2oc(NCc3ncoc3C3CC3)nc2c1	0.0335424
CCCn1cc(S(=O)(=O)N[C@H]2Cc3ccc(cc3)OC[C@H](Cc3ccccc3)NC(=O)[C@@H](C(C)C)NC(=O)[C@H]([C@@H](C)O)NC(=O)[C@@H](C)NC2=O)cn1	3.71052e-05
CN(C)CCOc1cccc(NC(=O)CNc2ccccc2)c1	0.980932
CC(=O)C1C2C(=O)N(c3ccccc3)C(=O)C2C2c3ccccc3C=CN12	0.0173756
Cc1nc(CN2CCC[C@]3(CN(Cc4cccs4)C[C@H]3c3ccnn3C)C2=O)cs1	0.3896
Cn1cc(C(=O)N2CCN(S(=O)(=O)c3c(Cl)cccc3Cl)CC2)c2ccccc21	0.967635
CC(C)S(=O)(=O)N1CCC(N2C(=O)NCC23CCOCC3)CC1	0.000243977
Cc1cc(NCC(O)CNC(=O)C2(CC(C)C)CCCC2)c(C#N)cn1	0.00735412
Cc1nc(CN2CCN(C(=O)c3ccc4c(c3)CCC4)CC2)cs1	0.990528
CCC(C)NC(=O)c1ccc(Sc2ccc(NS(=O)(=O)c3cccc(OC)c3)cc2)nc1	0.00732387
Cc1ccc(-c2nc(CC3CCNCC3)no2)c(Cl)c1	0.997457
COc1ccc(C(=O)Nc2c3c(nn2-c2ccccc2C)CSC3)cc1	0.000127387
C[NH+](C)CCCN1C(=O)C(=O)C(=C([O-])c2ccc(Br)cc2)C1c1ccc(Cl)cc1	0.551227
O=C(O)CC1CN(C(=O)CCCOc2ccccc2Br)CCO1	0.00802965
CC(=O)C1CCC2C1C(C(C)C)CCC2(C)O[C@@H]1O[C@H](CO)[C@@H](O)[C@H](O)C1O	0.251675
Cn1cnc(CN2C[C@@H](O)[C@@H](O)C([C@H](O)CO)OCCCCCCOc3cccc2c3)c1	0.950164
CC(C)(C)NC(=O)CCCN1C(=O)/C(=C\c2ccco2)SC1=S	0.780311
CN(CC(=O)N1CCC(C(=O)O)CC1)C(=O)c1cc(O)nc2ccccc12	0.960836
O=C(c1ccc(-c2ccco2)cc1)N1CCCC(C(=O)N2CCOCC2)C1	0.226385
CCCC(NC(=O)c1cccc(C#N)c1)C(=O)O	0.00107536
CC1CCCC(C)N1C(=O)Cn1nc2c(cc1=O)CN(C(=O)OCc1ccccc1)CC2	0.183316
N[C@@H]1CCN(C(=O)c2occc2CN2C(=O)Cc3ccccc32)C1	0.663577
CC(C)Oc1ccc(CCNC(=O)CCCc2nnn[nH]2)cc1	0.497942
CCOC(=O)c1ccc(NC(=O)Nc2ccc(OC)cc2Cl)cc1	0.465281
O=C(NCC1CCC(F)(F)CC1)c1csnc1Cl	0.000150284
CN(Cc1nc(-c2cccs2)no1)C1CNC(=O)C12CC2	0.309634
COc1cccc(NC(=O)CN2C(=O)C(=Cc3cccc(Br)c3)SC2=S)c1	0.704973
COC(=O)CNC(=O)c1ccc(NC(=O)CCc2ccccc2Cl)cc1	0.00307974
O=C(NC1CCN(c2cc(-c3cccs3)n[nH]2)C1)c1ccccc1Br	0.539537
CC(=O)c1cccc(NC(=O)C(C)OC(=O)c2ccc(CSc3nc4ccccc4s3)cc2)c1	0.0725922
O=C(NCc1cccnc1OC1CCCC1)c1ccc(Cl)cc1N1CCCC1=O	0.371088
N#Cc1ccc(NCCc2csc(Br)c2)nc1	0.925048
CC1(CN)CCN(C(=O)c2ccc(I)c(F)c2)C1	0.737742
COc1ccc(CNC(C)C2CCCO2)cn1	0.998171
Cc1ocnc1-c1nc(C2(N)CCCC2)no1	0.0241224
O=C(c1cnc(O)cn1)N1CCc2oc(C3CCC3)nc2C1	0.946897
O=C1c2ccccc2C(=O)N1CCCn1c2ccc(Br)cc2c2nc3ccccc3nc21	0.990329
COc1ccccc1-c1ccc(B(O)O)cc1	0.000244238
CC(=O)Nc1cccc(NC(=O)CSCc2nc3sc(C(C)C)cc3c(=O)[nH]2)c1	0.361607
CC1NC(=O)C(C)N(C(=O)c2ccc3c(n2)OCCO3)C1C	0.819336
CS(=O)(=O)Nc1ccc(-c2csc(NCCc3cccs3)n2)cc1	0.244409
CCOC(=O)c1ccc2c(=O)n(Cc3ccccc3)c(SCC#N)nc2c1	0.00113251
CNCC1CCN(C(=O)c2csc(-c3ccoc3)n2)C1	0.951023
COc1ccccc1CC(=O)N1CCCC(c2nccn2CCN(C)C)C1	0.962259
CC1=NN(Cc2ccc(Cl)cc2)C(=O)C1C1CCS(=O)(=O)C1	0.000292998
CN1Cc2c(NCc3ccc(C(C)(C)O)cc3)cccc2C1=O	0.0800888
Cn1cnc(C(=O)NC2(CC(=O)O)CCCCC2)c1	0.0853363
COC(=O)c1sccc1NC(=O)Nc1ccc2nc(S(C)(=O)=O)sc2c1	0.000752283
COCCC(NC(=O)c1coc(-c2c(F)cccc2F)n1)C(=O)O	0.00336752
COc1ccc(NS(=O)(=O)c2ccc(NS(=O)(=O)c3ccccc3[N+](=O)[O-])cc2)cc1	0.96558
Cc1nccn1CC1CCCN(c2ncc(Cl)cn2)C1	0.337152
Cc1ccc(NC(=O)c2cccc(F)c2)c(Cl)c1	0.613359
C=C1[C@@H](O)C[C@H]2C(C)(C)CCC[C@]2(C)[C@H]1C=Cc1ccoc1	0.48357
O=C(Nc1cccc(Br)c1)c1cccc(OC(=S)N2CCCCC2)c1	0.989505
Cc1ccc(S(=O)(=O)NC(Cn2cncn2)C(=O)O)c(Cl)c1	0.000329965
Cc1ccc(C(=O)N2CCC(N3CCCOCC3)CC2)c(Cl)c1	0.989394
CCOc1ccc(-n2nnnc2SCC(=O)Nc2ccccc2C)cc1	0.268196
C=CCn1c(=O)n2nc(-c3ccncc3)nc2c2c3c(sc21)COC(C)(C)C3	0.0238207
COc1ccc(-c2cc(C(=O)Nc3cc(C)ccc3C)c3ccccc3n2)cc1OC	0.990259
COc1cc(=O)n(-c2ccccc2)cc1C(=O)NCc1ccco1	0.00985483
CS(=O)(=O)c1nc(C(=O)NC2CCCCC2CN)c2ccccn12	0.0122332
CC(C)C[C@H](NC(=O)CNC(=O)CCc1ccoc1)C(=O)O	0.000330631
Cc1cc(NC(=O)NC(C)CC(O)c2cccs2)ccc1Oc1cccnc1	0.429813
Cc1oc2c(C)c3oc(=O)c(CCC(=O)N4CCCCC4)c(C)c3cc2c1C	0.802167
COc1cccc(-c2c(C(=O)N/N=C/c3ccccc3)nnn2-c2nonc2N)c1	0.329576
Cc1ccc(C(=O)COC(=O)c2ccccc2O)cc1C	0.538207
O=C1CC(NCc2ccncc2)C(=O)N1c1ccc(F)cc1	0.785156
CC(NC(=O)C=Cc1ccc(Br)s1)C1CCCO1	0.00147492
CC(=O)Nc1cccc(N2CC(C(=O)NCCc3ccc(C)cc3)CC2=O)c1	0.000518277
C=CC(=O)Nc1ccc(CCC(=O)Nc2cncc(/C=C/S(C)(=O)=O)c2)cc1	0.00194038
O=C1c2ccccc2C(=O)N1CSc1nnc2c(n1)[nH]c1ccccc12	0.627316
CC[C@H](C)[C@H](NC(=O)C(C)OCCC(C)C)C(=O)O	8.73215e-05
Cc1cc(Br)c2c(c1)/C(=N\NC(=O)COc1ccc(C(C)(C)C)cc1C)C(=O)N2	0.113731
CN(C)c1cncc(NCc2ccc3c(c2)COC(C)(C)O3)c1	0.996373
Cc1ccc(F)cc1-c1nn(C)c(=O)[nH]1	4.52787e-05
CNC(=S)NN=Cc1c(C)n(CCOc2ccc(OC)cc2)c2ccccc12	0.998393
CCOC(=O)Cc1cccc(NC(=O)C(C)c2c(C)nn(CC(F)(F)F)c2C)c1O	1.41601e-05
C=CCN(Cc1cnc(S(=O)(=O)Cc2cccc(Cl)c2)n1CC(C)C)S(=O)(=O)c1ccccc1	1.24097e-05
O=C(CSc1nc2ccc(C(F)(F)F)cc2s1)Nc1nccs1	0.0754368
NC(=O)CCC1CCCN(c2nc(-c3ccccc3)nc3c2CCNC3)C1	0.993836
CC(NC(=O)c1cc(F)cc(-c2nccc(N)n2)c1)c1ccc2c(c1)OCCCO2	0.0181867
CCOc1cc(C)c(Cl)cc1S(=O)(=O)N(CC)c1cccc(C)c1	0.465888
Cc1cc(C(=O)N(C)[C@@H](C)c2cccnc2)c(C)n1C	0.000537076
O=C(COc1ccccc1)/N=c1\[nH]nc(-c2ccccc2Cl)s1	0.0587097
O=C1CCCc2[nH]c(=O)c(C(=O)NCc3ccc(Cn4ccnc4)cc3)cc21	0.644895
COc1cccc(OCC(=O)N2CCCC(C(=O)O)C2)c1	0.0242198
Cn1cc(N2CCN(c3nccc(C(=O)O)n3)CC2)cn1	0.0030766
CCCCN1CCc2[nH]cnc2C12CCN(Cc1ccc3c(c1)OCO3)CC2	0.973283
Cn1cc(C(O)CNS(=O)(=O)c2cccc3ccccc23)c2ccccc21	0.144272
Cc1cccc(C2Cn3cnc(C(=O)N4CCCC(C(=O)Nc5ccc(Cl)cc5C(F)(F)F)C4)c3CO2)c1	0.164234
O=C(NCc1cc(O)ncn1)c1cccc2ncnn12	0.124424
COc1nn(C)cc1C(=O)N1CCN(C(C)=O)C2(CCCCC2)C1	0.804908
O=C1/C(=C2/C(=O)N(Cc3ccc(Cl)cc3)c3ccccc32)SC(=S)N1Cc1ccccc1	0.00274041
CN(C(=O)c1ccc(C(=O)N(C)c2ccccc2)cc1)c1ccccc1	0.995021
CNCC1CCCN(Cc2cc(C)ccc2OC)C1	0.999496
CCCNC(=O)CCC(=O)N[C@H](C(=O)O)[C@@H](C)CC	0.000131448
N=C(NO)c1ccc(O)cc1F	0.00134864
CC(CCNC(=O)CCNC(=O)c1ccco1)Nc1ccc(C#N)nc1	0.0127127
COc1ccccc1-c1cc(C(F)(F)F)c2c(C)nn(Cc3ccccc3Cl)c2n1	0.000146921
Cc1nn(C)c(C)c1[C@H]1OCC[C@@H]1NC(=O)c1ccc2c(c1)ncn2C	0.00817752
O=C(NC1CCSC1=O)c1cc(C2CC2)ncn1	0.00912406
CN1CC[C@H](O)[C@H](C(=O)N2CCN(c3cccc(O)c3)CC2)C1	0.994801
Cc1cccc(C)c1NC(=O)C(=O)N/N=C/c1ccc(OCc2ccccc2)cc1	0.420718
CC(CO)CC(NCc1cn(CCO)cn1)C(=O)O	0.416731
COC1CCN(C(=O)Cn2ccc3ccc(F)cc32)C(C(=O)O)C1	0.0033676
CCn1cnnc1CCNc1nc2c(F)cccc2cc1Br	0.991703
CCc1noc(-c2ccc(CCNC(=O)C(C)(C)N)cc2)n1	0.986312
COc1ccc(CCNc2ncnc3sc4c(c23)CCCC4)cc1OC	0.028396
Cc1cc(Cl)ccc1S(=O)(=O)NCCCC(=O)O	0.0001875
Cc1ccc(N2CCC(N3CCCC[C@H](N(C)C)C3)CC2)cc1	0.997132
Cc1ccccc1CN1CCC(NC(=O)c2c(C)oc(C)c2C)CC1	0.647331
O=C(c1cccc(/C=C2\SC(=O)N(Cc3ccccc3F)C2=O)c1)N1CCN(c2ccc(F)cc2)CC1	0.307168
Cc1ccc(-c2nc3ccc(I)cc3c(=O)n2-c2c(Cl)cccc2Cl)cc1	0.858571
CCC1(C(=O)N[C@H]2CC[C@H](Nc3ccccn3)CC2)COC1	0.0120952
CC(C)c1ccc(-n2c3c(cc(C(=O)NCc4ccc(F)cc4)c2=O)C(=O)CCC3)cc1	0.000144822
Cc1cc(N/N=C/c2ccccc2)nc(-c2ccccc2O)n1	0.0694826
COc1ccc(F)c(CN2CCCC(O)(CNCc3snnc3C)C2=O)c1	0.0165323
Cc1c(C=NNC(=O)c2cc(C(C)(C)C)n[nH]2)c2ccccc2n1Cc1ccccc1	0.00283662
CC12CC(c3ccccc3O1)n1c(sc(=C3C(=O)Nc4ccc(F)cc43)c1=O)=N2	0.000322841
Cc1cc([N+](=O)[O-])c(Cl)nn1	0.014341
O=C1CSC(c2ccc3c(c2)OCO3)c2c(O)nn(C3CCCC3)c2N1	0.000722319
O=C1CCCN1CCCNCc1c[nH]nc1-c1cc2ccccc2o1	0.988874
CO[C@@H]1CC[C@@]2(c3nc(-c4cc(C(=O)OC(C)(C)C)no4)no3)CC[C@@H]12	0.0377356
CC1(c2ccccc2Br)NC(=O)N(CC(=O)Nc2ccc(OC(F)(F)F)cc2)C1=O	0.000488331
COCCn1cc(C(=O)NCC2(C(=O)O)CCOCC2)c2ccccc21	0.000167961
CN1/C(=C2/S/C(=N\c3ccc(Br)cc3)N(C3CCCCC3)C2=O)Sc2ccccc21	0.855156
CC(C)CNC(=O)c1cc(Cl)ccc1NS(C)(=O)=O	1.86048e-05
O=C(c1ccc(Br)cc1OC(F)(F)F)C(F)(F)C(F)(F)C(F)(F)F	0.361551
CCOc1ccccc1NC(C)C(=O)N1CCCC1c1cccs1	0.00646171
CCS(=O)(=O)Cc1cc(=O)oc2cc(Br)ccc12	0.564133
Cc1cc(C)nc(N2CCC(NCCCc3c(C)n[nH]c3C)CC2)n1	0.985802
Cc1cnc(C(=O)N(C)CC2(O)CCCN(c3ncccn3)C2)cn1	0.997825
COc1c(C)c2c(c(O)c1CC=C(C)CCC(=O)NC(C(N)=O)c1ccccc1)C(=O)OC2	0.0153461
C[C@@H](NC1CCN(c2cnccn2)CC1)c1ccc2c(c1)CCCC2	0.906146
CCOC(=O)c1c(-c2ccc(C(C)(C)C)cc2)csc1NC(=O)CCl	0.000681029
CCOc1cc(C#N)cc(Cl)c1OCC(=O)c1cc(C)n(Cc2ccco2)c1C	0.0274789
COCC(C)(CC(=O)OC)NC(=O)C1CCNCC1	0.951542
CN(CC(=O)N1CCCC[C@@H]1C(=O)O)S(=O)(=O)c1cccnc1	0.00482496
O=C(O)c1n[nH]c2ccc(C(=O)N3CCCC(OCCO)C3)cc12	0.362047
Fc1ccc(CN2CC3(CCN(c4ncccn4)C3)C2)cc1	0.976208
CN(C(=O)Oc1ccccc1)c1ccc(OCC(=O)NCc2ccccc2F)cc1	0.00162965
COCc1cccc(CNCc2cccc(OC)n2)c1	0.974577
Cc1csc2c(=O)n(Cc3cnoc3C3CC3)cnc12	0.00622224
Cc1nn(-c2ccc(Cl)cc2Cl)c(C)c1CC(=O)N1CCCC(C2CC(N)CCO2)C1	0.214961
O=C(Cn1cnc2ccccc2c1=O)Nc1ccccc1C(=O)NCc1ccco1	0.009035
CCOc1ccc(C(=O)Oc2ccc(Br)cc2/C=N/NC(=O)c2cccnc2)cc1	0.942964
CCOC(=O)c1c(NC(=O)c2ccccc2Cl)sc(C(=O)Nc2ccccc2OCC)c1C	0.00496088
Cc1n[nH]c(C2CC(NC(=O)C3CCOCC3)CN2C(=O)c2ccc(C)c(F)c2)n1	0.813195
Cn1nc(C2CCN(C(=O)c3ccc(O)cc3)CC2)n(Cc2ccccc2)c1=O	0.719723
CN(C)C(=O)c1cc(NC(=O)[C@H]2CCCCN2)ccc1Cl	0.895523
O=C(O)C1CCCN(C(=O)Cc2csc(-c3ccccn3)n2)C1	0.947673
Cn1c(=O)oc2ccc(NC(=O)C(C)(C)N)cc21	0.00449942
COc1cccc(C2CC(c3ccc(Br)cc3)=NN2C(=O)c2ccc(Br)o2)c1	0.851725
O=C1COCCN1CCBr	0.00763328
O=c1c2sc3ccccc3c2[nH]c(=S)n1Cc1ccccc1Cl	0.535819
Cc1cc2c(N3CCN(c4cc(-c5ccccc5)ncn4)CC3)nccn2n1	0.82681
COC(=O)NCC(c1ccco1)N1CCN(c2ccc(OC)cc2)CC1	0.986224
COc1ccc(-c2nnc(Cn3nc(C)c(S(=O)(=O)N4CCOCC4)c3C)o2)cc1	0.000427903
COc1ccc(Br)c(C(=O)N2CCN(CCc3ccccc3)CC2)c1	0.995447
O=C(NC1CCCC1)N1CCC2(CC1)CCn1c(-c3cccc(F)c3)cnc12	0.0149825
COCCC1CCN(C(=O)[C@H]2OCC(=O)N[C@@H]2c2ccccc2)CC1	4.04873e-05
COC(C)(C)C(C)NC(=O)c1cccc(C)c1N	0.342823
Cc1ccc(-c2ccc(=O)n(Cc3ccccc3)n2)cc1	0.000695201
COCCn1nc(C)c(CNC(=O)CN(C)Cc2ccccc2)c1C	0.00180432
Cc1cccc(-c2nn(-c3ccccc3)cc2C2CC(c3ccco3)=NN2C(=O)CCC(=O)O)c1	0.00228452
CCN(Cc1ccnc(-c2nn[nH]n2)c1)c1ccc(F)c(F)c1	0.744509
Cc1noc(C)c1Cc1ccc(C(=O)O)cc1	0.0108484
CCCn1cc(NC(=O)c2ccc(N3CCC(C)=N3)cc2)ccc1=O	0.6385
O=C(c1ccc(OCc2ccc(Cl)cc2)cc1)N(Cc1ccc(OCc2ccccc2F)cc1)c1ccccn1	0.999576
O=C(NN=Cc1cccc(Oc2ccccc2)c1)c1nn(Cc2ccc(Br)cc2)cc1Br	0.987845
Cc1ccc(Sc2nccn3c(=O)n(CC(=O)NCCC4=CCCCC4)nc23)c(C)c1	0.000398732
O=C(O)C1CCC(C(=O)N2Cc3ccccc3-c3ccccc32)CC1	0.114024
COc1nc(C)cc(C)c1CNC(=O)NCC1CCOC1(C)C	0.98478
COc1ccc(S(=O)(=O)Nc2ccc(-c3nc4ccc(OC)cc4s3)cc2C)cc1	0.984605
CC(C)n1ccc(CNS(=O)(=O)N2CCCC2c2ccco2)n1	0.000980083
Cc1ccc(CCNc2ccc([N+](=O)[O-])cc2S(C)(=O)=O)cn1	0.710388
O=C1NC(=O)N(c2ccc(Br)cc2)C(=O)C1=C(NCc1ccccc1Cl)Nc1ccccc1Cl	0.188506
COc1ccc(NC(=O)C(CC(=O)O)Cc2ccc(C)cc2)cc1	0.000137029
CN(Cc1cc(-c2nn[nH]n2)cs1)C(=O)Cc1ccc(O)cn1	0.130237
CN(C)c1nc(CNC(=O)c2ccccc2Cl)nc(N(C)C)n1	0.70268
COCc1sccc1C(=O)Nc1cccc(C(O)C(F)(F)F)c1	1.31039e-05
Cc1cc(Cl)ccc1C(=O)N1CCC(c2nccn2C(C)C)CC1	0.535269
CC(=O)C1(O)CN(C(=O)OC(C)(C)C)C1	0.00202225
CC(NC(=O)Nc1cccc([N+](=O)[O-])c1)c1ccc2c(c1)OCCO2	0.720149
Cc1n[nH]c(C2CN(CCOc3ccccc3C#N)CCO2)n1	0.217686
Cc1ccc(-c2ocnc2C(=O)N2CC[C@H](N)C2)cc1	0.991588
COc1ccccc1N1CCN(Cc2nc(-c3ccc(SC)cc3)no2)CC1	0.569346
O=C(O)CCC1CCCN(c2cnc3cc(F)c(F)cc3n2)C1	0.578102
COCc1cc(NCc2ccc(C(=O)O)cc2)nc(C(C)(C)C)n1	0.134119
CC(C)(C(=O)N1CCC(NCC2CC2)CC1)c1ccccc1	0.138632
O=C1N=C(O)/C(=C/NN2CCCCC2)C(=O)N1c1cccc(Cl)c1	0.500755
CN(CCOc1ccc(Cl)cc1)C(=O)CC1(C(=O)O)CCC1	0.000105599
C=C(C)[C@@H]1C[C@@H](c2cc(S(=O)(=O)N(C)Cc3nc4ccccc4[nH]3)ccc2OC)[C@@H](CCCC)O[C@H]1c1cc(Oc2ccccc2)ccc1OCC(=O)O	0.0976018
CC1(CNC(=O)c2ccccc2CC#N)CCCCC1	0.0291487
O=C1CCCN1CC(=O)N1C[C@@H]2OCC(=O)N(CCc3ccccc3)[C@H]2C1	0.0139175
CCn1cc(C(=O)Nc2ccnnc2)c(C2CCOCC2)n1	0.249499
Cc1cc(C(=O)N2Cc3ccc(C#N)cc3C2)c(C)n1C1CCOC1	0.000122351
C#Cc1ccc(C(=O)N2C[C@@H](O)C[C@H](NC(=O)C(C(C)C)N3C(=O)c4ccncc4C3=O)C2)cc1	0.14312
Cc1cccc(COc2cccc(C=O)c2)c1	0.0761936
CCCNC(=O)CCC(=O)N[C@@H](C)CNc1ncc(C(=O)OC)cn1	0.042174
CCOC(=O)c1ccc(NC(=O)c2oc(C)nc2C)cc1	0.924857
Cc1c(C(=O)OCc2cc(F)cc3c2OC(c2ccccc2)OC3)sc2nc3n(c(=O)c12)CCC3	0.959562
CCNS(=O)(=O)c1cc(-c2c(CC)nn3c2NC(=O)CCC3=O)ccc1OC	0.00217222
CO[C@@H]1C[C@H](c2nnc(C)o2)N(C(=O)c2cccc(NC(C)C(C)C)c2C)C1	0.00748959
CCc1cc(=O)oc2cc(OCC(=O)N3C[C@H]4CCCN4C(=O)[C@@H]3C)ccc12	0.0686933
O=C(NCC1CCCN(C(=O)Cc2ccc([N+](=O)[O-])cc2)C1)C1CCCN1	0.968106
Cc1n[nH]c([C@@H]2C[C@H](NC(=O)CC(C)C)CN2C(=O)C2(c3ccccc3)CCCC2)n1	0.00334207
CC(Oc1ccc(Br)cc1)C(=O)N1CCCCC1C(=O)O	0.000983118
CCOC(=O)c1cccc(NC(=O)c2c(C)oc3ncnc(N4CCOCC4)c23)c1	0.000141946
CC(C)c1coc([C@@H]2CCCN2C(=O)C2CCCC2)n1	0.000779231
C#CCOc1ccc(C=C2N=C(c3ccc(NC(C)=O)cc3)OC2=O)cc1OC	0.999212
COc1ccc(OC)c(CN(CC(=O)NC(C)C)C2CC2)c1	0.702745
COc1ccc2c(c1)cc(C)c1nn(CC(=O)NC3CCCC3)c(=O)n12	0.263874
Cc1cccc(C(=O)N2CCCN(C(C)c3ccncc3)CC2)c1	0.970872
O=C1NC(=O)/C(=C\c2c(OCc3ccccc3)ccc3ccccc23)S1	0.977395
CCC1CCC2(CC1)NC(=O)N(CC(=O)NC(C)(CN)CC(C)C)C2=O	0.00337399
O=C(O)C1CCCCN1Cc1cccc(C2CC2)c1	0.271224
CCS(=O)(=O)N1CCN(Cc2ncc(C)c(OC)c2C)CC1	0.6896
CC(C)[C@H](NC(=O)Cc1ccccc1)C(=O)OCC(=O)c1ccc(Br)s1	0.000221405
CCN(C(=O)Cc1c(C)nn(C)c1C)c1ccncc1	0.00338777
O=C(NCCSC1CCOCC1)c1ccc2nsnc2c1	0.342116
O=S(=O)(CCNc1cccc(-n2cnc3ccccc32)n1)C1CCOCC1	0.951064
O=C(Nc1ccc(-n2nc(OCc3ccc(F)cc3)nc2-c2ccccc2F)cc1)c1cccc(F)c1	0.400834
COc1cccc2c(N/N=C/c3ccccc3)cc(C)nc12	0.998324
CC(C)(C)[C@H](NC(=O)CN)C(=O)O	0.813538
COc1ccccc1NC(=O)C(C)OC(=O)c1c(F)cccc1F	0.50522
CCCCOc1ccc(-c2cc(C(=O)NNC(=S)NCC)c3ccccc3n2)cc1	0.99872
CC(CN)C(=O)NCCS(=O)(=O)c1ccc(Cl)cc1	0.546542
Cc1noc(C)c1-c1cccc(CN2CCC(N)CC2)c1	0.976613
Cc1cc(NS(=O)(=O)c2ccc(NC(=O)C=Cc3ccc(C(C)C)cc3)cc2)nc(C)n1	0.792255
Clc1ccccc1COc1cccc(C=NNc2nc(N3CCCCC3)nc(N3CCCCC3)n2)c1	0.98493
CCc1ccccc1NC(=O)CN1N=NC2C(=O)N(c3ccc(F)cc3)C(=O)C21	0.0264092
O=C(c1ccc(N2CCOCC2)c([N+](=O)[O-])c1)N(Cc1ccccc1)c1ccccn1	0.988449
O=C(Nc1cccc(O)c1)c1ccc(Cl)c(S(=O)(=O)N2CCCCC2)c1	0.936587
O=S(=O)(NCc1ccc(-c2ccc(F)cc2)o1)c1ccc2c(c1)OCCCO2	0.0210354
COC(=O)c1c(C)nn(-c2nc3ccccc3c(=O)n2CCCOC(C)C)c1C	0.657636
CCOC(=O)c1c(-c2ccco2)csc1NC(=O)CC1(C(=O)O)CCCC1	0.000192059
COc1cccc(NC(=O)NCC(c2ccc(N(C)C)cc2)N(C)C)c1OC	0.738798
CCN(C(=O)Nc1ccc(F)cc1)c1ccc(Cl)cc1	0.367647
Cc1nnc(-c2cccc(C(=O)NC3CC4CCC3CC4C(=O)O)c2)o1	0.202748
CSc1ccccc1NC(=O)C1CCN(C(=O)c2nnn3c2COC(c2cccc(F)c2)C3)CC1	0.151906
O=C(CN1CCN(S(=O)(=O)c2cccs2)CC1)NCc1cccc(Cl)c1	0.00162883
CCCCN(CCCC)CN1C(=O)/C(=N\NC(=O)c2ccccn2)c2ccccc21	0.826294
CN(C)Cc1ccc(-c2noc(-c3cc(Cl)nc(N(C)C)c3)n2)cc1	0.980885
CCN(CC)Cc1ccccc1CNC(=O)c1cccnc1SC(F)F	0.0155141
Cc1ccc(C(=O)N2CCCCC2c2nc(O)c3c(n2)CCN(C(C)C)C3)c(=O)n1C	0.920394
CCCC(O)CN(Cc1cccc(C)c1)Cc1ccco1	0.984406
CCCS(=O)(=O)c1ccc(S(=O)(=O)N[C@H](C)C(=O)O)cc1	9.17006e-05
Cc1cc(Cl)ccc1NC(=O)c1cc2nc(N3CCCCC3)sc2s1	0.0660611
CCOc1ccc(C(=O)Nc2ccc3ccccc3c2)cc1Cl	0.97264
CCCCn1nc2n(CCC)c(=O)c3sccc3n2c1=O	4.78062e-05
Cc1[nH]cnc1CN1CCCC1c1nc(Cc2ccc(F)cc2)no1	0.786373
OCC1CCCN(Cc2cccc3c2OCO3)C1	0.995595
COCCN(C)CCNCC=Cc1ccccc1	0.996083
c1ccc(SCCCN2CCOCC2)cc1	0.145313
COc1ccccc1N1CCN(C(=O)c2ccccc2N)CC1	0.86427
O=C(NCCN1CCCS1(=O)=O)C(=O)Nc1ccc(OC(F)F)c(F)c1	0.00122843
O=C(Nc1ccc(Oc2cccnc2)cc1)N1CCC(Oc2cncc(Cl)n2)CC1	0.994391
COc1ccnc(N2C[C@H](O)[C@@H](N3CCCCC3)C2)n1	0.891682
O=C(CSc1nc2ccsc2c(=O)n1-c1ccccc1)Nc1ccc(F)cc1	0.00855908
CCCCOc1ccc(C2C(=C([O-])c3ccc4c(c3)OCCO4)C(=O)C(=O)N2CC[NH+](C)C)cc1OCC	0.988441
Cc1cc(C(F)(F)F)nc(CCNC(=O)c2cn(CCc3ccccc3)nn2)n1	0.00391585
Cc1cccc(NC(=O)c2cc3ccccc3oc2=Nc2ccc(C(F)(F)F)cc2)n1	0.973752
O=[N+]([O-])c1ccc(Sc2ccc(Cl)cc2)c(CO)c1	0.390544
Cc1cc(NCc2nnc(C3CC3)n2C)c2cc(F)ccc2n1	0.970412
CCS(=O)(=O)N(C)c1ccc2sc(C(=O)Nc3ccc(F)c(Cl)c3)cc2c1	0.000805932
CCn1cncc1CNC(=O)CC1COCCN1CC=Cc1ccccc1	0.434315
COCCN1C(=O)CCC[C@H]2CN(C(=O)c3cccn3C)CC[C@H]21	0.607187
O=C1c2ccccc2C(Nc2ccc3c(c2)OCCO3)N1Cc1ccc2c(c1)OCO2	0.590288
COc1ccc(/C=C2/SC(=S)N(CC(=O)Nc3ccc(C)cc3)C2=O)cc1OC	0.99063
CCCOc1ccc(C(=O)N2CCN(c3ccc(NC(=O)c4cccc(OC(C)C)c4)cc3Cl)CC2)cc1	0.988121
CC(C)(C)c1cc(C(F)(F)F)n2nc(C3CCCCN3S(C)(=O)=O)cc2n1	0.000935704
Cc1ncnc(N2CC3CC(C2)N3CC(=O)Nc2ccccc2C(F)(F)F)c1C	0.959832
Cc1ncsc1CN1CCC(F)(c2noc(-c3ccccc3)n2)C1	0.992339
Cc1ccc(SC(Sc2ccc(C)cc2)=C(Cl)/C=N/O)cc1	0.997094
CCOc1cccc(C2CC(c3ccc(C)cc3)=NC(c3cc(Br)ccc3OC)N2)c1O	0.96724
COC(=O)c1c(O)cn(-c2ccc(C)c(C)c2)c1C	0.241818
COCCC(=O)N1CCC(C(=O)Nc2ccc(-n3nc(C)cc3C)cc2)CC1	0.958547
CC[C@H](C)[C@@H]1NC(=O)N(Cc2ncc3c(n2)CCOC3)C1=O	0.0374109
COc1ccc(-n2c(=O)[nH]c3nc(N4CCC(N5CCCCC5)CC4)ncc3c2=O)cc1	0.576887
CC1CN(C(=S)Nc2ccc(Br)cc2)CC(C)O1	0.933031
CN(c1ccnc(N2CCOCC2)n1)C1CCN(c2nc3c(s2)CCCC3)CC1	0.847513
CCc1nc(N2CCN(C(=O)C(C)C)CC2)c2c(n1)c(C)nn2C	0.978849
CCN1CC(CN(C)C(=O)c2cn(-c3ccccc3)nn2)Oc2ccccc21	0.958674
c1ccc(Cc2noc(CN3CCC(CN4CCCCC4)C3)n2)cc1	0.990358
O=C(NC1CCCCCCC1)C(=O)c1ccc[nH]1	0.00241714
O=C(c1ccc(F)cc1F)N1CCc2nc(N3CCOCC3)nc(N3CCCCC3)c2C1	0.0166686
COCC(=O)Nc1ccc2c(c1)N(C)S(=O)(=O)N2C	0.00316826
CC(C)CC1CN(Cc2ccc(Cl)cc2)CCN1C(=O)c1cnc2nccnc2c1	0.93038
O=C(Nc1cccc2ncccc12)c1cnc2c(c1)CCCC2	0.997423
Cc1nc(O)c2c(n1)CC1CCC(C2)N1C(=O)C1C2CCCCC21	0.776955
COC(=O)C(CCSC)NC1CCN(c2ccc(NC(=O)Cc3cccc(F)c3)cc2)CC1	0.982355
Cc1cccc(C(=O)Nc2ccc(C)c(NC(=O)c3cccc(C)c3)c2)c1	0.740256
Cc1ccc(C(=O)N2CCC(c3nc(O)c4nnn(Cc5ccc(Cl)cc5Cl)c4n3)CC2)cc1	0.973758
COCCN(CCCOc1cccc(C)c1)CC(=O)O	0.180111
Cc1cccc(C)c1OCC(=O)N1CCCC1c1ccc2c(C)nn(-c3ccccn3)c2n1	0.0145773
CC(c1ccccc1)N1CC(C(=O)NNC(=O)C2(c3ccccc3)CCC2)CC1=O	8.57922e-06
Cc1nn(C)c(C)c1C(C)C(=O)NC(CN)c1ccc2ccccc2c1	1.50874e-05
Cn1c(Cn2ccnc2)nnc1C1CCN(c2ncnc3[nH]cnc23)CC1	0.941205
FC(F)(F)c1cccc(/N=N\c2cnc(-c3ccncc3)nc2-c2ccccc2)c1	0.523305
O=C(Cn1cccc1)NCc1ccnc(-c2cccs2)c1	0.960747
CC(C)c1ccc(NC(=O)Cn2cc(-c3ccc(F)cc3)[n+]3c2CCC3)cc1	0.0118333
O=C(CNC(=O)N1CCCC1)N1CC(c2ccc(Cl)cc2)C1	3.64978e-05
O=Cc1ccc(-c2ccco2)nc1	0.0322968
Cc1sc2[nH]c(CCC(=O)NCCCN)nc(=O)c2c1C	0.984601
CCC1CN(C(=O)CCN2C(=O)COc3ccccc32)CCO1	0.324902
O=C(O)c1ccc(NC(=O)c2cccnc2Cl)cc1	0.892608
COCc1nc(C)cc(N2CCCN(C(=O)C(C)(C)C)CC2)n1	0.915501
Cc1cc(C)cc(NC(=O)Cc2ccc(Cl)cc2Cl)c1	0.688552
Cc1nc2c(c(NCc3ccccc3-n3ccnc3)n1)CCNC2	0.997337
COc1cc(N2C[C@H]3C[C@@H](C2)[C@H](CCC(C)C)n2c3cccc2=O)nc(N)n1	0.542721
CCOc1ccc(C(=O)C(C)Sc2nnc(-c3ccncc3)n2-c2ccc(F)cc2)cc1	0.671466
CCCCC(CC)COC(=O)CSc1ccc(S(=O)(=O)N2CCOCC2)cc1[N+](=O)[O-]	0.00502182
O=C(O)C1CCN(CCOc2ccc(S(=O)(=O)N3CCOCC3)cc2)C1	0.0231943
O=C1N/C(=N/c2ccc(Br)cc2)SC1=Cc1ccc(O)cc1	0.866587
COc1ccccc1C(C)CC(=O)NC(C)(CC(=O)O)C(C)C	5.8555e-05
CC1CN(C(=O)C2CCN(c3ccc4c(c3)OCCO4)C2=O)CCC1C(=O)O	0.0866804
O=C(NC1CCCCC1)c1c(-c2ccccc2)nn2ncccc12	0.0014934
*/[V]=[SH]/P(I)/S(F)=[Y]/C([2H])([K])[V]	0.00144406
CC(NS(=O)(=O)c1cc(F)c(F)cc1F)c1ccc(F)cc1	0.000111249
COc1cccc(CN(C)C(=O)NCCCn2nc3n(c2=O)CCCC3)c1	0.000748936
COc1ccc(C(C)(C)CNC(=O)c2ccccc2N)cc1	0.655964
CCOCCCn1/c(=N/C(=O)c2cccc(F)c2)c(C#N)cc2c(=O)n3cccc(C)c3nc21	0.905286
COc1ccc(Cl)cc1C(=O)Nc1ccc(-c2nc3ccc(C)cc3s2)cc1	0.993739
CCCn1ncc(C(=O)N2CCC(C)(C(=O)O)C2)c1C1CC1	1.3172e-05
C=CC(=O)N(Cc1ccc(Br)c(F)c1)CC1OCCCO1	0.0141484
Cc1[nH]c2ccnn2c(=O)c1CC(=O)NC(CCC(=O)O)CC1CCCCC1	0.305464
CCOC(=O)N1CCN(C(=O)CSc2nnc(-c3cc(OC)ccc3OC)o2)CC1	0.948842
C/C(=N/NC(=O)C1CC1)c1ccc(NC(=O)c2ccc(Cl)cc2)cc1	0.930857
O=C1CN(C(=O)c2cc(F)ccc2F)CCCOc2cccc3c2OC[C@@]2(CN1)CN(C(=O)Cc1cccnc1)C[C@@H]32	0.00386274
NC(=O)c1ccc(C(=O)Nc2ccccc2N2CCCC2)cc1	0.785168
CCC(NC(=O)Cc1ccc(OC)c(F)c1)(C(=O)O)c1ccc(Cl)cc1	1.25656e-06
O=C(COC(=O)C(O)(c1ccccc1)c1ccccc1)c1ccc(OCc2ccccc2)cc1	0.941816
Cc1noc(C)c1CC(=O)N(C)Cc1cnn(-c2ccccc2)c1	0.0035321
COc1ccc(NC(=O)Cn2c(C)cc(-c3nnc(C4CCC4)o3)c2C)cc1	0.0107358
COc1ccc(C=CC(=O)NC(C)C(=O)N2CCN(C)CC2c2ccccc2)cc1	0.181462
CCn1nccc1CNC(=O)c1noc2c1CC(C)CC2	0.0100703
CCCOc1cccc(Cn2cc(C(=O)OC)ccc2=O)c1	0.000341386
O=C(Nc1nc(-c2cccc(O)c2)cs1)C1(c2ccc(Cl)cc2)CC1	0.021301
C=CC(=O)N[C@@H](Cc1ccc(O)cc1)C(=O)O	0.507442
CCCC[C@@H]1CN(Cc2ccc(N(C)C)nc2)C[C@H](C(C)C)O1	0.995806
O=c1c2cc(-c3cccnc3)nn2ccn1Cc1ccccn1	0.4528
O=C(NN=Cc1ccc(O)c(I)c1)c1cccnc1	0.980165
CCc1noc(C)c1C(=O)N1C[C@H]2COC[C@@H](C1)C(=O)N2	0.0940442
CCCOc1ccc(-c2nc(C(=O)N3CCNCC3)cs2)cc1	0.994823
CC(C)(C)c1nc(CC(=O)NC(C(=O)O)c2ccc(Cl)cc2)cs1	8.58803e-05
CC1CN(CC(=O)NCCN2CCOCC2)c2ccccc2S1	0.959873
O=C(Cn1cnc(S(=O)(=O)N2CCCC2)c1)N1CCc2ccccc21	0.00168322
CC(=O)NC1CCN(C(=O)c2coc(COc3cccc(F)c3)n2)CC1	0.947149
O=C(O)CN(C(=O)C1Cc2ccccc2S1)C1CC1	0.00631934
COc1ccc2cc(C(=O)N3CCCC(COc4ccncc4)C3)[nH]c2c1	0.968026
CCc1nc(C)c(C(=O)NCC(c2ccccn2)N(C)C)o1	0.967625
Cc1cc(CN(C)C2CC(C)(C)NC(C)(C)C2)c(C)n1-n1cnnc1	0.997396
O=C(c1cc(C(F)(F)F)c[nH]c1=O)N1CCCC(c2ccccn2)C1	0.963472
CCOCCCNCc1cc2c(C(C)(C)C)nn(-c3ccc(F)cc3)c2[nH]c1=O	0.170675
COc1cc(C)nc(NC2CCc3c(Cl)cccc32)n1	0.00140172
O=C(CN1CCCCCCOc2ccccc2Oc2ncccc2C1=O)N1CCC(CO)CC1	0.209071
CN1C(=O)c2ccc(C(=O)O)cc2C1=O	1.90896e-05
CCC(=O)Nc1ccccc1-c1n[nH]c(SCC(=O)Nc2ccc(Cl)c(Cl)c2)nc1=O	0.765443
CCCCC(=O)Nc1ccc(N2CCN(c3ccc(C(C)=O)cc3)CC2)c(C(=O)O)c1	0.0110304
O=C(NCCn1cncn1)N1CC(c2ccccc2)C2COCCC21	0.0790055
COc1ccc(C2CC(=O)C3=C(C2)Nc2nc(N)nn2C3c2ccc(Cl)cc2)cc1OC	0.00171524
Cc1ccc(C(NC(=O)c2ccnc(OC3CCOC3)c2)C(=O)O)cc1C	3.7703e-05
CC1CCCN(c2ccnc(N3CCCCC3)n2)C1CCN	0.883073
O=C(Cc1csc2nccn12)N1CCCCC1c1cn[nH]c1	0.00636132
Cc1noc(-c2ccc(SCC(=O)Nc3cc(Cl)ccc3C)nc2)n1	0.627765
Cc1ccccc1Cn1c(CN2CCC(C(=O)NCc3ccccc3Cl)CC2)cc2ccccc21	0.996002
O=C(NCCc1ccccc1)C1CCCN(C(=O)Nc2ccc(F)cc2)C1	0.0080685
CCOc1ccccc1N/C=C1/C(=O)N(c2ccccc2C)C(=O)c2ccccc21	0.887706
CC(C)CC(C)N(C)C(=O)c1nc(S(C)(=O)=O)n2ccccc12	0.00157185
O=C(Nc1cccc(CN2CCCCC2=O)c1)c1ccccc1	0.00348364
CC(=O)N1CCC2(CC1)CN(C(=O)Cc1ccc(N(C)C)cc1)Cc1ccccc12	0.0870808
Cc1c[nH]c(CN2CCCC(N(C)C)C2)c(C)c1=O	0.935625
CN(C)c1ccc(-c2noc(-c3cc4cc(Br)ccc4oc3=O)n2)cc1	0.869221
COc1ccc(/C=N/NC(=O)c2[nH]c3ccc(Br)cc3c2-c2ccccc2)c(C(=O)O)c1OC	0.799872
CC(C)n1nnc(CC(=O)N2CCC(C3CCN(c4cccc5c4C(=O)N(C4CCC(=O)NC4=O)C5=O)CC3)CC2)n1	0.482629
CC(COc1ccc2c(C)c(Cc3ccccc3)c(=O)oc2c1C)=NNc1ccc([N+](=O)[O-])cc1	0.964704
O=C(c1ccccc1F)N1CCC(C2(c3ccccn3)NC(=O)N(CCc3cccs3)C2=O)CC1	0.0209892
OC[C@H]1O[C@@H](Oc2ccc(-c3n[nH]cc3-c3ccc4c(c3)OCCO4)c(O)c2)[C@H](O)[C@@H](O)[C@@H]1O	0.877074
C=CCC(O)c1ccc(N(C)C)cc1	0.255162
COc1ccc(NC(=O)c2c(NC(=O)c3ccncc3)sc3c2CCCCC3)cc1	0.00168404
Cc1ccc(C(=O)N2CCOCC2C(=O)O)cc1Cl	0.000607445
COc1ccc(C(C)NC(=O)Nc2nnc(C3CC3)s2)cc1F	0.000169535
Cc1nn2c(nnc3c(=O)n(-c4ccccc4F)ccc32)c1-c1cccc(Cl)c1	0.303886
C/C(=N/NC(=O)COc1c(C)cc(Br)cc1C)c1ccc(Br)cc1	0.987946
Cc1ccc(NC(=O)Cc2cccs2)c(Br)c1	0.0254278
CC(C)[C@H](N)C(=O)Nc1ccc(OCc2nccn2C)cc1	0.835589
CC(C)C1CC(=O)N(Cc2cscc2Cl)C(=O)C1	0.000517355
CC(C)(C(=O)N1CC(c2ccnc(N)n2)C1)c1cc(F)cc(C#N)c1	8.78478e-06
CC(C)n1ncc2c1C(Nc1nnc(C(F)F)s1)CCC2	0.00047813
CC(C)(C)c1noc(-c2ccccc2C(=O)NCCc2cccc(C(=O)O)c2)n1	0.0849611
COc1ccc(C(CC(=O)NCc2cn3c(n2)SCC3)c2c(O)cc(C)oc2=O)c(OC)c1OC	0.994518
CCCn1c(SCC(=O)N(CC)C2CCS(=O)(=O)C2)nnc1-c1cccc(C)c1	9.3704e-05
CCOc1ccc(NC(=O)CN(C)c2cnn(-c3nc4ccccc4[nH]3)c(=O)c2Cl)cc1OCC	0.911877
CS(=O)(=O)N1CCCc2cc(C(=O)Nc3ccc(OCCN)cc3)ccc21	0.486018
CCOCC1CCCN(C(=O)CCc2ccc(C(=O)O)cc2)C1	0.000221313
Cc1ncc(CNCc2ccc(Br)cc2)n1C	0.825199
Cn1nccc1-c1cccc(-c2noc(-c3ccc(Cl)cc3)n2)c1	0.732001
CCc1nc(C#N)c(NCC(c2ccc(F)cc2F)N2CCCC2)o1	0.0550989
CC(C)c1cc(Oc2ccccc2)nc(SCc2ccccc2)n1	0.951378
COc1ccc(S(N)(=O)=O)cc1C(=O)OCc1nc2ccccc2o1	0.0153877
Cn1c(SCC(=O)Nc2ccccc2)nnc1-c1cccc(NC(=O)/C=C/c2ccccc2)c1	0.803336
Cc1ccc(S(=O)(=O)N(CC(O)CN(Cc2ccccc2)Cc2ccccc2)c2cccc([N+](=O)[O-])c2)cc1	0.79655
O=C(Nc1ccc(C(=O)N2CCc3cc(F)ccc3C2)c(Cl)c1)C1CC1	0.00683715
Cc1cc(C)cc(N(CCC(=O)O)S(=O)(=O)c2c[nH]cn2)c1	0.192009
Cc1cccc(C(=O)NCc2ccc(CN3CCN(C)CC3)cc2)c1O	0.866079
CNCCc1cc(C)nn1C	0.914992
COc1ccc(/C=N/Nc2nc(=O)c(Cc3ccc(OC)c(OC)c3)n[nH]2)cc1	0.842146
O=C1NC(=O)/C(=C\c2cccc(OCc3ccccc3F)c2)N1	0.99871
COc1ccc(CCNC(=O)CCCCCNc2nc(=S)[nH]c3ccccc23)cc1OC	0.940246
COc1ccc(N2CCN(C(=O)c3ccnc(-c4ccsc4)c3)CC2)cc1	0.991431
CC(OS(C)(=O)=O)C(C)(C)COS(C)(=O)=O	0.00485455
CC1=C(C(=O)OC(C)(C)C)C(c2ccc(OC(F)F)cc2)C2=C(CC(C)(C)CC2=O)N1	0.00133139
CCCNC(=O)CNC(=O)CC(C)C1CCCNC1	0.568017
COc1ccc(-c2noc3ncnc(N4CCC(C(=O)NCCc5ccccc5)CC4)c23)cc1	0.103862
COc1cc2nc(CSc3nnc(-c4ccccc4)[nH]3)[nH]c(=O)c2cc1OC	0.989389
CN(C(=O)NC1CCOC(C2CC2)C1)[C@@H]1COC[C@H]1O	0.000439163
O=[N+]([O-])c1ccc(CO)c(-c2ccc(CN3CCNCC3)cc2)c1	0.936201
COc1ccc2cc(C(=O)N(C)C3CCNCC3)cnc2c1	0.998604
COc1cc(/C=N/NC(=O)CCCCCC(=O)N/N=C/c2cc(Br)c(O)c(OC)c2)cc(Br)c1O	0.993405
O=C(Cn1cccn1)N1CCCCC1c1nnc(-c2ccncc2)o1	0.00210422
O=C(NCc1cccc(Br)c1)c1ccc2c(c1)ncn2CCN1CCCC1	0.0646494
CC1CN(c2ccc(Cl)cc2)c2nc3c(c(=O)n(CCc4ccccc4)c(=O)n3C)n2C1	0.00868034
Cc1ccc(C(=O)NCCC(=O)NCc2ccco2)cc1	0.024779
Cc1ccc(S(=O)(=O)NCCOCCO)c2ccccc12	0.0258939
O=C(Cn1cnc2sccc2c1=O)N1C[C@H]2COC[C@H]2C1	0.513761
CCOC1CC2(CCN(Cc3c(C)nn(Cc4ccc(OC)cc4)c3C)C2)C1	0.292177
CC(C(=O)NC(CCC(C)(C)C)C(=O)O)n1cccn1	0.00254156
Brc1cn(C2CC2)c2ncnc(NCC3(n4ccnn4)CC3)c12	0.237794
NC(=S)N1N=C(c2ccccc2)/C(=N\Nc2cccc3ccccc23)C1=O	0.995607
O=C(CCn1cccn1)N1CCC(CC2CC2)(c2noc(C3CCOCC3)n2)CC1	0.781833
Cc1cc(C(=O)N2CCC(C3CCCN3)CC2)c(C)n1C(C)C	0.846498
Cc1cncc(C(=O)NCC2CCCN(c3ncccc3F)C2)c1	0.993504
C=CC(=O)NCC1CN(C(=O)c2nccnc2C(=O)N2CCOCC2)CCC1C	0.769383
CC(C)c1noc(C(C)Nc2ccc3c(c2)OCCO3)n1	0.95664
CNC(=O)c1cccc(-c2csc(C)n2)c1	0.151171
C=CC(=O)N[C@@H](C)c1ccc(C(F)(F)F)nc1	5.9645e-05
CN1C(=O)C(=Cc2ccc(-c3ccc(C#N)cc3)o2)SC1=Nc1ccc(N2CCOCC2)cc1	0.48781
O=C(CN(CCCO)CC(F)(F)F)Nc1ccc([N+](=O)[O-])cc1	0.291921
O=C(OCc1nc(-c2ccc3c(c2)OCO3)no1)c1ccc(Cl)cc1	0.74989
CN1CCC2(CC1)CN(C(=O)C1(Nc3ccccc3)CCCC1)CCN2C	0.98668
Cc1nn(C)c2nc(N3CCC(Cc4cnn(C)c4)C3)cc(Cl)c12	0.929706
Cn1nnc2cc(CNC3CCCC(C)(C)C3)ccc21	0.99731
CC(N)C1CCN(CC2CCC(C)(C)CC2)CC1	0.990902
Cc1ccccc1CS(=O)(=O)NC(=O)C1Cc2ccccc2CO1	0.0571208
CCOc1cccc(C(=O)N(Cc2cnn(C)c2)C(C)C)c1	0.667476
CC(=O)NC(CC(=O)NC(c1nc2ccccc2[nH]1)C(C)C)c1ccc(C)cc1	0.00564622
CC(C)(C)NCCNCc1ccccc1[N+](=O)[O-]	0.99308
Fc1ccc(-c2nnc(S)n2-c2ccccc2)cc1F	0.00384751
CCC(C)NC(=O)c1nn(-c2cccc(F)c2)c(=O)n(Cc2cccc(Cl)c2)c1=O	1.20392e-05
CCCc1noc(CN2CCN(CCOc3ccccc3)CC2)n1	0.996076
O=C(N[C@@H]1CC[C@H]2CCOc3ccccc3C(=O)N3CCN(Cc4cccc(Cl)c4)C[C@H]3C(=O)NC[C@H]1O2)C1CCOCC1	0.549789
Cc1nn(C)c(N2CCOCC2)c1CNC1CC(C)(C)NC(C)(C)C1	0.997016
CCS(=O)c1ccccc1NC(=O)c1cc(-c2ccc3ccccc3c2)on1	0.0563426
CCCCN(CCCC)CC(O)Cn1c2ccccc2c(=O)c2ccccc21	0.993038
Cc1cc(C)n(-c2ccc(-c3noc(CN4CCCC4C)n3)cn2)n1	0.989091
COc1ccc(S(=O)(=O)NCCCn2cccn2)cc1Cl	0.0163401
COc1ccccc1NC(=S)N(Cc1ccccc1)Cc1cccn1Cc1ccccc1Cl	0.0448611
COc1cccc(OC)c1CC(=O)NCC(N1CCNCC1)C(F)(F)F	0.45203
COc1ccc(OC)c2[nH]c(C(=O)NCCN)cc12	0.928314
CC(=O)N1CCC(C)(C(=O)Nc2cccc(Oc3ccccc3)n2)C1	0.784011
O=C(NCCCO)C(=O)NC1CCCCCC1	0.00758528
C=CCN(Cc1ccc(OC)cc1)C(=O)Nc1ccccc1	0.0252874
c1ccc(CCN2CN(CCN3CCOCC3)c3nc4ccccc4n3C2)cc1	0.993268
CC(C)Sc1nnc(NC(=O)c2ccc3[nH]cnc3c2)s1	0.895261
CCCCCC/C(=N\NC(=O)c1cccc(C)c1O)c1ccccc1	0.504973
CCN(Cc1cn(CC)nc1C)C(=O)c1c(C(=O)O)cnn1C	0.000999203
CC1CCn2c(nnc2C(C)NC(=O)c2cnc3ncc(Cl)cn23)C1	0.0091183
N#Cc1ccc(N2CC3CN(C(=O)c4ccncc4F)CC3C2)nc1	0.71
CCc1oc(C(=O)NC[C@@H]2CCO[C@H]2c2cnn(C)c2)cc1C(=O)[O-]	0.0481432
CS(=O)(=O)NCc1ccc(B(O)O)cc1	2.65761e-05
CC1CN(C(=O)c2cc3c(s2)CCCCC3)CC1N	0.0991012
O=C(NCc1cccs1)c1ccn(-c2ccccc2)n1	0.000874554
Cc1nc(C(=O)NC2CCCOC2)ccc1C(=O)O	0.539582
Cc1ccc(S(=O)(=O)CCCn2nc3scc(C)n3c2=O)cc1	0.000744068
COc1ccc(S(=O)(=O)N2CCC(C(=O)NCC3CCCN3)CC2)cc1	0.601093
COC(C)(C)C(=O)N1CCCNC(=O)c2csc(n2)[C@H](Cc2ccccc2)NC(=O)c2csc(n2)[C@H](CC(C)C)NC(=O)CCC1	0.650092
CCCc1cc(=O)c2c(=O)n(-c3nc4ccccc4s3)[nH]c2[nH]1	0.993662
CC(C(=O)O)N(C)S(=O)(=O)c1ccc2nc(C(C)(C)C)sc2c1	0.0901598
COCc1nccc(NC(=O)N2CCN(c3ncc(Cl)cc3Cl)CC2)n1	0.98349
Cc1cc(C#N)cc(N2CCCC2(C)CCCO)n1	0.0782332
Cc1oc2c(cc(O)c3c2c(-c2ccccc2)nn3-c2ccccc2)c1C(=O)c1ccccc1	0.198433
CCOC(=O)c1c(NC(=O)Nc2ccccc2)sc2c1CC(C)(C)N(C)C2	0.699931
CO[C@@H]1CC[C@H](C(=O)NCCCn2ccnc2)C[C@H]1NC(=O)Cc1cccnc1	0.943194
CCOC(=O)C1=C(c2ccccc2)N=c2s/c(=C/c3ccc(OC)c(C)c3)c(=O)n2C1c1c(OC)ccc2ccccc12	0.285515
Cc1ncnc(N2CCC(C(N)=O)CC2)c1C	0.835013
Cc1cn2c(=O)c(C(=O)Nc3ccccc3F)cnc2s1	0.727378
CCC[C@H]1[C@H]2C[C@H](CN(CCCc3cnc4ncnn4c3)C2)[C@@H]2CCCC(=O)N21	0.891146
Cc1ccc(NC(=O)C2CC(=O)N(c3ccc(Cl)c(Cl)c3)C2)c(C)c1	0.007341
CC(C)C[C@@H](NC(=O)C1CCN(S(=O)(=O)c2cccnc2)CC1)C(=O)O	0.0425136
O=C(CN1CCOCC1)NCC(O)CNc1nc2ccccc2s1	0.994692
CC(=O)Nc1cccc(C(=O)OC(C(=O)NC2CC2)c2ccccc2)c1	0.00869665
Cc1ccc(C(C)C)cc1OCC(=O)N/N=C1\C(=O)Nc2c(Br)cc(Br)cc21	0.0123688
c1ccc(C23CCCCC2CN3)cc1	0.0509683
CS(=O)(=O)N1CCN(c2ccccc2NC(=O)Cn2cnc3ccccc32)CC1	0.00348242
COc1ccccc1/N=C(\NCc1cccnc1)NC(=O)c1ccccc1	0.981079
CC(c1ccccc1)N1CCC(NC(=O)NCc2cscn2)C1	0.189346
O=c1c(/C=N/Cc2cccnc2)c(NCc2cccnc2)nc2ccccn12	0.99922
COc1ccc(-c2ccc3[nH]nc(N)c3c2)c(-n2cccn2)c1	0.0129245
O=C(COC(=O)c1ccccc1OC(F)F)Nc1cccc(S(=O)(=O)N=C2CCCN2)c1	0.00066307
C#CCOc1c(Cl)cc(/C=N/NC(=O)c2cc3ccccc3o2)cc1Cl	0.998285
Cc1ccc(C)c(-c2cc3c(=O)n(CC(=O)NCC4CCCO4)ccn3n2)c1	9.68807e-05
COc1ccc(CC(=O)OCC(=O)NCc2ccc(F)cc2)cc1	0.000185152
O=C(/C=C/c1ccco1)NCC(=O)N/N=C1\C(O)=Nc2ccc([N+](=O)[O-])cc21	0.363945
N#C/C(=C\c1ccc(-c2cccc(C(F)(F)F)c2)o1)c1nc(-c2ccc(F)cc2)cs1	0.0863987
Cn1cnnc1S(=O)(=O)C1CCN(C(=O)c2cccs2)CC1	0.137755
C=C(C)[C@H]1C[C@H](c2ccccc2Cl)[C@H](C)O[C@@H]1c1cc(Oc2ccccc2)ccc1OCC(=O)O	0.843677
COc1cc(C=NNC(=O)c2ccccc2C)ccc1OCc1ccccc1	0.998344
Cc1cc(C)n(Cc2nc3c4cnn(C)c4ncn3n2)n1	0.528662
CCC1CCCCC1NC(=O)NC1CCCC(N)C1	0.422073
O=C(Nc1cccc(Oc2ccncc2)c1)[C@H]1CCCCN1	0.513551
CC(C)NC(=O)c1ccccc1NC(=O)CSc1ccc(Cl)cc1	0.000182949
NC(CC(=O)NC1CCCCC1)=NOCc1cccc(F)c1	0.113699
COc1cc(CNC2COc3c(F)cc(F)cc3C2)ccc1C#N	0.00609849
Cc1ccc2cc(C[C@@H](NC(=O)OCC3c4ccccc4-c4ccccc43)C(=O)O)ccc2n1	0.532006
CCc1nc2ccccc2c(=O)n1CC(=O)Nc1ccc(F)c(Cl)c1	0.953661
CCn1cc(CNc2ccn(C)n2)cn1	0.987849
C[C@H](CC(=O)C[C@@H](C)C1C[C@H](O)[C@@]2(C)C3=C(C(=O)C[C@]12C)[C@@]1(C)CC[C@H](O)C(C)(C)C1CC3)C(=O)O	0.149316
COc1cccc(C2Cn3nc(C(=O)N4CCC(C(=O)N5CCOCC5)CC4)cc3CO2)c1	0.133135
CCOc1ccc(S(=O)(=O)NCC2(c3ccc(F)cc3)CC2)cc1C	0.000195981
COCC(C)Nc1ccc2c(c1)nc(C)n2C	0.728358
CCC(=O)N1CCCc2ccccc2C1	0.00131567
CCOc1ccc(NC2c3ccccc3C(=O)N2c2ccc(Cl)cn2)cc1	0.989391
CCOC(=O)C1(Cc2cccc(Cl)c2)CCCN(C(=O)CCn2nc(C)cc2C)C1	0.000348356
CCC(C)(C)NC(=O)C(C)n1cc(-c2cncc(Br)c2C)nn1	6.79219e-06
O=C(CCn1c(=O)[nH]c(=O)c2ccccc21)NCc1ccc2c(c1)OCO2	0.000351711
Cc1[nH]c2ccccc2c(=O)c1OCc1cccc(C(=O)NCc2ccco2)c1	0.946532
CCC1(CO)CCCN(C(=O)NCCc2ccc(F)cc2)C1	3.05223e-05
COC(=O)CC1=NN(c2nc3ccccc3s2)C(=O)C1=C(C)NC(C)(C)C	0.619828
COc1ccc(-c2c[n+](-c3ccc(Cl)cc3)c3n2CCCCC3)cc1	0.995395
CCn1nc(C)cc1C(=O)N1CCC(Oc2ccc(F)cc2)CC1	0.0376768
O=C(NCC(c1ccco1)n1cccn1)c1ccoc1	0.00913087
CCCCn1c(N)c(N(CC)C(=O)CCc2c(C)[nH]c(=O)c(C#N)c2C)c(=O)[nH]c1=O	0.164828
NC(=O)C(c1ccc(Cl)cc1)N1CCN(c2ccnc(-c3ccccc3)n2)CC1	0.00168747
COc1ccc(/C(=C/c2cnn(C)c2)[N+](=O)[O-])cc1	0.976924
CCN(Cc1cnn(C)c1)S(=O)(=O)c1ccc(SC(F)(F)F)cc1	4.71752e-05
COc1ccc(CCNC(=O)CSc2nnc(-c3ccccc3)c(-c3ccccc3)n2)cc1	0.179519
COCCN1CCN(Cc2ccccc2-n2cccn2)CC1=O	0.432311
CN=C(NCCCOCc1ccco1)NC1CC1C	0.761525
Cc1nc(O)cc(CS(=O)(=O)C2CCC2)n1	0.716018
COc1cccc(C(=O)N2CC3CN(c4nc(C)nc5c4CCC5)CC3C2)c1OC	0.993709
O=C(COc1ccc(Cl)cc1Cl)NCCSCc1ccccc1Cl	0.0245664
Cc1cc(C)c(N=c2scc(C)n2Cc2ccccc2)c(C)c1	0.0284199
CCN(CC)c1ccc2cc(C(=O)Nc3cc(Cl)cc(Cl)c3)c(=N)oc2c1	0.786886
CC(C)CCNC(=O)c1ncn2c1COC(c1ccc(C(C)C)cc1)C2	0.408343
CC1(c2ccc([N+](=O)[O-])cc2)NC(=O)N(CC(=O)O)C1=O	0.00225628
O=C(O)C1CCC(C(F)(F)F)CN1C(=O)OCc1ccccc1	6.88474e-05
CN(Cc1cnccn1)C(=O)c1cc(Br)cnc1C1CC1	0.370545
NC(=O)C1CCCCc2c1[nH]c1ccc(Cl)cc21	0.00254802
CCCOc1ccc(C=NNC(=O)COc2ccc([N+](=O)[O-])cc2)c(OCCC)c1	0.948126
Cc1ccc(N2C(=O)C(=O)C(c3ccccc3)=C2c2ccccc2)cc1	0.812901
CC(C)(Cc1ccc(F)cc1F)NC(=O)c1ccc(-c2cn[nH]c2)cc1	0.000108203
CCc1cc(C(=O)NCC2COc3cc(OC)ccc3C2)cc(=O)[nH]1	0.965068
Cc1ccccc1C=C1SC(=S)N(c2cccc(C(F)(F)F)c2)C1=O	0.935263
CCC(O)(C(=O)NCC(NC(=O)c1cccnc1)c1ccc2ccccc2c1)c1ccccc1	0.000129523
O=C(COC(=O)c1ccc(Cl)cc1Cl)Nc1ccc(Cl)cc1F	0.106242
COc1cc(F)c(NC(=O)c2ccc(Cl)cc2)cc1OC	0.887092
COCC(NC(=O)c1oc(CO)cc1C)c1cccc(Cl)c1	1.58351e-05
O=C(O)C1CCN(S(=O)(=O)c2ccc(N3CCCC3=O)cc2)C1	0.0158347
O=C1CC(N2CCN(c3ccc(C(F)(F)F)cc3[N+](=O)[O-])CC2)C(=O)N1c1ccccc1	0.195901
CCCC(NC(=O)c1csc(-c2cccs2)n1)C(=O)O	0.000906718
Cc1noc(C)c1-c1nc2c(s1)CCC(C(=O)N1C[C@H]3CC[C@@H](C1)[C@H]3N)C2	0.518363
COc1ccc(N2CCN(C(CNS(=O)(=O)c3cc(F)ccc3F)c3ccco3)CC2)cc1	0.00150411
O=S(=O)(NCC(O)(c1ccsc1)c1cccs1)c1ccc2c(c1)CCO2	0.0125933
C[C@@H]1C(=O)N2CCC[C@H]2CN1Cc1cnc(NCc2ccccc2)nc1	0.979741
CC(C)NC(=O)CCNCC(C)c1ccccc1	0.233241
C/C(=N\NC(=O)c1c(C)nnn1-c1nonc1N)c1ccccc1Cl	0.465736
O=C(NCc1ccco1)/C(=C/c1ccco1)NC(=O)c1ccco1	0.000735805
Cc1ccc(/N=C/N(C)c2c([N+](=O)[O-])cc([N+](=O)[O-])cc2[N+](=O)[O-])cc1	0.820671
COc1ccc(-c2nc(C(=O)Nc3ccn(C)n3)cs2)cc1OC	0.992779
CCOC(=O)c1cccc(NC(=O)C2=NN(c3ccccc3)C(=O)CC2)c1	0.0115314
O=C(Nc1c[nH]nc1-c1ccccn1)c1ccc(C2CC2(F)F)cc1	0.00364636
Cc1ccc(C(CN2CCOCC2)NC(=O)CC(C)N)cc1	0.947699
COC(=O)N1CCc2ccc(F)cc2C1C(=O)NCc1c(F)cccc1F	3.14624e-06
CC(O)c1cc2n(n1)CCCN(C(=O)CCN1CCOCC1)C2	0.854185
COc1cc(C#N)ccc1OCC(=O)Nc1ccc(C)cc1Br	0.374155
CC(=O)Nc1cnc2c(c1)CC(N)CC2	0.99832
Cc1[nH]c(=O)c(C(=O)N2CCC(C(O)CC(C)C)CC2)c(C)c1Cl	0.988511
CC(=O)NCCC(=O)NC(c1cnc2ccccc2c1)[C@H]1C[C@@H](O)C1	0.997674
CC(=O)c1cnc(N2CCN(C(=O)c3ccco3)CC2)nc1C	0.954692
Cc1c(Cl)cccc1NC(=O)CN1CCC(CC(F)(F)F)C1	0.0139261
CC(=NNC(=O)c1cc([N+](=O)[O-])cc([N+](=O)[O-])c1)C1CC1	0.915804
O=C(O)C1C2C=CC(C2)C1C(=O)NCc1ccc(-c2cccs2)s1	0.00567086
CCC1(Nc2nc(N(C)C)cc(C(F)(F)F)n2)CCOC1	0.00244369
CCCOC(=O)c1ccc(NC(=O)c2cc(-c3cccc(Br)c3)nc3ccccc23)cc1	0.826239
Cc1cccc2c(=O)cc(C(=O)NNC(=O)c3ccc(Cl)cc3)oc12	0.130734
CCc1cc2c(C)cc(=O)oc2c2ccoc12	0.901415
O=C(NCC(O)c1csc2ccccc12)Nc1ccns1	0.729991
Cc1ncsc1CNc1ncccc1I	0.868651
COc1ccc(C(=O)N2CCCC2c2c(C)n[nH]c2C)cn1	0.808635
O=c1[nH]c2ccccc2nc1Cn1cnc2sccc2c1=O	0.985719
Cc1nnc(SC(C)c2nc3scc(-c4cccs4)c3c(=O)[nH]2)n1C1CCCCC1	0.997829
CN1CC2(CCN(C(=O)NCCc3ccccc3)CC2)CC1C(=O)NCc1ccccn1	0.00481832
O=C(Cn1nnc(-c2cccc(C(F)(F)F)c2)n1)c1ccc(F)c(F)c1	0.000209801
O=C(Nc1ccc(N2CCOCC2)c(Cl)c1)c1sc2cc(Cl)ccc2c1Cl	0.827366
O=C(NCC1CCCN(C(=O)C2CCc3ccccc32)C1)C1CCCN1	0.0966343
Cc1nccnc1[C@H](C)NC(=O)c1cc(=O)n(C)cn1	0.926633
N#CC(C(=O)NCc1ccco1)=C1SC(Cc2ccc(Cl)c(Cl)c2)C(=O)N1c1ccc(F)cc1	0.000118147
Cc1ccccc1C1c2[nH]c3ccccc3c2CCN1C(=O)CSc1ccccn1	0.997337
COc1ccccc1C(O)CNC(=O)Nc1ccccc1N1CCCC1=O	0.0609583
CC1C(C)S(=O)CCN1C(=O)NC1CCCC(C(F)(F)F)C1	3.53292e-05
CC(CN(C)S(=O)(=O)Cc1ccc(Cl)cc1Br)C(=O)O	0.000882397
COc1ccc(NC(=O)C2CC(=O)N=C(Nc3ccc(C)cc3C)N2)cc1	0.00932062
N#CCc1ccccc1C(=O)NCCC1CCCCO1	0.0441804
Cc1cc(NC2CCC(NC(=O)c3ccc4[nH]ccc4n3)CC2)ncn1	0.998779
CN(CCO)c1ccc(C(=O)N2CCC(C3CCCCC3)C2)cc1	0.325989
COc1ccc(-c2cc(-c3ccccc3)nc(SCCN3CCOCC3)c2C#N)cc1	0.840928
CCN(Cc1ccc2ccccc2c1)C(=O)[C@H]1CCCNC1	0.998864
COc1ccc(-c2cccc(C3CCCN(C(=O)Cc4ccccn4)C3)n2)cc1	0.9956
COC(=O)c1ccc2c(c1)NC(=O)C2=C(Nc1ccc(N(C)C(C)=O)cc1)c1ccccc1	0.941688
Cc1ccccc1CCNC(=O)c1cc2c(C)nn(Cc3ccc(F)cc3)c2s1	0.000341137
O=C1CSC2(C(=O)N(Cc3cccc(C(F)(F)F)c3)c3ccccc32)N1c1ccc(F)c(F)c1	5.95058e-05
CCOC(=O)c1c(N=c2oc3ccccc3cc2-c2nc3ccccc3[nH]2)sc2c1CCCC2	0.0733985
O=C1N/C(=N/c2ccccc2)S/C1=C\c1ccc2c(c1)OCO2	0.866994
Cn1nccc1CC(NCc1cccc2ccsc12)C(=O)O	0.585409
CCc1cc(N2CCC(Nc3ncc(Cl)cc3F)CC2)ncn1	0.62884
O=C(Nc1ccc(-n2ncc3ccccc32)cc1)c1cnsn1	0.905991
COc1ccc(CCC(=O)NCC(C)(C)C(=O)O)c(OC)c1OC	0.778779
CCC(CC)c1nc(-c2ccc3c(c2)nc(C)c(=O)n3CC)n(-c2ccnc3cccnc23)n1	0.918214
O=C(NCCc1ccccc1)C1CCN(Cc2cncn2C2CC2)CC1	0.914422
CC1CCc2nnc(CCNC(=O)CNC(=O)N(C)Cc3ccco3)n2C1	0.00598846
O=C(c1cscn1)N1CCC(Cc2cccc3cccnc23)C1	0.655977
CC(C)CN(CC(=O)N(CCc1c[nH]c2ccccc12)Cc1ccc(C(C)(C)C)cc1)C(=O)c1ccc(Cl)cc1	0.00202853
CC(C)(C)OC(=O)c1cc(C(=O)NCC2(C(=O)N3CCN(c4ccccc4)C(=O)C3)CC=CC2)n[nH]1	0.00455401
CC(C)(C)OC(=O)Nc1cccc(-c2ncc(C=O)s2)c1	0.00108275
CCn1ncc(CN(C)C(=O)C2CCN(C(=O)c3ncn4c3COC(c3ccc(OC)c(OC)c3)C4)CC2)c1C	0.464675
CC(Nc1cc(N2CCCC2=O)ccc1F)c1cnccn1	0.599574
CN(C)c1cccc2c(S(=O)(=O)NC3CCC3)cccc12	0.00281117
NN1CC(=O)NC1=O	0.0130706
COc1cccc(C(CNC(=O)c2ccc(C)[nH]c2=O)N(C)C)c1	0.97119
CCNC(=O)CNC(=O)CSc1nnnn1Cc1cccs1	0.121645
CC(C)c1noc(CSc2ccccn2)n1	0.968593
COc1cc(C=CC(=O)n2c(SC)nc3ccccc32)cc(OC)c1OC	0.998
NC(=O)CC(NC(=O)CNc1ccccc1)C1CCOCC1	0.648543
COc1ccccc1OCc1ccc(C(=O)N2CCCC2c2nc3ccccc3[nH]2)o1	0.720508
O=[N+]([O-])c1cc(S(=O)(=O)N2CCOCC2)ccc1OCCOc1ccc(Cl)cc1	0.429186
CCN(C(=O)c1csc(NC(C)=O)n1)c1ccccc1	0.992891
CCNC(=O)C1(c2ccc(Cl)cc2)CC1	5.41098e-06
COc1ccc(CNC(=O)CN2C(=O)C(c3ccccc3)=NC23CCCC3)cc1OC	0.0364583
CCCOC(=O)c1csc(Br)c1	4.99855e-05
CC1(C)C2CCC1(CS(=O)(=O)N1CCN(c3nc(-c4ccccc4)cs3)CC1)C(=O)C2	0.0776289
O=C(NCCCO)C(F)(F)C(F)(F)C(F)(F)C(F)(F)C(F)(F)C(F)(F)F	5.69687e-05
O=C(O)CSc1nc(-c2ccccc2)cs1	0.00440099
COc1cc(Cl)c(C)cc1NC(=O)CCNC(=O)CC1(C(=O)O)CCC1	8.45917e-05
O=C(Nc1c2c(nn1-c1cccc(Cl)c1)CS(=O)C2)c1ccc(S(=O)(=O)N2CCCC2)cc1	0.00434445
CCOC(=O)C=CC(=O)Nc1nc(-c2ccc3ccccc3c2)cs1	0.00873377
O=C(O)c1ccc(CN2CC[C@H](O)[C@](CCCc3ccccc3)(C(=O)O)C2)s1	0.00048785
C=CCn1c(-c2ccccc2)cs/c1=N/N=C/c1cc(OC)c(OC)c(OC)c1	0.997388
CCOc1ccccc1C(=O)Nc1c2c(nn1-c1ccc([N+](=O)[O-])cc1)CSC2	0.00226298
O=[N+]([O-])c1cccnc1N1CCN(c2ccc(F)cc2)CC1	0.824724
O=C1C(=O)N(Cc2ccco2)C(c2cccc(O)c2)/C1=C(\O)c1ccc(Cl)cc1	0.63234
Cc1c(Cl)cccc1NC(=O)c1ccncc1	0.964589
Cc1n[nH]cc1C1CCN(C(=O)c2cc3ccncc3c(O)n2)CC1	0.977711
C#CCOc1ccc(CN2CCN(c3ccccc3C(O)c3ccccn3)CC2)cc1OC	0.976929
CC(C)CCN1CC(=O)NCCCCCOc2cccc(C(=O)N3CCCC3CO)c2C1	0.116361
CNS(=O)(=O)CC(=O)NC1CCCCC1CNc1ccnc(C)n1	0.255752
COc1ccc(-n2nnc3c(=O)n(CC(=O)Nc4ccc(C)cc4)cnc32)cc1	0.419182
CCOC(=O)C1=C(CSc2nc3ccccc3n2CCC#N)NC(=O)NC1c1cccs1	0.00305208
Cc1csc(CN2CC3(CC(Oc4ncccc4F)CS3)C2)n1	0.994428
COc1ccc(C(F)(F)F)cc1NS(=O)(=O)c1cc(C(F)(F)F)ccc1Cl	8.85947e-05
CCc1ccc(NC(=O)C2CN(c3cc(-n4cccn4)ncn3)C2)cc1	0.0177753
CCOc1ccc(-c2cc(OC)c3c(C)oc(C)c3c(=Nc3ccc(Nc4ccccc4)cc3)c2)cc1	0.998925
CC(c1nnnn1C(C)(C)C)N(Cc1cccnc1)Cc1ccccc1Cl	0.987264
Cc1ccc(OC(=O)CCCCCCCCCCC(=O)Oc2ccc(C)cc2)cc1	0.97888
C=CC(=O)N[C@H]1[C@H]2CCC[C@H]2[C@H]1OCc1ccccc1	0.299626
COCCN(CC(=O)N1CCCN(c2ccc(-c3ccccc3Cl)nn2)CC1)C(=O)c1ccccc1	0.891011
CCOc1ccc(NC(=O)c2nc(SC(C)C)ncc2Cl)cc1	0.00196743
COc1ccc(CCNC(=O)CCCCCn2c(SCc3ccccc3F)nc3cc4c(cc3c2=O)OCO4)cc1OC	0.913896
Cc1nnc2c(NCc3ccccc3COC(C)C)nccn12	0.373089
CC(C)CCC(=O)NCC(=O)N1CCCNCC1	0.750701
FC(F)(F)c1ccc(-c2csc(-c3ccc(-c4csnn4)cc3)n2)cc1	0.947288
CCN1CCCCCN(C(=O)CCC2CCCCC2)[C@@H](CC(C)C)COc2ccccc2C1=O	0.119677
CCCn1c(=O)n(CCC(=O)N2CCC(C(=O)O)C2)c2ccccc21	0.00359324
O=C([O-])CCCC(=O)c1c[nH]c2ccccc12	0.584575
COCC(Nc1cc(N2CCSCC2)ncn1)c1ccc(C)o1	0.0725377
CC1CCN(Cc2ccc(NC(=O)CN)cc2)CC1	0.986983
CCOC(=O)CN(CC(=O)OCC)C(=O)c1cc(C)c(OC)c(C)c1	0.962608
CCN(CC)S(=O)(=O)c1ccc(N2CC(C(=O)Nc3cccc4ncccc34)CC2=O)cc1	0.0514586
Cc1nc(-c2cccnc2)sc1-c1ccc(SCc2ccc(Cl)cc2)nn1	0.897578
CC(C)(C)OC(=O)N1CCC(c2c(C(=O)N3CCN(c4cccc(Cl)c4)CC3)cnn2-c2ccccc2Cl)CC1	0.589037
Cc1ccc2c(c1)O[C@@](C)(CCC(=O)O)[C@@H]1CC[C@@H](CCCN)O[C@@H]21	0.893338
Cc1nn(-c2ccccc2)c(C)c1S(=O)(=O)N[C@@H]1CC[C@](F)(CN)C1	0.000163287
Cc1c(C(=O)NC2CCC23CN(C(=O)c2cnc[nH]2)C3)[nH]c(=O)c2ccccc12	0.00350842
CC1=C(C#N)C(=O)N(Cc2ccccc2)C(=O)/C1=C\NC(=O)Nc1ccc(SC#N)cc1	0.483897
CCCCc1nn2c(=O)cc(COc3cccc(NC(=O)c4cccc(Cl)c4)c3)nc2s1	0.713224
Cc1ccccc1-c1nsc(N[C@H](C)C(=O)N(C)C)n1	0.000315444
Cc1cc(=O)n2cccc(C(=O)NCc3ccnc(-c4cccs4)c3)c2n1	0.168938
CC(C)C1CCCN(C(=O)c2cccc(OCC(F)(F)F)n2)CC1	0.782258
COc1nscc1CN(C)Cc1cc(C)sc1C	0.99343
C[C@]12CCC(=O)C=C1CCC1C2CC[C@@]2(C)C1CC[C@]2(O)C(=O)CSCCO	0.27048
O=C(O)CCCNC(=O)N(Cc1ccccc1Cl)CC1CC1	0.017222
Cc1noc(C(C)C)c1CN1c2ccccc2CS1(=O)=O	0.00113325
COC1(OC)CC(CN2CCC(c3ccccc3C)CC2)C1	0.974703
COC(=O)c1ncn(CN2CCCC2c2ccc(C)c(C)c2)n1	0.0754696
Cc1cc(C)n(CC(C)NC(=O)C=Cc2ccc3c(c2)OCO3)n1	0.99555
CC1(Cc2ccccc2)CCCN1CC1CCS(=O)(=O)C1	0.035934
CN(CCCCCc1cc(-c2ccccc2)n[nH]1)C(=O)C1CCNC1	0.9235
Cc1oc(-c2ccc(Cl)cc2)nc1CSc1nc(O)c2c(n1)CCCC2	0.0447287
CC(N)C1CCCN(C(=O)c2cnn(Cc3ccccc3Cl)c2)C1	0.93748
COc1nccnc1-c1ccc(C(=O)N(C)CCc2scnc2C)cc1	0.968248
CC(Oc1ccccn1)C(=O)N1CC2(CN(C)C(=O)O2)C1	0.978242
O=C(c1ccc2c(c1)CNC2)N1CCCC1CN1CCCCC1	0.880819
Cc1nsc(C=Cc2c(C)noc2C)n1	0.961437
COc1ccc(C(=O)NNC(=O)c2cccc(Cl)c2)cc1S(=O)(=O)N(C)Cc1ccccc1	0.43399
COc1cc(CN2CCCC(N3CCN(c4ccccc4OC)CC3)C2)cc(OC)c1	0.991061
Cc1ccccc1CC(=O)N1CCN(C(=O)C(C)(C)C#N)CC1	9.82959e-05
N/C(=N\N=C\c1ccc(I)o1)c1nonc1N	0.956942
CCc1ccccc1NC(=O)N1CCC(NC(=O)C(Cc2ccccc2)NC(C)=O)CC1	0.00742728
CCOC(=O)Cn1nnc(-c2cccc(NC(=O)C(C)n3cccc3)c2)n1	0.557226
CC1CCCN(S(=O)(=O)N2CCCc3c(C(N)=O)cccc32)C1	0.01911
Cc1ccccc1OCCNC(=O)C1CCCN1S(=O)(=O)c1ccc2ccccc2c1	0.00139737
O=c1cccc(C(O)CNc2ncc(Cl)cc2F)[nH]1	0.994508
CCOC(=O)c1c(NC(=S)Nc2ccc(OC)cc2)sc2c1CCCCC2	0.00822746
COc1ccc(CNC(=O)CCc2c(C)n(C)c3cc(-c4ccccc4C)nn3c2=O)c(OC)c1	0.0485025
CC(Oc1ccc(Cl)cc1Cl)C(=O)NN=Cc1c[nH]c2ccccc12	0.674027
COc1ccc(C(CNC(=O)C2CCN(C(=O)c3ccco3)CC2)N2CCCCC2)cc1	0.957092
CC(CC(=O)Nc1cccc2c1CCCC2)=NNC(=O)c1ccccc1	0.0117882
CCc1cccc(CC)c1NC(=O)N(C)CC1CCN(C(C)=O)C1	0.00464531
CCCN(CC1CC1)C(=O)c1cn(Cc2ccccc2)cc(C(=O)NCC)c1=O	0.0401342
O=C(NC1CCCN(c2cc(-c3ccc(F)cc3)n[nH]2)C1)c1ccc(OC(F)(F)F)cc1	0.0893542
NC1(C(=O)Nc2cccc(CCC(=O)O)c2)CCCC1	0.0033824
O=C(NCc1cn2ccccc2n1)c1cccc(S(=O)(=O)NC2CCCC2)c1	0.00178794
CC(C)(C)c1ncc(CNc2cccc3c2CCO3)s1	0.995357
NC(=O)c1csc(S(=O)(=O)NC2CCCN(Cc3ccccc3F)C2)c1	0.00114237
Cc1cccc(CC2S/C(=C(/C#N)C(=O)Nc3ccc(Cl)cc3)N(c3ccc(Cl)cc3)C2=O)c1	0.266495
CCN(CC)c1c(F)c(F)c(/C=C/C(=O)O)c(F)c1F	0.0237057
Cc1ccc(NC(=O)N2CCC(c3nc(C(=O)N(C)C)c(C)o3)CC2)cc1C	0.977627
N#CC1(F)CCN(C(=O)[C@]23C[C@H]2COC32CCC2)C1	0.00126213
NC1(c2noc(CSCc3ccc(Cl)cc3)n2)CCC1	0.00525614
Cn1ccnc1[C@@H]1OCCC[C@H]1CNC(=O)CO	0.2714
CN(C)Cc1c(C(=O)c2ccccc2Br)c(=O)n(C)c(=O)n1C	0.963162
O=C(NC[C@H]1OC[C@@H](NCc2ccccc2F)[C@@H]1O)C1CC1	0.148753
CC(NSc1ccccc1[N+](=O)[O-])C(=O)[O-]	0.00124697
CCOCCCNC(=O)c1nc2c3c4c(sc3ncn2n1)CCCC4C	0.00029633
CCC(C)N1C(=O)C2C(C(=O)Nc3ccc(OC)cc3)C3C=CC2(O3)C1C(=O)NC1CCCC(C)C1C	0.00417031
C=CC(=O)Nc1ccc(O)c(C(=O)NC2COc3cc(F)cc(F)c32)c1	0.000662619
CN(CC1(CO)CC1)CC1(O)CCCN(CCc2ccccc2)C1=O	0.0159731
CC1CN(CCC(=O)c2ccccc2)CCO1	0.758622
O=C(Cc1csc(NC(=O)c2ccco2)n1)NC1CCCc2ccccc21	0.00034654
C=CC(=O)N1CCCC1c1cccc(C(=O)NC2(C#N)CCCC2C)c1	0.000275597
Cc1ccc(C2=NNC(C(C)(O)C(C)(O)C(C)(O)C(C)(O)CO)S2)cc1	0.0860017
Cn1c(COc2ccccc2Cl)nnc1SCCC(=O)Nc1ccc2c(c1)OCO2	0.36125
Cc1ccc(CNC(=O)c2cn(-c3cc(-c4nc(C)no4)ccn3)cn2)cc1	0.0095501
CCc1ccc(CNCc2ccc(F)c(C)c2)cc1	0.982149
Cc1cncc(C)c1NC(=O)N[C@H]1CCCc2ccc(F)cc21	0.00014721
COc1cc(CN2C[C@H]3C[C@@H](O)C[C@H]3C2)ccc1OCc1ccccc1	0.988961
Cc1nc(C2CCOC2)sc1C(=O)Nc1cccnc1OCc1ccccc1	0.105725
O=S1(=O)CC2(CC(CNC3CCC(O)(c4ccccc4)CC3)C2)C1	0.00318957
C/C(=N\NC(=O)C(C)Sc1ccccc1)c1ccc2c(c1)C1C=CCC1C(c1ccccc1Cl)N2	0.994552
CC1CN(C(=O)c2ccc(-c3nnn[nH]3)cn2)CC(CC(F)(F)F)O1	0.96625
Cc1cc(C)n(CCNc2nnc(C(C)(C)C)o2)c(=O)n1	0.734508
Cc1nn(Cc2ccccc2Cl)c(C)c1C(=O)N1CCC(C(=O)O)CC1	7.75328e-05
CC(C)c1nnc(COC2CN(C(=O)[C@@H](O)c3ccccc3)C2)o1	0.0045955
Cc1ncc2c(n1)CCCC2NC(=O)c1ccccc1Cn1cncn1	0.946687
COC(=O)C1CCCCN1CC(=O)N(Cc1cccs1)c1ccc2c(c1)OCCO2	0.168614
C=C(Cl)Cn1c(=O)c(CNCCc2nnc(C)[nH]2)cc2ccc(F)cc21	0.997611
C=CCOc1ccc(/C=N/Nc2nc3c(c(=O)n(C)c(=O)n3C)n2Cc2ccccc2)cc1	0.982012
CN1CCCCC(C(=O)NCc2ccc(C(F)(F)F)cc2)C1=O	0.00133334
O=C(NC1CCCCCC1)c1cccc(-c2nccnc2N2CCCC2)c1	0.769688
CC(C)c1csc(C(=O)NC2CCN(C(=O)N3CCCC3)CC2)n1	0.309562
Cc1ccc(C)c(/C=C2\SC(c3ccccc3)=NC2=O)c1	0.53827
Cc1cc(C(=O)NCC2CC2)sc1C	0.000239326
CCc1ccc2nc(-c3ccc(Cl)cc3)cc(C(=O)Nc3cc(C)ccc3C)c2c1	0.989354
Cc1sc2nc(CN3CCCC3)nc(N3CCN(C(C)(C)C)CC3)c2c1C	0.749132
CC(C)Oc1cccc(F)c1-c1nc(N(C)C)n(C)n1	0.0704473
COc1cc(CNc2nccc3c(OC)cccc23)cc(OC)c1	0.932505
CN(c1cccc(CN)c1)S(C)(=O)=O	0.000165776
NNc1nnnc2c1sc1nc(N3CCOCC3)c3c(c12)CCCC3	0.722241
Nc1nccnc1-c1nc2cnccc2s1	0.820467
Cc1cccn2cc(CC(=O)NCc3ccnc(N(C)C)c3)nc12	0.875574
CCC(C)(C)C1CCC(NC(=O)c2cnc3ccccn3c2=O)CC1	0.552437
NC1CCOC(C2CCCN(Cc3ccn(-c4ccccc4)n3)C2)C1	0.992676
CC1CCN(C(=O)c2ccccc2NC(=O)C2CCC(C(=O)O)CC2)CC1	0.039797
CC(C)OCCCNC(=O)C1CCCN(Cc2ccncc2)CCC(=O)NCC1	0.217198
CC[C@@]1(C(=O)O)C[C@@H]2CC[C@H]1N2C(=O)c1cncc(Cl)c1	0.22533
CCn1ncc2cc(C(=O)NCCSSCCC(=O)O)c(C)nc21	0.983404
O=C(Nc1cscc1Br)NC1CCc2ncnn2C1	0.345914
CCOC1(C(=O)N(CCc2ccc(C)o2)Cc2ccncc2C)CC1	0.000870119
O=C(c1ccc(F)cc1Br)N1CCC(NCC2CC2)CC1	0.972894
COC(=O)c1ccc(C2C(=C(O)c3ccc4c(c3)OCCO4)C(=O)C(=O)N2c2nc3ccc(Cl)cc3s2)cc1	0.925072
CC(C)Cc1ccc(CN2CC3(C)C(=O)NC(=O)C3(C)C2)cn1	0.431265
Cc1cc(-c2cc(C(=O)Nc3cccc(-c4ncco4)c3C)c3c(C)noc3n2)c(C)s1	0.243736
Oc1ccc(NC2CCCCC2)cc1	0.694633
Cc1cc(CN2CCN(C(=O)CCNC3=NS(=O)(=O)c4ccccc43)CC2)no1	0.256229
CCOc1ccc2[nH]c(=O)c(CN(CC3COCCO3)C(=O)c3ccco3)cc2c1	0.74539
CCOC(=O)/C(=C\c1ccc(OS(=O)(=O)c2ccc(C)cc2)cc1)NC(C)=O	0.881863
O=c1c2c3c(sc2ncn1CCN1CCOCC1)CC(NC1CCCCCC1)CC3	0.357121
CCOCCCn1c(SCc2ccccc2F)nc2cc(S(=O)(=O)N3CCOCC3)ccc21	0.000865429
CCC(=O)c1ccc(OCC(=O)OC(C)C(=O)N(C)c2ccccc2)cc1	0.0277863
O=C(O)CC1CCCN1C(=O)C1(c2cccc(Cl)c2)CCC1	9.61007e-05
CCc1ccc(NC(=S)Nc2ccc(S(=O)(=O)N3CCCc4ccccc43)cc2)cc1	0.965393
CN(CCc1ccccc1)C(=O)C(F)F	0.00046967
COc1ccc(NC(=O)CC2C(=O)N(Cc3ccccc3)C(=S)N2Cc2ccc(OC)c(OC)c2)cc1	0.0023859
COC(=O)C(Cc1ccccc1)NC(=O)c1ccccc1F	0.00742396
CC(CN)C(=O)N1CCN(Cc2csc(-c3ccccc3)n2)CC1	0.994531
CC[C@]1(O)CCC[C@H]2CN(C(=O)Cn3ccccc3=O)C[C@H]21	0.0215464
NCCCC[C@@H]1NC(=O)[C@H]2CN(C(=O)c3ccc4ccccc4c3)CCN2C1=O	0.935803
Clc1ncnc2c3c(oc12)CCCC3	0.000494755
Cc1nc(C(F)(F)F)ccc1C(=O)NS(=O)(=O)c1ccnn1C	0.000551434
O=C(NCCOC(=O)c1ccc(Cl)c(S(=O)(=O)N2CCCCC2)c1)c1ccncc1	0.168391
Cn1nc(-c2ccccc2)c(C=O)c1Sc1ccc(Br)cc1	0.370108
CC(C)Nc1nc(-c2ccccc2)nc2c1CCC21CCN(C2CCN(C)CC2)CC1	0.912114
CC(C)(C)N(Cc1ccccc1)C(=O)COC(=O)c1cccc(NS(=O)(=O)c2ccc(F)c(F)c2)c1	0.00152173
NC(=O)c1c(/N=c2\oc3ccc(Br)cc3cc2-c2nc3ccccc3[nH]2)sc2c1CCCC2	0.0673162
O=C(O)COc1ccc(C=NNc2nc(Nc3ccccc3)nc(N3CCCCC3)n2)cc1	0.270446
Cc1ccc(-n2nnc(C(=O)Nc3cc(Cl)ccc3F)c2C2CC2)cc1	0.000276633
Cn1nc(C2CCCN(C(=O)COc3ccccc3)C2)c2nccnc21	0.0579013
Cc1ccsc1C=CC(=O)NC1=NCCS1	0.825489
CC(C)N1CCC(NC(=O)c2ccc(-c3ccccc3F)s2)CC1	0.948954
COc1ccc(Cl)cc1C(=O)Nc1ccnn1Cc1ccc(C(F)(F)F)cc1	0.00154327
COc1ccc(-c2cn(-c3ccc(C)c(C)c3)c(NC(=O)CN(C(=O)c3ccccc3)C3CC3)n2)cc1	0.00370618
CCNC(=O)N1CCC2(CC1)CC(CNC(=O)c1ccccn1)CCO2	0.979844
CCOc1ccccc1-c1nc(-c2ccc(-c3ccc(Cl)cc3)nc2OC)no1	0.00139862
CCNC(=O)N1CCC(NC(=O)c2cccc(-c3ccc(O)cc3)c2)CC1	0.0381091
CCOP1(=O)C(CCO)=CN(c2ccccc2)N=C1C(C)=O	0.000147749
COc1cc(C)cc(-c2nccn2Cc2ccc(S(N)(=O)=O)cc2)c1OC	0.00171681
CCC[C@]1(CO)CCN(Cc2n[nH]c(C)c2Cl)C[C@H]1O	0.95326
Cc1cc(=O)c2cc(C(=O)Nc3ccc(C)c(C)c3)ccc2[nH]1	0.999106
CCN(CCC(=O)O)C(=O)c1[nH]c2ccccc2c1Cl	0.104303
COc1cc(C(=O)N(C)Cc2cc(C(=O)O)c(C)o2)ccc1Cl	0.0120069
COc1ccc(C(=O)C2CCN(Cc3c(O)ccc4ccccc34)CC2)cc1	0.987962
NC(=O)c1ccsc1NC(=O)COC(=O)c1cccc(Cl)c1	0.00015022
NCCCNC(=O)c1cc2cc(Br)cc(Br)c2o1	0.0565547
c1ccc(C2CC(c3ccco3)n3cnnc3N2)cc1	0.00397828
Cc1cc(N2C[C@@H]3CCN(Cc4cc5ccccc5o4)[C@@H]3C2)ccn1	0.996256
CCc1oc2ccccc2c1CC(=O)N1CCC(N(C)Cc2ncccn2)C1	0.833853
Cc1c2cc(NC(=O)C(N)Cc3cc[nH]n3)ccc2nn1C	0.982138
CCOc1ccc(C(=O)NC2CCc3ccccc32)cc1	0.00434328
CC[C@H]1OC(=O)[C@H](C)[C@@H](OC2C[C@@](C)(OC)[C@@H](O)[C@H](C)O2)[C@H](C)[C@@H](O[C@@H]2O[C@H](C)C[C@H](N(C)C)[C@H]2O)C(C)(O)C[C@@H](C)CN(C)[C@H](C)[C@@H](O)[C@]1(C)O	0.996662
CC(C)COc1ccc(F)cc1CO	5.01345e-05
CC(=O)N(C)c1ccc(NC(=O)C(N)CC(F)F)cc1	0.0174209
COCCn1c(C)cc(C(=O)COc2nc3ccccc3nc2C)c1C	0.99204
COc1ccc(-c2nc(-c3ccc4c(c3)CC(=O)N4C)cs2)cc1	0.978243
Cc1cnc2c(S(=O)(=O)N3CCC(O)(c4ccn[nH]4)C3)cccc2c1	0.390469
Cc1cccc(Cn2ccn3nc(-c4ccc(F)cc4)cc3c2=O)c1	3.52901e-05
Cc1nn(C(C)C)c(C)c1NC(=O)CCCOc1cccc(F)c1	1.98866e-06
CC(=O)/C(C(=O)c1ccccc1[N+](=O)[O-])=C(/C)O	0.00495644
Cc1ccc(NC(=O)CNC(=O)C(C)(C)N)c(Cl)c1	0.0435484
O=C(Cc1cccc(F)c1)N1CCn2nc(-c3ccccc3)nc2C1	0.00264486
Cc1nc2n(c1C)CCN(c1ccc3nnc(C(F)(F)F)n3n1)C2	0.155043
COc1ccc(Cl)cc1NC(=O)CN(C)S(=O)(=O)c1ccc(F)cc1	0.000173893
O=C(O)CCCCC(=O)NC1CCN(CC(F)(F)F)C1=O	0.000170063
CONC(=O)c1c(C)oc(C)c1C	2.74503e-05
C[C@@H](NC(=O)C1(C)CCN(C)CC1)c1ccc(Br)cc1	0.983061
NS(=O)(=O)c1cc2c(s1)CCNC2	8.65724e-05
CCc1ccccc1NC(=O)Cc1ccccc1Cl	0.27982
CC(=O)c1ccc(-c2ccc(C(=O)NC(C)c3cc4ccccc4o3)o2)cc1	0.0201511
CN(C)CC1CN(C(=O)c2[nH]cc3c(=O)n(C)ccc23)c2ccccc2O1	0.987159
COc1ccccc1CCC(=O)N1CCn2nc(C(=O)N3CCc4ccccc4C3)cc2C1	0.577209
Cc1ccc(-c2ccc(C(N)=S)cc2)cc1	0.00796336
CN(C)Cc1ccc(C(=O)N[C@@H]2COCC[C@H]2Oc2ccccn2)o1	0.955423
CN1CC2(CCN(Cc3cc(C#N)n(C)c3)CC2)CC(c2ccccc2)C1=O	0.133946
CCCCC(CN)NC(=O)c1ccc([N+](=O)[O-])cc1F	0.994187
O=C(C1=CCCCC1)N1c2ccccc2CCc2ccccc21	0.788945
CCn1nc(C)c(CNC(=O)Nc2ccccc2F)c1C	0.000205414
COc1ccc(OC)c(CN2CCN(C(=O)CC(C)C)CC2)c1	0.990631
NCC1CCCN1C(=O)c1ccccc1F	0.931286
CN(Cc1ccc(C(C)(C)C)cc1)C(=O)CCNC(=O)C=Cc1ccco1	3.18709e-05
Cc1cc(NC(=O)c2ccc(CN3CCN(CC4CCCO4)CC3)cc2)ccc1Cl	0.995802
CC1(C2CCN(C(=O)C3(Nc4ccccc4)CC3)CC2)NC(=O)NC1=O	0.0352129
CC(O)CN1CCSC(C)(C)C1	0.0554214
Cc1cc(Br)c(NC(=O)CNC(=O)OC(C)(C)C)c(Br)c1	0.000145626
Cc1ccc(S(=O)(=O)NCCC(=O)NCc2cccc(NC(=O)N(C)C)c2)c(C)c1	0.00022654
Cc1ccc(C)c(OCC(=O)Nc2ccc([N+](=O)[O-])cc2)c1C	0.969569
COc1ccc(C2NC(=O)C(C#N)=C(SCC(=O)Nc3ccccc3C)N2c2ccccc2)cc1OC	0.0275828
CCOC(=O)[C@@]1(Cc2ccccc2)C[C@H]2CC[C@@H]1N2C(=O)c1cc(=O)cc(C)o1	0.0771717
O=S(=O)(NCCc1ccccc1)N1CCC(O)CC1	0.0179867
O=C(c1ccncc1)N1CCCCCCCNCc2cc(NCCOc3ccccc3)ccc21	0.997233
CCN1CCCC(CNC(=O)Cc2c(C)[nH]c3ccccc23)C1	0.778188
O=C(c1ccccc1-n1cnnn1)N1CCN(Cc2csc3ccccc23)CC1	0.997105
Cc1ccc2cc(/C=C(\C#N)c3nc(-c4ccc(Cl)cc4)cs3)c(Cl)nc2c1	0.971179
CCCN1Cc2nnc(-c3c(C)n[nH]c3C)n2[C@@H](C)C1=O	0.000198138
O=C(c1ccnc(Cl)c1)N1CCN(c2nccc(-c3ccc(Oc4ccccc4)cc3)n2)CC1	0.98799
O=C(Cc1cccc(F)c1)N1CC[C@@H](N2CCC(O)CC2)[C@H](O)C1	0.113738
CN(C(=O)c1cc2occc2n1C)c1ccccc1	0.704282
COc1nn(C(C)C(=O)NNC(=S)NC2CCCCC2)cc1[N+](=O)[O-]	0.00320203
COc1cccc(C(=O)N(CC(C)C)c2nnc(-c3ccc(C)cc3)s2)c1OC	0.582995
CCOc1ccccc1NC(=O)c1nnn(-c2ccccc2F)c1C	0.00362076
Oc1c(Br)cc(Br)cc1/C=N/Nc1ncnc2c1cnn2-c1ccccc1	0.496247
Cc1nc(-c2ccc(OC3CCOC3)cc2)sc1C(=O)O	0.111515
Cc1cc(N)ccc1N1CCC(O)CC1	0.9894
CCCNC(=O)C1CN(C(=O)c2ccc(OC)cc2)CC1c1cccc(F)c1	4.51272e-05
O=C(c1cc(-c2cccs2)n[nH]1)N1CCC(Oc2ccncc2Cl)C1	0.815666
COC(=O)c1cc(C)sc1NC(=O)C(C#N)=Cc1ccc(OC)cc1OC	0.121711
Cc1cc(CNC(=O)N2CC3(CCC3)c3c(F)cccc32)on1	3.8739e-05
Cc1ccc(-n2nnnc2SCC(=O)N2CCN(S(=O)(=O)c3ccccc3C#N)CC2)cc1	0.00186988
Cc1cccc(CC(CNC(=O)Cn2ccc([N+](=O)[O-])n2)C(=O)O)c1	0.000570305
CCN(CC)C1=C2NC(=O)/C(C)=C\C=C/[C@H](C)[C@H]3OC(C)(C)O[C@@H]([C@H](C)[C@H](OC(C)=O)[C@H](C)[C@@H](OC)/C=C\O[C@@]4(C)Oc5c(C)c(O)c(c(c5C4=O)C1=O)C2=O)[C@@H]3C	0.983986
COc1cc(NC(=O)C2C(C(=O)O)C2(C)C)ccc1-c1ccc(CO)o1	0.000397026
Cc1nc(-c2nc(C(=O)NCc3ccsc3)c3ccccn23)cn1Cc1ccccc1	0.0289127
O=C1CCc2ccc(C(=O)NC3CC(Cn4ccnn4)C3)cc2N1	0.928535
CC1(C2CC2)CC(=O)N(CC(=O)N2CCC(Cc3ccc(F)cc3)CC2)C1	2.58677e-05
O=C(CCN1C(=O)S/C(=C\c2ccco2)C1=O)NCCc1ccc(O)cc1	0.424818
Clc1ccc2nc(NCC3OCCCO3)cnc2c1	0.998128
O=C(NC1(C(=O)O)CC1)c1cnc(-c2ccc3c(c2)OCO3)s1	0.00146772
CCC(CC)C(=O)N1CCC(COc2ccc(Cl)c(C)c2)(CC(=O)N2CCOCC2)CC1	4.90672e-05
COCCN1CCN(S(=O)(=O)c2ccn(C)c2)CC1	0.0342105
O=C(Oc1ccccc1)Oc1ccc(N(C(=O)Oc2ccccc2)S(=O)(=O)c2ccc(Cl)c([N+](=O)[O-])c2)cc1	0.703636
CN(CCc1nccc(O)n1)C(=O)c1cc2n(n1)CCO2	0.987469
CCN(CC)Cc1ccc(CNC(=O)[C@@H]2CCCC[C@@H]2C(=O)O)cc1	0.00368454
CC1(C(=O)NCCc2ccccc2F)Oc2ccccc2NC1=O	0.000746049
CC[C@@H](C(=O)NC(CNc1nccc(OC)n1)CC(C)C)N(C)C	0.468064
Cc1nnc(CC(=O)NCC2(c3ccccc3Cl)CCC2)s1	0.00105202
CCCCN(CCCNC(=O)Cn1ncc2ccsc2c1=O)Cc1ccccc1	0.000268636
CC(C)C(Oc1ccccc1Br)C(=O)N1CCC(C(=O)O)CC1	0.00507838
COC(=O)[C@H]1C[C@H](NC(=O)CC2CCCN(c3nc4ccc(Cl)cc4o3)C2)C1	0.883413
Cc1c(Cl)cccc1N=Nc1c(C)c(C#N)c(=O)n(CCCO)c1O	0.0193505
CN(C)C(=O)CCC(=O)N1CCc2oc(-c3ccccc3)nc2C1	0.675332
COc1ccc(C2Cn3nc(C(=O)N4CCC(C(=O)Nc5cc(C)ccc5Cl)CC4)cc3CO2)cc1OC	0.875272
COc1cnc(OC2CCCN(c3ncc(F)cn3)C2)nc1	0.203687
Nc1ccc(-n2nc(C(F)(F)F)cc2C(=O)O)c(F)c1	0.000791912
Cn1ccnc1CNc1nccc(-c2ncnn2C)n1	0.8254
CSc1ccc(OC(C)C(=O)NC(CCC(=O)O)c2ccccc2)cc1	5.81967e-05
Cc1noc2ncc(NC(=O)CC(C)CC(=O)O)cc12	0.560062
COc1ccc(OCCCN2C(=O)C3(CCCCCC3)N=C2O)cc1	0.00871773
CC(C)(C)c1cc(NC(=O)CCCC[C@@H]2SC[C@@H]3NC(=O)N[C@@H]32)n(C(C)(C)C)n1	0.0257464
COCCN(CCOC)Cc1nc(-c2ccc(C(F)(F)F)cc2)no1	0.0164169
CC1CCC(C(=O)O)CN1C(=O)c1ccc2c(c1)COC2	0.00705239
CCOc1ccc(S(=O)(=O)N(CC(=O)N/N=C/c2cccc([N+](=O)[O-])c2)c2ccc(C)cc2)cc1	0.794894
CCn1ncc(CNC(=O)N2C[C@@H]3CCC[C@@H](C3)C2)c1C	0.00752508
CN(C)C(=O)c1ccc(C(=O)N(CCc2ccccc2)CC(=O)O)cc1	0.00543763
O=C(c1ccc[nH]c1=O)N1CCC2(CC1)NC(c1ccc3c(c1)OCO3)=NO2	0.984208
COc1ccc2c(c1)C=C(c1c(C#N)c(C)nc3c1C(=O)c1ccccc1-3)CO2	0.921953
COCC1C(=O)N(c2ccccc2)CC12CCN(C1CCC1)CC2	0.440315
Cc1ccc(-c2cc(C(=O)Nc3nc(C)c(C(=O)N(C)C)s3)n[nH]2)s1	0.73445
CC1Cc2ccccc2N1Cc1ccoc1C(=O)NC1=NCC(=O)N1C	0.965599
N#Cc1cnc2ccc(Cl)cc2c1N1CCC(C(=O)Nc2ccc3c(c2)CCC3)CC1	0.0281704
COc1ccc2[nH]cc(CCNC(=O)C34CC(CN3C)C4)c2c1	0.212462
COC(=O)c1cc2ccc(Br)cn2c1	0.141904
Cc1ccc(N2CC3(CCN(Cc4ccncc4)C3)CC2=O)s1	0.865095
CCOc1ccccc1N(CC)C(=O)Nc1cn(C)c(=O)c2ccccc12	0.000449321
COc1ccc(NC(=O)CCC2CCCCC2)cc1OC	0.0356328
N#Cc1c(F)cccc1-n1ccc(NC(=O)NCCS(=O)(=O)CC2CCC2)n1	0.000159006
O=c1oc2ccccc2n1CCCN1CCCC1c1ccc(F)cc1	0.864453
Cc1cccc2nc(CNC(=O)[C@H]3C[C@@](F)(CO)C3)cn12	0.127425
Cc1ccc(-c2nc(COC(=O)C3CCN(C(=O)NCc4ccco4)CC3)no2)cc1	0.848731
CN(CC1COc2ccccc2O1)C(=O)Cn1cccn1	0.990517
CC(C)c1ccc(N(C(=O)Cn2nnc3ccccc32)C(C(=O)NCC2CCCO2)c2ccncc2)cc1	0.0741011
O=C1OC(Nc2ccc(Cl)cc2)(c2ccc(Cl)cc2)c2ccccc21	0.976053
CC(NC(=O)C1CCCCC1(C)N)c1cccc(N2CCCC2)c1	0.016943
CC1CCN(CCCNCc2c[nH]nc2-c2cccnc2)CC1	0.954137
N#Cc1cnc2c(F)cc(F)cc2c1NCCc1nccn1C(F)F	0.00325418
Cn1c(=O)nc(O)c2c1nc(N1CCN(Cc3ccc(F)cc3)CC1)n2Cc1ccccc1	0.95275
O=C(CNc1ccccc1)N1CC2CCC1C2	0.907946
CNc1ccc(Nc2ccnc(-c3ccccc3)n2)cn1	0.108361
Cc1ccc(OCC(=O)NCc2csc(-c3ccccc3)n2)c2c1C(C)CC2=O	0.0936296
CCC1CCN(C(=O)C2(S(C)(=O)=O)CCNCC2)CC1	0.793011
CCCNC(=O)Cn1c(=O)n(-c2ccc(OC)cc2)c(=O)c2cc(C)ccc21	0.00215979
COc1ccc2c(c1)CCC(NC(C)c1nnc(C)s1)C2	0.544388
CC(C)CC(=O)N1CC(F)(F)CC1Cn1cc(C(=O)N2CCOCC2)nn1	0.402952
C[C@@H]1OCC[C@@H]1NC(=O)c1cnc(-c2c(F)cccc2F)s1	3.01961e-05
CCC(C)(N)c1cn(Cc2ccc(Cl)s2)nn1	0.344511
O=C(OCC(=O)N1c2ccccc2Sc2ccccc21)c1ccc(I)cc1	0.998737
COCCN(CC(=O)Nc1nc(CC(=O)NCc2ccccn2)cs1)C(=O)c1ccc(Cl)cc1	0.0991365
Cc1cc(-c2ccc(C(=O)N(C)CCCN(C)C)cc2)ccc1Cl	0.988249
Cc1[nH]/c(=N\C(=O)c2ccccc2)sc1-c1nc(-c2ccccc2)no1	0.108805
Cc1nnc(SCC(=O)Nc2ccc(Cl)c([N+](=O)[O-])c2)n1C	0.051685
COC(=O)C1=CN(C(C)C)C=C(C(=O)OC)C1c1cccc(Br)c1	0.00113421
COC(CNC(=O)c1ccccc1C)c1ccccc1Cl	0.250152
COc1ccc(OC)c(NC(=O)c2cc(-c3cn(C)nc3C)nc3onc(C)c23)c1	0.0662736
Cc1nn(CCOC(=O)c2ccccc2)c2c1P(=S)(N1CCCC1)OC(c1ccccc1)=N2	0.0783205
Cc1cc(C)c2c(c1)C(NCc1nnc3n1CCCC3)CCCO2	0.998766
O=C(CN1C(=O)C2CC=CCC2C1=O)NCCSCc1ccc(Br)s1	0.0134856
CCC(=O)/N=C(/Nc1cccc(OC)c1)Nc1nc(C)cc(C)n1	0.172711
CN(C)C(=O)CN1[C@@H]2CN(C3CCC(F)(F)CC3)C[C@@H]2OCCS1(=O)=O	0.000167139
COc1ccccc1CC1CCCCCN1C[C@H]1CCCC(=O)N1	0.992062
Cc1ccc(CC(=O)N(CCC#N)Cc2cccnc2)s1	0.270318
CC[C@H](N)C(=O)N[C@H]1CCCO[C@@H]1c1ccncc1	0.186159
O=C(N[C@@H](c1ccccc1)[C@H](O)c1ccccc1)c1cccc2[nH]c(=O)oc12	0.0573767
COc1cc(Cl)c(NC(=O)CN(C)S(=O)(=O)c2ccc3[nH]c(=O)ccc3c2)c(OC)c1	0.000181663
C[n+]1c(-c2ccc(C=O)cc2)cn2ccccc21	0.998948
COc1ccc(CC(=O)N/N=C(/C)c2cccc(NC(=O)C3CC3)c2)cc1	0.550044
CCOC(=O)c1ccc(NC(=O)CCN2C(=O)c3cccc4cccc(c34)C2=O)cc1	0.00842554
COc1ccc(C(O)CN2CCC3(C=Cc4cc(C)c(C)cc4O3)CC2)cc1OC	0.986999
CC(CN(C)C(=O)CCCc1ccc(Br)s1)C(=O)O	0.000342553
CS(=O)(=O)c1ccc(NS(=O)(=O)c2ccc3ccccc3c2)cc1	0.054033
CCN1CCN(CC(=O)NC(C)Cc2cccnc2)CC1	0.978273
Cc1sc(Br)cc1C(=O)N1CC[C@H]1C(=O)O	1.43966e-05
C=CC(=O)N1CCCC(C(=O)N(C)Cc2ccc(Br)c(C)c2)C1	2.06321e-05
CCOc1cccc(-c2noc(-c3ccccc3)n2)c1	0.475195
NS(=O)(=O)c1cc(Br)ccc1OC(F)(F)F	4.31431e-06
COc1ccccc1NC(=O)C=Cc1ccc(OCC#N)c(OC)c1	0.858101
O=C(Nc1nnc(SCc2ccc(F)cc2)s1)c1cc([N+](=O)[O-])ccc1N1CCCC1	0.934492
CC1CN(CCOc2ccccc2)CCN1CC(O)c1ccccc1	0.98957
Cc1ccc(CNC(=O)N2CCN(c3ccccn3)CC2)c(C)c1	0.00389226
Nc1nccnc1C(=O)N1CCCc2cc(F)ccc21	0.0181511
CC(C)Oc1ccc(-c2nc(C(=O)NCCN3CCNCC3)cs2)cc1	0.99201
Cc1nc(-c2ccccc2)sc1C(=O)Nc1cccc2[nH]ccc12	0.00136249
COc1ccc(-c2csc(C(C#N)=CNc3ccc(C(C)=O)cc3)n2)cc1	0.723066
CCOC(=O)c1oc2ccccc2c1NC(=O)c1ccc(OC(C)C)cc1	0.0752264
CN1CCOc2ccccc2CCCCCC2(CCN(C(=O)CCC3CCCC3)CC2)C1=O	0.000295077
CC1CN(CC(=O)Nc2ccccc2F)CC(C)O1	0.697383
NC(=O)C1CCN(C(=O)c2ccccc2-n2cnnn2)CC1	0.724125
COc1ccc(NC(=O)C2CC(=O)N(c3ccc(F)cc3)C2)cc1	0.0523354
Cc1oc2ncn(C)c(=O)c2c1C(=O)N1CCc2ccccc21	0.0666959
Cc1ccc(C(=O)N2C[C@@H]3OCCN(c4cnccn4)[C@@H]3C2)cn1	0.975272
O[C@@H]1CC(Cn2ccnc2)C[C@H]1NCc1cccc2c1NCCC2	0.995128
Cc1nc(CCC(=O)N2CCCCC2CN)oc1-c1ccccc1	0.772496
COCSc1ccc(C(=O)OCC(=O)c2ccc(Br)cc2)cc1	0.530736
CCN(CC)CC(O)CSc1nnc(Nc2cccc(OC)c2)s1	0.989008
CCCCc1ccc(NC(=O)C2CCCN(C(=O)c3nnn4c3COC(c3cc(Cl)ccc3Cl)C4)C2)cc1	0.268375
COc1ccc(CC(=O)Nc2cc(C)nn2-c2nc(-c3ccccc3)cs2)cc1	0.0399498
COc1ccccc1C1(NC(=O)c2cccn2C)CC1	0.00253813
CS(=O)(=O)C1CCCCC1Nc1nc2ccccc2n1C1CC1	0.000763465
COc1cccc2cc(C=CC(=O)OCC(=O)Nc3ccccc3C(C)C)oc12	0.021376
Cc1cc(OCC(=O)Nc2nccs2)c(C(C)C)cc1Br	0.00160662
COc1ccc(C(=O)N2CC[C@@H](O)C2)c(I)c1	0.000452927
COCCCNc1nnc(C)c2nnn(Cc3ccccc3Cl)c12	0.641448
CC1CCC(NC(=O)C2CCCN(C(=O)c3cc(-c4ccccn4)[nH]n3)C2)CC1	0.476696
CS(C)(=O)=Nc1cccc(-c2nc(C3CCCO3)no2)c1	0.200071
CN1C(=O)C(NC(=O)C(=O)NCc2ccc3c(c2)OCO3)c2ccccc21	0.000203708
O=C(NC1CN2CCC1CC2)C1CCCC1	0.502592
O=C(Oc1ccc(Br)cc1)C(F)(F)F	0.0164928
CN(CC(=O)NC(C)(C)C)CN1C(=O)c2ccccc2C1=O	0.879841
CCOC(=O)c1[nH]c(C)c(CN(Cc2ccc(OC)cc2)C(=O)Nc2cc(C)ccc2OC)c1C	0.000413796
Cn1ncc2c(=O)n(CCC(=O)OC(C(N)=O)c3ccccc3)cnc21	0.0879653
C=C(C)COc1ccccc1C(=O)NC(c1ccccn1)[C@H]1C[C@@H](O)C1	0.987294
Cc1ccc2[nH]c(SCCn3nc(C)nc3C)nc2c1	0.991241
CCCCN(CC)C(=O)c1c(Cl)ccc(S(=O)(=O)CCOC)c1Cl	0.118393
COc1ccccc1NC(=O)C(=O)NCC1(N2CCOCC2)CCC1	0.0548976
Cc1ccc(S(=O)(=O)N(C)c2ccc(C(=O)N3CCC(C(N)=O)CC3)cc2)cc1	0.807685
Fc1cc(CNc2cccc3cc[nH]c23)ccc1-n1cncn1	0.992312
Cc1ccc(C(=O)NCCN)cc1[N+](=O)[O-]	0.904187
COCC1(C(=O)NC(C)c2noc(-c3ccc(Cl)cc3)n2)CCNCC1	0.999193
Cc1cnn(C2(C(=O)O)CCN(Cc3cn(C)nc3-c3ccccc3)CC2)c1	0.906153
Cc1c(C(=O)Nc2ccc3c(c2)N(C)C(=O)CO3)oc2c1ccc1ccccc12	0.410787
c1ccc(Cn2c(CN3CCCC3)nnc2SCc2cccc3ccccc23)cc1	0.861665
Nc1ccc2cn[nH]c2c1	0.941922
CC(C)(C(=O)Nc1ccc(OCCCC(=O)O)cc1)c1ccc(F)cc1	0.000216889
COC(=O)[C@H](Cc1ccccc1)NC(=O)c1c(C)ccn(CCN2CCOCC2)c1=O	0.0285817
Cc1nc2c(s1)C(N(C)C(=O)c1cc(NC(=O)CCl)cc(C(F)(F)F)c1)CCC2	0.000816429
Cc1ncnc(N2CC3CC(C2)N3c2cccc(F)n2)c1C	0.898541
S=C(NCCCN1CCOCC1)NNc1c(Cl)cc(Cl)cc1Cl	0.993796
CC(C)(C)OC(=O)C(C)(C)n1ccc(N)n1	0.294718
O=C(CSc1nnc(-c2ccncc2)n1-c1ccccc1)NC1CCCC1	0.02738
COC(=O)CNC(=O)c1cc(-c2ccccc2Cl)nc2ccc(Br)cc12	0.924305
Cc1ccc(CN(C(=O)CCn2ncc(=O)c3ccccc32)C(C)C)o1	0.00691304
CC(CC(=O)N(Cc1ccccn1)C(C)C)c1ccc(F)cc1	0.00464923
COc1cnc(C(=O)NCCn2ccc3c(Cl)cccc32)cc1O	0.980581
CC1(OC(=O)c2csc(Cc3ccccc3F)n2)CCCC1	0.00130317
Cc1nn(Cc2ccccc2Cl)c(C)c1NC(=O)CSc1[nH]nc(C)c1[N+](=O)[O-]	0.00145529
C=C=CC(=O)NCCC1CCN(C2CCN(C)CC2)CC1	0.876984
Cc1ccc(C)c(CSC(C)C(=O)NC2CC2)c1	0.000163549
O=C(O)c1ccc2c(c1)C(=O)N(c1ccc(O)c(C(=O)O)c1)C2=O	0.0262708
CCn1ccnc1CSc1nnc(-c2cc(Cl)ccc2OC)[nH]1	0.000209114
Cc1[nH]ccc1C(=O)N1CCN(c2nc(C(N)=O)cs2)CC(O)C1	0.897335
CC(C)Oc1ccccc1C(=O)NC1CCN(c2ccccn2)CC1	0.721071
CCOC(=O)c1ccc(N2N=C(C)/C(=C\c3cc(OC)c(OCC(=O)NC4CCCCC4)cc3Br)C2=O)cc1	0.991022
Cc1cc(OC/C=C/c2ccccc2)c2c(C)c(CC(=O)O)c(=O)oc2c1	0.322322
O=C(N[C@H]1C[C@H](Cn2cncn2)C1)c1cc(-c2cccs2)n[nH]1	0.356164
O=C(NC(c1ccc(F)cc1)c1cccs1)c1ccncc1Cl	0.712581
N#Cc1csc(CNCc2ccccc2Br)c1	0.244897
COc1cc(/C=C2\CN(C(C)C)C/C(=C\c3cc(OC)c4c(c3OC)OCO4)C2=O)c(OC)c2c1OCO2	0.998819
Cc1cccc(-n2c(SCc3ccccc3C(=O)N3CCOCC3)nnc2-c2ccco2)c1	0.043953
O=C(CNc1ccc(NC(=O)C2CC2)cc1)Nc1ccc(F)cc1	0.659791
COc1cnc(C#N)nc1	0.0181463
O=C(/C=C\N1CCCCC1)c1ccc(Cl)cc1	0.955339
CC(c1ccc(S(C)(=O)=O)cc1)S(=O)(=O)F	1.45073e-05
O=C(CCNS(=O)(=O)c1ccc(Br)cc1)NCc1cn2ccccc2n1	0.00599151
CC1(NC(=O)C2CCOc3ccccc32)CCNCC1	0.931332
Cc1cc(NC(=O)CSc2ncccc2-c2nc(-c3ccccc3)no2)ccc1F	0.0417405
O=C(NC1CCCNC1)C1CCCN(C(=O)c2ccncc2)C1	0.99344
Cc1cc2ncc(C(=O)NC[C@@H]3C[C@H]3c3ccnn3C)c(C)n2n1	0.0160728
N#CC(=Cc1sccc1Oc1ccccc1)S(=O)(=O)c1ccc(C(F)(F)F)cn1	0.215638
Cc1cc(P(C)(C)=O)ccc1NC[C@H]1C2CCC(CC2)[C@@H]1C(F)(F)F	0.0614168
CCc1ccccc1CC(=O)N1CCC2(CC1)CC(O)c1nn(C(C)C)cc1O2	0.00428059
CCCCN1C(=O)CCC(C(=O)Nc2ncc(C)s2)C1c1ccc(OC)cc1	0.000738445
CC(C)=N/N=C1\NC(=O)C(CC(=O)Nc2cc(Cl)ccc2Cl)S1	0.00023919
Cc1nnnn1C(=Cc1cccc(F)c1)C(=O)OCc1cccc(OCc2ccccc2)c1	0.333138
O=C1CC2(CCCCC2)C(=O)N1CC(=O)N1N=C(c2ccco2)CC1c1cccs1	0.000245891
O=C(O)C1CCCN1C(=O)c1ccc([N+](=O)[O-])o1	0.0299653
Cc1cccc(NC(=O)C2CCCN(c3ncnc4oc(C)c(C)c34)C2)c1C	7.86248e-05
CNC(=O)c1ccc(CN(C)C(=O)C(C)C(N)c2ccccc2)cc1	0.000510926
Cc1ccc(SCC(=O)N(C)C2CCN(C)CC2)cc1	0.940316
CO[C@@H]1COCC[C@H]1NC(=O)c1cccc(OC(F)F)c1	0.000154798
CC(C)CCC(=O)N1CCN(c2nc3nccc(-c4ccc(C5CCCCC5)cc4)n3n2)CC1	0.000676227
C[C@@H](Nc1ccnc(C(=O)N2CCCC2)c1)c1ccccc1	0.701938
CSc1ccnc(NCC2(NC(=O)C3COCCN3C)CCC2)n1	0.539513
CCC(C(=O)Nc1cc([N+](=O)[O-])c(Cl)cc1C)N1CCCC1=O	0.00777061
O=C(NCc1ccc2c(c1)OCO2)c1cc2n(n1)CC(c1ccc(Oc3ccccc3)cc1)OC2	0.192014
Cc1ccc(C(=O)N2CCC[C@@]2(C)c2cn([C@@H]3COCC[C@H]3O)nn2)cc1S(=O)(=O)N(C)C	0.00164242
CC(C)CN1CCCN(C(=O)CCC2CCCC2)Cc2cc(F)ccc2N(C(=O)c2cccnc2)CCC1	0.973799
Cc1cccc(C(=O)N/C(=N/c2cccc(F)c2)NCC2CCCO2)c1	0.236075
FC(F)(F)c1cccc(CSc2nnc(-c3ccc[nH]3)o2)c1	0.0954116
COc1ccc(CCNC(=O)C(C)C2Sc3ccccc3N(Cc3ccc(F)cc3Cl)C2=O)cc1OC	0.000175754
COC(=O)c1ccc(C)c(NC(=O)CN(c2cccc([N+](=O)[O-])c2)S(=O)(=O)c2ccccc2)c1	0.0490571
COc1ccc(C(=O)CCC(=O)N2CCC3(CCNC3)C2)cc1F	0.0137016
CC(c1ccc(-c2nccn2Cc2ccco2)cc1)N(C)C	0.949341
COc1cc(C(=O)NCCCc2cnn(C)c2)cc(Cl)c1OCC(N)=O	0.926302
CCN1C[C@H](NC(=O)c2cnccn2)[C@@H](OC)C1	0.903113
O=C(CC12CCCCC1C2(F)F)NS(=O)(=O)c1cccc(-c2nnco2)c1	6.07585e-05
CN(C)c1ccc(C(=O)Nc2ccc(CN3CCOC3=O)cc2)cn1	0.998694
O=C(Nc1cc(C(F)(F)F)cc(C(F)(F)F)c1)c1cc(Cc2ccccc2)ccc1O	0.117424
O=C(Cn1cnc2nc(N3CCCCC3)ncc2c1=O)Nc1cc(C(F)(F)F)ccc1Cl	0.299066
CC1CC(C(=O)O)CN(S(=O)(=O)Cc2noc3ccccc23)C1	0.0230013
CC(C)(C)OC(=O)N[C@H]1CC[C@H](NC(=O)C2CCCC2)CC1	0.000798872
O=C(COCC1CC1)NCC1CCN(c2ccc(Cl)cc2)C1	0.480108
O=C(CC1(n2cccc2)CCOCC1)N1CC[C@@]2(O)CCCC[C@H]2C1	0.375173
CCCC(C)(O)CNC(=O)CC1(C(=O)O)CCC1	3.62555e-05
CCOc1ccc(N(Cc2cc3ccc(C)cc3[nH]c2=O)C(=O)c2ccncc2)cc1	0.992517
CN(Cc1ccco1)C(=O)c1ccc(Br)cc1	0.050133
Cc1ccc(NC(=O)c2nn(-c3ccccc3)c3c2CSC3)cc1	0.133239
CC(C1CCN(c2nc(N)c3cnn(C)c3n2)CC1)N1CCCC1	0.612812
Fc1ccc(CNc2ccncc2Br)c(F)c1	0.0210911
CNC(=O)c1cc(NC(=O)NCC2=CCCCC2)ccc1Cl	0.00125057
O=C1CC(CN2CCC3(CC2)CN(CC2CCCCC2)C(=O)CCO3)CN1	0.202344
COc1ccc(C2CCCN2C(=O)CC2NC(=O)c3ccccc32)cc1C	0.000274881
COc1nc(Cl)c(CO)s1	4.49748e-05
COCCOCC(=O)N1CCN(c2nc3nccc(-c4cccc(C(F)(F)F)c4)n3n2)CC1	0.0432252
CC(CC(=O)O)NC(=O)c1cccc(I)c1	0.000333503
O=C(Cc1ccc(O)c(O)c1)N[C@@H]1CCC[C@H](C2CC2)C1	0.14052
CCOC(=O)N1CCN(C(=O)COc2ccc(C)cn2)CC1	0.959523
O=C1CCN(C(=O)c2csc3nc(-c4ccc(C(F)(F)F)cc4)cn23)CCN1	0.706808
CCN1CCN(C(=O)CN2CCOCC2)CC1c1ncc[nH]1	0.955217
O=c1[nH]c(-c2ccccc2)cn2nc(-c3nc(Cc4ccc(F)cc4)no3)cc12	0.0344714
CC(=O)Nc1cccc(NC(=O)CSc2nnc(NC(=O)c3ccc(-c4ccccc4)cc3)s2)c1	0.861666
Cc1cccc(CN(Cc2cccnc2)CC2CCN(C3CCCC3)CC2)n1	0.998855
COc1ccc(N(CC(=O)Nc2c(F)cccc2F)S(=O)(=O)c2ccc(Cl)cc2)cc1	0.261216
Cc1sc2c(c1C)c(=O)n(-c1cccc(C(F)(F)F)c1)c(=O)n2CC(=O)NCc1ccco1	0.000101683
O=C(c1csc(Nc2ccc(OC(F)F)cc2)n1)N1CCN(Cc2ccccc2)CC1	0.988085
O=C(Cn1nnc2ccccc2c1=O)Nc1cc(-c2ccccc2)nn1-c1ccccc1	0.0130956
CCC(Sc1nnc(NC(=O)C2CCC2)s1)C(=O)OC	7.69139e-05
O=C(NC[C@H]1COCCO1)c1ccccc1-c1cccc2ccccc12	0.00757385
Cc1ncc(CO)c2c1Oc1nc(-c3cccc(Cl)c3)nc(SCC(=O)Nc3ccc(F)cc3)c1C2	0.388906
CCn1ncc2c1C(COC)CNC2	0.856347
O=C1NC(=O)N(c2ccc(Br)cc2)C(=O)C1=Cc1ccc(-c2ccc(C(=O)O)cc2)o1	0.985861
COc1cccc(NC(=O)N2CCN(c3cc(C4CC4)ncn3)CC2)c1OC	0.326592
COC(=O)CSc1nnc(-c2ccc(Br)cc2)[nH]1	0.022028
O=C1NC(=O)[C@@H]2CN(c3ncccc3C(F)(F)F)C[C@H]12	0.745028
CC1CC(NCc2csc(-c3ccccn3)n2)CO1	0.992659
CC(C)(C)OC(=O)N1CCC(C(=O)O)(c2ccccc2F)CC1	3.71621e-05
Nc1c(C(=O)OCc2cccc3cccnc23)cc(F)cc1[N+](=O)[O-]	0.00473207
COc1ccc2c(c1)OC1=C(C(=O)OC1)C2c1cc(OC)c(OC)c(OC)c1	0.932826
Cc1ccc(C)c(N(C)C(=O)c2c3c(cn(-c4ccc(Cl)cc4)c2=O)C(=O)CC(C)(C)C3)c1	0.00344883
Cc1nn(-c2cc(N3CCN(C(=O)c4ccc(C(C)(C)C)cc4)CC3)ccc2[N+](=O)[O-])c(=O)c2ccccc12	0.724952
COCC(NC(=O)c1cc(Cl)c(OCCC(C)C)c(OC)c1)C(=O)O	0.0638913
O=C(NCC1(C(=O)O)CC1)c1ccc(N2CCCC2=O)cc1	0.0303391
COCCN=C(N)NCc1ccc(OC)cc1OC	0.972659
Cn1cc(CCC(=O)N2CCC3(CCCN(Cc4nccs4)CCN(Cc4ccccc4)C(=O)c4ccccc4OC3)CC2)cn1	0.996369
Cc1ccc(NC(=O)c2nc3c(o2)CN(C(=O)c2cccnc2)C3)cn1	0.995959
O=C(O)CCC1CCCN(CC(=O)Nc2ccc(OC(F)(F)F)cc2)C1	0.155819
COCCNCCNC(=O)c1cc([N+](=O)[O-])ccc1OC	0.985505
CC(=O)c1cccc(OCC(O)Cn2nc(-c3ccc(C)cc3)c3ccccc3c2=O)c1	0.00498105
Cc1cccc(C2Cn3nc(C(=O)N4CCC(C(=O)N5CCN(c6cc(Cl)ccc6C)CC5)CC4)cc3CO2)c1	0.728397
CC(=O)Cn1c(=O)c2c(nc3n(CC(C)=O)c(C)cn23)n(C)c1=O	0.922672
Cc1nn(-c2ccccc2)c(O)c1/C=N/N(C)C	0.832224
Cc1cc(C(=O)N2CCCC(NC(=O)c3cncnc3C3CC3)C2C)no1	0.97281
COCc1nnc(NC(=O)[C@H](C)NC(=O)N2CCN(c3cccc(Cl)c3)CC2)s1	0.000424343
Cc1cc(NC(=O)CCc2ccccc2)[nH]n1	0.736722
Cc1ccn(CCC(=O)NC2CCCN(Cc3ccc(Cl)cc3)C2)n1	0.982584
CC(C)C1CN(CCn2cccn2)CCC(=O)N1Cc1ccc(F)cc1	0.578234
CC(C)(C)N1CCC(NC(=O)CC2CC(=O)NC2=O)CC1	0.140876
Cc1cc(Br)cc(NC(=O)NC2CCC(C(=O)O)CC2)c1	0.375084
O=C(CC1CC1)N1CCC2(CCCN(CCCc3ccccc3)C2=O)C1	1.37113e-05
CC(C)(C)OC(=O)N1CCN(CCOc2ccc(C=O)cc2)CC1	0.82401
NS(=O)(=O)c1ccc(CN2CCS(=O)(=O)c3c(F)c(N4CCCC4)nc(F)c32)cc1	0.00392494
Cc1ccc(C=CS(=O)(=O)Nc2ccc(Cc3ccncc3)cc2)cc1	0.894066
O=C1CSc2ccc(C(=O)NCC(c3cccs3)c3c[nH]c4ccccc34)cc2N1	0.0371964
CC1=NN(c2ccc(C(=O)N3Cc4ccccc4C(C(=O)O)C3)cc2)CC1	0.000725218
CC1CC1NC(=O)c1ccc(OCC2CC2)nc1	0.0460855
CCCCCc1ccc(C(=O)N2CCN(c3nc4nccc(-c5ccc(N6CCOCC6)cc5)n4n3)CC2)cc1	0.0278671
COCC1CN(CC2CC2)Cc2cn(CC3CCCC3)nc21	0.648648
Cc1cccc(NC(=O)CNC(c2ccccc2)C(C)(C)CO)c1	0.626163
CCOc1ccccc1C1C=C(C(=O)O)Nc2c(C(=O)Nc3ccc(CC)cc3)cnn21	0.00612068
O=C(NCc1nc(-c2cccs2)no1)C1CCN(Cc2ccccc2Cl)CC1	0.861605
O=S(=O)(Nc1ccc(C(F)(F)F)cc1)c1c(Cl)cccc1Cl	0.0404609
CC1(C)CN(C(=O)CC2CC(O)C2(C)C)CCC1O	0.0411928
COc1ccc(-c2cnc(CN3CCCN(C(C)=O)CC3)o2)cc1	0.992408
Cn1ncnc1CN1C[C@@H]2[C@@](C(F)(F)F)(CCCS2(=O)=O)C1	0.010259
COc1ccc(CN2CCC3(CC2)OC(=O)N2CCN(Cc4ccccc4)CC23)cc1	0.995351
COc1cc(C=C2C(=O)NN(c3ccc(C)cc3)C2=O)cc(I)c1O	0.876237
CC1CCCN1C(=O)c1n[nH]c2c1CN(C(N)=O)CC2	0.487744
COCCc1nsc(NC2CC(CNC(=O)CSC(C)C)C2)n1	0.475611
CC(C)(C)OC(=O)N1CC(OCc2ccc3ccccc3c2)CC1C(=O)O	0.000142707
CCCCc1ccc(NC(=O)CSc2nnc(-c3ccccc3Cl)n2N)cc1	0.00461151
Cc1nn(C)c2nc(C3(C)CCCN(C(=O)c4cccnc4)C3)ccc12	0.99768
CCN(CC)c1ccc2c(c1)Oc1ccc(N(Cc3ccccc3)Cc3ccccc3)cc1C21OC(=O)c2ccccc21	0.997531
CCS(=O)(=O)c1ccc2oc(=O)c(C=C(O)c3ccc(OC)cc3)nc2c1	0.000807165
ON=C1C2(CCCC2)C(=NO)C12CCCC2	0.00815948
COc1ccc(CN2C(=O)C3(OC(=O)C=C3c3ccccc3)C(=O)C2(C)C)cc1	0.000192108
COCCN1CCCC(NC2Cc3ccccc3C2)C1	0.99048
CCN(CC)C1=NC(=O)C(CC(=O)Nc2ccc(F)cc2F)S1	0.0212083
COCCc1ncc(CNc2ccc(OC(F)F)c3ncccc23)s1	0.956242
Cc1cccc(NC(=O)c2cnc(-c3ccccc3)nc2-c2ccncc2)c1	0.954053
CC1OCCCC1C(=O)N(Cc1ccccc1)CC(C)(C)O	0.0174399
Cn1nc(C2CCCN(C(=O)CCn3ccnc3)C2)n(-c2ccccc2)c1=O	0.62423
CN(Cc1cccc(Cl)c1Cl)C(=O)c1cccc2cccnc12	0.335233
COc1cc2ccc1OCC(=O)N[C@@H]1CN(C(=O)c3cnn4ccn(C)c34)CC[C@H]1Oc1ccc(cc1)CNC(=O)CC2	0.119653
Cc1ncc(Cc2noc(C34CC3COC4(C)C)n2)o1	0.271351
O=C(CNc1ccc2ccccc2c1)NN=CC=Cc1ccccc1	0.977781
CC(=O)N1CCC(Nc2ccnc3ccsc23)C1	0.568936
COc1cc(F)cc(CNC2CCN(C(C)(C)C)C2=O)c1	0.00965734
CCCCN(CCCC)c1nc(SC)nc2c1sc1nc(C(C)C)c3c(c12)CC(C)(C)OC3	0.986655
CO[C@H]1CC[C@H](NC(=O)CN(C)Cc2ccncc2)CC1	0.255796
Cc1ccc(SCCOc2ccccc2C=NNC(N)=O)cc1	0.987236
Cc1cc(C(=O)O)cc(S(=O)(=O)NCC(C)Cn2cccn2)c1C	0.0171329
Clc1cccc(-c2cnn(-c3ccc(Cl)c(Cl)c3Cl)c2)c1	0.276677
O=C(CCN1C(=O)C(=Cc2ccccc2Cl)SC1=S)N1CCC(Cc2ccccc2)CC1	0.915032
O=C(NC(CC1CC1)C(=O)O)C1=Cc2ccccc2OC1	0.0253217
Cc1cc2cc(CC(C#N)C(=O)Nc3c(C)cccc3C)c(Cl)nc2cc1C	0.866221
Cc1ccc(-n2ncc(C(=O)N3C[C@@H]4CCC[C@]4(CN)C3)c2C)cc1	0.04844
O=C(NC1CCN(c2cnccn2)CC1)c1cc2ccccc2oc1=O	0.629124
CN1C(=O)/C(=C2/Sc3ccccc3N2CCCS(=O)(=O)O)SC1=S	0.518731
COCC(C)(NC(=O)CNC(=O)NC1CCCCC1)C(=O)O	0.0026638
C#CCCC1(CCC(=O)N(C2CNC(=O)C2)C(C(=O)NCC)c2c(C)noc2C)N=N1	0.0153124
O=C(C=Cc1cn(-c2ccccc2)nc1-c1ccc(-c2nn(-c3ccccc3)cc2C=CC(=O)c2ccccc2)cc1)c1ccccc1	0.971266
Cc1ccc(C(=O)N2CCC(N3CC(F)(F)C[C@H]3CO)CC2)cc1	0.0870022
CCC(C)N(Cc1ccc(OS(=O)(=O)c2ccc(F)cc2)cc1)C(=O)c1cccc2ccccc12	0.00839553
Cc1ccc2nc(N3CCCC(C(=O)NCCCN4CCN(c5ccccc5)CC4)C3)[nH]c2c1	0.995282
COc1cc(OC)cc(C(=O)Nc2c(C(=O)N3CCOCC3)oc3ccccc23)c1	0.0417923
O=Cc1ccn2cc(Br)nc2c1	0.047205
O=C(NCC(F)(F)F)c1cc(Cl)ccc1Cl	1.31459e-05
O=C(CCSc1ccccc1)N1CCC(n2c(=O)[nH]c3ccc(F)cc3c2=O)CC1	0.00855572
COC(=O)c1[nH]c2cc(OC)ccc2c1NC(=O)C(C)N1CCc2ccccc2C1	0.682814
COc1ccc(Cl)cc1NC(=O)c1ccc(CSc2nnnn2C)cc1	0.0936374
CC1CN(C)CCN1C(=O)C1(NS(C)(=O)=O)CCCCC1	0.633851
CC(C)C[C@H](NC(=O)Cn1ccc2c(Cl)cccc21)c1nnc2ccccn12	0.0452447
CCOc1cc(C(=O)O)ccc1OC(=O)c1cccc(Cl)c1	0.046733
COc1ccccc1N1CCN(S(=O)(=O)c2cc(Cl)ccc2C(F)(F)F)CC1	0.000352879
O=c1c2cc3c(=O)n(-c4ccccc4)ccc3nc2ccn1CCc1ccccc1	0.973584
O=C(CCC(=O)N1CCN(c2ccccc2)CC1)N1CCN(c2ccccc2)CC1	0.892506
COc1ccc(NC(=O)C(C)OC(=O)CCc2cnn(-c3ccccc3)c2)cc1	0.545402
CNC(=O)C1CCN(C(C)c2nnc(-c3ccccc3)o2)CC1	0.527479
CCCc1cc(C(=O)O)cc(Cl)n1	0.00210823
O=C(CN1CCCC2(CCC(=O)N(C3CC3)C2)C1)NCc1ccccc1	0.0156165
COc1ccc(C=C(C#N)S(=O)(=O)c2ccccc2)cc1CN1CCSCC1	0.801224
CC(C)C(=O)N1CCCNC(=O)[C@H](Cc2ccccc2)NC(=O)CN(C)C(=O)[C@H](C(C)C)NC(=O)[C@H]1C	5.27681e-05
COc1ccccc1CN(CCCO)C(=O)c1cc(C)nc2cc(F)ccc12	0.986284
C[C@@](Cc1ccc(Br)cc1)(NC(=O)OCC1c2ccccc2-c2ccccc21)C(=O)O	0.000422299
CCc1cccc(NC(=O)NC2CCN(c3ccc(F)c(C)c3)C2=O)c1	0.00564987
O=C(Nc1nc(CCC(=O)N2CCc3ccccc32)cs1)c1cccs1	0.690361
COC(=O)c1ccccc1C1CN(C(=O)C2(Cc3ccccc3)CCOC2)C1	0.000178577
Cc1nnnn1C(Cc1ccc(F)cc1)C(=O)N1CCC(CN2CCOCC2)CC1	0.0551231
O=C(NCc1ccc(Cl)cc1)c1ccc(CN2CCCCC2)cc1	0.00684772
COc1ccccc1C=C1N=C(c2cc(OC)c(OC)c(OC)c2)OC1=O	0.998369
CCCCCCCN1C(=O)/C(=C/c2cn(-c3ccccc3)nc2-c2ccc(OCc3ccc(Cl)cc3)cc2)SC1=S	0.95711
Cc1ccc(-c2nc(CNC(CC(C)C)C(=O)O)cs2)cc1	0.849024
CCOC(=O)c1ccc(/N=C2/SC(C(=O)Nc3ccc(C(=O)OCC)cc3)CC(=O)N2Cc2ccccc2)cc1	0.00221919
COc1ccc(COC(=O)NN=C(C)CC(=O)NCc2ccco2)cc1	0.077915
COc1ccc(CNCCCN2CCCC2=O)cc1OCc1cccnc1	0.995425
Cn1c(NC(=O)c2ccccc2-n2ccc(C3CC3)n2)nc2cnccc21	0.314925
CC(CC(=O)O)NC(=O)CC(C)NC(=O)C1CCCC1	4.74996e-05
O=C(Nc1ccc(-c2ccc(Cl)s2)nc1)N1CCN(C2CCNC2)CC1	0.975635
N#CC(=Cc1cn(Cc2c(Cl)cccc2Cl)c2ccccc12)c1nc2ccccc2[nH]1	0.575225
COc1ccc(N2CC3(CN(C(=O)Cc4csc(C)n4)C3)C2)cc1	0.820395
CCS(=O)(=O)c1ccccc1CC(=O)N1CCC(C(F)(F)F)C1	9.28697e-05
NC(=O)c1cc(NCc2ccc(Cl)cn2)nc2ccccc12	0.779775
O=C(Nc1ccccc1-c1cn2ccsc2n1)c1ccc(-n2cccc2)cc1	0.960091
COc1cccc(/C=c2/sc3nc(-c4ccc(Br)cc4)nn3c2=O)c1	0.958582
CSc1cccc(NC(=O)Cn2ccn(-c3ccc(Br)cc3)c(=O)c2=O)c1	0.0122543
N#CCCCCCOc1ccc(F)cc1	0.000966617
CCN(CC(=O)Nc1c(F)cccc1F)C(=O)Cc1cc(=O)oc2cc(OC)ccc12	0.864188
CC(NCCCc1c(F)cccc1Cl)C(=O)O	0.0017935
CCn1cc(C(=O)Nc2ccc(SC(C)(C)C)cc2C)nn1	0.0968882
Cc1c(Cl)cccc1NC(=O)CSCc1nc(-c2cccc(F)c2)no1	0.0561858
CCc1ccc(C(NC(=O)NC2CCC(C(=O)O)CC2)C(C)C)cc1	0.000438503
O=C(C1CCCO1)N1CCC2CCCCC21	0.000186853
CCOC(=O)[C@@]1(Cc2ccccc2)C[C@H]2CC[C@@H]1N2C(=O)c1ccn(CC)n1	0.304041
O=[N+]([O-])c1ccc(/C=N/Nc2nnnn2-c2ccccc2)cc1	0.989659
CCCOC(=O)[C@H]1[C@H]2C(=O)N(c3ccccc3CC)C[C@]23C=C[C@H]1O3	0.000309397
Cc1sc(N)nc1C(=O)O	0.00940851
COc1ccc(C(=O)N2CCN(Cc3nc(-c4cccc(F)c4)oc3C)CC2)cc1	0.889752
Cc1[nH]c(C)c(S(=O)(=O)NCCC(=O)Nc2cccc(F)c2)c1C(=O)N1CCCC1	0.00106577
N#Cc1cc(C(=O)Nc2ccccc2)c(N)nc1SCC(=O)NCC(=O)O	0.148238
CC(C(=O)NCCCN(C)S(C)(=O)=O)n1cnc2ccccc21	0.000419215
C=CCc1cc(C=O)cc(OC)c1OCc1ccc([N+](=O)[O-])cc1	0.986047
CC(C)(C)C(=O)NCc1nc(Cc2cccc(OC(F)(F)F)c2)no1	4.00253e-05
C=CCCC(NC(=O)CCc1ccc(S(N)(=O)=O)cc1)C(=O)O	4.16201e-05
Cc1ccc2c(c1)NC(=O)c1cc(NC(=O)c3cccc(C(F)(F)F)c3)ccc1O2	0.956387
CCOC(=O)CCC(C)Sc1nc(C)c(C(=O)OCC)cc1C#N	0.680497
O=C(c1cccnc1NC1CC(F)(F)C1)N1CCc2ccccc21	0.721232
N#Cc1cccc(C(=O)Nc2ccc(S(=O)(=O)Nc3nccs3)cc2)c1	0.00570206
CCC1=C(OC(=O)c2ccccc2)C(C)(C)C(c2ccccc2)OC1=O	0.291874
CCC(=O)Nc1ccc(NC(=O)N2CC(C)OC(C)C2)cc1	0.549925
Cc1nn2cccnc2c1C(=O)NCCCc1nc2ccccc2n1C	0.569506
COC(=O)C(Br)c1cccc(Cl)c1	0.00406744
CCc1ncc(Cl)c(C(=O)N2CCCC(F)(CO)C2)n1	0.98775
Cc1cc(C2CCC2)oc(=O)c1C(=O)N1CCC(OC(F)(F)F)CC1	0.0878998
Cc1cc(C(C)(C)C)cc(C)c1S(=O)(=O)N1CCN(C(=O)c2ccc(NC(=O)c3cc(Cl)cc(Cl)c3)cc2)CC1	0.376114
Fc1cccc(C2CNCCN2Cc2ccc3c(c2)CCO3)c1	0.993753
CN(Cc1ccco1)C(=O)CCC[C@H]1NC[C@@H]2C[C@H]1CN(Cc1cccnc1)C2	0.992625
CN(C(=O)NCCc1cc(Cl)c2c(c1)OCCO2)C1CCN2CCOC1C2	0.767843
Cc1nn(CC(C)C)c(C)c1CCC(=O)Nc1ccc(NS(C)(=O)=O)cc1	0.00012523
COc1ncccc1CNCCN1CCCCC1CO	0.998146
C=CCn1/c(=N/C(=O)C(C)(C)C)sc2cc(OCC)ccc21	0.0477369
Cc1ccc(C(=O)N2CCc3cc(-c4csc(NC(=O)Cn5nnc6ccccc65)n4)ccc32)cc1	0.290231
COc1ccc(Cn2c(C)nc3cc(NC(=O)Nc4ccccc4Cl)c(C)nc32)cc1	0.608457
Cn1nc(C(=O)N2CCSCC2)c2ccccc21	0.962961
COc1ccc(NC(=O)CSc2nc(-c3cccnc3)n[nH]2)cc1	0.124134
Cn1c(=O)[nH]c(=O)c2c1nc(N/N=C1\C(=O)Nc3ccccc31)n2CCc1ccccc1	0.995803
CC(=O)Nc1ccc(N(C(=O)Cc2cccs2)C(C(=O)NC2CCCC2)c2ccc(C)cc2)cc1	0.000147154
O=C1/C(=C2\SC(=S)N(C3CCS(=O)(=O)C3)C2=O)c2ccccc2N1Cc1ccccc1F	0.000200622
O=C(c1ccncc1)N1CCO[C@@H](CN2CCC(O)CC2)[C@@H]1c1ccccc1	0.372984
CCOC(=O)[C@H](Cc1c[nH]cn1)NC(=O)Cn1c(C)cc(O)cc1=O	0.245203
CCN(CC)Cc1ccc(C(=O)O)s1	0.000141526
CC(F)(F)CCNc1nc(-c2ccccn2)nc2sccc12	0.0950295
COc1cc(NCCC(=O)O)ccc1Cl	0.0222761
Cc1ccnc(NS(=O)(=O)c2ccc(NS(=O)(=O)c3ccc([N+](=O)[O-])cc3)cc2)n1	0.815809
COc1ccnc(N2CCN(Cc3ccc(C#N)cc3)CC2)n1	0.146053
COc1cccc(C=C2SC(=O)NC2=O)c1OCCCC#N	0.9782
Cc1cc(C(=O)OCC2CCC(C(=O)O)CC2)nc(S(C)(=O)=O)n1	0.00696577
CC(Oc1ccc(Cl)cc1Cl)C(=O)NCc1nncn1-c1ccccc1	0.000415472
Cc1c2cnn(-c3ccccc3)c(=O)c2c(C)n1CCCC(=O)Nc1ccccc1C(F)(F)F	0.0251228
COc1ccc(C2OCC3(CO2)CSc2ccccc2C3=O)cc1	0.629358
CC1Cc2[nH]ncc2CN(C(C)C(=O)Nc2ccc(F)cc2F)C1	0.181193
Cc1ccc2oc(C(=O)NC(CO)Cc3c[nH]c4ccccc34)cc2n1	0.714472
COc1ccc(C(=O)NCC(=O)NNC(=O)c2ccc(COc3ccc(Cl)cc3)cc2)cc1OC	0.254583
Oc1ccc(Br)c(CN2CCOC(C3CCCO3)C2)c1	0.711161
O=C(Nc1ccc(CC(=O)N2CCSCC2)cc1)c1ccc(-c2ccncc2)s1	0.907902
CC(C)(CO)CNC(=O)C1CC(=O)N(C2CC2)C1	6.19599e-05
C=C(C)[C@H]1C[C@H](c2ccc(Cl)cc2)[C@@H](CCC)O[C@@H]1c1cc(CC(=O)O)ccc1OCc1cccc(Cl)c1	0.579701
O=C(C1CCOC1)N1CCCC(c2nc(-c3cccc(F)c3)no2)C1	0.00011797
CCOc1ccc2ccccc2c1C(=O)NCCSC	0.00486266
Nc1ccc(-n2cc(Cl)c(F)n2)cc1Cl	0.0185469
CCC(=O)c1ccc(OCC(=O)N(C)Cc2ccccc2O)cc1	0.0344426
O=C(ON=C1CC2CCCC(C1)N2Cc1cccs1)c1ccc(F)cc1	0.884798
CSc1ccc(-c2noc(-c3ccc(Br)cc3)n2)cc1	0.962374
COc1ccc(-n2c3nc(=O)[nH]c(=O)c-3cc3cc([N+](=O)[O-])ccc32)cc1Cl	0.679366
NC1CCCc2cn(Cc3ccccc3)nc21	0.146535
COc1ccc2c(c1)CC/C(=C\C=C\c1ccccc1)C2=O	0.848622
Cc1nn(Cc2ccccc2)c(C)c1CNC(=O)c1ccc2c(c1)OCC(=O)N2	0.000911517
Cc1ccc(NC(=O)C2C3NC(=O)N(c4cccc(Cl)c4)C2(C)Oc2ccccc23)c(C)c1	0.000710505
CS(=O)(=O)Nc1ccc(O)c(C(=O)Nc2cc(C3CCC(F)(F)CC3)n[nH]2)c1	0.00123754
CCc1nc(C)c(C(=O)N[C@@H]2COCC[C@H]2Oc2ccc(C#N)cc2)o1	0.157664
Cc1cc(C)c2nc(N3C(=O)C(=O)C(=C(O)c4ccc5c(c4)OCCO5)C3c3ccc([N+](=O)[O-])cc3)sc2c1	0.997828
COc1cc(C(=O)N2CC3(CCN(C(=O)c4cnc(F)c(Cl)c4)CC3)C2)cc(F)c1F	0.99101
COc1ccc(/C=N/NC(=O)/C(=C/c2ccc(N(C)C)cc2)NC(=O)c2ccccc2)cc1Cl	0.923365
Cn1c(C2CCCN2C(=O)[C@H]2C[C@@H](C(=O)O)C2)nc2ccccc21	0.370302
c1cc(N2CCN(c3nccn4c(-c5cnccn5)nnc34)CC2)c2cc[nH]c2c1	0.880173
COc1cccc(CN(Cc2ccco2)S(=O)(=O)c2ccccc2)c1	0.065916
COc1ccc(F)cc1C(C)NC(=O)C1CC12CCNCC2	0.500326
CC(C)(C)OC(=O)N[C@H](CCC(N)=O)CC(=O)O	0.00319411
Cc1[nH]nc2c1C(c1ccc(F)cc1)C(C#N)=C(N)O2	1.96875e-05
CC1(C)C(=O)N(Cc2ccc(Cl)c(Cl)c2)c2ccccc2N1C(=O)c1cccc([N+](=O)[O-])c1	0.0128166
CN(CCCOc1ccc(S(C)(=O)=O)cc1)C(=O)NCC1CCCC1	0.000103246
CC(CO)(CO)NC(=O)c1cc2cc(F)ccc2o1	3.01356e-05
COCC(N)c1ccc2[nH]ccc2c1	0.99391
CC(=O)Nc1c(C)nn(CC2CC2)c1C	0.00319369
C=CCNCCC1CCC(=O)N1CCCSC	0.0365029
Cn1c(SCC(=O)O)c2c3c(cccc31)C(=O)c1ccccc1-2	0.0128912
COc1cccc(NC(=O)CN(c2ccccc2)S(C)(=O)=O)c1	0.0017342
Cn1nc2c(c1NC(=O)c1cc3cc([N+](=O)[O-])ccc3s1)CCC2	0.570814
CC(N)C(C)C(=O)N1CCCC(N2CCCC2)CC1	0.47186
COC(=O)c1ncc(F)cc1N	0.67707
CCOc1ccccc1-n1c(SCC(=O)NC)nnc1-c1ccco1	9.61017e-05
O=c1c2ccsc2ncn1Cc1nc(-c2ccccc2)c2ccccc2n1	0.214455
CCOCCCN(CCCNC(=O)C1CCN(C(=O)c2nnn3c2COC(c2cc(OC)ccc2OC)C3)CC1)Cc1ccco1	0.892918
COc1cc(OC)cc(-c2nnc(SCc3cccc(C)c3)n2-c2ccccc2C)c1	0.375948
COC(OC)C(=O)c1ccccc1NC(C)=O	0.0200871
Cc1cc(S(=O)(=O)Nc2ccc(C(=O)NCc3cccnc3)cc2)ccc1F	0.449627
O=C(NCCc1c[nH]c2ccc(Cl)cc12)C1CCCN(C(=O)c2nnn3c2COC(c2ccc4c(c2)OCO4)C3)C1	0.346365
Cc1cc(C=NNC(=O)c2cc(C)n(-c3ccccc3)c2C)c(C)n1-c1ccc(Br)cc1	0.283112
O=C(Cn1cnc2nc(N3CCOCC3)sc2c1=O)Nc1ccc(F)cc1F	0.00145416
Cc1ccc(S(=O)(=O)NN=Cc2c(O)ccc3oc4c(c23)CCCC4)cc1	0.0125574
COc1cc2c(cc1OC)C(CC(=O)O)N(C(=O)CCc1ccccc1C)CC2	0.107549
CCc1ccc(CN2C[C@@H](N)[C@H](c3cnn(C)c3)C2)s1	0.912587
C(=Cc1ccccc1)CN1CCC(C2CCCN2)CC1	0.997752
CO[C@@H]1CC[C@H](C(=O)N2CCCC2)C[C@H]1NC(=O)c1cnc2c(c1)CCCC2	0.941787
Cc1cnc(N2CCC(C(C)(C)F)CC2)s1	0.315255
COC(=O)c1cccc(S(=O)(=O)Nc2cccc(NC(C)=O)c2)c1	0.215066
Nc1c(C(=O)NCCNC(=O)c2nnn(-c3ccc(Cl)cc3Cl)c2N)nnn1-c1ccc(Cl)cc1Cl	0.968757
CC(NCc1nnc2n1CCCCC2)C1OCCc2sccc21	0.196293
Cc1noc(NS(=O)(=O)c2ccc(NC(=O)c3ccccc3NS(=O)(=O)c3ccc(Cl)cc3)cc2)c1C	0.359815
CCOC(C)c1nc(-c2ccnc(C)n2)n(-c2ccc(F)c(Cl)c2)n1	0.0199742
COCCn1cnc2c(Nc3ccc(F)cc3)ncnc21	0.459494
CC(C)C[C@H](NC(=O)c1ccc(C#N)cc1)C(=O)O	0.00299977
Cc1cn(C(C)(C)C(=O)NCc2nc3cccnc3[nH]2)cn1	0.593902
O=C(NC(C(=O)N/N=C/c1ccc(Br)cc1)c1n[nH]c(=O)c2ccccc12)c1ccccc1	0.000324568
CN1CCCN(C(=O)c2cc(F)ccc2F)c2ccccc21	0.997488
O=S(=O)(Nc1ccc2cn[nH]c2c1)C1=Cc2ccccc2CC1	0.399124
CC(C)Nc1nn(CN2CCN(S(=O)(=O)c3cccc(F)c3)CC2)c(=S)s1	0.0111218
Cc1c(C)n(-c2cc(F)cc(F)c2)c2ncnc(Cl)c12	1.16272e-06
Nc1cc(Cl)c(F)cn1	0.0993163
O=C(Cc1ccn[nH]1)N1CCCC(NC2CCN(C3CCC3)C2=O)C1	0.038547
O=C(Cc1ccsc1)N1CCN(Cc2nc[nH]n2)CC1	0.937197
CCCNC(=O)CN(C)S(=O)(=O)c1ccc(Br)cc1	0.000288469
CC(NC(=O)C(C)(C)N)c1ccc(NC(=O)Nc2ccccc2)cc1	0.914312
CC(N1CCN(c2ccccc2N)CC1)C(F)(F)F	0.815844
Nc1c(NC(=O)NCCc2ccc(Cl)cc2Cl)c(-c2ccccc2)nn1-c1ccccc1	0.00111049
CCC(C)(OC)C(=O)NCc1cnoc1C	6.22007e-05
Cc1ccc(NC2CCNCC2)cc1I	0.959724
C=CCOc1ccc(/C=C(\C#N)c2nc(-c3ccc(C)cc3)c(NC(C)=O)s2)cc1	0.00387644
Cc1cc(C)n2nc(SCCCC(=O)c3ccc(Br)cc3)nc2n1	0.621926
CCCN(CCc1nc(-c2ccc([N+](=O)[O-])cc2)no1)C(=O)c1ccccc1Cl	0.988874
CC(=O)O[C@@H]1CN(Cc2ccccc2)C[C@H]1OC(C)=O	0.980162
O=Cc1ccc(-c2cc3[nH]c(=O)[nH]c3cc2[N+](=O)[O-])o1	0.939146
COCc1ccccc1-c1noc(C2(C)CCNCC2)n1	0.991118
CCC(CNC(=O)C(C)C(C)N)Oc1ccccc1Cl	0.00358629
Cc1cccc(-n2nc(C)c3c(C)cc(=O)oc32)c1	0.0126282
COc1ccc(C(C)=O)cc1NC(=O)c1ccco1	0.0710614
Brc1ccc2nc3oc4ccc5ccccc5c4cc-3c2c1	0.997561
Cc1ccc(CN2CCCN(C(=O)c3cnsn3)CC2)cc1	0.579111
CC(C(=O)N1CCc2ccccc2C1)N(c1ccc(Oc2ccccc2)cc1)S(C)(=O)=O	0.000978174
CCOC(=O)C1=C(C)N=c2sc(=CC=Cc3ccccc3)c(=O)n2C1c1cccc(OC)c1OC	0.352251
O=C(O)CCCCCNC(=O)Cc1cc2c(ccc3ccccc32)o1	0.0785821
Fc1ccc(CNC(=S)Nc2ccccc2Cl)cc1	0.927268
O=C1CC(C(=O)NCc2ccoc2)c2ccccc2N1	0.0166161
CN(C)c1cc(NCc2ccco2)ncc1Br	0.190598
Cc1ccc(Oc2ccc(OCC(=O)NCCc3ccncc3)cc2)cc1	0.986814
CCc1ccc(-c2nc(CN(CC(=O)O)C(C)C)cs2)cc1	0.649437
CCOc1ccc(NC(=O)c2ccccc2Cl)c2cccnc12	0.937681
O=C(CCCC1CNCCO1)Nc1cccc(-c2nc3cc(Cl)ccc3[nH]2)c1	0.999466
CC(=O)NC(CC(C)C)c1ccccc1	0.0292816
Cc1cc(N/C=C(/C#N)c2nnn[nH]2)c2ccccc2n1	0.925719
CC(NC1(C)CCOC1C)c1cn(-c2ccccc2)nn1	0.768179
CCCn1nc(NC(=O)COC)c2cc3cc(C)ccc3nc21	0.81014
CC(C)Sc1ccc(CC(=O)NCCc2ccoc2)cc1	0.0134741
CCOc1ccc(C=NNC(=O)Cn2cnc3scc(-c4ccccc4)c3c2=O)cc1OCC	0.99411
CC(C)S(=O)(=O)N(C)CCC#N	0.00260311
Cc1ccc(C(=O)N2c3ccccc3CC2C)cn1	0.998586
CCS(=O)(=O)N1CCC(N2C(=O)C3(CCCCC3)C2c2ccccc2)CC1	0.000224358
COc1cccc(N2CCN(c3cc(SCC(=O)N4CCOCC4)ncn3)CC2)c1	0.206563
CCc1cccc(NC(=O)N2CCCn3cnc(CN(C)C(C)C)c3C2)c1	0.946769
CCN(C(=O)CSC1=NC(C)(C)Nc2ccccc21)c1ccccc1	0.409727
Cc1cc(C)c(C=C2SC(=S)N(c3cccc(C(F)(F)F)c3)C2=O)c(C)c1	0.961694
CCCCCCCCCCNS(=O)(=O)c1ccc(Br)cc1CC	1.31442e-05
COc1ccc(C=CC(=O)c2ccc(O)cc2O)cc1	0.937711
Cn1cc(-c2ccc(F)c(C(=O)NC3CC(C#N)(c4ccccc4)C3)c2)cn1	0.000152738
CSc1ccc([C@@H](C)NC(=O)N2CCCC2c2ccncc2)cc1	1.03898e-05
Cc1cccc2nc(CNC(=O)c3ccc4c(c3)n(C)c(=O)n4C)cn12	0.203049
Nc1c(C(=O)NCCC2=CCCCC2)c2nc3ccccc3nc2n1/N=C/c1ccco1	0.384504
Cc1cc(C(=O)NCCN2C(=O)CSC2=O)c2c(C)nn(C)c2n1	0.997233
CNC(=O)NC1CCCN(Cc2nc(-c3ccccc3)cs2)C1	0.997137
COCCNC(=O)N1CCC(c2nnc(C3CC3)o2)CC1	0.0119518
O=C(CCCSc1nc2ccccc2[nH]1)Nc1nc2ccccc2s1	0.990919
COc1cncc(-c2cc(NCc3cccnc3)nc3[nH]ccc23)c1	0.989684
Cc1ccc(NS(=O)(=O)c2c[nH]c3cccc(F)c23)cc1C(=O)O	0.0647553
FC(F)(F)C1(C(F)(F)F)OC(c2cccc(Cl)c2)=Nc2ccc3ccccc3c21	0.692069
CCOC(=O)c1s/c(=N\C(=O)c2cccc(OC)c2)n(C)c1C	0.906925
COc1ccc(-c2[nH]c(-c3ccc(-c4[nH+]c(-c5ccc(OC)c([O-])c5)[nH]c4-c4ccccc4)cc3)c(-c3ccccc3)[nH+]2)cc1[O-]	0.999882
CC(C)(C)OCC(C#N)NC(=O)OC(C)(C)C	0.00448247
CCn1nc(C)c(CCN(C)c2ncc(C(=O)O)cc2NS(=O)(=O)c2ccc(F)c(F)c2)c1C	0.00498428
COc1ccc2nc(CNC(=O)CC3CCN(Cc4ccccc4)CC3)[nH]c2c1	0.990621
CC(N)C(C)C(=O)N1CCN(c2ccc(C(F)(F)F)cc2[N+](=O)[O-])CC1	0.5348
CC(C)c1nc2cc(NC(=O)c3ccccn3)ccc2[nH]1	0.989206
Cc1cc(C)n(CC2CCCN2CC(=O)Nc2c(C)n[nH]c2C)n1	0.646403
CSc1ccc(CNC(=O)C2CCN(c3c(NC(C)=O)c(C)nn3-c3ccccc3)CC2)cc1	0.0294617
N#Cc1ccc(OCC(=O)NNC(=O)CSc2nc(N)cc(N)n2)cc1	0.000640855
Cc1ccc(CNC(=O)c2nc(-c3oc4c(C)cccc4c3C)no2)cc1	0.00571799
Cc1ccc(Cl)cc1N1CCN(CCNC(=O)C2=Cc3sc4c(c3CS2)CCCC4)CC1	0.990289
CC(C)C(NC(=O)NC1CCCc2occc21)c1ccccc1	0.000195108
COCCN1C[C@H]2CC[C@@H]1CN(c1cc(C(F)(F)F)cc(C)n1)C2	0.950176
Cc1ccc(C)c(C2Cn3nnc(C(=O)N4CCC(C(=O)NCCCOC5CCN(C)CC5)CC4)c3CO2)c1	0.603191
CC(C)c1ccc(NC(=O)C2CCCN(C(=O)c3cc4n(n3)CC(c3cc(Cl)ccc3Cl)OC4)C2)cc1	0.914322
[truncated: 8,002 more rows]

## Sheet: Dataset_2
Infromation of 5,000 randomly sampled compounds from the CSTAR library
SMILES	RiboBIND_score
Cc1cccc(NCC2CCC3(CCOCC3)C2O)n1	0.987231
CCOCC(=O)Nc1cccc(CN2CCCC2)c1	0.634168
O=C(O)COc1ccccc1CN1CCCCC1c1ccn[nH]1	0.890339
Cc1ccc(C2Cn3nnc(C(=O)N4CCC(C(=O)N(C)CC(=O)N5CCN(C)CC5)CC4)c3CO2)cc1C	0.952076
CCOC(=O)C1(CCCc2ccccc2)CCN(C(=O)c2ocnc2C)CC1	0.97547
CC1CN(C(C)(C)CNC(=O)c2csc(CN)n2)CC(C)O1	0.948783
CCOc1cc(C(=O)OC)cc(NC(=O)C2CCN(C(=O)c3ncn4c3COC(c3ccc(OC)c(OC)c3)C4)CC2)c1OCC	0.627084
Cc1noc2nc(C3CCN(Cc4ccncc4)CC3)cc(C(F)F)c12	0.954324
CN(c1ccc(O)cc1)c1nc(-c2cccs2)cs1	0.938905
COc1ccc(-c2cn3cc(Cl)ccc3n2)cc1	0.995358
CC(C)[C@@H](N)C(=O)N(C)CCOc1ccccc1Cl	0.554419
COc1ccccc1CCN1CCCC(CN(C)C(=O)C2=NNC(=O)CC2)C1	0.914712
COc1ccc(NCN2C(=O)C3C4c5ccccc5C(c5ccccc54)C3C2=O)cc1	0.853834
N#Cc1cc(NCCc2nc3cc(F)ccc3[nH]2)ccc1[N+](=O)[O-]	0.60668
Fc1cccc(Cl)c1CSc1nc2ccccc2s1	0.992923
CC(=O)Nc1ccc(S(=O)(=O)N(C)c2ccc(O)cc2)cc1	0.846919
NCC1CCN(Cc2nc(-c3ccccc3)cs2)CC1	0.997152
CN(C)C(CNC(=O)COc1ccc(C(=O)c2ccccc2)cc1)c1cccs1	0.848954
COc1ccc(OCC(=O)Nc2cccc(N3CCn4c(nc5cc(Cl)ccc54)C3)c2)cc1	0.625883
Cc1cc(=O)c(C(=O)N2CCCC(c3nc4ccccc4s3)C2)nn1-c1ccccc1Cl	0.913731
CCCCCCOc1ccc(C(=O)Oc2ccc3c(=O)c(Oc4ccc(Cl)c(C)c4)c(C(F)(F)F)oc3c2CN2CCOCC2)cc1	0.67484
COc1ccc(C(=O)N2CCCC(c3ncc(C(N)=O)c(C)n3)C2)cc1Cn1cccn1	0.937993
O=C(C1=Cc2cc(Cl)ccc2OC1)N1CCN(CCO)CC1	0.994788
CN(C)C1CCC2C(C1)OCCN2CC(=O)NC(C)(C#N)C1CC1	0.641568
CC1CN(CCCNc2nccn3nc(C4CC4)cc23)CC(C)O1	0.923906
O=C(NCc1ccco1)C1CCCN(c2ccc([N+](=O)[O-])cn2)C1	0.928462
Brc1ccc(CNC2CCCNC2)cc1	0.99552
N#Cc1cnc(N2CCCN(Cc3cccs3)CC2)c(Cl)c1	0.899266
O=C(NCC(Cc1cccc2ccccc12)C(=O)O)c1cccnn1	0.544395
C=CCOc1cccc(/C=C/C(=O)c2ccc(C)cc2)c1	0.825695
Cc1n[nH]c(SC(=Cc2ccccc2Cl)C(=O)[O-])[nH+]1	0.572894
CC(=O)NC1(c2noc(C)n2)CCN(Cc2nc3c(s2)CCC3)C1	0.996585
COc1ccc(C(=O)N2CCN(c3cc(-c4ccc(F)cc4)n[nH]3)CC2)cc1	0.939857
O=C1Nc2ccccc2SC1N1CCCCC1	0.969453
CCC(NCCc1c[nH]c2ccccc12)c1nnnn1-c1ccc(N2CCOCC2)cc1	0.877822
COc1ccc(CC(=O)N/N=C/c2cc(Br)cc(Cl)c2O)cc1OC	0.896252
Cc1ncc(C(=O)Nc2ccc(C(=O)N3CCOCC3)c(F)c2)c(C(C)C)n1	0.982503
COC1CCN(CCOc2cccc(C(=O)O)c2)CC1(C)C	0.615823
CC(C)c1[nH]ccc1C(=O)N1CCCCC1c1ncccn1	0.790612
OCc1cc(CCNc2ncnc3cc(F)c(F)cc23)ccc1O	0.520984
CCOc1cc(-c2noc(-c3ccc(Br)cc3)n2)ccc1OC	0.983002
Cc1cc(C(=O)N2CCCCC3CCCCC32)nn1C(C)(C)C	0.727127
COc1ccc(CCNC(=O)Cn2cccc2C=O)cc1OC	0.832931
COc1ccc(Nc2cc(C(=O)NCCCN3CCCC3)c3ccccc3n2)c(OC)c1	0.983159
O=C(Nc1ccc(N2CCOCC2)cn1)c1ccc(CN2CCCCC2)o1	0.952887
Cc1cccn2c(=O)c3cc(C(=O)NC4CCCCC4)c(=N)n(CCCOC(C)C)c3nc12	0.999422
O=C(COc1ccc(N2CCCC2=O)cc1)NCC1CCCN1	0.853407
CCCN(C(=O)CSC(C)C(=O)Nc1cc(C)on1)C1CCNC1	0.92095
CNC(=O)c1ccc(CN(C)C(=O)c2cn(C)c(C)c(Br)c2=O)o1	0.990948
Cc1cc(O)c(OCC(=O)Nc2cccc(C(=O)c3nccn3C)c2)cn1	0.998658
c1ccc([C@H]2COC[C@H]3CNCCN32)cc1	0.720442
Cn1cnc(CNC2CCCOc3cc(F)cc(F)c32)n1	0.978811
OCCC(NCC1CCOC1)c1ccccc1	0.829799
COc1ccc(NC(C)=O)cc1NC(=O)CN1CSCCSC1	0.660049
Cc1ccc(NC(C)(C)C(=O)N2CCN(c3ncnc4ccccc34)CC2)cc1	0.818859
O=c1nc2ccccn2c2ccc(S(=O)(=O)N3CCCc4ccccc43)cc12	0.810083
CCn1cc(C(=O)NCc2ccc(CN3CCN(C)CC3)cc2)nn1	0.982527
COc1ccc(C=CC(=O)C2(C)CCCCC2)cc1	0.879454
CCOc1ccc(/C=C/C(=O)Nc2nc(-c3ccc4c(c3)NC(=O)C(C)O4)cs2)cc1OC	0.748791
CC(=O)Nc1ccc(C)c2c1CCCN2C(=O)c1ccc(F)cc1Cl	0.931768
CCOC(=O)C[C@@H](C)c1nc(Cn2nccn2)no1	0.957341
O=C(C1CN(c2ncc(C(F)(F)F)cc2F)CCO1)N1CCc2sccc2C1	0.543237
Cn1ncnc1C1(O)CN(C(=O)c2ccc(C(F)(F)F)[nH]c2=O)C1	0.719415
Cc1ccc(C(=O)O)c(N(C)CCCn2cccn2)n1	0.988122
Cc1nc(C2CN=C(N3CCc4c(nnn4-c4ccccc4)C3)N2)cs1	0.948316
COc1cc(C2SCCS2)ccc1OC(=O)CCc1ncc(-c2ccccc2F)o1	0.782514
Cc1ccc(C)c(NC(=O)c2nnn(CC(=O)Nc3ccc(C)c(Cl)c3)c2N)c1	0.912628
CC(NC(=O)C(C)(C)CN)C(C)(C)c1ccccc1	0.805884
CC(c1cccc(Cl)c1)N1CCNCC1	0.618771
O=C(O)CSCc1cccnc1	0.676639
Cc1nccc(N[C@@H]2COCC[C@@H]2NC(=O)Cc2nsc3ccccc23)n1	0.570995
COc1ccc(-c2nn(-c3ccccc3)cc2C=C2C(=O)NC(=O)NC2=O)cc1	0.999344
CC(=O)Nc1cc(S(=O)(=O)N2CCC(N)CC2)ccc1C	0.546317
Cc1nnc(-c2ccc(C(=O)NCC(C)c3cccs3)cc2)[nH]1	0.959638
CCOc1ccc(C=C2N=C(c3cccc4ccccc34)OC2=O)cc1OCC	0.997493
COc1ccc(Cl)cc1NC(=O)CN1CCC(n2cnc3cccnc32)CC1	0.974177
Cn1cc(-c2cc3n(n2)CCC(=O)N3CCCC(=O)Nc2ccc(Cl)cc2)c2ccccc21	0.93558
CCSCc1ccnc(NC(=O)c2cc(NC(=O)N(C)C)ccc2Cl)c1	0.575553
Cc1cc(NCC2CCOc3ccccc32)n2ncnc2n1	0.907281
c1ccc(CN2CC3CCNC3C2)cc1	0.984504
COc1ccc(OC)c(CN2CCc3c(cnc(C)c3CNC(=O)c3ccccc3SC)C2)c1	0.998028
Cc1cc(C)cc(OCCCOc2ccc(C=NNC(=O)c3cccc(Cl)c3)cc2)c1	0.979194
c1ccc(CN2CN=C(/N=c3/[nH]c4ccccc4s3)NC2)cc1	0.987783
CC(=O)Nc1cccc2c1CCCN2C(=O)c1cccc(OCc2c(C)noc2C)c1	0.849595
CCC(=O)N1N=C(c2c(O)[nH]c(=O)n(C)c2=O)CC1c1ccc(N(CC)CC)cc1	0.994205
CC(=O)c1cc2c(cc1NC(=O)c1cnn3cc(C)cnc13)OCCO2	0.661826
O=C(NN=Cc1ccc(Br)cc1)c1cccc(Cl)c1	0.996291
COCCCCN1CCN(C(=O)c2ccc(NC(=O)c3ccco3)c(C)c2)CC1	0.991426
Cc1ccc(-c2ccc(/C=C3/SC(N4CCN(c5ccccc5[N+](=O)[O-])CC4)=NC3=O)o2)cc1	0.931523
COc1ccc2c(c1)sc(=NC(=O)c1ccc(S(=O)(=O)N3CCCC3)cc1)n2C	0.967361
N#Cc1cccc(C(=O)OCc2cc(=O)n3ccccc3n2)c1	0.859585
COc1ccc(C2=NN(C(=O)CCC(=O)O)C(c3cc4ccc(C)cc4nc3Cl)C2)cc1	0.98784
Cn1nc(CNC(=O)C2CCC2)c2ccccc21	0.989294
Cc1ccn2c(=O)cc(COc3cccc(NC(=O)COc4ccc(C)c(C)c4)c3)nc2c1	0.62231
CN(C)c1ccc(NC(=O)C2CCCC2)cc1CN(Cc1ccc(F)cc1)C(=O)c1ccccc1Cl	0.537098
CC(=O)c1cccc(S(=O)(=O)Nc2nc3ccccc3s2)c1	0.836431
COc1cc(OC)c(/C=N\NC(=O)CN2CCN(S(=O)(=O)c3ccc(C)cc3)CC2)c(OC)c1	0.985172
CSc1nc2c(c(N3CCN(C4CCN(C(C)C)C4=O)CC3)n1)CCC2	0.896122
COc1cnc2nc(NC(=O)CCCNC(N)=O)sc2c1	0.983869
CCOc1ccccc1C(=O)NC1CCCN(c2cc(-c3ccc(OC)cc3)n[nH]2)C1	0.87361
COc1ccc(N(Cc2cc3cc(OC)ccc3nc2O)C(=O)C2CCCO2)cc1	0.98883
CN(Cc1nc2ccccc2o1)Cc1ccccc1N1CCCCC1	0.991381
COc1cc(C=C2NC(=O)NC2=O)ccc1OCCO	0.988573
C=CCOc1ccc(C(=O)N2CCC(c3n[nH]c4nccnc34)CC2)cc1	0.942648
CCCc1nc(N2CCC(N3CCCC(C(=O)N4CCCC4)C3)CC2)no1	0.967716
CC(CCC(=O)O)NC(=O)c1ccn(-c2ccc([N+](=O)[O-])cc2)n1	0.790799
CCCCN(Cc1ccncc1)C(=O)c1ccc(-c2sc(C)nc2C)cc1	0.572619
COc1cccc(Nc2nc(-c3ccc4c(c3)CC(=O)N4)cs2)c1	0.932134
O=c1c2ccc(F)cc2ncn1CC1(O)CCCOC1	0.714802
COc1cc(/C=N/NC(N)=O)ccc1OCc1c(Cl)cccc1Cl	0.985292
CCN1CC(NC(=O)c2ccn(C(C)C)n2)CC1=O	0.615186
CN(C)C1(C(=O)O)COc2ccccc2C1	0.963925
O=[N+]([O-])c1ccc(Oc2cccc(C=Nc3ccc4oc(-c5ccc(Cl)cc5)nc4c3)c2)c([N+](=O)[O-])c1	0.999453
COc1ccc(CC(=O)N2CCC(c3cc4nc(C)cc(O)n4n3)C2)cc1OC	0.96857
CC1CNCCN1C(=O)C=Cc1ccc2c(c1)CCO2	0.999324
CC(C)CCNC(=O)c1c(N)n(CCC(C)C)c2nc3ccccc3nc12	0.973102
O=C(/C=C/c1ccco1)Oc1ccc(/C=N/NC(=O)C(O)c2ccccc2)cc1	0.991984
CN1C(=O)CC(N2CCN(C3CC(=O)N(C)C3=O)CC2)C1=O	0.873335
C=CCCC(CN1C[C@H]2CC=CC[C@H]2C1)Oc1ccc(CN(C)C)cn1	0.99399
NCCC1CCCCN1C(=O)CCCc1cc(F)ccc1F	0.942142
COc1cc(C(C)=NNc2ccccc2Cl)cc(OC)c1OC	0.996604
Cc1cs/c(=N\C(=O)Cc2csc(-c3cccs3)n2)[nH]1	0.805291
Cc1ccc(-n2cc(C(=O)N3CCC(NC(=O)Cc4cccs4)CC3)nn2)cc1	0.618506
CCCCCN(Cc1ccc(F)cc1)C(=O)c1cccc[n+]1[O-]	0.886705
O=C(c1ccc(O)nc1)N1CCN(C(=O)C(c2ccccc2)c2ccccc2)CC1	0.840217
CCN1CCN(CC(C)CNc2ccc3cc(C#N)ccc3n2)CC1	0.99249
COCCC1(c2noc(C)n2)CCN(C(=O)COCc2ccccc2)CC1	0.645872
COCCn1cncc1CNC(=O)c1cc(C)nc2onc(C)c12	0.92215
CCc1nc(C)c(CN2CCCC23CCCN(c2ccc(C)cc2)C3=O)[nH]1	0.966604
NCC1CCN(C(=O)c2ccc([N+](=O)[O-])cc2Br)C1	0.991487
CC(=O)c1c(C)nn(CC(O)Cn2c3c(c4cc(C)ccc42)CCCC3=O)c1C	0.98518
CC1OC2(CCN(C)CC2)CC1NCC1CCC2CC1CO2	0.995898
CN[C@H]1CC2(CCN(C(=O)Cc3c(C)noc3C)CC2)OC[C@]1(C)O	0.572576
CC[NH+](CC)CCCNCCC(c1ccccc1)C1CCOC(C)(C)C1	0.988783
COCCCN(Cc1cccn1C)CC(O)COc1ccc(Cl)cc1	0.896496
CC(=O)N1c2ccc(C)cc2C2CN(C)CCC21	0.96843
COc1ccc(N2C(=O)C(Cl)=C(Nc3cc(Cl)ccc3O)C2=O)cc1	0.952734
COC(=O)N1CCC(CNc2nc3cccc(C)c3o2)CC1	0.814269
Cc1nc(-c2ccc(C(=O)N3CCC(CNC(=O)c4cnn(C)c4)CC3)cc2)cs1	0.99118
c1ccc(OCCN2CCC3(CCCOC3)C2)cc1	0.952159
N#Cc1cnc2c(Cl)cccc2c1NCC1CN2CCC1CC2	0.785364
C[n+]1ccccc1/C=C/c1ccc(C#N)cc1	0.975603
Cc1noc(CN(C)C(=O)NCC(c2cccnc2)N2CCOCC2)n1	0.985475
O=C(c1n[nH]c2c1CCC2)N1CC[C@H](N2CCN(C(=O)c3cc(-c4cccc5ccccc45)nc4ccccc34)CC2)C1	0.992383
COc1ccc(/C=N/NC(=O)c2cc(-c3ccc(OCc4ccc(C)cc4)cc3)n[nH]2)cc1	0.93389
CC(=O)N1CCC2(CC1)CN(Cc1nc(-c3ccccc3)no1)CCO2	0.821665
Cc1ccc(C)c(NC(=O)c2cccc(-n3cncn3)c2)c1	0.554576
Cc1cccnc1NCCNC(=O)CCc1scnc1C	0.987663
Cc1ccc(C(=O)N2CCC(C)CC2)cc1NC(=O)c1ccco1	0.715678
N[C@@H]1CN(CC(=O)NC(=O)NC2CC2)C[C@H]1c1ccccc1	0.938565
COc1ccc(C=NNC(=O)c2ccc3c(c2)OCO3)cc1OC	0.998
COc1cc(C(=O)NC2CCNCC2)ccc1Nc1nc(Oc2cccc3c2C(=O)CC3)c2cc[nH]c2n1	0.798633
C[C@@H]1[C@@H](NC(=O)c2cn(-c3ccc4c(c3)C(=O)N(C3CCC(=O)NC3=O)C4)nn2)C2CCN1CC2	0.924209
COc1ccc(-c2nsc(NC(=O)c3oc4cc(Br)ccc4c3C)n2)cc1	0.947756
N#CCCN(CC1CCC1)C(=O)C=Cc1cccnc1	0.844662
C/C(=N\Oc1cccc(F)n1)c1ccccc1	0.683612
CNc1ncccc1CO	0.887911
ClC12CC3CC(C1)CC(n1cncn1)(C3)C2	0.929034
Cc1ccc(-c2nnc(S)n2CCC(=O)Nc2ccn(C)n2)cc1	0.827381
O=C(Cc1ccccc1[N+](=O)[O-])Oc1ccc(OCc2ccncc2)cc1	0.991551
COc1cncc(C(=O)NCC2(Nc3ncnc4nc[nH]c34)CCC2)n1	0.969042
c1ccc([C@H]2C[C@@H](c3ccc4c(c3)OCO4)Nc3nnnn32)cc1	0.985664
O=C(NCCNc1ccc(-n2cccn2)nn1)c1ccco1	0.976892
COc1ccc(NC(=O)c2nc(N(C)C)c3c(C)cc(C)nc3n2)cc1	0.99918
O=C(Nc1ccc2oc(-c3cc(I)ccc3Cl)nc2c1)c1ccccc1[N+](=O)[O-]	0.956598
CCN(C=Cc1nnnn1-c1ccc(Cl)cc1)CC	0.940737
CS(=O)(=O)c1ccc(CNc2ccc3c(n2)CCC3)s1	0.994128
CCn1cc(C(=O)O)c(=O)c2cnc(N3CCN(C(=S)Nc4ccc(C(=O)OC)cc4)CC3)nc21	0.996671
CCN(CCN1CCCC1)Cc1cc2ccccc2nc1O	0.996215
COc1ccccc1NC(=O)N1CCCN(c2nc3cccnc3s2)CC1	0.982475
Nc1cc(N2CCCC(c3cc[nH]n3)C2)ncn1	0.613256
NC1CCC1CC(=O)N1CC2(CC2)c2ccc(Br)cc21	0.621608
CCCOc1ccc(NC(=O)c2cn(C3CCNCC3)nn2)cc1	0.982881
CCOc1cc(C=C2C(=O)N(C)C(=S)N(C)C2=O)cc(I)c1OCc1ccc(Cl)cc1Cl	0.983298
C=CC(=O)N1C[C@@H]2CC[C@]2(N)C1	0.703914
CC1(C)Oc2ccc(Cl)cc2[C@@H]2O[C@@H]3CCN(CC(=O)N4CC(=O)Nc5ccccc54)C[C@H]3C[C@H]21	0.95091
COc1ccc(CCNC(=O)c2cc3ccoc3cn2)cc1OC	0.91239
CC(C)CSc1ncc(CNCCc2nc3ccccc3n2C)cn1	0.998488
COc1ccc(NC2=Nc3ccccc3N3C2=Nc2c(c(C)nn2-c2ccc(C)cc2)C3c2cccc(OC)c2)cc1	0.987475
O=C(O)COc1cccc(NC2CCCOCC2)c1	0.672953
Cc1nc(NCCN(C)C(=O)c2ccc3[nH]c(=O)[nH]c3c2)ccc1C#N	0.830621
CC(C)c1cc(C(=O)Nc2ccccc2CN2CCOCC2)no1	0.550523
CC1CCN(C(=O)c2nc(Br)cs2)CCS1	0.612304
Cc1cc(N2CCOC(c3cnn(C)c3)C2)c2ccc(F)cc2n1	0.528031
O=C(NCCN1CCCC1)c1ccnc(-n2cnnc2)c1	0.957652
CCOC(=O)CN1C(=O)S/C(=C/c2cc(C)n(-c3ccc(OCc4ccc(F)cc4)cc3)c2C)C1=O	0.968202
Cc1nc(C)c(CC(=O)NCc2ccccc2COCc2ccccc2)c(=O)[nH]1	0.879218
CN(C)C(=O)CSc1nnc([C@@H](N)Cc2ccccc2)o1	0.750972
Cc1cc(C)c(S(=O)(=O)N2CCC(C(=O)NCc3ccccc3Cl)CC2)c(C)c1	0.525653
CN1CCCC(C(=O)NCC2Cc3cc(F)cc(-c4ccccn4)c3O2)C1	0.995446
COc1cc2c(cc1OC)CN(c1nc(C)cc(N)n1)CC2	0.996625
NCC1CCCCN1C(=O)c1ccc(C(F)(F)F)cn1	0.939918
Cc1c(Cl)cccc1N1C(=O)C2ON(c3ccccc3)C(c3ccncc3)C2C1=O	0.870843
CN(C)Cc1nnc(NCCC2CCCCC2)o1	0.763118
Clc1ccc(CN2CCN(/N=C/c3ccccc3)CC2)cc1	0.879373
Cc1cccn2c(=O)c3cc(C(=O)N4CCOCC4)n(C)c3nc12	0.996593
O=C(Cn1cnnn1)N1CCc2oc(CCc3ccccc3)nc2C1	0.852255
NC(=O)C1CCN(c2nc(N3CCCC3)nc(N3CCCC3)n2)CC1	0.613874
COc1ccc(N2CCN(C(=O)CCC(C)C3CCC4C5C(O)CC6CC(O)CCC6(C)C5CC(O)C34C)CC2)cc1	0.863956
COc1ccc2nc(SCC(=O)N3CCC3)[nH]c2c1	0.936711
C=C(C)CN1CCc2ncnc(OCC)c2C1	0.985219
c1cc(CN2CCCC3(CCOCC3)C2)c2[nH]ccc2c1	0.995231
O=C(Nc1ccc2c(c1)OC1(CCCCC1)O2)c1ccc(-n2ccnc2)nn1	0.901088
Cc1ccc(C)c(Cc2cc(Cl)ccc2Cl)c1	0.987106
CN(C)CCSC(c1ccccc1)c1ccccc1	0.98143
CCc1nc2n(n1)CC(NC(=O)c1ccc3c(=O)n(CC)c(=O)[nH]c3c1)CC2	0.665313
CN(C)CCN(CC1CCCO1)C(=O)c1ccc2c(c1)CCCO2	0.995954
Cc1cc(NS(=O)(=O)c2cc(C(=O)Nc3ccccc3)ccc2Br)no1	0.920044
CC(=O)NCc1ccc(C(=O)Nc2c(C)cccc2C)cc1	0.676132
CCOc1ccccc1C(=O)N1CC(F)(F)C[C@H]1Cn1cc(C(=O)NC)nn1	0.712276
CC(=O)N1CCCN(C(=O)Cc2c(C)nc(C)[nH]c2=O)CC1	0.978758
Cc1ccc(SCCC(=O)OCC(=O)Nc2ncc(Cl)cc2Cl)cc1	0.9858
c1ccc(COc2cccc(CN3CCOCC(Cc4cncc5ccccc45)C3)c2)nc1	0.831419
Cc1cc(C)cc(-n2ncc(CNCC(C)(N)Cn3cccn3)n2)c1	0.987648
Cc1nc2c(NC(=O)c3cc(-c4ccc(Cl)c(Cl)c4)ns3)cccc2c(=O)n1C1CCC(=O)NC1=O	0.68615
O=C1OC(c2cccs2)=N/C1=C\c1cc(Br)c(OCc2ccc(F)cc2)c(Br)c1	0.948762
c1cc2c(cc1C1CNCCN1)OCO2	0.991099
CN(C)C1(C)CCN(C(=O)Cn2nnc3ccccc32)C1	0.813549
NC1CCN(C(=O)c2ccc(-c3ccc(CN4CCCCC4)cc3)nn2)CC1	0.998046
CCOC(=O)C1CCN(Cc2ccsc2)CC1	0.936354
Cc1cc(C(=O)NC2CCN(c3cc4c(nn3)CCCC4)CC2)no1	0.974889
CCN(Cc1ccncc1)C(=O)c1cc2n(n1)CC(c1ccccc1Cl)OC2	0.630898
C1CNCC(CNC2C3CC4CC(C3)CC2C4)C1	0.997111
Cc1ocnc1C(=O)NC1CCCN(c2ncccn2)C1	0.961765
COCCN1C(=O)/C(=C\c2c(N3CCN(c4ccc(F)cc4)CC3)nc3c(C)cccn3c2=O)SC1=S	0.998159
COc1ccc2[nH]c(-c3nc(CCN(C)C(=O)c4ccc(C)c(F)c4)no3)cc2c1	0.997006
CCOC(=O)CN(C)Cc1nc2cc(Br)cnc2[nH]1	0.994179
O=C(Cn1cccn1)N[C@H]1CN(C(=O)C2CCN(c3ccncc3)C2)C[C@H]1F	0.513224
O=C(O)C1CCN(CCc2ccc([N+](=O)[O-])cc2)CC1	0.986448
c1ccc2c(NCC(C3CC3)C3CC3)nc(-c3ccncc3)nc2c1	0.971054
CCOc1ccc(NC(=O)Nc2ccc3sc(NC(=O)C4CCCCC4)nc3c2)cc1	0.882292
O=C(c1ccc2cccnc2c1O)N1CC2CCCC21	0.845431
COc1cccc(C(=O)N2CCC(c3ccn4ncc(C(=O)N5CCCCC5)c4c3)CC2)c1OC	0.811282
Cc1cnc(CNC2CCN(c3ccc(F)c(Cl)c3)C2)s1	0.962289
CCc1ccc(C(=C(Br)c2ccccc2)c2ccccc2)cc1	0.99615
Nc1cc(-c2cn(C3CCOC4(CCN(C(=O)c5cccc6c5COCC6)CC4)C3)nn2)ccn1	0.589591
O=c1oc2c(O)c(O)ccc2c2c(O)c(O)c(O)cc12	0.917328
CCOC(=O)c1cnn(-c2ccc3c(c2)OCCO3)c1CNC1CC1	0.653516
Cc1cc(N2CCC(Nc3ccnc(N4CCOCC4)n3)C2)nc(C2CC2)n1	0.776105
CCc1oc2cc(O)ccc2c(=O)c1-c1ccccc1OC	0.614806
O=C(NC(c1nccs1)C1CCCN(Cc2ccc(F)cc2)C1)C1CC1	0.613583
CC(C)NC(=O)N1CCC2(CC1)OC(C(=O)N1CCCCC1)Cn1ccnc12	0.939361
CCn1ncc(C(=O)N2C[C@@H](O)[C@@H](NC(=O)CCc3c[nH]cn3)C2)n1	0.961189
COCCOCC(=O)NCCN1CCNCC1	0.968345
C=Cn1cc(CN2CCC(Nc3nc(C)cs3)CC2)cn1	0.986635
Cc1cc(C)nc(NC2CCN(Cc3ccccc3)CC2(C)C)n1	0.834084
CN(Cc1csc(-c2ccccn2)n1)C1CCCNCC1	0.998052
Cc1cc(CCC2CN(C(=O)c3cc(C(C)C)no3)CCO2)ncn1	0.917772
CN1CCN(S(=O)(=O)c2ccc(NCCNc3ccc4ccccc4n3)c([N+](=O)[O-])c2)CC1	0.972765
O=C(CCc1nc2cc(Cl)ccc2s1)N1CCC[C@H]1c1ncn[nH]1	0.99522
CC(=O)Nc1ccc(NS(=O)(=O)c2ccc(C)c(C)c2)cc1	0.590085
Cc1cc2nc(CNC(=O)c3cc(CN4CCOCC4)on3)[nH]c2cc1C	0.641452
Cc1ccc(C2=NN3C(=N)/C(=C/c4cccc(OCc5ccccc5)c4)C(=O)N=C3S2)cc1	0.985672
O=C(c1ccnnc1)N1CCO[C@H]2[C@@H](OCc3cccnc3)CC[C@@H]21	0.997427
CC(=O)Nc1ccc(C(=O)NC(c2ccccn2)C2CCC2)cc1	0.99088
Cc1ccc(-n2nnnc2C/C=N/Nc2ccc([N+](=O)[O-])cc2)cc1	0.997775
CCOC(=O)NNC(=O)c1cc2cc(OC)ccc2[nH]1	0.658002
Cc1ccc(C)c(-n2cc(CN3CCC(N(C)C)C3)c(-c3ccccc3)n2)c1	0.993685
Cc1nc(CN2CCC(Nc3ccnc(C4CC4)n3)C2)no1	0.996892
Cc1cccc(NC(=O)N2CCC3(CC(=O)N(c4cccc(F)c4)C3)C2)c1	0.526933
COCC(=O)N1CCOC(c2cc(C(=O)N(C)CCO)c3ccccc3n2)C1	0.979149
O=C(Nc1ccccc1)N1CCCOC2(C1)CN(C(=O)c1nccs1)CCO2	0.732455
CCCNC(=O)C1CN1Cc1ccc(OC)cc1	0.664904
Cc1oc(-c2ccccc2F)nc1C(=O)N1CCNC(C(C)C)C1	0.957486
OC(COc1ccc(OCc2cccnc2)cc1)c1cccc(F)c1	0.995186
CCn1ccnc1CN1CC[C@@]23O[C@@H](c4ccccc4)CN2C(=O)C[C@@H]13	0.863203
O=C(Cc1noc(C2CCCc3[nH]nnc32)n1)N(CC(F)(F)F)C1CC1	0.635196
COc1ccc(-c2cc(=O)c3cc(C)cc(C)c3o2)cc1O	0.979641
COc1cccc(-c2[nH]c(-c3ccc(N(C)C)cc3)nc2-c2oc(C)cc(=O)c2O)c1	0.988417
O=C(Nc1cc2ccccn2n1)N1CCN(Cc2nnn[nH]2)CC1	0.983017
Cc1ccc(NC(=O)c2ccc3c(c2)OCO3)cc1	0.994372
CCN(CC)CCCNS(=O)(=O)c1cc(C)c(C)cc1Br	0.904576
O=C1c2ccccc2NC(c2ccc3c(c2)OCCO3)N1c1ccccc1	0.980565
CCOc1cc(NCC(C)CNC(=O)c2cccc3[nH]ncc23)ncn1	0.93899
COc1ccc(-c2nnc(N3CCC4(CCN(C)C4)C3)o2)cc1	0.946719
Cc1ccc2c(=O)c3c([nH]c2c1C)CCN(CC(=O)NCc1cccc(Cl)c1)C3	0.995979
c1ccc(-c2cc(-c3nnc4n3-c3ccccc3SC4)c3ccccc3n2)nc1	0.936574
CC(C)c1nc(NC(=O)C2CC(=O)N(c3[nH]nc4ccccc34)C2)n[nH]1	0.927177
Cc1nc(-c2cccc(NC(=O)C(C)N)c2)oc1C	0.917354
Cc1cccc(C2Cn3cnc(C(=O)N4CCCC(C(=O)Nc5ccc(Cl)c(Cl)c5)C4)c3CO2)c1	0.892046
CN(Cc1ccc2ccccc2c1)Cc1nc2c(cnn2C)c(=O)[nH]1	0.93096
O=C(Oc1ccc(/C=N/Nc2nc(N3CCOCC3)nc(N3CCOCC3)n2)cc1)c1cccc(I)c1	0.959258
Clc1cccnc1N1CCC1	0.856784
O=C(C=Cc1cc(Br)cs1)c1cccnc1	0.995994
COc1cc(OC)cc(C(=O)N(C)CCNc2ncnc3nc[nH]c23)c1	0.922132
CN(C(=O)c1ccc(-c2ccc3c(c2)OCCO3)s1)C1CCNCC1	0.984914
COc1ccc(OC)c(C(C)Nc2ccc(C(=O)N(C)C)cn2)c1	0.938357
COc1ccc(C(C)(C)CNC(=O)CCC2CCNCC2)cc1OC	0.943925
O=C(Nc1ncc(Cc2ccc(Cl)cc2)s1)c1ccccc1Cl	0.843083
Cc1ccc(C(=O)Nc2ccccc2-c2ccccc2)c(Cl)c1	0.819326
COc1cc(NC(=O)C(C)N(C)CCOc2ccccc2Cl)cc(OC)c1	0.947676
CN1CCC2(CCCN(C(=O)Cc3ccccc3)C2)CC1	0.942294
Cc1ccc(CNCc2cccnc2-n2ccnc2)o1	0.997226
O=C1NC(=S)N(c2cccc(F)c2)C(=O)/C1=C/c1ccsc1	0.763117
COc1ccc(C(=O)N2CCNC(c3cccc(F)c3)C2)cc1OCCO	0.840882
CC=CC=CC(=O)N1CCN(CC2CCCO2)CC1	0.983476
Cc1ccc(-c2ccc(N3CCCN(C(=O)CN(Cc4ccco4)C(=O)C(C)C)CC3)nn2)cc1	0.911878
C=CCOc1ccc(C([O-])=C2C(=O)C(=O)N(c3cccc[nH+]3)C2c2ccc(OC)c(OC)c2)cc1	0.997721
CC(C)CCNc1nc(C(=O)/N=c2\[nH]nc(C(C)C)s2)cs1	0.700103
CCCCc1cc(C(=O)N2CCCC(O)(CN(C)C)CC2)[nH]n1	0.947541
O=C(Nc1cccc(-c2cc3cc(F)ccc3[nH]2)c1)C1CCC1	0.856163
CC(C)c1ccc(NC2=CC(=O)CCC2)cc1	0.692677
Cc1cc(C)nc(CCNC(=O)C2CC(=O)N(Cc3cccnc3)C2)n1	0.570194
O=C(COc1ccc(CNCC2(O)CCN(c3ccccn3)C2)cc1)N1CCOCC1	0.994851
CCC[C@]1(CO)CCN(c2ncccc2C(=O)O)C[C@H]1O	0.806208
CCc1ccc2nc(N3C(=O)C(O)=C(C(=O)c4ccc(OC)cc4)C3c3cccc([N+](=O)[O-])c3)sc2c1	0.99736
CC(NC(=O)Nc1cccn2cnnc12)c1nncn1C(C)C	0.749746
CC1CC1c1ccc(CN2CCCC(CCC(=O)O)C2)o1	0.888222
O=C(N1CCN(c2ccncc2)CC1)C(F)(F)c1ccccc1	0.883111
O=C(c1cc[nH]n1)N1CC(c2nncn2CC2CC2)C2(CCC2)C1	0.510538
CC1(NC(=O)Cn2ncc3cccnc32)CC=CC1	0.718512
Cc1cc(C)cc(NC(=O)COC(=O)c2ccc(Oc3ccccc3)cc2)c1	0.966394
C#CCCCCNC(C)c1ccccc1F	0.826951
Cn1cnc2cccc(-c3nc(C(C)(C)C)no3)c21	0.954056
Fc1ccc2c(NCc3nnc(C(F)F)s3)cccc2c1	0.768493
O=C(c1cc(-c2ccc(F)cc2)n[nH]1)N1CCCC(Cc2nc(C3CC3)no2)C1	0.836769
NC(CNC(=O)c1cnn(-c2ccc(Br)cc2)c1)C1CC1	0.721163
Cc1cc(O)nc(C2CCCN(C(=O)c3cncnc3)C2)n1	0.964033
Cc1ccc(CCNc2nnc(C)cc2C(F)(F)F)nc1	0.763748
Cc1cc(C(=O)Nc2nnc(-c3ccoc3)[nH]2)c2c(C)nn(C)c2n1	0.996859
O=C(NC(O)C(=O)c1cccs1)c1cccnc1	0.847197
O=C1CCC2(CCCN(Cc3cccc(Cl)c3Cl)C2)CN1C1CC1	0.976128
Cc1cccc2sc(NC(=O)c3ccc(NS(=O)(=O)c4ccccc4)cc3)nc12	0.984788
Cn1c(=O)c2c(nc(NN=Cc3ccccc3)n2Cc2cccc(Br)c2)n(C)c1=O	0.981819
Cc1ccccc1C(=O)N(CCO)Cc1cc2ccc(C)c(C)c2[nH]c1=O	0.580456
COc1cc(Nc2nc(C(F)(F)F)nc3ccccc23)cc(OC)c1	0.757352
Cc1cc(C(=O)NCC2=CCNCC2)c(F)cc1F	0.998428
CC(=O)Nc1ccc(S(=O)(=O)N(C)CC(=O)NCCN2CCNCC2)cc1	0.597475
Cc1ccccc1NC(=O)c1ccc(F)c(S(=O)(=O)N2CCN(c3ccccc3)CC2)c1	0.55775
CCOC(=O)c1cc2c(NCc3nc4c(cnn4C)c(=O)[nH]3)nc(C)cn2n1	0.990423
Cc1ccc(C2N3CC4(C)CN2CC(C)(C3)C4=O)cc1	0.708397
CCc1cnc(CN(C)C(=O)CCC2CCNCC2)s1	0.807433
CC(C)c1ccc(OCc2ccc(NC(=O)c3cc4[nH]c(=O)[nH]c(=O)n4c3)cc2)cc1	0.599449
CCC(NC(=O)C1=Cc2cccc(OC)c2OC1)C(=O)O	0.802332
CNC(=O)COc1ccc(OCc2ccnc(N(C)C)c2)cc1	0.948449
CN1CCN(Cc2nc3ccccc3c(=O)n2CC#N)CC1	0.99025
CN(CCN(C)c1ncccn1)C(=O)OC(C)(C)C	0.869118
O=C(Nc1ccccc1)C1Oc2c(c(=O)oc3ccccc23)C1c1ccc2c(c1)OCO2	0.85695
CC1CN(Cc2cocn2)CCN1c1cccc(F)n1	0.951676
COc1ccc(NC(=O)c2cc(C)on2)cn1	0.962077
Cc1cccc(O[C@@H]2CCC[C@H](N3CCN(C)CC3)[C@H]2O)c1	0.940216
O=C(O)CCOCCOCCOCCOCCOCCOCCOCCOCCN1C(=O)C(Br)=C(Br)C1=O	0.50445
COc1cccc(C(C)N2CCN(CC#N)CC2)c1	0.854934
COc1ccc(C(=O)NN=C2C(=O)N(CN3CCOCC3)c3ccc(Br)cc32)cc1	0.965564
CNc1ccc(CNCCC(=O)N2CCCC2)cc1[N+](=O)[O-]	0.863507
COc1ccc(Cl)cc1NC(=O)CSc1nnc2c3ccccc3nc(-c3ccco3)n12	0.990694
Cc1oc2cc(-c3nc(C4CCOC4)nn3Cc3cccs3)[nH]c2c1C	0.975558
Cn1ncc2c(N3CCN(c4ccccc4)CC3)nc(NCc3ccccc3)nc21	0.913431
O=C(NN=Cc1ccc([N+](=O)[O-])c(O)c1)c1cccnc1	0.997973
COc1ccc(NC(=O)c2ccc(-n3cnnn3)cc2)cc1Cl	0.99018
CCCCC1C=CCN1C(=O)c1ccc(-c2cnn3cccnc23)cc1	0.994184
CSc1cccc(NC(=O)Nc2ccc(Cl)cc2)c1	0.983971
Cc1ccc(C(O)=C2C(=O)C(=O)N(CCc3ccccc3)C2c2ccc(C)cc2)cc1	0.948908
Cc1nc(C)c2c(n1)OC(CN(C)Cc1ncccc1C)C2	0.998474
CC(C)[C@H](N)C(=O)OC(C)(C)C	0.855216
CC(Nc1nc2ccccc2o1)c1nnc2n1CCC2	0.508354
COc1cc(OCC(O)CN2CCc3c(Cl)cc(F)cc3C2)cc(-c2nn[nH]n2)c1	0.976698
CCCn1cc(NC(=O)c2cn(C)c(=O)n2C)ccc1=O	0.60682
CN1CCN(C(=O)CN2CCCCC2=O)CC1CCO	0.888152
Fc1cc([C@@H]2OCC[C@H]2NC2CCOCC2)ccc1Cl	0.509218
Cc1nn(C)cc1CN1CCC(Nc2ccnc(C3CC3)n2)C1	0.997989
COc1cn(C)c(C(=O)Nc2nnc(Cc3ccccc3)s2)cc1=O	0.97437
CC1=NN(c2ccc(C(=O)OC(C)C)cc2)C(=O)C1=Cc1ccc([N+](=O)[O-])o1	0.997889
CCc1ccc(F)c(C(=O)Nc2ccc(-c3cn(C)nn3)cc2)c1F	0.890791
O=C(COc1cccc(Cl)c1)N/N=C/c1ccc2ccccc2c1	0.574132
O=C1SC(=Cc2ccccc2OCc2ccccc2Cl)C(=O)N1c1cccc(Cl)c1	0.997048
COc1cc(NC2CCN(C)C2=O)ccc1Br	0.779652
O=C(NC[C@@H]1C[C@H](F)CN1)c1ccc(-n2nccc2-c2ccc(F)cc2)cc1	0.645699
O=C(c1ccc2ncsc2c1)N1CCC(c2nc3ccccc3[nH]2)CC1	0.997596
CCOc1ccc(/C=N/n2c(-c3ccco3)n[nH]c2=S)cc1	0.96603
C[C@@H]1C[C@@H](O)CN(c2cc(NC3CC3)ncn2)C1	0.654101
O=[N+]([O-])c1ccccc1CN(Cc1nnsc1Cl)C1CC1	0.789382
O=C(Nc1nn(CC(F)(F)F)cc1Cl)c1n[nH]c2c1CCCN2	0.973288
Cc1nc([C@@H]2C[C@@H]3CCN(Cc4nccs4)C[C@H]3O2)no1	0.992578
CCN1CCN(CCCNCc2c(C)nn(-c3ccc(Cl)cc3)c2C)CC1	0.879234
CC(C)C[C@H](CN)CC(=O)OCC1CCCOC1	0.738076
CCOC(=O)c1ncn2c1COC(c1ccc(C)c(C)c1)C2	0.619529
CC(C)N(Cc1ccccn1)Cc1cn(-c2ccc3ncccc3c2)nn1	0.99696
CC(C)(C)C(Cn1ccnc1)NC(=O)NCCc1ccsc1	0.699406
NCC1(c2cccc(F)n2)CCC1	0.754485
C=CCc1cc(C(=O)NNc2ccccc2[N+](=O)[O-])cc(OC)c1OC	0.972645
COc1ccc(CN2CCC(N(C)c3nccc(C(F)(F)F)n3)C2)cc1OC	0.819417
N#C[C@@H]1CC(F)(F)CN1C(=O)CNC(=O)c1ccnc2ccc(OCCCCN)cc12	0.89331
CCOC(=O)/C(=N/Nc1cccc([N+](=O)[O-])c1)C(C)=O	0.616073
CO[C@@H]1C[C@H](O[C@H]2CC[C@@]3(C)[C@H](CC[C@@]45CC[C@H](C6=CC(=O)OC6)[C@@](C)(CC[C@@H]43)C5=O)C2)O[C@H](C)[C@@H]1O	0.500201
COc1ccc(O)c(/C=N/NC(=O)C(=O)Nc2nnc(-c3ccccc3)s2)c1	0.976311
Cn1cnc2ccc(-c3ccc([C@H]4C[C@H](N)C4)cc3)cc21	0.95898
CN1CCN(C(=O)c2onc3c2CCCC3)C(CO)C1	0.984669
Cc1c(C(=O)N2CCc3cc(F)c(F)cc3C2)cnc2c1c(=O)n(C)c(=O)n2C	0.666185
O=C1/C(=C\c2cccc(F)c2)SC(=S)N1CNc1ccccc1C(F)(F)F	0.759979
COCCN1C(=O)N(Cc2cccnc2)C(=O)C12CCN(Cc1ccncc1)CC2	0.642258
CCOC(=O)c1cnc(NCC2CCSCC2)s1	0.854208
O=C1NC(c2ccccc2)=N[C@@]12CC[C@@H]1CNC[C@@H]12	0.718751
Cc1nc2ccccc2c(=O)n1CC(=O)NC1CC(Cl)(Cl)C1	0.984507
Cc1cnc(C(=O)OCC(=O)c2cc(C)n(-c3ccc(C(C)C)cc3)c2C)cn1	0.926705
CCN1CCN(c2ccc(NC(=O)C3CCN(C(=O)c4ncn5c4COC(c4cccc(C)c4)C5)CC3)cc2)CC1	0.994504
C=CCOc1cccc(C2/C(=C(\[O-])c3ccc4c(c3)CC(C)O4)C(=O)C(=O)N2CCC[NH+]2CCOCC2)c1	0.797213
CCOC(=O)C1=C(C)N=c2s/c(=C\c3ccc(-c4cccc(Cl)c4Cl)o3)c(=O)n2C1c1cccs1	0.666464
Cc1ccc(NS(=O)(=O)c2ccc(Cl)c(C(=O)N3CCN(Cc4ccc(Br)cc4)C(=O)C3)c2)cc1Cl	0.72247
CCN/C(S)=N\N=C\c1ccc(OCc2c(F)cccc2Cl)c(OC)c1	0.998933
CN1CCC(CO[C@@H]2CN(C(=O)c3ccnn3C)[C@@H]3COC[C@@H]32)CC1	0.982783
CCCCN/C=C1\Sc2ccc(OCC)cc2C1=O	0.984783
O=C(Nc1ccc2oc(-c3cccc(Cl)c3)nc2c1)c1ccc(Cl)c([N+](=O)[O-])c1	0.9954
CC(=NN1CCN(c2ccccc2)CC1)c1ccc(-c2ccccc2)cc1	0.986299
CC(=O)N(Cc1cc2cccc(C)c2[nH]c1=O)c1ccc(C)cc1	0.992475
COc1cccc(F)c1NCc1cnn(C(C)(F)F)c1	0.936922
CC1(CN)CCN(CC(=O)Nc2cccc(C(F)(F)F)c2)C1	0.719935
COc1cccc(C([O-])=C2C(=O)C(=O)N(CCC[NH+]3CCOCC3)C2c2cccc([N+](=O)[O-])c2)c1	0.969106
COCCN(Cc1nccn1C)CC1CCN(Cc2ccccc2OC)CC1	0.997199
NC1CCN(c2ccnc(NCc3ccc4ccccc4c3F)n2)C1	0.774163
COc1cc2ncn(CCCC(=O)NCCCC(=O)O)c(=O)c2cc1OC	0.984898
Nc1nc(-c2csc(NS(=O)(=O)c3ccc([N+](=O)[O-])c(Cl)c3)n2)cs1	0.716272
COc1cccc([C@@H]2[C@@H](C(C)C)CN(C(C)=O)C[C@H](OC)[C@@H](O)[C@@H](O)COCCCCN2C(=O)CNCCc2ccccn2)c1	0.853777
CCOc1ccc(N2C(=O)CC(N3CCN(c4ccc(Cc5ccc(F)cc5)cc4)CC3)C2=O)cc1	0.776647
c1ccc(CC2CCCCN2Cc2cnn(-c3ccccc3)c2)cc1	0.986255
NCc1cccc(C(=O)Cc2ccccc2)c1	0.862846
O=C(c1ccccc1)c1cc(Cl)ccc1NN=C1C(=O)N(c2nc(-c3ccccc3)cs2)N=C1c1ccccc1	0.968369
COc1ccc(C(=O)Nc2cc(-c3ccccc3)sc2C(C)=O)cc1OC	0.896341
Cc1ccc(-n2cnnn2)cc1NC1COC(C)(C)C1	0.96236
COc1ccc(Cl)c2sc(N(CCN(C)C)C(=O)c3ccccc3)nc12	0.983382
Cc1ccoc1C(=O)NCc1cccnc1N(C)CCc1ccccn1	0.924385
O=C(NCC1CCCN(c2ncccn2)C1)c1ccnc2[nH]ncc12	0.754738
CC(C)N(Cc1nnc(-c2cccc([N+](=O)[O-])c2)o1)C(=O)c1cc(CN2CCCC(n3cc(Cn4c5ccccc5c5ccccc54)nn3)C2)on1	0.992845
Cc1cc(C)n(CCCNC(=O)c2cc(COc3cc(C)c(Cl)c(C)c3)on2)n1	0.85596
CCOC(=O)CCC12CCC(=O)N1c1ccccc1-c1nnnn12	0.807218
O=C(c1cc2sccc2n1Cc1ccc(F)cc1)N1CCc2ccccc21	0.583175
Cn1cnc2c(N3CCN(Cc4ccc(C#N)cc4)CC3)ncnc21	0.528437
CN(CC(O)C(C)(C)C)C(=O)C(=O)N1C2CCNCC1CC2	0.837034
CCOC(=O)C1CCN(Cc2cc(=O)oc3ccc(O)cc23)CC1	0.995394
Cc1ccc(-n2cnnc2SCC(=O)N2CCC(C(=O)Nc3ccccc3)CC2)cc1C	0.763813
C#CCNc1nc(Cl)nc2c1ncn2C	0.891261
COc1cc(/C(C)=N\NC(=O)c2ccncc2)cc(OC)c1OC	0.998388
Cc1nnc2n1CCN(CC(=O)Nc1ccncc1)C2	0.906087
COCCN1C(=O)CO[C@H]2CN(CC3(O)CCN(c4ccccc4F)CC3)C[C@@H]21	0.98764
NCCNC(=O)C1CCCN(C(=O)c2csc(-c3ccccc3)n2)C1	0.916603
COC(=O)c1ccc(C=C2SC(=Nc3ccc(OC)cc3)N(CC(C)C)C2=O)cc1	0.917318
O=S(=O)(NCC1CNCCO1)c1ccc(Cl)c(Cl)c1	0.765236
COC(=O)c1ccc(/C=C2/S/C(=N/c3ccc(F)cc3)NC2=O)cc1	0.943681
CC(=O)c1ccc(NC=C2CCc3ccccc3C2=O)cc1	0.989202
O[C@@H]1C[C@H]2CN(Cc3ccc4c(c3)OCO4)C[C@H]2C[C@H]1Oc1cccc(Cl)c1	0.991559
CC(C)CC(C)(CN)NC(=O)c1nn(-c2ccccc2F)c2c1CCC2	0.742513
CC1CCN(Cc2nnnn2CCCC(=O)NCCc2cscn2)CC1	0.994623
CCOC(=O)C1CCCN(C(=O)CCn2c(Cc3ccc(Cl)c(Cl)c3)nc3ccccc32)C1	0.963586
Cc1ccc(C)c(N(C(=O)c2cnc(N(C)C)cn2)C2CCOCC2)c1	0.995045
CCSc1nc2c(c(O)nc(=O)n2C)n1Cc1ccc(Cl)cc1	0.989452
Cc1cccn2cc(CC(=O)N3CCC(NC4CCC4)CC3)nc12	0.950099
Cc1cccn2c(Nc3ccc(C(C)C)cc3)c(-c3ccco3)nc12	0.999011
CCN1CCN(C2CCCC2)C(CCO)C1	0.854147
O=C1CCCCN1CC1CCN(c2ccnc3ccccc23)CC1	0.989815
CCOc1cccc(/C=N/n2c(S)nnc2-c2ccccc2C)c1O	0.979549
COc1cc(C(=O)Nc2ccc(Cn3cncn3)cc2)ccc1Oc1ccc(Cl)cc1[N+](=O)[O-]	0.99748
N#Cc1ccccc1NC(=O)CCN1CCC(n2cncn2)CC1	0.606054
CN1CCc2ccc(NCCc3ccc4c(c3)CCO4)cc2C1=O	0.806158
Cc1[nH]c2ccccc2c1/C=N/Nc1nc(Nc2ccccc2)nc(Nc2ccccc2)n1	0.749456
CCn1c(=N)c(S(=O)(=O)c2ccc(C)cc2)cc2c(=O)n3cc(C)ccc3nc21	0.998062
Cc1nc(/N=c2/[nH]c3ccccc3o2)nc(C)c1C(=O)N1CCN(c2ccccc2)CC1	0.885515
Cc1ccc(C)c(OCCc2nnc(NC(=O)c3cc4ncccn4n3)s2)c1	0.549735
Cc1cc2n(n1)CCN(C(=O)CCC(=O)Nc1nncs1)C2	0.745591
CCCCC(=O)Nc1nc2nc(CCC)cc(O)n2n1	0.716303
C=C(C)CN(CC)C(=O)CSc1nc(C)nc2c1c(=O)n(C)c(=O)n2CC(C)C	0.570748
O=C(N[C@@]1(c2ccccc2)CCNC[C@H]1O)c1ccc2ncccc2c1	0.99086
CCN1CCN(C(=O)c2ccccc2N2CCC(NC(=O)c3ccc(C(F)(F)F)cc3)CC2)CC1	0.991583
O=c1c(-c2nccn2C2CCOCC2)ccc2n1C[C@@H]1CNC[C@H]2C1	0.995406
NC(=O)CN1C(=O)C(O)(CC(=O)c2ccccn2)c2ccccc21	0.595073
Cc1cccc(NC(=O)c2c(N)c(C(=O)c3ccc(F)cc3)n3ccccc23)c1	0.815743
COc1ccc(NC(=S)N(CCc2c(C)[nH]c3ccc(OC)cc23)Cc2ccco2)cc1	0.965568
OC1CCN([C@H]2CCC[C@H]2NCc2noc(C3CCCCC3)n2)C1	0.824884
C#CCCC1(CCNC(=O)Cn2c(C3CC3)nc3ccccc32)N=N1	0.920428
O=c1cc(CN2CCCC2c2nc3c([nH]2)CCCC3)nc2sccn12	0.97364
O=C(CN1CCN(C(=O)c2ccccc2)CC1)N1CCCC1	0.897513
CC(=O)N1CCCC1C1CCCN1Cc1nnc(-c2occc2C)o1	0.853157
O=C(c1ccnc2ccccc12)N1CCCC(O)(CN2CCCC2)C1	0.987713
c1nc2c(c(N3CCN(Cc4ccoc4)CC3)n1)CCC2	0.972762
NC(=O)c1ccc(N2CCN(Cc3cnc(N)s3)CC2)nc1	0.845212
COC(=O)N1CCCCC1C(=O)N1CCN(Cc2nnc[nH]2)CC1	0.678257
COc1cc(C#N)ccc1OCC1CCCN(CCn2cc(Cl)cn2)C1	0.734036
O=C(CSc1ccc(F)cc1)NCc1cncc(-c2ccsc2)c1	0.5688
Cn1ccnc1CNC(=O)c1cccc(-c2ccccc2F)c1	0.86173
Cc1ccc(-c2nnn(CC(=O)N3CCCC(c4nnc5ccccn45)C3)n2)cc1	0.515269
Cc1ccc(N(CC(=O)Nc2ccccc2F)S(=O)(=O)c2ccccc2)cc1C	0.576717
COc1cc(OC)cc(C(=O)NN=Cc2ccc(OCc3ccccc3)c(OC)c2)c1	0.999331
O=C(N[C@@H]1CN(C2CCSCC2)C[C@H]1CO)c1cccnc1	0.832459
COc1ccc2nc(C3CC3)cc(C(=O)N3CCC(N)C3)c2c1	0.998191
CCNC(=O)c1cc(NS(=O)(=O)c2c(C)cc(C)cc2C)ccc1N1CCNCC1	0.552152
C=CCOc1ccc(C(=O)N2CCC(c3ncccn3)C2)cc1	0.801886
Cc1nc(CC(=O)N(C)C2CCCN(c3ccccn3)C2)cs1	0.963462
Nc1ccccc1SCC1CC1(Cl)Cl	0.769091
O=C1N=C(S)N(Cc2ccc(F)cc2)C(=O)/C1=C\NCc1ccc2c(c1)OCO2	0.905506
CC(N1CCN(C(=O)C2CCN(Cc3ccccc3)CC2)CC1)C(F)(F)F	0.986681
NC1(c2cn(-c3cc(F)cc(Br)c3)nn2)CCCOC1	0.675883
CCNC(=O)[C@@H]1C[C@H](NC(=O)c2cnc(C)nc2C)CN1C(=O)COCC	0.952315
CNCC(C)C(=O)Nc1ccc(C)cn1	0.992543
COC(=O)COc1ccc(C=NNC(=O)C(C)Sc2ccccc2)cc1	0.94638
Cn1cnn(CC(=O)Nc2ccc(Cc3nc4ccccc4s3)cc2)c1=O	0.995135
COc1cc(C(=O)N2CCc3[nH]c(-c4cn[nH]c4)nc3C2)c2ccccc2n1	0.993734
Cc1c(/N=C/c2c(C#N)c(=O)oc3ccccc23)c(=O)n(-c2ccccc2)n1C	0.505286
O=C(Nc1ccccc1)c1cnc(N2CCOCC2)nc1CCNCc1ccc(F)cc1	0.954558
CNCCC(=O)N(C)C(c1ccccc1)C(C)C	0.737952
CC(C)c1ccc(C2(O)CCC(NCCN3CCCOCC3)CC2)cc1	0.980483
CNC(=O)c1nc(C)c(C)c(N2CC[C@@H](NCc3cncc(Cl)c3)C2)n1	0.98602
CCC(=O)Nc1ccc(C(=O)N/N=C(/C)CC)cc1	0.967618
Cn1cc(N2CCN(Cc3ccccc3Cl)CC2)cn1	0.962136
O=C1NC(=O)C(CCC(=O)N2CCCN(C3Cc4ccccc4C3)CC2)N1	0.771974
CC(N)C(=O)N1CCN(C2CC2)C(=O)C1	0.776609
CCCCOc1cccc(C(=O)Nc2ccc(O)c(-c3nc4cnccc4o3)c2)c1	0.980168
CC(C)[C@H](N)C(=O)NCC(=O)N1CCN(C)c2ncccc21	0.970532
CSc1cccc(NC(=O)N2CCN(c3ccc(Nc4cccnc4)nn3)CC2)c1	0.996107
O=C(OCc1ccccc1)C1Oc2ccccc2C1=O	0.968345
COc1ccc(OC)c(-c2csc(NC(=O)c3ccccc3Cl)n2)c1	0.80543
CN(C)c1ccc(/C=C/C=N\n2cnnc2)cc1	0.93222
Cc1ccc(CN2CC3(CCN(CC(=O)N(C)C)C3)C2)s1	0.87941
CCn1nc(C)cc1C(=O)NCC1(N(C)C)CCCCC1	0.647596
Cc1cccc(CN2C(=O)C(=Cc3ccc(C(=O)NC(C)c4ccc5c(c4)OCCO5)cc3)Oc3ccccc32)c1	0.790424
NCc1ccc2cccnc2n1	0.992843
Cc1cccc(C=C2C(=O)c3ccccc3C2=O)c1	0.989567
Cc1cc(C(=O)N/N=C/c2c(C)n(C)c3ccccc23)n[nH]1	0.941761
O=C(CSc1nnc(CN2CCCCC2)n1Cc1ccccc1)Nc1cccc(Cl)c1Cl	0.869066
Nc1ncc(-c2ccc(Cl)cc2)c(-c2ccc(OCc3c(F)cccc3Cl)cc2O)n1	0.903212
CCOC(=O)C(C)CNC(=O)c1cc(-c2cccnc2)nc2nc(N3CCCC3)sc12	0.727079
OC1CCCN(c2nc3ccc(Cl)cc3s2)C1	0.911438
Cc1nnc(SCC(=O)N2CCc3ccccc32)s1	0.651008
Cc1cccc(C)c1OCC(NC(=O)C1CC12CCNCC2)C(C)(C)C	0.916825
COc1ccc2cc1OCC(C)(C)C(=O)N(C)CCCCN(C(=O)c1cscn1)C2	0.938579
c1ccc(CC[Si](Cc2ccccc2)(c2ccc(-c3ccc(-c4ccccc4)cc3)cc2)c2ccc(-c3ccc(-c4ccccc4)cc3)cc2)cc1	0.992948
CN1CCC(=O)Nc2cc(C(=O)NCCN3CCOC(C)(C)C3)ccc21	0.9371
COc1cc(C(=O)N2CCC3(CC2)CCN(c2ccsc2)C3=O)on1	0.990662
C#CCCC1(CCC(=O)NC[C@H]2CCCN(Cc3ccccc3)C2)N=N1	0.986312
CCc1cnn(C)c1CN(CCC1CC(OC)C1)Cc1cccc2c1OCCO2	0.967163
CCN(CC)c1ccc(NC(=O)c2ccc(F)cc2F)cc1	0.871975
Cc1nn(C)c2sc(C(=O)N3CCN(CC(C)C)CC3)cc12	0.97741
CCc1ccc(N=c2ssc3c2-c2cc(OC)ccc2NC3(C)C)cc1	0.998481
Cc1cc(C)cc(-n2cc(C(=O)N3CCN(c4ccc(F)cc4)CC3)nn2)c1	0.680614
Cc1cnc(CCNC(=O)c2nccc3ccccc23)n1CC1CC1	0.714798
CN(CCCOc1ccc(Cl)cc1)C(=O)C(N)c1ccccc1	0.863543
COc1ccc(Cc2nc(-c3ccc(NC(=O)Cn4cc([N+](=O)[O-])cn4)cc3)no2)cc1	0.97709
CC(C)(C)NC(=O)[C@H]1CCN(Cc2cccc3ccccc23)C1	0.985836
NCCc1c(Cc2ccccc2)[nH][nH]c1=O	0.742554
CC1(c2ncc(Cc3cccc(F)c3)o2)CCNCC1	0.999663
Cc1cc(C)cc(OCC(=O)Nc2ccc(N3CCN(C(=O)C(C)(C)C)CC3)cc2)c1	0.920167
Cc1cccnc1[C@]1(O)CC[C@H]2CN(Cc3ccccn3)C[C@H]21	0.978324
O=C(c1cccc2ccccc12)N1CCN(Cc2nnc(C3CC3)o2)CC1	0.992951
CCOc1ccccc1OCc1nn2c(C3CCN(C)CC3)nnc2s1	0.993418
CNc1ccc(C(=O)NOCC2CCOC2)nc1	0.962912
O=C1NC(=Cc2ccc3c(c2)OCO3)C(=O)N1Cc1ccc(Cl)cc1	0.956373
CC(C)Cc1noc(CN2CC(C)C(N)C2)n1	0.988339
CC(CC(=O)N1CCCCC1CNC(=O)CCN)C1CCCNC1	0.989982
Cc1ccc(Oc2ccc(NC(=O)NCc3ccc(NC(=O)c4ccco4)cc3)cc2Cl)c(Br)c1	0.87787
CC(=O)Nc1ccc(C(=O)N2C[C@H]3C[C@@H](n4cnc5ccccc54)[C@H](O)C[C@H]3C2)cc1	0.767098
O=C(Nc1cc(C(F)(F)F)ccc1-n1cccn1)c1ccc2nccnc2c1	0.89368
Cn1cc(/C=C2\SC(=S)N(C3CCCC3)C2=O)c2ccccc21	0.934806
N=c1c(S(=O)(=O)c2ccccc2)cc2c(=O)n3ccccc3nc2n1C1CCCC1	0.985342
Cc1cccc(NC2CCN(C(=O)c3ccc(O)c(Cl)c3)CC2)c1	0.91843
Cc1ccc(C(=O)N2CCN(C(=O)c3ccc(C(F)(F)F)cn3)CC2)cc1	0.747105
CCCCC(c1cccnc1)N(C)C(=O)c1cc2ncccn2n1	0.965933
O=C(c1ccccc1)N1CCCC1c1ccnc(Nc2cnccn2)n1	0.811058
CC(CNC(=O)c1csc(CN)n1)Oc1ccccc1	0.733656
CC1(C)CN(C(=O)c2cccc(-n3ccnc3)n2)Cc2ccccc2O1	0.878414
CCN1CCN(C(=O)CC2CCN(C(=O)CCC3CCNCC3)CC2)CC1	0.99734
CN1CCCC(CNC(=O)N2CCN(Cc3ccon3)CC2)C1	0.994602
CC(C)n1ccnc1C1CCN(Cc2nc3ccsc3c(=O)[nH]2)CC1	0.817976
COc1ccc(C=C2Oc3cc(OCC(=O)NC(CC(N)=O)C(=O)O)ccc3C2=O)c(OC)c1	0.957682
CCc1nc2ccc(C(=O)N3CCN(Cc4ccccc4)CC3)cc2nc1CC	0.999144
Cc1ccccc1C(=O)N/N=C1/C(=O)Nc2c(Br)cc(Br)cc21	0.864027
Cc1ccc(S(=O)(=O)N2CCN(Cc3nc4sc5c(c4c(=O)[nH]3)CCCC5)CC2)cc1C	0.760454
C=CC(=O)N(C)CC1COCCO1	0.62244
NCCOC1CCOC1	0.967014
CNCC1CCN(C(=O)C=Cc2ccccc2OCc2csc(C)n2)C1	0.999393
COc1ccccc1CNCc1cccc(C)c1	0.785662
CCOC(=O)C1=C(CCl)OC(N)=C(C#N)C1c1ccco1	0.55999
Cc1cc(C(=O)N2Cc3nc(C)n(C)c(=O)c3C2)c2ccc(C)c(C)c2n1	0.997095
CCOC(=O)c1n[nH]cc1CNCc1cccnc1N(C)C	0.995178
Cc1cccc(N2CCN(CCCNC(=O)c3cc4c(C)nn(C)c4nc3C)CC2)c1	0.998748
CC1CCCN(Cc2ccccc2CNC(=O)c2ccc(CN)cc2)C1	0.913391
CCc1ccc(OCc2nc3ccccc3n2Cc2ccc(Cl)cc2Cl)cc1	0.991611
Cc1ccccc1NCC(=O)N/N=C/C=C/c1ccc2c(c1)OCO2	0.985979
Cc1nc(CN2CC[C@H]3C[C@@H](c4nnc(C5CC5)o4)O[C@@H]3C2)cs1	0.95759
O[C@@H]1C[C@H](NCc2ccn(-c3ccccc3)n2)[C@H]1n1cccn1	0.991141
COc1ccc(CN(C)C[C@@H]2CCN(C)[C@H]2c2cccnc2)cn1	0.999136
CC(C)(CN1CCCC1)NC(=O)c1coc2c1C(O)CCC2	0.924464
COc1ccc(NC(=O)c2cc(C)[nH]n2)cc1OC	0.536821
COc1ccc2c(c1)SC(c1ccc3c(c1)OCO3)CCN2Cc1c[nH]nc1-c1ccccc1	0.985095
Cc1cc2c(c(=O)o1)C(c1ccc3c(c1)OCO3)C(C(=O)Nc1ccc(Cl)cc1)O2	0.877347
Cc1ncc2c(n1)CN(CC(=O)N(C)Cc1ccco1)CC2	0.98242
CCn1cc(C(=O)N2CCNC(c3ccc(Cl)cc3)C2)nn1	0.676264
FC(F)(F)c1ccc(N/N=C/c2c[nH]c3ccc(Br)cc23)nc1	0.532179
O=C(NC1CCN(Cc2ccccc2)CC1)c1ccc2c(c1)nc1n2CCCCC1	0.952655
O=C1/C(=C(\O)C(F)(F)F)CCc2occc21	0.731006
Cc1oc2c(c(C)cc3oc(=O)c(CC(=O)Nc4cccnc4)c(C)c32)c1C	0.88123
Cc1cc(C)cc(C(=O)N2CCC(CC(=O)O)CC2)c1	0.804954
O=C(Nc1cc(Cl)c(/N=C/c2ccc(Br)cc2)cc1Cl)c1ccccc1	0.997545
Cc1ccnc(NC(=O)N2CCN(CC3CCCCC3)CC2)n1	0.817728
CSc1nc2ccc(/N=C/c3ccc(SCC(=O)Nc4ccccc4)o3)cc2s1	0.998782
COc1ccnc(C(=O)N2CCCC(CN3CCOCC3)C2)c1	0.981176
O=C(c1cnccn1)N1C[C@H]2CN(Cc3nccs3)C[C@H]2C1	0.968842
Cc1ccc(CN2CCc3oc(C)c(C(=O)N4CCCN(C)CC4)c3C2)cc1	0.997553
CCOC(=O)c1cc(NC=C2C(=O)N(c3ccc(F)cc3)N=C2C)ccc1Cl	0.951741
CCCc1noc(CN(C)C(=O)C2CC(=O)OC23CCCCC3)n1	0.819215
COc1ccc(CN2CCC3(CC2)CN(c2ccccc2)C(=O)CO3)c(C)c1	0.991431
O=C(NCc1ccc(N2CCCC2)nc1)Nc1nncs1	0.982126
NC(=O)c1csc(N2CCCC(CNC(=O)CCc3cccnc3)C2)n1	0.810444
CC(C)c1ccc(/C=N\NC(=S)N/N=C/c2ccc(C(C)C)cc2)cc1	0.996871
Cc1ccc(C)n1CCC(=O)N1CC=C(c2c[nH]c3ccccc23)CC1	0.949944
CC(C)C1CC(N2CCCC2)CN1CC(=O)Nc1ccccc1Cl	0.905527
O=C(Nc1ccc(-c2nn3cnnc3s2)cc1)c1cccs1	0.977869
Cc1cc(-c2nn(C)c(Cl)c2CN2CCCN(c3nc4ccccc4s3)CC2)no1	0.998499
COc1ccc(C(=O)N/N=C(\C)c2c(O)cc(C)oc2=O)cc1OC	0.992829
O=C(c1cc2ncccn2n1)N1CCC(N2CCCC(C(=O)N3CCCC3)C2)CC1	0.943664
O=C(/C=C/c1cccc(C(F)(F)F)c1)N1CCN(c2ccccc2)CC1	0.930137
CCOc1cccc(/C=C2/SC(=O)N(CC(=O)N3CCN(c4ccccc4)CC3)C2=O)c1O	0.951116
CC(NCCCN1CCOCC1)=C1C(=O)C[C@@H]2[C@H]1C2(C)C	0.992967
CNCC1CCCN1C(=O)c1cccc(Oc2ccccc2)c1	0.976944
Cc1cc(C)cc(OC(=O)c2ccccc2Cl)c1	0.728094
Cc1ncnc(C(=O)Nc2nc(C3CC3)cs2)c1C	0.710572
CC1CCCCN1C(=O)c1nnn2c1COC(c1ccc(Oc3ccccc3)cc1)C2	0.927884
Cn1nccc1CCN	0.558777
COc1cc(CNCC(O)CN2CCCC2)ccc1OCc1cccnc1	0.997044
C(=Nc1ccc(Nc2ccccc2)cc1)c1ccccc1OCc1ccccc1	0.999413
CN(Cc1ccccc1F)CC(O)c1ccccc1	0.689597
CC1(C)CC2CC(C)(CN2Cc2c(O)ccc3c4c(c(=O)oc23)CCCC4)C1	0.948318
CCN(CC)c1nc(C)nc2c1sc1nc3c(cc12)COC(C)(C)C3	0.989739
O=C(CSc1nc(C2CC2)nc2sc3c(c12)CCCC3)c1c[nH]c2ccccc12	0.991595
COc1ccc(Cc2noc(-c3ccn4ccnc4c3)n2)cc1OC	0.993824
COc1ccc(-c2nn3c(=O)cc(CN4CCN(C(=O)C5CCCCC5)CC4)nc3s2)cc1	0.987566
O=C(NCc1n[nH]c2ccccc12)c1ccc2cc[nH]c2c1	0.831765
Cc1cc2nc(NC3=NC(O)C=C(CSc4nc5ccccc5[nH]4)N3)nc(C)c2cc1C	0.978751
COC(=O)C1=C(C)N(Cc2ccco2)C(=O)C1=Cc1cc(C)n(-c2ccc(Br)cc2)c1C	0.84302
COc1ccc2[nH]c(=O)c(C(c3nnnn3C3CCCC3)N3CCN(c4nc5ccccc5s4)CC3)cc2c1	0.987352
O=C(Cc1nc[nH]n1)N1CCC2(c3cccnc3)CC2C1	0.883821
CCCCCOc1ccc(C(O)C(CN2CCOCC2)c2ccccc2)cc1	0.696313
CNCC(=O)Nc1ccc(COc2cc(C)ccc2C(C)C)cc1	0.985144
CCCN1CCC(Nc2cc(-c3ccccc3)ccc2OC)CC1	0.957956
Cc1ccc(N2CCCN(C(=O)C(C)n3cccn3)CC2)nn1	0.995594
CCNC(=O)c1cc(NC(=O)c2cnc3sccn3c2=O)nc2ccccc12	0.9813
c1cnc(N2CCN(Cc3ccc4c(c3)CN(Cc3ccc(-c5ccco5)cc3)CCO4)CC2)nc1	0.998281
Cc1cc(C(=O)NCC2CCN(CC(C)C)C2)[nH]n1	0.896772
Cc1ccc2nc3sc(C(=O)Nc4ccc(C)c(F)c4)cc3cc2c1	0.997769
O=S(=O)(C1CC1)N1CCCN(c2nc3ccc(F)cc3s2)CC1	0.914335
COCC(N)C(=O)NCc1cc(C(F)(F)F)ccc1N1CCN(C)CC1	0.618452
O=C(O)c1ccc(NC(=O)c2ccncc2)cc1	0.7912
COc1cccc(C2CNCCN2Cc2nnsc2Cl)c1	0.983757
COc1ccc(C(=O)N2CCC(=O)N(CC3CC3)C3(CCOC3)C2)c(OC)n1	0.992055
Cc1n[nH]c(C2CN(C(=O)c3ccc(Cl)o3)CCO2)n1	0.935406
Cc1cc(C)c(CNC(=O)C(C)n2cncn2)c(=O)[nH]1	0.825338
NCCc1nc(C(=O)Nc2ccc(N3CCOCC3)cn2)cs1	0.993446
O=C1NC(=O)/C(=C\c2ccc(-c3ccc([N+](=O)[O-])cc3)o2)S1	0.998957
Cc1ccc(CNC(C)C2=Cc3ccccc3OC2)c(=O)n1C	0.99945
O=C(CN1C[C@H]2CNC[C@H]2C1)Nc1ccc(Cl)c(Cl)c1	0.604333
COc1ccc(C=Nc2cccc(N)c2)cc1	0.992732
O=C1CCc2cc(C(=O)N3CCc4c3cccc4[N+](=O)[O-])ccc2N1	0.975604
COc1cccc2c1OC1(CCN(C(C)C)CC1)N1N=C(c3cc(C)ccc3O)CC21	0.99523
CC1=NN(c2ccc(Cl)c(Cl)c2)C(=O)/C1=C/c1ccc(-c2ccc(C(=O)OC(C)C)cc2)o1	0.980254
Nc1c(C(=O)c2ccc(Br)cc2)[nH]c2ccccc12	0.997312
CCc1cc(Br)ccc1NC(=O)CCC1CCNCC1	0.994475
Cn1cnc2c1c(=O)n(CCCSc1nc3ccccc3c(=O)n1-c1ccccc1)c(=O)n2C	0.966467
Cc1ccc(CNC(=O)C(C)n2nnc(-c3ccccc3)n2)cn1	0.900043
CC1CN(Cc2ccn(-c3c(F)cccc3F)n2)CC(=O)N1C	0.992987
Cc1ccc(-n2c(SC(C)C(=O)Nc3cccc(C#N)c3)nc3ccccc3c2=O)nc1	0.922093
CCc1ccc2c(c1)[C@@H](NCc1nnc3ccccn13)CCO2	0.980567
CNC(=S)NN=Cc1cccc(OC)c1OCCCOc1ccc(C)c(C)c1	0.997001
CC1CC(CN)CN1Cc1cncn1C	0.947554
CC(C)c1nnc(CN2C[C@H]3C[C@H](O)[C@@H](O)C[C@H]3C2)o1	0.927918
CC(C)c1ccc(NC(=O)Nc2ccc3ccccc3c2)cc1	0.969487
COC(C(=O)Nc1nc(C)ns1)c1ccccc1	0.634649
COc1ccccc1NC(=O)COc1ccc(/C=c2\sc3nc4ccccc4n3c2=O)cc1	0.98593
COCC1CCN(C)C2(C1)CN(C(=O)c1cc3ccccc3[nH]1)C2	0.994305
COC(=O)c1cc(NC(=O)c2ccc(N3CC4CC(C3)c3cccc(=O)n3C4)c(NC(=O)c3cccs3)c2)cc(C(=O)OC)c1	0.967709
O=C(Nc1nc2c(s1)CCc1ccccc1-2)c1ccc(-c2ccccc2)cc1	0.948665
COc1nccnc1N1CCCC(N2CCCC2=O)C1	0.912347
Cc1ccnc(NC(=O)c2cc(C(C)C)nc3onc(C)c23)c1	0.977989
O=C1NC(=S)N(c2ccccc2)C(=O)C1C=Nc1ccccc1	0.888298
O=C(Nc1cccc(-c2nc3ncccc3o2)c1)c1cc(Br)ccc1Cl	0.994995
CC(=O)Oc1ccc(/C=C(\C#N)C(=O)Nc2ccc([N+](=O)[O-])cc2C)cc1Br	0.972237
CCCn1cc(-c2nccnc2CC2CCNCC2)cn1	0.920978
CC(C)NC(=O)[C@@H]1C[C@@H](N)CN1C(=O)c1ccccc1-c1ccccc1F	0.934888
COc1ccc2cc(C)c3nnc(SCc4cccnc4)n3c2c1	0.756475
COc1cc(OC)c2c(c1Cl)O[C@]1(C2=O)C(O)=C(C(CC(=O)NCCn2c(=O)c(=O)[nH]c3cc(Cl)ccc32)c2ccc(SC)cc2)C(=O)C[C@H]1C	0.896483
COc1cccc(C(=O)N/C(=N/c2ccc(OC)c(Cl)c2)NCc2ccccn2)c1	0.996718
COc1ccc(/C=C/C(=O)n2nc(-c3cccnc3)nc2NCc2ccc(F)cc2)cc1	0.904151
Cc1ccc2c(N)c(C(=O)c3ccc(Cl)cc3)sc2n1	0.998506
CCOc1cnc(N)nc1	0.965102
CC1NC(=O)CCC1NC(=O)c1ccc(Oc2ccccc2F)nc1	0.955042
O=C(c1ccccc1OC(F)(F)F)N1CCC(O)(Cc2ccccn2)CC1	0.983436
O=C(NC1CCN(Cc2nnn3c2COC(c2ccc(F)cc2)C3)CC1)c1ccncc1	0.978995
O=C(NCCCOc1ccc(CN2CCN(c3ccccn3)CC2)cc1)C1CCCCC1	0.905807
CC1COc2ccccc2CN1C(=O)NCc1cccnc1N(C)C	0.704519
Cc1nn(C)c2nc(N3CCCC(c4nc(CC(C)C)no4)C3)sc12	0.992985
CN(c1ccc(C#N)cc1)c1ccc(C=O)cc1	0.868002
CSc1cccc(C(=O)Nc2ccc(N=Nc3ccccc3)cc2)c1	0.995781
O=C(O)CCCN1C(=O)/C(=C\C=C\c2ccccc2[N+](=O)[O-])SC1=S	0.987743
O=Cc1ccc(Oc2cccc([N+](=O)[O-])c2)cc1	0.797979
Cc1cc(C)cc(-c2nnc(SCC(=O)N3CCNC3=O)o2)c1	0.915246
NC(=O)N/N=C/c1c(SCc2ccccc2)nc2ccccn2c1=O	0.996946
COC(=O)c1ccc(C)c(NC(=O)c2ccc(NC(=O)c3ccco3)cc2)c1	0.684708
CCn1c(-c2cc(NC(=O)c3cc(OC)c(OC)c(OC)c3)[nH]n2)cc2c(OC)cccc21	0.929331
COc1nc(C)cc(NCC(C)CNC(=O)c2cc(C(N)=O)ccn2)n1	0.841994
CC1(C)CCCC1NCc1csc(-c2ccccn2)n1	0.926856
Cc1nc(-c2ccncc2)ncc1-c1nsc(Nc2ccccc2)n1	0.587422
CC1(N2CCOCC2)CN(C(=O)c2cnc3nccnc3c2)C1	0.946625
O=C(c1cccc2[nH]ccc12)N1CCN(c2ccncc2Cl)CC1	0.954414
CC(=O)N1CCCN(c2ncncc2F)CC1	0.893936
CCn1cnc(C(=O)NC(C)(CNc2nccn3nnnc23)C2CC2)c1	0.967106
COC(=O)/C(C#N)=C/c1ccc([N+](=O)[O-])s1	0.879864
CCOc1ccc(OCCCC(=O)NCCc2ccco2)cc1	0.50744
Cc1nc(C)c(CC(=O)NC(C)Cc2ccc(Cl)cc2)c(=O)[nH]1	0.963833
Cc1[nH]cnc1CC(=O)NC[C@@H](C)N(C)C(=O)c1ccc2ccncc2n1	0.996873
Cc1ccc(-c2ccc(/C=N/NC(=O)c3cccnc3)o2)cc1Cl	0.965974
O=C1/C(=C\c2ccc(O)cc2)C(CSc2ccc(Cl)cc2)=NN1c1nc2ccccc2s1	0.990968
O=C(Nc1ccc(CCN2CCCC2)cc1)c1cc(F)c(F)c(F)c1F	0.570491
C=Cn1cc(CN2CCC(c3nn(C)c(=O)n3-c3ccccc3)CC2)cn1	0.992205
COc1cc2c(cc1OC)/C(=N/N=C/c1ccc3c(c1)OCO3)NC(C)(C)C2	0.966414
CC1CN(Cc2cc3c(cc2Br)OCCO3)CCN1	0.997291
COc1cccc(N2C(=O)NC(=O)/C(=C/c3c(OC)ccc4ccccc34)C2=O)c1	0.975135
CCCCOC(=O)c1ccc(NC(=O)Cc2csc(Nc3cccc(C)n3)n2)cc1	0.633461
O=C(c1cccc2cccnc12)N1CCOC2(COCCN(c3cnccn3)C2)C1	0.853532
CNCC1CCCN1C(=O)c1cc(F)c(F)cc1I	0.916376
NCCn1cc(C(=O)NCCN2CCCCC2CO)nn1	0.897732
CCOP1(OCC)=CC(c2ccccc2)=C(c2ccc([N+](=O)[O-])cc2)N=C1c1ccccc1	0.97852
Cc1ccc2[nH]c(=O)c(CN(C)Cc3nnc(-c4ccccc4)o3)cc2c1	0.99806
CC(=O)N1CCc2cc(-c3nnc([C@H]4CN(C)C[C@@H](C)O4)o3)ccc21	0.994858
CCN(CC)CC(C)NC(=O)Nc1ccc(CN)cc1	0.638124
COc1cc(OC)c2c(c1Cl)O[C@]1(C2=O)C(O)=C(C(CC(=O)NCCNc2ncccn2)c2ccc(SC)cc2)C(=O)C[C@H]1C	0.966636
OC[C@@H]1C[C@H]2CN[C@H]2C1	0.647823
COCCn1cc(CC(=O)Nc2ccc3c(c2)ncn3C)c2ccccc21	0.618586
Cc1cccc(CN2CCC3(CC2)c2ccccc2N(Cc2ccccc2)S3(=O)=O)n1	0.89785
CCOC(=O)CCCCCC(=O)c1ccc(CN2CCCC2)cc1	0.891433
CN1C(=O)/C(=N\NC(=O)c2cccc(Br)c2)c2ccccc21	0.722097
Cc1ccnc(CNc2ccnc(C(=O)N3CCCCC3)c2)c1	0.990849
COc1ccc(N2CCN(CCCNC(=O)C3CCN(C(=O)c4nnn5c4COC(c4ccc(C)cc4)C5)CC3)CC2)cc1	0.973268
COCCC(=O)Nc1ccc2c(c1)CN(C(=O)c1n[nH]c3c1CCC3)CC2	0.726296
C[C@H](Cc1cn(C)nn1)Nc1cnccn1	0.613156
Fc1ccc(-c2nnc(S)n2/N=C/c2cccc(Oc3ccccc3)c2)cc1	0.682526
CCN(CC)c1ccc(NC2=Nc3ccccc3N3C2=Nc2c(c(C)nn2-c2ccccc2)C3c2cccc(Br)c2)cc1	0.988077
Cc1nnc(CSCCC(C)(C)C)n1C	0.918877
CNC1CCCN(C(=O)Cn2ccccc2=O)C1	0.511278
O=C(CN1CCCCC1)NC[C@]1(c2ccccc2)CC[C@H](O)[C@@H](N2CCOCC2)CC1	0.700421
COc1cccc(C(=O)NCC2CCOc3ccccc32)c1	0.886454
CCn1c(C(=O)N[C@H]2CCO[C@H]2c2ncn[nH]2)cc2ccccc21	0.851345
Cc1ccc(C(=O)NC(=S)Nc2ccc3oc(-c4cccc5c(Br)cccc45)nc3c2)cc1C	0.995053
O=C1CC[C@H](COC2CCCCO2)O1	0.502403
Cc1cc(Sc2nnc(-c3ccc(Br)o3)n2Cc2ccccc2)nc(C)n1	0.90655
Cc1cc(N2CCCN(C)C(=O)C2)nc(N(C)C(C)C)n1	0.964894
CN1CCN(C(=O)c2ccoc2C2CC2)c2ncccc2C1	0.990254
Cc1[nH]c2ccccc2c1C=C(C#N)C(=O)NCc1ccco1	0.850088
COc1ccc2c(c1)CCN(Cc1ccccc1C(=O)O)C2	0.912954
COc1ccc(C(=O)Nc2ccccc2-c2nnn[nH]2)cc1CC1CCNC1	0.998111
O=C(C1CCN(c2ccc3nncn3n2)CC1)N1CCc2sccc2C1	0.964895
COc1cccc(NC(=O)NCCc2coc(-c3ccccc3)n2)c1	0.986217
C/C(=N\NC(=O)c1ccccc1Br)c1ccc(Br)cc1	0.94881
Cc1cccc2c(NCC3CN4CCCC4CO3)c(C#N)cnc12	0.9455
Cc1cccc(OCC(=O)Nc2ccc3c(c2)nc(CN2CCN(C)CC2)n3C)c1	0.945527
O=C(NCc1ccc(Cn2ccnc2)cc1)c1ccccc1SCc1cscn1	0.958001
C=CCO/N=C(/CCC)C1=C(N)CC(C)(C)CC1=O	0.831333
CCCCc1nc(CN2CCCC(N3CCN(c4ccccc4F)CC3)C2)c[nH]1	0.993494
CCc1ccc(-c2cc(C(=O)Nc3ccncc3)c3cc(Br)ccc3n2)cc1	0.825459
Cc1[nH]c2ccccc2c1CCN(C)C	0.984854
COC(=O)c1cccc(OCC(C)Nc2nccn3ncnc23)c1	0.972508
COc1ccc(/C(C)=N/NC(=S)NCc2ccco2)cc1	0.873123
CCOC(=O)CN(C(=O)COC(=O)Cn1c(=O)c2c(ncn2C)n(C)c1=O)c1ccccc1	0.748079
CCCN1CCN(CC(=O)Nc2ccccc2CC)CC1	0.979245
CCCOc1ccc(C2Cn3nc(C(=O)N4CCC(C(=O)N(C)CC(=O)N5CCCCCC5)CC4)cc3CO2)cc1	0.666788
CC1=NN(c2ccccc2)C(=O)/C1=N/OC(=O)Nc1ccc(Cl)c(Cl)c1	0.96803
CSc1ccc(F)cc1CNC(=O)C1CC12CCNCC2	0.871133
Cc1nc(C(=O)N2CCN(c3cccc(C(F)(F)F)c3)CC2)no1	0.582783
COc1ccc2cc1OCCCNC(=O)CCc1cccc(c1)Oc1cc3c(cc1OC)C2N(C(=O)c1ccc(-n2cnnn2)cc1)CC3	0.973739
COc1cccc(-c2nccn2[C@@H]2C[C@H]3CO[C@@H](CCO)CN3C2)c1OC	0.899388
O=C(CC1CCCN1)Nc1ccc(C(=O)NC2CCOCC2)cc1	0.717496
c1ccn2c(CN3CCN(CC4CCNCC4)CC3)cnc2c1	0.996548
COCC(C)CC(=O)NCC(O)CNc1nc(C(C)C)ns1	0.705757
CC(c1nc2ccccc2s1)N(C)CC1(C)CCCNC1	0.999481
COCCCN1C(=O)C(=O)/C(=C(/O)c2ccc(OC)cc2C)C1c1cccs1	0.962565
COC(=O)C1CCN(C(=O)c2ncn3c2COC(c2cccc(F)c2)C3)CC1	0.842953
CCN1CCN(CCCNC(=O)c2cc3n(n2)CC(c2ccc(C(C)C)cc2)OC3)CC1	0.619521
CNc1c(NC(=O)Nc2ccc(Br)c(C)c2)c(=O)oc2ccccc12	0.640401
Cc1nsc(N2CCN(C(=O)Nc3ccc(C(F)(F)F)cc3)CC2)n1	0.581089
Cc1noc(-c2ccc(N(C)Cc3csc(C(C)C)n3)nc2)n1	0.992833
COc1ccccc1CC(=O)NCc1ccccc1CN1CCN(C)CC1	0.939866
O=C(O)CCC1CCCCN1C(=O)Cc1c(Cl)cccc1Cl	0.696509
Cn1cc(CCOc2cnc3ccc(Br)cc3c2)cn1	0.960089
Nc1c(C=O)c(=O)[nH]c(=O)n1Cc1cccnc1	0.980635
COc1cccc(C(=O)CCCC(=O)Oc2ccc(NC(=O)c3cccnc3)cc2C)c1	0.825074
CC(C(=O)N1CCC(=O)NCCN(c2nc3cc(C)cc(C)c3o2)CC1)=C1CCC1	0.693981
COc1ccc(CN(C)CCC2COCCO2)cc1	0.902144
COc1ccc(C2=NN(C(=O)c3ccccc3Cl)C(c3cccc([N+](=O)[O-])c3)C2)cc1	0.935665
CCO[C@H]1CN(C)C[C@@H]1NC(=O)c1ccc2sc(C)nc2c1	0.994349
CCc1nc(-c2ccc(C(=O)N3CCC[C@@H](O)[C@H]3C)cc2)n[nH]1	0.998753
Cc1cc(NC(=O)N2CCC(CN3CC(C)CC(C)C3)CC2)ccc1Br	0.990236
CCC(=O)Oc1ccc(C2Nc3ccc4ccccc4c3C3=C2C(=O)CCC3)cc1OC	0.991696
O=C(NCCc1ccccc1)c1ccnc2ccncc12	0.709501
CN(C(=O)c1cc(C2CC2)on1)C1CN(c2ccc3nccn3n2)C1	0.978073
Cc1ccc(C)c(SCC(=O)OCC(=O)Nc2nc3ccc([N+](=O)[O-])cc3s2)c1	0.759826
O=C(CCn1ncc2ccc([N+](=O)[O-])cc21)NCc1ccccc1-c1ccc(Cn2cccn2)cc1	0.877754
C=CCN1C(=O)NC(=Cc2cc3c(cc2Cl)OCO3)C1=O	0.958404
CC1(C(Cl)=NOC[C@H](O)CN2CCCCC2)CCNCC1	0.996982
Cc1nnc(CNC(=O)C=Cc2cccc(OC3CCCC3)c2)n1C	0.964841
O=C(CSc1nnc(-c2cccs2)c(-c2cccs2)n1)c1ccc(Br)s1	0.627522
Cc1ccc(N2CCC(NCc3ccc(C)nc3C)C2=O)cc1	0.997342
COc1cc(C2Nc3ccc(Cl)cc3C(c3ccccc3)O2)cc(Br)c1OC	0.994664
CCO[C@@H]1C[C@@H](NC(=O)Cc2occc2C)C12CCOCC2	0.521931
O=C(N[C@H]1CCN(C(=O)c2cnc3snnc3c2)C1)c1cccs1	0.974777
COc1nc(C(C)C)ccc1-c1cnc2sc(N3CCC(O)(CN)CC3)nn12	0.936146
CCN1CCN(CCNC(=O)C2CCN(c3ncc(-c4cccc(C)c4)cn3)CC2)CC1	0.987419
COc1ccc(NS(=O)(=O)c2cc(NC(=O)c3cc(Cl)c(O)c(Cl)c3)ccc2OC)cc1	0.990972
CN(C)CCCN(CC1CCN(C2Cc3ccccc3C2)CC1)C(=O)C=Cc1cnn(C)c1	0.994839
CCOc1ccc2nc(NC(=O)CCc3ncc(-c4ccccc4F)o3)sc2c1	0.959885
COc1cc(C(=O)NCC(=O)N/N=C/c2cc(Br)ccc2OC(=O)c2ccc(Br)cc2)cc(OC)c1OC	0.724399
CSc1ccc(OCCn2cnc3ncccc3c2=O)cc1	0.938594
Cc1cc(NS(=O)(=O)c2ccc(NC(=O)c3ccsc3)cc2)no1	0.629387
Nc1nc(CCC(=O)N2CCN(C/C=C/c3ccccc3)CC2)cs1	0.91089
Cc1ccc2c(c1)nc(CNC(=O)N1C3CCC1COC3)n2C	0.911209
CC(=O)Nc1ccc(C(C)=NOCc2cc(-c3ccco3)on2)cc1	0.857004
CCOC(=O)C1=C(C)N=c2s/c(=C/c3cc(Br)c(OCc4ccccc4Cl)c(OC)c3)c(=O)n2C1c1ccc(N(C)C)cc1	0.99936
c1ccc(C[C@H]2CNCC[C@@H]2OCc2ccncc2)cc1	0.976674
O=C1/C(=C/c2ccc(Br)cc2)N=C(c2ccccc2)N1c1ccccc1	0.990481
COc1ccc(NS(=O)(=O)c2cccc(NC(=O)CCC(=O)c3cccs3)c2)cc1	0.900755
O=C(NCc1ccco1)Nc1cnc2cc(Cl)ccc2c1O	0.946199
CC1(C)CC2(CCCN2C(=O)c2csnn2)CN1c1cccc(F)c1	0.55232
O=C(Nc1ccc(Cl)cn1)C1CCCN(S(=O)(=O)c2ccc3c(c2)OCCCO3)C1	0.728314
O=C(NC1CCNC1)c1ccccc1SCc1ccc(Br)cc1	0.990245
COc1ccc(CN2CCN(Cc3cccc4cccnc34)CC2CCO)c(C)c1C	0.993996
Cc1nc(O)cc(C2CN(C(=O)c3ccc4[nH]nnc4c3)CCO2)n1	0.97675
CNc1nc(CC(C)NCCc2ccc(OC)c3ccccc23)ns1	0.961019
COc1cc2c(cc1NC(=O)c1cccc([N+](=O)[O-])c1C)oc1ccccc12	0.907086
Cn1ccnc1C(=O)c1ccc(NC(=O)c2cnccn2)cc1	0.998422
COc1ccccc1C1Cn2cnc(C(=O)N3CCN(c4ccc(C)cc4)CC3)c2CO1	0.741218
CCNC(=O)N1CCN(c2nc(CC)nc3c2cnn3-c2ccccc2Cl)CC1	0.986634
CC(Cl)C(=O)NC1CCN(Cc2ccccc2)CC1	0.993708
COc1ccc2cc(-c3cccnc3C)ccc2n1	0.507006
CCCOC1CCCN(C(=O)c2cn(CCN3CCNCC3)nn2)C1	0.975699
Cc1cc2c(=O)[nH]c(=S)[nH]c2s1	0.794321
COc1ccc(C2=NN(C(=O)CN(CCN3CCOCC3)C(=O)c3ccccc3Cl)C(c3ccco3)C2)cc1	0.868585
COc1ccc(CN(C)[C@@H]2CN(C(=O)c3nccn3C)C[C@H]2O)cc1	0.960058
CC(C)CC(=O)Nc1ccc(C(=O)Nc2ccccc2)cc1	0.577706
CCC(c1nnnn1Cc1ccccc1)N(CCCO)Cc1cc2cccc(C)c2[nH]c1=O	0.996089
CCc1n[nH]/c(=N/C(=O)CCC(=O)N2CCN(C3CCCC3)CC2)s1	0.886317
CC(C)CNC(=O)C1CCN(C2CCN(c3nc4ccccc4o3)CC2)CC1	0.765015
CN(C(=O)c1ccn(C)n1)C1CCN(c2ccc3ccc(Br)cc3n2)CC1	0.995966
CSCCC(C)N1CCN(c2nc(-c3ccccc3)nc3c2CCC3)CC1	0.940741
CC1CN(C(=O)COCc2nc(C3CC3)no2)CCC1NC(=O)c1cccc2[nH]c(=O)n(C)c12	0.659391
CNC(=O)CN1CCC2(CCCN(C(=O)c3ccncc3)C2)CC1	0.958716
COCC(=O)NCCNc1ccc(-n2ccc(C)n2)nn1	0.961349
Cc1ccnc(N/C=C2/C(=O)N(c3ccccc3)C(=O)c3ccccc32)c1	0.963455
CC(C)c1ccc(/N=C(/NCCc2c[nH]c3ccccc23)NC(=O)c2cccc(N(C)C)c2)cc1	0.910279
Cc1cc(C(=O)NC(CN)C2CC2)c(F)cc1F	0.975918
COc1ccc(CC(=O)NC[C@H]2CC[C@H](C(c3ccccn3)N(C)C)CC2)cc1	0.997617
CCOc1ccccc1N1C(=O)N=C(O)C2(Cc3ccccc3N3CCN(C)CC32)C1=O	0.725303
Cc1nc(N2CCN(C)CC2)c2sc(=S)n(C)c2n1	0.9911
CN1CC[C@H]2CC[C@@H](C1)N2c1nc2ccccc2o1	0.87509
CC(C)(C)c1ccc(CNC(=O)CC2(O)CCOC2)c(=O)[nH]1	0.840904
O=C1NCCN1C1CCCN(c2nc3ccccn3c(=O)c2[N+](=O)[O-])C1	0.975522
CCOc1cc(C=C2NC(=O)N(Cc3ccc(F)cc3)C2=O)ccc1OCc1cccc([N+](=O)[O-])c1	0.975427
Brc1ccc(-c2nnc(CSc3ncnc4sccc34)o2)o1	0.976273
CN(C)c1cccc(NC(=O)CCCc2c[nH]c3ccccc23)c1	0.650061
CCN(CC)C(=O)[C@@H]1C[C@@H](NC2CCCCCC2)CN1Cc1cccnc1	0.978584
Cc1nc(C2CC2)oc1C(=O)N1CC(N(C)C)Cc2ccccc21	0.992942
COc1ccc(CCC(=O)N2CCCCC3(CCN(Cc4ccccc4)CC3)C(=O)OC[C@@H](O)[C@@H](O)CC2)cc1OC	0.925206
CC1CC1C(=O)Nc1cccc(C#Cc2ccccn2)c1	0.691109
COc1ccc(C=C2C(=O)NC(=O)N(Cc3ccccc3)C2=O)cc1[N+](=O)[O-]	0.99193
CN(C)[C@]1(c2ccccc2)CCN(C(=O)c2ccnc3c2ncn3C)C[C@H]1O	0.896437
Cc1cccnc1Oc1ccc(C(=O)N2CCC[C@@H]2CN)cc1	0.992285
O=[N+]([O-])c1cccc(C2Nc3c(Cl)cc(Cl)cc3C3C=CCC32)c1	0.987162
Cc1ccc(C(=O)NNC(=O)CCN2C(=O)/C(=C/c3cccc(Br)c3)SC2=S)cc1	0.628487
c1ccc(N2CCN(c3nc(N4CCCC4)nc(N4CCCC4)n3)CC2)cc1	0.877348
CN(CC(=O)N1CCCCCC1)C(=O)c1nnn2c1COC(c1ccc(Oc3ccccc3)cc1)C2	0.681767
CCC1CCC(NCc2ccccc2OC)CC1	0.989074
CN1CCc2nc(NC(=O)c3ccc4c(c3)CCC(=O)N4C)sc2C1	0.992039
CC1(C)CN(C(=O)c2ccc(Br)cc2)c2ccccc2O1	0.778186
CSc1ccc(NC(=O)Oc2cccc(OC(C)=O)c2)cc1	0.908908
NCC1CCCCC1NC(=O)c1ccc2c(c1)[nH]c(=O)n2C1CCCC1	0.828668
COc1cc(/C=N/NC(=O)CNS(=O)(=O)c2ccc(C)cc2)cc(Br)c1OCc1ccccc1Cl	0.994068
COc1cccc2sc(N(Cc3ccccn3)C(=O)Cc3ccc(Cl)s3)nc12	0.741729
CC(=O)NCCn1cnc(-c2ccccc2)c1-c1coc(-c2ccccc2)n1	0.729995
Cc1cc(C)n(-c2ccc(C(=O)Nc3cccc(C(=O)N4CCOCC4)c3)cn2)n1	0.99235
Cc1nn(C)cc1CNC(=O)C1CCCN(C2CCN(Cc3cccnc3)CC2)C1	0.995511
Cc1cc2c(N3CCN(c4ccc(NC(=O)C5CC5)nc4)CC3)nccn2n1	0.831117
O=C(c1cc(-c2ccccc2)on1)N1CCc2oc(C3CCOCC3)nc2C1	0.929773
Cc1cc(C)cc(OCc2nc(CN(C(=O)Cc3ccccc3)C3CC3)cs2)c1	0.995959
Cc1ccccc1-n1ncc(C(=O)N(C)C2CC(N)C2)c1C	0.987423
COc1ccc(C(=O)N[C@@H]2CO[C@H]3[C@@H]2OC[C@H]3O)cc1Oc1ccc(CN)cc1F	0.815079
Clc1cccc(C2CCCNC2)n1	0.864598
O=C(C=Cc1ccc2c(c1)OCO2)N1CCn2cccc2C1c1ccccc1	0.982972
COc1ccc(C)cc1C(=O)C=Cc1cnn2cccnc12	0.979138
Cc1cc(C)n(CC(=O)N2CCCN(Cc3ccncc3)CC2)c(=O)n1	0.922818
Cc1ccnc(NC2CCCN(CCc3ccncc3)C2)n1	0.946492
COc1cc(NC(=O)CSc2ncccc2C#N)cc(OC)c1OC	0.926224
COc1ccc(CN(C)Cc2ccc(C)o2)cc1OCC(O)CN1CCCCC1	0.996792
CCCc1nccn1-c1ccc(C(O)CN2CCOCC2)cc1	0.846673
CCN(CC)C(=O)CN1CCCC(O)(COc2ccc(C)c(C)c2)C1	0.977592
O=C(NCCc1csc(-c2cccnc2)n1)c1nnc2n1CCCCC2	0.956969
CC1C(C)N(C(=O)c2cncc3nc(C(F)(F)F)[nH]c23)CCN1C	0.933806
Cc1noc(-c2cn(C3CCN(C(=O)c4ccc5[nH]ccc5c4)CC3)nn2)n1	0.991625
Cc1ncc(Br)cc1NCc1ccnn1C	0.563191
COc1cccc(C2C3=C(N=c4s/c(=C\c5cccc(OCc6ccc(Br)cc6)c5)c(=O)n42)c2ccccc2CC3)c1	0.771234
CN(C)CC1COC2(CCCC2)CN1C(=O)NC1CCC(=O)N(C)C1	0.685251
CN(Cc1ccccc1OC(F)(F)F)Cn1nnc2ccccc2c1=O	0.904259
Nc1nnc(SCC(=O)N2CCCC2c2ccc3c(c2)OCCCO3)[nH]1	0.725654
CCn1cc(C(=O)NCCc2ccc(O)cc2)c(=O)c2ccc(C)nc21	0.998694
Cc1cc(-c2nc(C3(N)CCCC3)no2)sc1C	0.938585
Cn1c(SCC(=O)N2CCN(c3ccccn3)CC2)nnc1-c1cccnc1	0.967242
CCOc1ccc(C2C(=C([O-])c3ccc(OC)c(C)c3)C(=O)C(=O)N2Cc2ccc[nH+]c2)cc1	0.999381
N[C@@H]1CCN(C(=O)Cn2c(COc3ccc(Cl)cc3)nc3ccccc32)C1	0.895862
Cc1ccc(-c2nnc(CCC(=O)Nc3ccc4nc(N5CCOCC5)sc4c3)o2)cc1	0.989691
Cn1ccnc1COc1ccc(NC(=O)c2cc(F)cc(F)c2)cc1	0.912287
CCC1CN(C(=O)[C@@H]2CCN(C)[C@H](C)C2)CCCO1	0.855875
Cc1nc(C(=O)N2CCC(Oc3cccnc3N(C)C)C2)no1	0.988368
C=CCn1c(C(=O)N2CCCC2)nnc1N1CCC(CN2CCOCC2)CC1	0.531677
CC(C)(C)OC(=O)CCc1cccc(NCc2ncccn2)c1	0.63788
CC(O)CN(C)Nc1ccc2ncccc2c1[N+](=O)[O-]	0.572734
O=C(CN1CCCCCCC1)N1C[C@H](O)[C@@H](N2CCCC2)C1	0.787146
CC(=O)N1CCCOc2cccc(c2)CCC2CCCCN2CC1	0.929675
CC(C)Cn1ccnc1CNC(C)Cn1cc(Br)cn1	0.921344
CC(CNC(=O)c1ccc2[nH]c(=O)[nH]c2n1)CNc1ccc(C#N)cn1	0.836427
CCCCOc1ccc(C=C2SC(=O)N(CN3CCN(c4ccccc4)CC3)C2=O)cc1	0.974747
COc1cc(C=C2c3ccccc3Cn3c2nc(=O)c2ccccc23)c(OC)cc1C	0.861374
COc1cc(NC(=O)C(C)C)c(C(=O)OCc2cc(=O)oc3c(C)c(C)ccc23)cc1OC	0.868785
OCCCCn1c(-c2ccccc2)nc2ccccc21	0.947668
COc1ccc(C2CNN=C2C(=O)c2ccc3ccccc3c2)cc1	0.857725
COc1ccc(-c2cnnc(N/N=C/c3cc(Br)ccc3OC)n2)cc1	0.985508
Cc1cccc(-c2nnc(-c3ccc(C(=O)OCC(=O)Nc4cccc(N5CCCC5=O)c4)cc3)o2)c1	0.959314
CCn1cc(C(=O)NC[C@H]2CC[C@H](c3nnc(-c4ccccn4)o3)CC2)cn1	0.760073
COc1ccc2cc(C(=O)NC[C@@H]3CCCN4CCCC[C@H]34)n(C)c2c1	0.991358
CCCSc1nnc(NC(=O)c2ccc3nnsc3c2)s1	0.628165
Cc1cc(NCc2ccc(Oc3cccnc3)c(F)c2)nc2ccccc12	0.99917
CC(C)(C)C1CCc2nc3ccccc3c(C(=O)N3CC[C@@H](N)C3)c2C1	0.943463
COc1cc(C2NC(=O)CCC2[N+](=O)[O-])cc(Cl)c1O	0.94041
C[C@H]1CNCCN1C(=O)Cc1ccccc1C(F)(F)F	0.583579
NCC1CCCCN1C(=O)Nc1cc(Cl)cc(Cl)c1	0.777369
CNC(=O)c1ccc(NC(=O)c2cc(O)c(Br)cn2)nc1	0.968891
O=C(C1C=CCN1)N1CCC2(CCc3c2nc(C2CC2)[nH]c3=O)CC1	0.969431
CCOc1ccc(NC(=O)CCCC(=O)OCC(=O)Nc2ccc(Br)c(C)c2C)cc1	0.727198
Cc1c(C(=O)N2CC[C@@]34OCCCN3C(=O)C[C@@H]24)n(C)c2c(C)cccc12	0.818887
CCOCCOC1CCOC2(CCN(C(=O)c3cc(C)n(CCCOC)c3C)CC2)C1	0.898323
O=C(CN1CCN(c2ncccn2)CC1)Nc1ccc(F)c(Cl)c1	0.959514
Cc1c(CN)c(NC(=O)c2cc3ccccc3n2CC(F)(F)F)nn1C	0.713247
CCOC(=O)c1ccc(-n2nnc3c(sc4nc(C)c(Cl)c(C)c43)c2=O)cc1	0.994071
CC(C)(C)c1ccc(OCCCC(=O)N2CCNCC2)cc1	0.917074
O=C(NCCCc1ccccc1)c1coc(CN2CCN(c3ncccn3)CC2)n1	0.51917
Cc1csc(CNCC(C)(C)NC(=O)OC(C)(C)C)n1	0.96526
CC(=NNc1ccc([N+](=O)[O-])cc1[N+](=O)[O-])C1CC1c1ccccc1	0.829561
CCc1ccc(OCC(=O)N2CCN(c3ccccc3F)CC2)cc1	0.929497
O=C(Cc1ccn[nH]1)Nc1ccc2c(c1)CCN2C(=O)c1cccnc1	0.992214
CCCN(C)c1ccc(C(=O)NCCCN2CCNCC2)cc1	0.995529
CSc1ncc(CN2C[C@H]3CC[C@@H]2CN(C2Cc4ccccc4C2)C3)cn1	0.995383
O=C(c1cccnc1)N1CCCC2(CC(Oc3cccnc3)CO2)C1	0.977977
CN1CCC(N(C)CC(=O)Nc2ccc3c(c2)OC(F)(F)O3)CC1	0.607975
CCOC(=O)C1=C(Nc2ccccc2F)S/C(=C/c2ccccc2O)C1=O	0.93943
S=C(NCCC(c1ccccc1)c1ccccc1)NC1CCCC1	0.618818
O=C(c1ccc2nccn2c1)N1CCN(C2CCOC2)CC1	0.992065
O=C(O)c1cccc(CN2CCCC(Cc3nccnc3-c3ncc[nH]3)C2)c1	0.747185
CCCN(C)c1nc(SCc2ccc(C(=O)NC(C)c3ccccc3)cc2)nc(C)c1C	0.971119
COc1ccc(N2CCCN(C(=O)C3CCN(C)C(=O)C3)CC2)cc1	0.978795
NC1CCN(C(=O)Cc2ccc(-c3ccccc3)cc2)C1	0.921468
Cc1ccc2c(=O)c(C(=O)c3ccc(Br)cc3)cn(CC(=O)NCc3ccc(F)cc3)c2n1	0.988352
Cc1cccc(NS(=O)(=O)c2cc(-c3nc(C)c(C(=O)N4CCCCC4)s3)n(C)c2)c1	0.792929
Cc1cccc(C)c1CN1CCN(c2nc(N)ns2)CC1	0.666147
CC(C)Cc1nn(-c2ccccc2)cc1C=C1CCCC(=Cc2cn(-c3ccccc3)nc2CC(C)C)C1=O	0.943703
Cc1nc(-c2ccc(CNC(=O)c3ccc(CN4CCCCC4)cc3)s2)cs1	0.642916
Fc1cnc(NCC23CCC(CC2)O3)cn1	0.995239
O=C(O)c1cc(Br)c2[nH]c(-c3ccc(Cl)cc3)nc2c1	0.784134
COCc1cc(C)nc2sc(C(=O)OC)c(NC(=O)c3ccco3)c12	0.978214
O=C(C=Cc1ccc([N+](=O)[O-])cc1)Nc1ccccc1	0.992584
CCn1cc(C(=O)NC(C)C(=O)NCCNC(=O)c2ccncc2)c(=O)c2cc3c(cc21)OCO3	0.929718
Cc1ccc(-c2nn(-c3ccccc3)cc2C(=O)NCC(N)C2CC2)o1	0.914329
Cc1noc([C@@H]2CC[C@H](CNS(=O)(=O)c3cc(Cl)cnc3N)O2)n1	0.92727
O=C(CNCC1CC1)Nc1nc(-c2ccc3c(c2)CCC3)cs1	0.620845
COc1cc(C)sc1C(=O)Nc1ncc(C2CCNCC2)s1	0.969553
C[C@H](CNc1nc(-c2ccccc2)ns1)NC(=O)Cc1ccn(C)n1	0.608771
COc1cc2ccccc2cc1C(=O)NC(=S)Nc1ccc(Br)cc1	0.717784
COc1ccc2occc(=O)c2c1	0.935516
Cc1nc(C(=O)NCC2CC(F)C2)nc(N2CC[C@@H](N)C2)c1C	0.944187
CCNCC1CCN(CC(=O)NCC2CC2)CC1	0.937198
COc1ccccc1OCCNC(=O)c1cc(C)nc2c1c(C)nn2C	0.990438
O=C(Nc1cccc(NC(=O)c2ccc(Cl)cc2Cl)c1)c1cccc([N+](=O)[O-])c1	0.984788
CC(/C=N/NC(=O)CNc1cc(Br)c(Br)cc1Br)=C\c1ccc(C(C)C)cc1	0.959668
Cn1cnc2cc(C(=O)Nc3ccc(OCC4CCCO4)cc3)ccc21	0.985691
O=C1NC(=S)N(c2ccccc2Cl)C(=O)/C1=C\c1cn(Cc2ccccc2)c2ccccc12	0.966138
CN1CCN(C(=O)c2cn(C3CCNCC3)nn2)c2ccccc21	0.995589
C[C@@H]1[C@H](C(=O)Nc2cc3cc[nH]c3cn2)CCN1C	0.680818
O=C(c1cncn1-c1ccccc1)N1CCCC(C2CCCNC2)C1	0.87189
CNC1CCCN(Cc2c[nH]nc2-c2cccs2)C1	0.99596
O=C(NN=Cc1cccc(Oc2ccc([N+](=O)[O-])cc2[N+](=O)[O-])c1)c1ccncc1	0.996595
COc1ccc(C2=NN(S(=O)(=O)c3ccccc3)C(c3ccccc3)C2)cc1OC	0.737928
C#CCOc1cc(CNC(=O)CNC)ccc1OC	0.946526
CCN(CCN1CCOCC1)C(=O)C1CC(=O)OC12CCCC2	0.773021
CN(C)c1ccc(CNC2CCN(C(=O)OC(C)(C)C)c3cc(F)ccc32)cn1	0.995773
COc1ccc(N2CCN(c3ncc([N+](=O)[O-])c4nc[nH]c34)CC2)cc1	0.710655
O=C(NN=Cc1ccc(Sc2cccc3cccnc23)o1)c1ccccc1[N+](=O)[O-]	0.991152
NCC(=O)NCC(=O)N1CCN(c2ncnc3sccc23)CC1	0.982013
CC(C)(C)NCCc1cn(-c2ccc(Br)cc2)nn1	0.992752
C(=C/c1nc2ccccc2n1CCc1ccccc1)\c1ccco1	0.981236
O=C(NCCN1CCOCC1)c1cn(-c2ccccc2)c(=O)c2ccccc12	0.925808
Cc1cccc(OCCNCC2CC2)c1	0.954049
COc1cccc(C2CN(C(=O)Cn3cnc4ccccc43)CCN2)c1	0.931241
CC(=O)O[C@H]1C[C@H]([C@H](C)CC/C=C(\C)C(=O)O)[C@@]2(C)CC=C3C(=CC[C@H]4C(C)(C)C(=O)CC[C@]34C)[C@]12C	0.633009
N#CC(=CNc1ccccc1)c1nnn[nH]1	0.885636
OCCOc1c(Cl)cccc1Cl	0.528941
Cc1cccn2c(=O)c(C=C3SC(=S)N(CC4CCCO4)C3=O)c(Oc3ccccc3)nc12	0.997914
c1cc(N2CCCCC2)ncc1-c1noc(C2CCCNC2)n1	0.995062
CCC(O)CN1CCN(C(C)C)CC1	0.86339
Cc1cc(N2CC3CC(C2)N3S(=O)(=O)c2ccc(C#N)cc2)nc(C)n1	0.517046
Cc1cc(C)n2nc(C(=O)NC34CCN(CC3)C4)nc2n1	0.950947
CC(NC(C)(C)CNC(=O)CNc1ccccc1)c1ccccc1	0.807043
NC(=O)CCc1cccc(-c2nc3ccccc3o2)c1	0.991028
Cc1cc(N(C)C)cc(C2CCN(C(=O)/C=C/c3cccnc3)C2)n1	0.521582
CC1CN(Cc2ccc(CNc3cccc(C(=O)O)n3)cc2)CC(C)O1	0.750148
COc1ccc(N2CCN(S(=O)(=O)c3ccc(C)cc3)CC2)cc1	0.572416
COc1ccc(CS(=O)(=O)Cc2ccccc2OC(C)C)cn1	0.97996
CCOc1ccc(/C=N/c2cn(C)nc2C(=O)NCc2ccco2)cc1	0.673856
O=C(Cc1ccccc1)Nc1ccc(N2CCCN(Cc3ccccc3[N+](=O)[O-])CC2)nc1	0.910822
O=C(c1cc2c(s1)CCOC21CCNCC1)N1CCCC(c2cc[nH]n2)C1	0.993591
COc1ccc(Cl)cc1C(O)=C1C(=O)C(=O)N(c2ccccn2)C1c1cccnc1	0.999278
O=C(Nc1ccc(I)cc1F)c1ccc2ncccc2c1	0.993519
O=C(c1ccccc1)N1CCC(Cc2nnc(C3CC3)[nH]2)CC1	0.930032
CCN(CC)c1ccc(C(=O)Nc2nccs2)cc1	0.93493
COc1cc(-c2nc(-c3ccc(C(C)(C)C)cc3)no2)nc2cc3c(cc12)OCCO3	0.526374
O=C(O)c1csc(CC2CCN(Cc3cnc(C4CC4)s3)C2)n1	0.917105
CCn1cc(/C=C2\Oc3c(ccc(OCc4ccccc4Cl)c3C)C2=O)c2cc(OC)ccc21	0.981844
O=C(OCc1nc2cc(C(F)(F)F)ccc2o1)C1CC(=O)N(c2ccc(F)cc2)C1	0.673474
Cc1nc(C(=O)NC[C@@H](C)NC(=O)Cc2cnc3ccccc3c2)n[nH]1	0.996367
COc1cc(C=C2SC(Nc3ccccc3C)=NC2=O)cc(OC)c1O	0.919591
Cc1nc(C2CCCCCN2C(=O)c2cncc(OC(C)C)c2)no1	0.984019
C=Cc1ccc2c(c1)CN(CCCCCCCC(=O)N1CCCN(C(=O)c3cc(Cl)c[nH]3)CC1)C2	0.879305
O=C(Nc1cccc([N+](=O)[O-])c1)c1cn(-c2ccccc2)nc1-c1cccc(Cl)c1	0.862667
Cc1ccc(-c2nn(-c3ccccc3)cc2C=C2SC(=S)N(Cc3ccccc3Cl)C2=O)cc1F	0.670502
CC(c1ccc2c(c1)OCCO2)N(C)Cc1nnc(CC2CCNCC2)n1C	0.996238
O=C(Nc1cc(Cl)ccc1Cl)C1CCCN1CCN1CCCCC1	0.971991
Cc1c(Cl)c(C(=O)NC(C)CN(C(C)C)C(C)C)nn1C	0.949313
COc1ccc(Oc2c(C)oc3cc(OCC(=O)NC4CC4)ccc3c2=O)cc1	0.893055
O=C(C1CN(c2cc(=O)n3ccccc3n2)CCO1)N1CCOCC1	0.958148
CN1CCN(C(=O)CCNC(=O)c2ccc(CN)cc2)CC1	0.997121
O=c1cc2c(nn1CC1CN(c3cc(=O)n4ccccc4n3)C1)CCC2	0.893789
Cc1cc(NC(=O)c2ccc([N+](=O)[O-])cc2)n(-c2nc(-c3ccc(F)cc3)cs2)n1	0.994896
Clc1cncc(OCC2CN(C3CCN(Cc4ccccc4)CC3)C2)n1	0.876927
O=C1N/C(=N\c2ccc3ccccc3c2)SC1=Cc1ccco1	0.670635
COc1ncc(S(=O)(=O)N2CCC(C)(N(C)C)C2)cc1C	0.64072
Cc1cncc(CC(=O)N2CC3CC2CCC3NC(=O)C2Cc3ccc(C)cc3S2)c1	0.820582
COc1ccc2cc1OCc1cn(nn1)CCOc1ccc(F)cc1C(=O)N1CCC(CC1)NC2=O	0.987059
CCOc1cc(C(Nc2cccnc2)c2ccc3cccnc3c2O)ccc1O	0.999448
Cc1nn(C)c(C)c1/C=C/C(=O)N1CCCC(c2nccnc2Nc2ncccn2)C1	0.856838
CC(C)Cn1c(NCCCNC(=O)COc2ccc(Cl)cc2)nc2ccccc21	0.909398
COc1cc(/C=C(/C#N)c2nc(-c3ccc(Cl)cc3Cl)cs2)cc(Br)c1O	0.582833
Cc1nc(N2CCCC(c3ccncn3)C2)c2sccc2n1	0.922026
Cc1cc(C(=O)Nc2cccc(C)c2C(=O)N2CCCC2)c2cnn(C)c2n1	0.985047
Oc1ccc(CN(CC2CCN(C3CCCC3)CC2)CC2CCCO2)cc1Cl	0.988909
CN(NC(=O)c1ccc2ccccc2n1)c1ccccc1	0.985769
O=C(NC(=S)Nc1ccccc1[N+](=O)[O-])c1ccc(Br)cc1	0.984497
c1ccc(COc2cccc(CNc3ccc4c(c3)OCO4)c2)cc1	0.997014
Cc1nc(C(=O)NC2(C)CC(F)(F)C2)nc(N2CC[C@@H](N(C)C)C2)c1C	0.662581
COc1cc(C)c(C)cc1S(=O)(=O)NCCc1cc2c(C)ccc(OC)c2[nH]c1=O	0.752513
Cc1ccn(-c2ccc(C(=O)NC3CCc4nnc(C)n4C3)cc2)n1	0.678579
Cc1noc(-c2ccccc2OC2CCN(C(=O)C3CCOCC3)C2)n1	0.55685
Cc1nc2c(c(NCc3ccsc3)n1)CCN(CC1CCOC1)CC2	0.99552
Cc1nc(N2CCN(Cc3ncccc3C)CC2)c2c(C)noc2n1	0.993592
O=C(Nc1ccc(OC(F)(F)F)cc1)c1csc(NS(=O)(=O)c2cccs2)n1	0.679701
CCc1ccc(NC(=O)COC(=O)c2ccc3c(c2)OCO3)cc1	0.728784
COCCCOC(=O)c1cnc2ccccc2c1C	0.977847
O=[N+]([O-])c1c(Nc2ccc3c(c2)OCCO3)nc2ccccn12	0.898068
O=C(CCCn1cncn1)N1C[C@@H]2C[C@H](C1)[C@@H]1CCC[C@H](c3ccccc3)N1C2	0.723746
CCc1cccc(-n2cc(C(=O)N3CCC(NC(=O)CCCc4ccccc4)CC3)nn2)c1	0.707976
CN(Cc1ccc(Br)s1)Cc1cc2c(cc1O)OCO2	0.998342
CCC[C@H]1CCC[C@H]2[C@H]3C[C@H](CN(C(=O)c4ccc(CO)cc4)C3)CN12	0.560603
CNc1ccc(C(=O)Nc2ccc(CCN3CCOCC3)cc2)cc1F	0.998135
COCCCN1C(=O)C(=O)/C(=C(/O)c2ccc(OCC(C)C)cc2)C1c1ccc(OC)cc1OC	0.893928
CCC(=O)Nc1cccnc1-c1ccc(C(=O)Nc2cc(OC)cc(OC)c2)cc1	0.997839
Oc1cc(-c2ccc(Cl)cn2)cc2c1OCCN(c1nccs1)C2	0.962597
CCOC1CCOC2(C1)CN(c1cc(N(C)C)ncn1)C2	0.973121
COc1cc(C=CC(=O)N2CCN(CC(O)COc3ccc(C(C)=O)c4c3OCCO4)CC2)cc(OC)c1OC	0.996547
c1ccc(-c2nc(CNC3CCN4CCCC4C3)co2)cc1	0.99595
COc1ccccc1/C=N/c1ccc(O)c(-c2nc3ccccc3s2)c1	0.999482
CC(C)C[C@H](NC(=O)c1cccn1C)c1nc(C(=O)N2CCN[C@H](C)C2)co1	0.934403
COc1ccc(NC(C)=O)cc1S(=O)(=O)Nc1nc(C)nc2sc(C)c(C)c12	0.523097
CN1CCC(CCNC(=O)CC2CCNCC2)CC1	0.995263
NC(=O)c1cnc2ccc(N3CCCN4CCCC4C3)cc2c1	0.691813
O=C(c1cscn1)N1CCCC2(CCN(C(=O)c3csnn3)CC2)C1	0.994717
CC(=NO)c1ccc(NC(=O)Nc2ccccc2)cc1	0.992872
CCc1nc(C)cc(N2CCC3(CC2)C(=O)N(CCCO)C(=O)N3CC(C)C)n1	0.696371
Cc1cc(C(=O)N2CCOC(CCc3ccncn3)C2)on1	0.981412
CCc1c(C)noc1NC(=O)C1CCCCCC1	0.736642
CCc1ccc(C2Cn3nc(C(=O)Nc4cccc(C)c4)cc3CO2)cc1	0.528083
O=C(C1CCCO1)N1CCc2nc3ccccn3c(=O)c2C1	0.988163
Cc1cc(OCC(=O)Nc2cc(C(F)(F)F)ccc2N2CCCCC2)cc(C)c1Cl	0.840797
COc1cc2c(cc1OC)C1(CCN(C(=O)CCN)CC1)OCC2	0.981597
Fc1c(F)c(C(F)(F)F)c(F)c(F)c1Sc1nc2ccccc2o1	0.950625
COc1c(C)cc(C(=O)N2CCC3(CN(C)C3)C2)cc1C	0.993036
CC1CCN(C(=O)C2CCN(C(=O)c3ccc(C(=O)O)nc3)CC2)CC1	0.567947
O=C(c1ccc2c(c1)OCCO2)N(C1CCNCC1)C1CC1	0.996613
COc1ccc(C(=O)NC(=Cc2ccc(-c3ccc(Br)cc3)o2)C(=O)NCCCN2CCOCC2)cc1	0.899976
Cc1nnc(-c2nc3ccccc3nc2C)s1	0.996451
O=C(NCc1ccc(S(=O)(=O)N2CCOCC2)cc1)C1CCNCC1	0.909206
O=C(NC(=S)Nc1cccc([N+](=O)[O-])c1)c1cccc(F)c1	0.978092
CCCNC(=O)N1CCN(c2nc3cccnc3s2)CC1	0.990668
CCOC(=O)COc1nc2c3c4c(sc3nc(C)n2n1)COC(C)(C)C4	0.82326
CCc1ccc(CON)cc1	0.541203
COc1cc(/C=C2\SC(=S)N(c3ccccc3)C2=O)ccc1OCCCOc1ccccc1	0.995511
CCOc1ccc(Br)c(/C=C2\SC(=S)NC2=O)c1	0.666411
NCCc1nc(C(=O)NC2CCC(C(F)(F)F)CC2)cs1	0.953239
CCc1nc(C)c(C)c2nn(CC#N)c(=O)n12	0.721465
CCCN1C(=O)/C(=C\c2ccc(O)c(Br)c2)S/C1=N/c1ccccc1	0.673783
Cc1c(N=Cc2cc(Cl)ccc2O)cccc1-c1nc2ccccc2o1	0.996722
Cc1cccc(NC(=O)C(C)Nc2ccc(-c3csc(C)n3)cc2)c1	0.956766
Cc1cccn2c(CC(=O)N3CC[C@H](C(=O)O)[C@H](C)C3)cnc12	0.905267
COc1ccc2c(c1)c(CN(C)Cc1n[nH]c3c1CCCC3)cn2C(C)C	0.854968
O=C1CN(C(=O)CNc2cccnc2)CCCNC(=O)c2cc(Cl)ccc2OCCN1	0.73544
CN1CCC2(CCC1=O)CN(C(=O)Nc1cccc(C#N)c1)CCN2C	0.594581
Cc1ccc(NS(=O)(=O)c2ccc(Cl)c(C(=O)Nc3ccccc3[N+](=O)[O-])c2)cc1	0.978364
CC(=O)NN=Cc1cccnc1	0.983994
CC(=O)/N=c1/n(C)c2ccccc2n1CC(=O)c1cccs1	0.501563
Clc1cccnc1NC1CCNCC1	0.994392
CN(Cc1ccn(C)c(=O)c1)Cc1ccccc1N1CCOCC1	0.986486
O=C1C(=Cc2ccc([N+](=O)[O-])cc2)SC(=S)N1c1cccc(O)c1	0.968295
Cc1cc(C(=O)NNC(=O)c2ccncc2)ccc1[N+](=O)[O-]	0.994003
Cc1ccc(CNCc2ccc(OCC(O)CN(C)Cc3ccccc3)cc2)s1	0.793517
Cc1cc(C(=O)N2Cc3nnc(C4CC4)n3[C@@H](C)C2)c2ccc(F)cc2n1	0.969924
OC(CNCc1cc(Cl)ccc1OCc1ccccc1Cl)c1ccccc1	0.995666
CC(CC(=O)NC1CCN(Cc2ccccn2)CC1)C1CCCNC1	0.991676
COc1cc(C(=O)OCC(=O)c2ccc[nH]2)ccc1OCc1ccccc1	0.982599
CCOc1ccccc1C(=O)Nc1ccc([N+](=O)[O-])cc1C	0.562237
Cc1ccc(C2=NN3C(C2)c2cc(Cl)cc(Cl)c2OC3c2ccncc2)cc1	0.989079
Cc1ccc(C(=O)Nc2cc(C)ccc2O)cc1	0.829586
COC(=O)c1ccc(Oc2c(C)oc3cc(OC(=O)c4ccccc4)ccc3c2=O)cc1	0.972051
COc1ccc(S(=O)(=O)Nc2ccc(S(=O)(=O)Nc3cccc(C(F)(F)F)c3)cc2)cc1	0.679077
CCOc1cc(/C=N/NC(=O)COc2ccc(C(C)C)cc2)ccc1OC(=O)c1ccc(Cl)cc1Cl	0.985288
COc1ccc(-c2cnc(N)nc2-c2ccc(OCc3ccccc3Cl)cc2O)cc1OC	0.994044
CNc1ncc(C(=O)N2CC[C@@H]3[C@@H](CCC(=O)N3CCCSC)C2)cn1	0.991299
CN(Cc1cc(O)c2cc(Cl)ccc2n1)[C@@H]1CS(=O)(=O)C[C@H]1O	0.76969
COc1ccc(-n2nnc(-c3nc(-c4ccc(F)cc4)no3)c2N)cc1	0.730664
Cc1ccc2nc(NC(=O)NCCc3ccn(C)n3)sc2n1	0.999347
O=C(Nc1ccc2c(c1)OCO2)N1CCN(c2ccc3nncn3n2)CC1	0.969202
COc1ccc(C(=O)N2CC(C)CC(C(=O)O)C2)c(OC)c1OC	0.811043
COc1cc(C(NC(=O)CCl)NC(=O)CCl)ccc1OCCC(C)C	0.539636
O=C(Oc1cccc(Oc2ncc(C(F)(F)F)cc2Cl)c1)c1ccc(Cl)cc1	0.970925
NC1CC(c2cc(NCCn3cc(Cl)cn3)ncn2)C1	0.982315
Cc1cccc(C(=O)N2CC(C)C(N)C2)c1	0.923586
Cc1ccc(C2(CN(C)Cc3nncn3C(C)C)CCNCC2)nc1	0.998535
Cc1ncc(C(=O)N(C)CCC(F)(F)F)c(Cl)c1Cl	0.995816
Cc1nc(C(NC(=O)C2CCNCC2)c2ccc(Cl)cc2)no1	0.98842
CCCCCn1c(SCc2nc(-c3cccs3)no2)nc2cc3c(cc2c1=O)OCO3	0.57196
CN(C)c1nc(CNC(=O)c2cc3ccccc3s2)nc(N2CCCC2)n1	0.520283
CC1CN(CCCNS(=O)(=O)c2cn3c(n2)CCCC3)CCCO1	0.500315
C/C=C(\C)CN1CCN(C(C)=O)CC1	0.952873
O=C(NC[C@H]1[C@H]2CN(CCOc3ccccc3)C[C@]23CC[C@H]1O3)c1cscn1	0.976732
O=C1CC[C@@H](C(=O)N2CCN(C3Cc4ccccc4C3)CC2)N1	0.916849
CNc1nc(C)cc(C(=O)NC2(C(N)=O)CC2)n1	0.501503
COc1cc(NC(=O)COC(=O)c2ccc(C)cc2O)c(C)cc1[N+](=O)[O-]	0.795643
Cc1ncnc(N2CCN(c3c(C)c(C)nc4ncnn34)CC2)c1C	0.92449
Cc1nn(-c2ccccn2)c2nc(C3CC3)cc(C(=O)N3CCCCC3c3cn[nH]c3)c12	0.995333
CC(C)NCCc1cn(C)c2cc(Cl)ccc12	0.964586
O=C(Nc1cccc(Cl)c1Cl)c1cc(-c2ccco2)nc2ccccc12	0.990287
O=C(c1cnccn1)N(Cc1ccco1)C1CC1	0.937344
Cc1cc(N2CCCC2c2cn3cccc3c(N(C)C)n2)ncn1	0.965705
CC(C)N1CCN(CCC(=O)N2CCN(c3nccnc3C#N)CC2C)CC1	0.746224
CCOc1ccc2nc(C(=O)NCc3nc(-c4cccn4C)no3)cc(OCC)c2c1	0.962862
CN(C)c1cccc(C(=O)N2CCCN(Cc3cccnc3)CC2)c1	0.995499
CCCn1nc(C)c2c1NC(=O)CC2c1ccc(OCc2ccccn2)cc1	0.802633
O=C(Nc1ccc(Cl)cc1Cl)N1CCN(Cc2ccc(Cl)s2)CC1	0.991163
Cc1cccc(-c2noc(CCCC(=O)N3CCN(c4nc[nH]n4)CC3)n2)c1	0.96652
CC1=C(C#N)c2nc(N)c(C#N)c(C)c2C1=Cc1ccc(OCC(=O)Nc2ccccc2)c(Cl)c1	0.553456
CC(N)C(C)C(=O)NCCCc1nc2ccccc2[nH]1	0.767311
CN(C(=O)c1ccc(N2CCCCCC2)c([N+](=O)[O-])c1)C1(c2ccccc2Cl)CCCCC1=O	0.8558
NC(=O)CC1(O)CCCN(CCc2c(F)cccc2Cl)C1	0.984
CCCN1CN=C(/N=c2/nc(C)c3cc(C)ccc3[nH]2)NC1	0.938818
CCCCOc1ccc(/C(O)=C2\C(=O)C(=O)N(CCCOC)C2c2cccc([N+](=O)[O-])c2)cc1C	0.994547
CN(CCc1ccccn1)c1ncccc1CNC(=O)C1CCCO1	0.94341
N#CCCC1(CCc2cn(-c3cc(N)ccn3)nn2)OCCO1	0.774396
CC(C)(C)c1ccc(C(=O)Nc2ccc(C(=O)NNC(=O)CCCCCCCC(=O)NNC(=O)c3ccc(NC(=O)c4ccc(C(C)(C)C)cc4)cc3)cc2)cc1	0.604957
C=CC(=O)N(C)c1ccc(C(=O)NCC2CC(CC)=NO2)cc1	0.905105
CC(CN1CCCCC1)NCc1cncs1	0.98517
CCOC(=O)Cc1csc(NC(=O)c2ccc(SC)cc2OC)n1	0.734442
COc1cc(/C=N/NC(=O)c2n[nH]c3c2CCc2ccccc2-3)cc(OC)c1OC	0.978244
Cc1ccc(NC(=O)N(Cc2nc(C)cn2C)CC(C)(C)C2CCOC2)c(C)c1	0.744256
C=C(C(=O)OC)C(O)c1cccnc1	0.755212
c1ccc(-n2nnnc2NCCC2CCCO2)cc1	0.880894
O=C1OCC2(CCN(C(=O)C3CCCN(Cc4ccco4)C3)CC2)O1	0.940979
COc1cc(-c2nccn2C2COc3c(cccc3OC)C2)ccn1	0.822295
O=C(CN1CCCC1=O)N1CCC(c2ccc3cc(Cl)cnc3n2)CC1	0.915142
CCC(=O)N1CCN(c2nc3c(s2)CC(C(=O)NCc2ccccn2)CC3)CC1	0.947405
O=C(CSc1nnc(-c2ccncc2)n1Cc1ccccc1)c1ccc2c(c1)OCCO2	0.822464
O=[N+]([O-])c1c(NCCOc2ccccc2)nc2sccn12	0.689084
COC(=O)c1ccsc1N1CCC(NC(=O)C2CCNCC2)C1=O	0.787406
O=C(CN1CCOCC1)NN=Cc1ccc(F)cc1	0.642504
CCCCC(CC)CN1C(=O)/C(=C/c2cn(-c3ccccc3)nc2-c2ccc(OC(C)C)cc2)SC1=S	0.584974
COC(=O)C1(Oc2ccccc2[N+](=O)[O-])OCC(OC(C)=O)C(OC(C)=O)C1OC(C)=O	0.878844
Cc1nc(C2(NC(=O)c3nc(Cl)c(Cl)c(Cl)c3Cl)CCCCC2)no1	0.539277
CN(C)C[C@@H]1OCCN(C(=O)c2cccc3c2COC3)[C@H]1c1cnn(C)c1	0.752939
O=C1c2cccc3c(N4CCOCC4)ccc(c23)C(=O)N1/N=C/c1cccc([N+](=O)[O-])c1	0.931827
CN1CCC(C)(CNc2ncnc3sc(C(F)(F)F)nc23)CC1	0.918731
CCOC(=O)c1cnc2c(C)c(Cl)ccc2c1Nc1cccc([N+](=O)[O-])c1	0.995099
O=c1c2nc(-c3ccccc3)oc2nc2[nH]c(-c3ccccc3)nn12	0.715668
Cc1cccc(CNc2ccc(N3CCCC3=O)cn2)c1	0.961795
COc1cccc2c1OCC(CN1CCCCC1CCn1cccn1)=C2	0.998551
COc1ccccc1Oc1nc2ccccn2c(=O)c1C=C(C#N)S(=O)(=O)c1ccc(Cl)cc1	0.930098
Cc1ccc2c(C)c(C(=O)N3CCC(Nc4ccccn4)CC3)oc2c1	0.97301
CCCCn1c(=O)[nH]c(=O)c2c1nc(COC(=O)c1ccccc1NCCO)n2C	0.975483
CCOc1ccc(CNC(=O)c2ncn3c2COC(c2cc(C)ccc2C)C3)cc1	0.521513
Cc1ccc(C(=O)N2CCC3CCC(C2)N3)c(Br)c1	0.971689
C[C@@H](Nc1ncnc2cc(Br)ccc12)C(=O)N(C)C	0.932669
O=C(N1CCCC(c2nnc3ccccn23)C1)N1CCc2ccccc21	0.921075
CCc1cc(NCCCc2nnc(N)s2)n2nccc2n1	0.991231
CCOC(=O)c1sc2c(c1NC(C)=O)CCC(C=NC(C)(C)C)=C2Sc1ccccc1	0.743207
Cc1nc(O)c(C=Nc2ccc(Cl)cc2)c(O)n1	0.999073
Cc1ccc2nc(CNc3nc(C4CCC4)no3)cn2c1	0.997262
Cc1nn(-c2ccccc2)c(N)c(-c2nc3ccccc3[nH]2)c1=O	0.986485
CCCOc1ccc(CN2CCC(NC(=O)c3ccnn3C)C2)cn1	0.992182
Cc1ccc2oc(-c3ccc(C)c(/N=C/c4cc(Cl)cc(Br)c4O)c3)nc2c1	0.996341
CCOc1nc(-c2ccccc2)cc(-c2ccc(Br)cc2)n1	0.984333
O=S(=O)(Nc1ccccc1)c1ccc(NC(=S)NCc2ccco2)cc1	0.940179
CCN(CC)Cc1cnc2c(C(=O)Nc3ccc(OC)cc3)cnn2c1	0.752786
N#Cc1ccc(NC(=O)C2CCN(C(=O)c3cc4n(n3)CC(c3ccccc3Cl)OC4)CC2)cc1	0.875646
CC(CC(=O)N1CCC(C2Nc3ccccc3S(=O)(=O)N2)CC1)n1cncn1	0.622175
CC(/C=C/c1ccco1)=N/NC(=O)C[n+]1ccccc1	0.990787
Cc1cc(C(=O)N(C)Cc2noc(O)n2)c2c(C)noc2n1	0.972855
CC1(CN)CCN(C(=O)c2cccc(S(=O)(=O)N3CCc4ccccc43)c2)C1	0.900313
CCOC(=O)CN1CCN(Cc2c(Cl)cccc2Cl)CC1	0.993062
O=C(NCCn1ccc(C2CC2)n1)c1[nH]nc2c1CCCC2	0.79581
COc1ncc(NC(=O)CCc2ccccc2)cn1	0.989599
CNC(=O)c1ccc(-c2ccc(C3CCN(C(=O)Cn4nc(C)ccc4=O)CC3)nc2)cn1	0.991373
CC1(C)CN=C(N2CCNCC2)S1	0.794123
CC(=O)NCC1CCN(c2cc(C(C)C)nc3ccnn23)CC1	0.917512
Cc1nc2ccccc2nc1N1CCN(CCOc2ccccc2Cl)CC1	0.999141
CN(CCC1CCCNC1)Cc1cccc(Br)c1	0.993907
Fc1ccc(C(NC2CCCCCCC2)c2ncon2)cc1F	0.800711
CN1C(=O)SC(Nc2cccc3ccccc23)C1=O	0.555146
O=C(N/N=C/C=C/c1cccc([N+](=O)[O-])c1)c1cc2ccccc2cc1O	0.924043
COC(=O)C1(C)CN(Cc2ccc(N3CCCC3)nc2)C1	0.96199
CCc1ccc(C2C(c3ccc(OC)cc3)=C(O)C(=O)N2Cc2ccc(C)cc2)cc1	0.701989
COc1cc(C(=O)NC(C)c2sc(C)nc2C)c([N+](=O)[O-])cc1OC	0.951243
O=C(CCCOCCc1ccccc1)N1CCCNCC1	0.896773
COc1ccc(C2Cn3nc(C(=O)N4CCC(C(=O)Nc5ccc(OC)cc5C)CC4)cc3CO2)cc1	0.973853
CC(C)[C@@H]1NC(=O)c2csc(n2)[C@H](Cc2ccccc2)NC(=O)CN(C(=O)CCN2CCCC2=O)CCCNC(=O)c2csc1n2	0.981962
CC(=O)Nc1ccc(NC(=O)CSc2nc3cc(Cl)cnc3[nH]2)cc1	0.63309
CC(=O)Nc1ccc(NC(=O)c2cc(C3CC3)nc3c2c(C2CC2)nn3-c2ccccc2)cc1	0.994453
CC(c1cn(-c2ccccc2)nn1)N1CC[C@H](C(=O)O)[C@H](C)C1	0.945227
Cc1nc(-c2cccs2)c(CC(=O)Nc2ccc(N3CCN(C)CC3)cc2)s1	0.948855
O=C(Nc1ccc(Cl)cc1)N1CCCN(C(=O)c2nn[nH]c2-c2ccccc2)CC1	0.894114
CCCCCCCCCn1c(SCCCc2ccccc2)nc2c1c(=O)[nH]c(=O)n2C	0.926155
Cc1cccc(-c2nc(CN3CCN(C(=O)c4ccccc4C)CC3)no2)c1	0.957337
O=C(CCc1cccnc1)Nc1ccc2c(c1)Cc1ccccc1-2	0.983214
CCCCCCCCCCCCCCCCCCN(CCCCCCCCCCCCCCCCCC)CCCCCCCCCCCCCCCCCC	0.820547
Cc1ccc2cc(C(=O)NC3CC4CN(C(=O)c5ccn6nccc6c5)CC4C3)ccc2c1	0.543564
Cc1ccc(-c2ccc(C=C(C#N)c3nc4ccccc4c(=O)[nH]3)o2)c([N+](=O)[O-])c1	0.622437
COc1ccc(C2Cn3nnc(C(=O)N4CCCC(C(=O)NCCCN5CCN(C)CC5)C4)c3CO2)cc1	0.979526
CC1CN(Cc2cnc3ccccn23)CC1O	0.970303
COc1cc(C(=O)N2CC(N)CC2C)ccc1F	0.887628
COc1c(Cl)cc(/C=C(\C#N)c2cccc(F)c2)cc1Cl	0.98229
Cc1ccc2cccc(C(=O)NCCOCC3CC3)c2n1	0.514988
O=C1NC(=S)N(c2cccc(Cl)c2Cl)C(=O)C1=Cc1ccc(O)cc1	0.89647
O=C(C=Cc1cccs1)N1CCCCC1	0.879126
CCCC[NH+](CC#Cc1ccc(C#CC[NH+](CCCC)CCCC)cc1)CCCC	0.986523
Cc1cc(C)c(CNC(=O)NCCN(C)Cc2ccccc2)c(=O)[nH]1	0.993985
O=C(Nc1cc(-c2ccccc2)ns1)c1cc(F)ccc1F	0.53528
O=C1CCCc2occ(C(=O)N3CC(=O)N(CC4CCOCC4)CC(OCc4cccnc4)C3)c21	0.942601
O=C(c1cc(Cl)cc(Cl)c1)c1cccc(CN2CCCCC2)c1	0.977088
CCc1ncnc(N2CCC([C@@H](C)NC(=O)c3ccc(F)c(C)c3)CC2)c1F	0.921852
CC(NS(=O)(=O)CC1CCCCC1)C1CCCNC1	0.790332
COCCCCNCc1c(F)cccc1F	0.895635
Cc1cccc(OCCc2noc(C3CN(C(=O)c4cn(C)cn4)C3)n2)c1	0.648441
CCOc1cc(=O)c(C(=O)NCC2CC2)nn1-c1ccc(C)cc1	0.731362
O=C(CNC(=O)c1cccc([N+](=O)[O-])c1)NCc1coc(-c2cccs2)n1	0.745214
CC1CC(NC(=S)Nc2ccc(I)cc2F)CC(C)(C)C1	0.925986
C(=Cc1csnn1)c1ccccc1	0.894738
Cn1c(SCC(=O)N2CCCC2=O)nc2ccccc21	0.889893
COc1cc(OC)c(OC)cc1CNCc1cccnc1O	0.998666
Oc1nc(O)c2ncc(Br)cc2n1	0.976286
CC(=O)c1ccccc1NC(=S)Nc1ccc(Cl)cc1	0.990296
Cc1nc(C(=O)N2CCN(c3ccnc4ccccc34)CC2)c(C)o1	0.994976
Cc1ccccc1Cn1c(N2CCC(C(=O)NCc3ccccc3Cl)CC2)nc2ccccc21	0.700729
C=CCn1c(=O)/c(=C\C=C2/C=CN(CC)c3ccccc32)s/c1=C/c1sc(-c2ccccc2)c(-c2ccccc2)[n+]1CC	0.973495
CN(C)C(=O)Cn1c(C2CCOCC2)cc2cccnc21	0.955675
COc1cccc(NC(=O)CCN2CCC(C(N)=O)CC2)c1	0.923632
COc1ccccc1NC(=O)C(C)N1CCCC(C)C1	0.733935
COc1cccc(C(O)=C2C(=O)C(=O)N(c3nc4ccc(C)cc4s3)C2c2ccccc2)c1	0.872679
CC(C)NC1(CO)CCN(C(=O)c2cnn(-c3ccc(Cl)cc3)n2)CC1	0.70436
Cc1cc(/C=C2/C(=O)NC(=S)N(c3cccc(C(F)(F)F)c3)C2=O)c(C)n1-c1ccc(F)cc1	0.966396
CC(NC(=O)CC(N)c1ccccc1)c1noc(Cc2ccccc2)n1	0.953093
Cc1cccc(N2CCN(C(=O)C3(C)CCN(C)CC3)CC2)c1	0.989385
N=C1C(=Cc2cccc3ccccc23)C(=O)N=C2SC(CC(=O)N3CCCC3)=NN12	0.855282
Cc1ccc(C(=O)N2CC[C@@H](N)C2)cc1S(=O)(=O)N1CCCCC1	0.851676
O=c1/c(=C\c2cccc(Oc3ccc(C(F)(F)F)cc3[N+](=O)[O-])c2)sc2nc3ccccc3n12	0.989658
O=C(c1ccc2c(c1)CCNC2)N1CCN(c2ccccc2F)CC1	0.991866
C/C(=N/NC(=O)c1nn(Cc2ccc(Br)cc2)cc1[N+](=O)[O-])c1ccc2ccccc2c1	0.913139
COc1cccc(-n2cc(C(=O)N3C[C@@H]4C[C@H]3CN4Cc3ccccc3)nn2)c1	0.957317
CCN(Cc1ccccc1)Cc1c(O)ccc2c(=O)c(Oc3cc(C)ccc3C)c(C(F)(F)F)oc12	0.94703
O=C1C(=O)N(CCCN2CCOCC2)C(c2ccccn2)/C1=C(\O)c1ccco1	0.996978
COc1cc(C=CC23NC(=O)CN2c2ccc(C)cc2C3(C)C)ccc1OC(C)C	0.813266
CCn1nc(C)c(CN(CCOC)Cc2ccc(-n3cccn3)cc2)c1C	0.988274
CCn1cncc1CNC(=O)c1cc(CN(C)Cc2ccccc2)on1	0.929023
Cc1cc(C(=O)N2CCn3nc(CCC(=O)NC4CC4)cc3C2)nc(C)n1	0.981396
Cc1cccn2c(CC(=O)N3CCCC3c3nncn3CC(C)C)cnc12	0.673267
CN(CC(=O)NCc1csc(N(C)C)n1)Cc1cccnc1	0.989074
CCOc1cccc2c1OC(c1ccco1)N1N=C(c3ccc(C)c(C)c3)CC21	0.978895
Cc1cccc2c1OCCCC2NCc1nnc2n1CCCCC2	0.997223
CN(C)c1ccc(C=NNC(=O)c2cc([N+](=O)[O-])cc([N+](=O)[O-])c2O)cc1	0.94981
Cn1c(C(=O)NCCC2CCOC2)cc2ccc(Cl)cc21	0.85277
Cc1ccc2[nH]c(CN(Cc3nccn3C)C3CC3)c(C)c2c1	0.996834
CC1OCCC1(C)NCc1ncsc1Br	0.828743
Cc1cc(C)c(S(=O)(=O)N2CCC(C(=O)NC3CCCNC3)CC2)c(C)c1	0.943429
COc1cc2c(cc1CN1Cc3ccccc3C(O)C1)OCCCO2	0.971668
CCOC(=O)C(=Cc1ccc(NC)c([N+](=O)[O-])c1)c1nccn1C	0.973903
Cc1nnc(Nc2ccc(N3CC4CCC3C4)cc2)nc1C	0.78452
Cc1occc1C(=O)N(C)C(Cc1ccccc1F)C1CCN(Cc2ccccc2)CC1	0.992262
Cn1cc(C(=O)CC2CCCN2C(=O)Cc2csc(N3CCCC3=O)n2)cn1	0.755547
Cc1noc(C)c1CSCC(=O)N(c1ccccn1)C1CCCC1	0.963583
CO[C@@]12CC[C@@H](O)C[C@@H]1N(Cc1ccc3cc(F)ccc3n1)CC2	0.985181
CC(=O)Nc1ccc(S(=O)(=O)N2CCN(Cc3nc4ccccc4o3)CC2)cc1	0.971045
COc1ccc(OC)c(-c2ccc(O)c(CN(C)C(C)c3nccs3)c2)c1	0.98649
COc1ccc(-n2c(C)nc3ccc(NC(=O)COc4ccc(F)cc4)cc3c2=O)cc1	0.774885
CCc1nc2cc(NC(=O)CNCC3CC3)ccc2o1	0.978075
COc1ccc(-c2noc(-c3ccc(F)cc3Cl)n2)cc1OC	0.956743
Cc1cc(C(=O)N2CCC(Oc3cccc(F)n3)C2)n(C)n1	0.975171
Cc1ccc(N(CCC#N)C(=O)COC(=O)c2cc(C)oc2C)cc1	0.820654
CC(NCC(=O)Nc1ccnn1C(C)C)C(C)n1cccn1	0.725062
CN1C(=O)C(=CNNC(=O)c2cc3ccccc3cc2O)c2ccccc21	0.545808
CC1CCN(CCCNC(=O)Nc2ccc(Cl)cc2)CC1	0.990879
Cc1nc([C@H]2CCCN2C(=O)Cc2ccncc2Cl)n[nH]1	0.968675
CCn1nccc1C(=O)N1CCCC(c2nc(C)ncc2CO)C1	0.98969
Cc1cnc(NC2CCCN(c3ccccc3F)C2)nc1C	0.984715
COc1cnc(OC2CCCN(c3ncc(Br)cn3)C2)nc1	0.688062
CNCC(C)C(=O)N1CCN(c2ccccc2O)CC1	0.971847
COc1ccc(NS(=O)(=O)c2ccc(NC(=O)Cc3cccs3)cc2)cc1	0.995581
Cc1ncccc1CNC1CS(=O)(=O)c2ccccc21	0.793897
COCCNCC(=O)Nc1cccc(CSC2CCOCC2)c1	0.518227
COc1ccc(OC)c(C2Cn3cnc(C(=O)N4CCN(c5ccccc5Cl)CC4)c3CO2)c1	0.783038
CCNS(=O)(=O)c1ccc2c(c1)N(C(=O)C(C)CNC)CC2	0.856506
O=C(CN1CCOCC1)N/N=C/c1ccccc1O	0.889522
COc1cc(C(CC(=O)NCC(C)C)c2cn(Cc3ccc(C)cc3)c3ccccc23)ccc1OCc1ccccc1	0.807888
CC1(Cc2ccc3c(c2)OCO3)CCCN(C(=O)c2ccc3ncsc3c2)C1	0.947107
COc1ccc(-c2noc(-c3cn(-c4ccc(C)c(C)c4)c(=O)c4ccccc34)n2)cc1OC	0.75381
CCCCn1nc(C(=O)OCc2nc(N)nc(N(C)C)n2)c2ccccc2c1=O	0.820169
COCCCn1nccc1[C@H]1OCC[C@@H]1C(=O)Nc1ccc(N2CCCC2)nc1C	0.908402
O=C(c1ccccc1)c1ccc(NC(=O)c2cnccc2Cl)cc1	0.991034
O=C(Nc1ccccc1)N1C[C@@H]2C[C@H](C1)c1ccc(-c3cc4ccccc4s3)c(=O)n1C2	0.922452
Cc1ncn(C)c1C(=O)NCC1CCCN(C2CCCC2)C1	0.856839
Cc1ccnc(NC2CCN(c3ccncc3)CC2)c1C#N	0.656428
CC(C)Nc1ncccc1C(=O)N1CCc2c(F)ccc(F)c2C1	0.954895
CC(Cc1ccsc1)N(C)CCn1cncn1	0.909099
Clc1ccccc1C1N=C(c2ccccc2)N=C(c2ccccc2)N1	0.762351
COc1ccc(C2C(=C(O)c3ccccc3)C(=O)C(=O)N2CCCN(C)C)c(OC)c1	0.996081
COc1c(C)cnc(CNC(=O)C2CCCN2c2ncnc3ccccc23)c1C	0.71422
CON=Cc1ccc(N2CCN(C)CC2)c([N+](=O)[O-])c1	0.973014
Cc1cccc(CN2CCCC(c3nn(C)cc3-c3ccnc(N4CCCC4)n3)C2)c1	0.8745
C#CCCOc1cc(-c2ccc(C)s2)cc2c1OCCN(C(=O)c1ccccc1OC)C2	0.964264
Cc1cccc(COC2CCOC3(C2)CN(C2CCC2)C3)n1	0.960453
O=C1NC(=O)N(Cc2ccccc2)C(=O)C1=Cc1cccs1	0.923943
O=[N+]([O-])c1c(N2CC(NC3CCOCC3)C2)ccc2ncccc12	0.963489
Clc1ccc2oc(N3CCC(N4CCOCC4)CC3)nc2c1	0.988451
CC[C@@H]1CC[C@H](CNc2nccc(-c3ccc(OC)cc3)n2)O1	0.793251
CNC[C@@H]1C[C@H](F)CN1C(=O)c1cccc(Cl)c1Cl	0.88034
CCOc1ccc(C(=O)/C(=N/Nc2ccccc2)c2nc3ccccc3nc2O)cc1	0.989189
COC(=O)Nc1ccc(CN(Cc2ccncc2)C(C)C)cc1	0.984198
CC(Sc1ccccn1)C(=O)NCC1CN2CCN1CC2	0.987665
Cc1ccnc(N2CCN(CCCO)CC2)c1[N+](=O)[O-]	0.934429
CON1CCC(NC(=O)[C@@H]2CCC[C@H](Nc3ccc(C)cn3)C2)CC1	0.996712
O=C1C(=Cc2ccc(-c3cccc(C(F)(F)F)c3)o2)SC(=S)N1c1ccccc1	0.98379
COCCn1c(NN=Cc2c(C)nn(C)c2F)nc(=O)c2c(C)cc(C)nc21	0.804819
C=CCc1cc(/C=N/NC(=O)COc2cccc3cccnc23)cc(OCC)c1OCc1ccc(Cl)cc1	0.997167
CN(Cc1ccccc1)Cc1cc(C(=O)N2CC[C@@H](O)C2)no1	0.613113
COCCNCCNC(=O)CCOc1ccc(C)cc1C	0.99491
Cc1cc(Nc2ncccn2)cc(C2CCCN(c3ncccn3)C2)n1	0.981457
COc1cc(OC)c2[nH]c(C(=O)Nc3ccc(F)c(Cl)c3)cc2c1	0.977792
CC(c1ccc(Cl)cc1Cl)N1CCCC(CNC(=O)C2CCCN2)C1	0.967925
CC(=NNc1nc2ccccc2s1)c1cccs1	0.998788
COC(=O)[C@@H]1C[C@H](O)CN1Cc1cccc2cccnc12	0.619275
CCN(CC)S(=O)(=O)c1cc(C(=O)NCC(C)(C)N)ccc1C	0.509914
Cc1ccc(CN2CCC(N(C)Cc3cccnc3)CC2C(=O)O)o1	0.933212
COC(=O)C1=CC=CCCOC/C(O)=C\1C(=O)OC	0.536782
O=C(CCSc1ccccc1)Nc1nc2ccc(Br)cc2s1	0.69335
CCn1cnc2cc(NS(=O)(=O)c3ccc4c(c3)CCCN4C(C)=O)ccc21	0.534269
CNCC1CCCN1C(=O)Cc1cccc([N+](=O)[O-])c1	0.986246
NCCc1nc(C(=O)NCC2(c3ccc4c(c3)OCCO4)CCCC2)cs1	0.969019
Nc1c(C(=O)C23CC4CC(CC(C4)C2)C3)sc2nc3c(c(-c4ccc(Br)cc4)c12)CCCC3	0.921716
CCOC(=O)C1=C(C)NC2=C(C(=O)CC(C)(C)C2)C1c1ccc([N+](=O)[O-])cc1	0.854271
CCc1c(C)nc(C)nc1N1CCNCC1	0.993979
O=C(c1cnccn1)N1CC2(COC(Cc3ccccc3)C2)C1	0.865421
CC(=O)Nc1ccc(N2C(=O)C(=O)C(=C(O)c3ccccc3)C2c2ccccc2F)cc1	0.774817
NC(=O)c1ccc(NC(=O)COC(=O)C=Cc2c(Cl)nc3sccn23)cc1	0.926679
CCC1(CC)CCC(NC2CCc3nccn3C2)CC1	0.550825
O=C(O)CC1CCC2(CC1)CCN(Cc1ccc(O)nc1)CC2	0.996121
Cc1ccc(-n2nc(C)c3sc(N4CCCN(C(=O)c5cc6ccccc6o5)CC4)nc32)cc1	0.976845
COc1cccc(N2C(=O)NC(=O)/C(=C/c3cc(Br)c(O)c(OC)c3)C2=O)c1	0.979289
Clc1cccc(CN2CCN(c3nc4ccccc4c4nnc(C5CCCCC5)n34)CC2)c1	0.995039
CCCc1onc(NCc2n[nH]c3ccccc23)c1C	0.956469
Cc1cc(C=C2C(=O)N(c3ccc(I)cc3)C(=O)N=C2O)c(C)n1-c1ccc(F)cc1	0.955489
CC(C)c1noc(CCC(=O)NCC2CCOC2)n1	0.525069
O=C(c1ccc(F)cc1F)N1CCN(c2cc(-c3cccs3)n[nH]2)CC1	0.799928
COc1cc(C(=O)NC2CCCC2CN)cc(NS(C)(=O)=O)c1OC	0.84403
O[C@@H]1C[C@@H]2C[C@H]1CN2c1nc(N2CCOCC2)nc(N2C[C@@H]3C[C@H]2C[C@H]3O)n1	0.753061
COc1ccc(C(C)=NNC(=O)c2ccc(Cl)cc2)cc1	0.997168
CCc1ccc(C(=O)CSc2nnnn2-c2cc(C)ccc2OC)cc1	0.737041
Cc1cc(C)c(NC(=O)c2ccc(C(C)(C)C)c(Br)c2)c(C)c1	0.874474
Cc1nnc(-c2cc(CCC(C)C)n(-c3cccc(C(=O)N4CC(C)CC(C)C4)c3)n2)o1	0.803614
Cn1nnc(-c2ccc(C(=O)N[C@H]3CO[C@H]4[C@@H]3OC[C@@H]4O)cc2)n1	0.701791
Fc1ccc(Cc2noc(-c3cc(F)ccc3Cl)n2)cc1	0.71751
O=C(Cn1nnnc1CN1CCOCC1)NCCCn1ccc2ccccc21	0.935404
COc1cccc(-c2cncc(N(C)CC3CCNCC3)n2)c1OC	0.994021
CNc1cc(CCNC(=O)c2ccc(OC)nc2)nc(-c2ccncc2)n1	0.997491
CC1(C)CCc2c(C(=O)OCc3cc(=O)[nH]c(=O)[nH]3)csc2C1	0.530642
CCCC(=O)NC[C@H]1[C@H]2C[C@H](CN(c3ccc(C)c(C)n3)C2)[C@@H]2CCCC(=O)N21	0.84869
Cc1nccc(NC(=O)c2cccc(S(=O)(=O)N3CCC(c4ncc[nH]4)CC3)c2)n1	0.996548
Cn1nnnc1COc1ccc(CC(=O)N2CCN(Cc3ccccc3)CC2)cc1	0.994149
Cn1nc(O)cc1C(=O)N1CCC(NC2CCC2)CC1	0.644759
CCc1cccc(N2C(=O)CSC2c2cccc(NC(=O)C(C)(C)CCl)c2)c1	0.525948
O=C1NC(=S)NC(=O)C1=CNc1ccc(I)cc1	0.998795
COc1ccc(NC(=O)C(C)C2CCN(C(=O)Nc3ccccc3)CC2)cc1	0.879944
Cc1nc2ccc(N=Cc3cccc(Br)c3)cc2[nH]1	0.995585
Cn1cc(N2CCCC(N)C2)cn1	0.690684
CCn1ccnc1CNC(=O)C[C@H]1CC[C@@H](CNC(=O)c2cnc[nH]2)N1CC1CC1	0.653534
CC1CCc2nc(CNC3(CO)CCCC3)sc2C1	0.745841
CCc1cc(C(=O)Nc2ccc3c(c2)nc(CC)n3CC)on1	0.991127
COc1cccc(C(=O)NCC2c3cc(OC)c(OC)cc3CCN2Cc2cccc(F)c2)c1	0.993694
O=c1c2cc(F)c(N3CCNCC3)cc2nc2n1Cc1cc3ccccc3cc1-2	0.852902
Cc1ccc(N=Nc2cc(C)ccc2NC(=O)c2ccccc2NS(=O)(=O)c2ccc(Br)cc2)cc1	0.835103
CN(C)C[C@@H]1[C@H]2CN(C(=O)c3ccc(F)c(O)c3)C[C@@H]12	0.631768
CC(C)Cc1ncc2c(n1)CN(C(=O)Nc1ccc3c(cnn3C)c1)C2	0.573097
COCC1(C(=O)Nc2ccc3c(c2)CCC(=O)N3)CCNCC1	0.996667
Cc1csc(CN2CCc3ccc(F)c(C(=O)O)c3C2)n1	0.72674
CCc1ncc(Cl)c(C(=O)Nc2cscc2Br)n1	0.950679
CCCN(CCC)S(=O)(=O)c1ccc(C(=O)N2CCCCC2C(C)N)cc1	0.948045
COC(=O)c1ccc(CN2CCN(C3CCN(C(C)C)CC3)C(CCO)C2)cc1	0.984854
CCC(CC)(CN)NC(=O)Cn1c2ccccc2c(=O)c2ccccc21	0.924002
Cc1cccc(C(=O)OCc2cc3ccc(C)cc3nc2O)c1	0.990091
COc1ccccc1C(CNCc1cn(C)nc1C(C)C)N(C)C	0.955668
FC(F)(F)c1cnc(CN2CCN(C(=S)Nc3ccc(Cl)cc3)CC2)c(Cl)c1	0.863448
C=CCN1CC2(CCN(c3cc(OC)ncn3)CC2)OCC1=O	0.88901
O=C(Nc1ccc(Br)cc1F)c1nnn2c1COC(c1ccccc1Cl)C2	0.565324
Cc1nc([NH2+]CCO)c2oc3ccccc3c2n1	0.967048
O=C1N[C@H]2C[C@@H](C(=O)NC[C@H]3O[C@H](CCOc4ccccc41)CC[C@@H]3O)N(Cc1ccc(Cl)c(F)c1)C2	0.596555
Cc1cc(C)c2c(c1)C(NC1CC1)CCCO2	0.995016
COc1ccc(C(=O)Nc2ccc3c(c2)CC(C(=O)NCc2ccccc2C)CO3)cc1	0.513529
COc1ccc(C(=O)NCCc2cc3c(OC)ccc(OC)c3[nH]c2=O)c(OC)c1	0.712821
Cc1cccn2cc(CCNC(=O)c3ccc4c(n3)CCCC4)nc12	0.998716
COc1ccc(C=C2N=C(c3ccc(C)cc3)OC2=O)cc1OCc1ccccc1	0.999129
Cc1c(Cl)cccc1NC(=O)CN1CCN(Cc2ccccn2)CC1	0.979566
Cc1c(C(=O)N2CCN(c3cc(C4CC4)n[nH]3)CC2)sc2ccc(F)cc12	0.856468
CCn1cnc2c1CCN(C(=O)c1cc(OC)c(OC)c(OC)c1)C2	0.985141
COC(=O)C1Cc2c([nH]c3ccccc23)CN1	0.991566
CC1CCCCN1C(=O)c1cc(S(=O)(=O)N2CCCC2)cn1C	0.613727
CNCCC1CCN(C(=O)c2sc(C)cc2OC)CC1	0.766803
CCc1ccc(C(c2nnnn2CC)N2CC3(F)CC2C3)s1	0.865195
CCC1CN(C(=O)c2cc(COc3ccc(OC)cc3Cl)[nH]n2)CCN1	0.954795
O=S(=O)(CCC(F)(F)F)Cc1ncccc1Cl	0.589924
CCOC(=O)CN1C(c2ccccc2OC)Nc2ccc(Br)cc2C1c1ccccc1	0.791058
COCCNCCNC(=O)c1cnc2[nH]c(=O)[nH]c(=O)c2c1	0.994666
Cc1cc(C(=O)NNC(=O)Cc2cccnc2)cc(C)c1OCc1cccnc1	0.995746
O=C(NCc1ccccn1)C1CCN(Cc2ccccc2-n2cccn2)CC1	0.968914
COCCN1CC(C(=O)NCCn2cc(-c3nc(C)no3)nn2)CC1=O	0.533434
CC(C)c1nnc(CNC(=O)C23CC(CN2C2CC2)C3)n1C	0.55027
Oc1ccc2c(c1CNc1nc3cnccn3n1)CCC2	0.578304
Cn1c(=O)oc2cc(NC(=O)C3CCNCC3)ccc21	0.987444
CCOC(=O)Nc1ccc(C(=O)Nc2nccs2)cc1	0.890134
CC(Nc1ncncc1Cl)C1CCCN(C2CCC2)C1	0.946367
O=C(c1cc(-c2ccncc2)[nH]n1)N1CCC[C@@H]2COC[C@@H]21	0.684638
Cc1cccc(-c2cc(NC(=O)c3ccccc3Cl)n(-c3ccccc3)n2)c1	0.86285
CCOc1ncccc1-c1cc(OC)nc(OC)n1	0.843306
O=c1cc(CN2CCCCC2)oc(CN2CCN(c3ccccc3)CC2)c1O	0.994128
c1ccc(N2CCOCC2)c(CNc2ccc3[nH]ncc3c2)c1	0.588972
Cc1nc(C(C)(C)C)sc1C(C)NC(C1CCC1)C1CCC1	0.988873
Cc1cc(-n2cncn2)ccc1C(=O)NCC(C)(C)C(=O)O	0.698747
Cc1ccc(C)c(Cn2nnc3c(O)nc(C4CCN(C(=O)c5ccccc5C)CC4)nc32)c1	0.957778
CC(=O)Nc1c[nH]nc1C1CCCN(C(=O)c2ccco2)C1	0.985699
Cn1c(CNc2cc(F)cc(Cl)c2)cc(=O)n(C)c1=O	0.639583
Sc1nnc(NCc2cccs2)s1	0.892061
CCSc1ccc(C(=O)NCCc2nnc[nH]2)cn1	0.993704
CN(Cc1cscn1)C(=O)CC1CCNCC1	0.976838
CCOc1ccc([N+](=O)[O-])cc1CNC1CCCc2c1cnn2CCO	0.953999
CC(C)c1nc(N2C[C@@H](c3ccccc3)[C@@H]3[C@H]2C2CCN3CC2)no1	0.984372
O=S(=O)(c1ccc(Cl)s1)N1CCCN(CC2CCCNC2)CC1	0.946156
C[n+]1c2ccccc2n2ccsc21	0.79194
O=C(Nc1ccc(-c2cn3ccccc3n2)cc1)C(c1ccccc1)C1CCCCC1	0.690866
CC(=O)N1N=C(c2c(C)nc3ccc(Cl)cc3c2-c2ccccc2)CC1c1ccc(Cl)cc1	0.97673
C/C(=N\O)c1cc([N+](=O)[O-])c2ccccc2c1O	0.747668
CN(C)CCOCc1nnn2c1CN(Cc1cccs1)CCC2	0.992431
Cc1nc2ccnn2c(C)c1C(=O)N1CC(C)C1C	0.741356
Cn1cc(C(=O)c2ccc(Cl)cc2Cl)cc1/C=C(\C#N)c1ccc(Cl)cc1	0.990984
CCN(CCn1cccn1)C(=O)c1cnc(N)s1	0.972535
Cc1cccc(-n2nnc(C(=O)NCC3CCCN3C(=O)C3CC4(CC4)CO3)c2C)c1	0.85796
Cc1cc(/C=C2\C(=O)NC(=S)N(c3ccccc3)C2=O)c(C)n1-c1ccc2ncccc2c1	0.996049
Cc1n[nH]c(=O)nc1N/N=C/c1cccc(OCc2ccc(Cl)cc2)c1	0.990523
Cc1ccc2[nH]ncc2c1C(=O)N1CCC(c2ncon2)C1	0.829788
CC(C)(C)C(=O)N1CCc2cc(-c3csc(-c4cccnc4)n3)ccc21	0.715775
CC(=O)NC(O)C(Cl)(Cl)C(Cl)c1ccccc1	0.9377
O=C(Cn1nnnc1CN1CCOCC1)N1CCN(c2ccccc2)C(=O)C1	0.86573
CC1CCCCC1NC(=O)c1cccc(N)n1	0.791521
COc1ccc(Br)cc1C1Cn2nc(C(=O)N3CCC(C(=O)N4CCN(c5ccc(C)cc5)CC4)CC3)cc2CO1	0.964283
COc1ccc2c(ccn2CCC(=O)NCC#N)c1	0.863769
CC1Oc2ccccc2C=C1/C=C1\Oc2cc(OC(=O)N(C)C)ccc2C1=O	0.860673
CCOC(=O)c1ccc(NC(=S)Nc2ccc(CC)cc2)cc1	0.984645
Cn1c(SCc2c(F)c(F)c(F)c(F)c2F)nc2scc(-c3ccc(F)cc3)c2c1=O	0.973146
CN(CC(=O)Nc1ccc(Oc2ccccc2)cc1)Cc1ccccc1N1CCOCC1	0.705144
CON=C(C(=O)NC1C(=O)N2C(C(=O)O)=C(Cn3ccc(=N)n3CCO)CSC12)c1csc(N)n1	0.92033
COc1ncccc1CN1C(=O)OC[C@@H]1C(C)C	0.991796
O=C(O)C1CCC2COCC2O1	0.662459
CN1CCN(c2ccc(-c3noc([C@@H]4CCCN4Cc4ccc(F)c(F)c4)n3)cn2)CC1	0.604479
C=CCC1(CNC2CCC(C(=O)O)CC2)CCCC1	0.654872
FC(F)(F)CSc1nc2ccccc2[nH]1	0.926431
CN(C)C1CC(NC(=O)CC2OCCO2)C12CCC2	0.875681
C=C(C)COc1ccccc1C=C1N=C(c2ccc(C)c([N+](=O)[O-])c2)OC1=O	0.997323
Cc1cc(NC(=O)c2ccc3sc(C)nc3c2)sn1	0.984342
Cc1ccc(NCCCNC(=O)c2csc(C(C)C)n2)nc1	0.992891
CCN(CC)CCN(C)C(=O)c1cc(-c2ccco2)[nH]n1	0.992457
O=C(Nc1ccc(Cn2cccn2)cc1)c1ccc(O)c([N+](=O)[O-])c1	0.973147
CC(C)N1CCCN(C(=O)c2cccn2C2CCNCC2)CC1	0.989164
COc1ccc(Cl)cc1C1Cn2nnc(C(=O)N3CCCC(C(=O)Nc4cc(Cl)ccc4F)C3)c2CO1	0.68646
Cc1nn(-c2ccccc2)c(C)c1CC(=O)NC1CCNC(C)C1	0.924908
COc1ccc(OC)c(S(=O)(=O)N2CCN(C(=O)[C@@H](N)C(C)(C)C)CC2)c1	0.824008
CCc1cc(CN(C)C2CCC3(CC2)CCN(C(=O)N(C)C)CC3)on1	0.995767
Cc1cnn(Cc2c(C(=O)NC3CCc4nnc(C)n4CC3)noc2C)c1	0.915559
CCOC(=O)Cc1c(C)nc2ncnn2c1N1CCN(Cc2ccc(F)cc2)CC1	0.954595
CC(C)(C)[C@@H]1OCC[C@H]1c1nc(-c2cn(CCO)c(=O)[nH]c2=O)no1	0.783411
COc1ccc(C=CC(=O)c2ccc3c(c2)NC(=O)CO3)cc1F	0.975046
CCc1noc(CC)c1C(=O)NC(Cc1c[nH]c2ccccc12)c1cc(N(C)C)nc(C)n1	0.962248
CCOc1ccc(C2C(C#N)=C(N)Oc3cc(C)[nH]c(=O)c32)cc1OC	0.768048
Cn1ccnc1CN1CCCCC1C(=O)Nc1ccc(Oc2ccccc2)nc1	0.85327
O=C1CC(NC2CCN(Cc3ccccc3)CC2)C(=O)N1c1ccc(Br)cc1	0.867035
CCc1ccc2c(CN(CC(C)O)c3ccccc3)cc(=O)oc2c1	0.905795
Cc1nnc(N2CCN(CCN3CCNC3=O)CC2)n1C	0.977059
CC1CCN(C(=O)C2CCCN(C(=O)c3ncn4c3COC(c3ccccc3Cl)C4)C2)CC1	0.961443
CCOc1ccccc1N1CCN(C(=O)c2c(C)c(-c3ccc(C)cc3)nc3ccccc23)CC1	0.988535
Nc1nnc(-c2nc3ccccc3s2)o1	0.939621
CCOC(=O)C1=C(N)Oc2[nH]c(=O)[nH]c(=O)c2C1c1cccc(Cl)c1	0.961659
CCOC(=O)c1cc2c(=O)n3ccccc3nc2n(CCOC)c1=NC(=O)c1ccc(Cl)cc1	0.992114
COCCN1CCN(C(=O)C(C)Oc2ccc3c4c(c(=O)oc3c2C)CCC4)CC1	0.95135
COc1cc2nc(N[C@@H]3CN(C(=O)OC(C)(C)C)C[C@H]3OC)nc(N)c2cc1OC	0.995129
CC(C)c1n[nH]c(NC(=O)c2nn(C)c3ccccc23)n1	0.897513
COc1ccc2c(C)cc(N3CCCC(NS(=O)(=O)C4CC4)C3)nc2c1	0.944616
Cc1cnc(NCc2ccc3c(c2)CCC(=O)N3C)nc1	0.843133
COc1ccc(NS(=O)(=O)c2cc(-c3nnc(C(=O)N4CCCCC4)o3)sc2C)cc1	0.971314
O=C(NCc1ccc(F)c(Cl)c1)c1ccncc1	0.898209
COc1ccccc1-c1nc(C(=O)Nc2cc(C)on2)cs1	0.929385
O=C(CCCc1nc2ccccc2s1)N1CCc2c(nc3cc(-c4ccccc4Cl)[nH]n3c2=O)C1	0.955835
COc1ccc(C)c2sc(N3CCC(c4nnc(C5CC5)o4)CC3)nc12	0.998868
CC1NCCCC1NC(=O)c1cc(Cl)ccc1F	0.958097
Cc1c(Cl)cccc1-n1c(C)cc(/C=C2\NC(=O)N=C2O)c1C	0.768404
Cn1ccnc1[C@@H]1CN(C(=O)c2cccc(Oc3cnccn3)c2)C[C@H]1N	0.991241
CN(CCCN(C)C(=O)c1cc2c(cn1)OCCC2)C(=O)c1cnn(CC2CCCCC2)c1	0.757444
COc1cccc(-c2nc(C3CCN(S(=O)(=O)c4cccc(OC)c4)CC3)no2)c1	0.927364
Cc1cccc(NC2CCN(C(=O)c3nc4ccccc4s3)CC2)c1	0.998592
Cn1cc(C(=O)N2CCC3(CC2)OCCCC3O)c2ccccc21	0.548594
CC1CN(c2ccc(C(=O)N3CCCc4cccc(F)c43)cn2)CC(C)O1	0.994589
Cc1nc(C)c2c(C)c(C(=O)NCCS(=O)c3ccccc3F)sc2n1	0.769427
CC(N)=C(C#N)c1csc(N)n1	0.655625
C[N+](C)(C)c1cnc(N)nc1	0.975081
Cn1ncc2c(N3CCC(Nc4ccccc4)CC3)ncnc21	0.905968
Cc1ccc2c(N)nc(N[N+](=O)[O-])nc2c1	0.913229
CCn1cc(CNC2CC3(CCOCC3)Oc3ccccc32)nn1	0.997333
COc1ccc(CCNC(=O)Nc2ccc3c(c2)C(=O)Nc2ccccc2O3)cc1	0.619724
COc1ccccc1N(CC(=O)N1CCN(C)CC1)S(=O)(=O)c1ccccc1	0.688382
Cc1cc2nc(C(C#N)=Cc3cn(Cc4ccc([N+](=O)[O-])cc4)c4ccccc34)[nH]c2cc1C	0.745562
COc1ccc(-c2nc(CN(C)C(C)c3cccs3)c(C)o2)c(C)c1C	0.873333
CSc1nnc(C)c(C=CNc2ccc(C)cc2)n1	0.759933
Cc1cc(CNCc2c(C(F)(F)F)nn(C)c2Cl)n(C)n1	0.70938
O=C(CN1CCCCC1=O)NCC1CCCCN(Cc2ccccc2)C1	0.960604
CCOc1ccc(NS(=O)(=O)c2ccc(NC(=O)c3ccccc3SC)cc2)cc1	0.993974
CCn1cc(O[C@@H]2CN(c3nnc(C)o3)C[C@H]2O)cn1	0.577214
COc1ccc(N2CCN(CCCNC(=O)C3CCN(C(=O)c4nnn5c4COC(c4cc(Cl)ccc4OC)C5)CC3)CC2)cc1	0.891367
O=C(CNCc1ccco1)c1ccc(-c2ccccc2)cc1	0.913948
CNCC1CCCN(Cc2ccc(F)c(C(F)(F)F)c2)C1	0.964109
CCC(=NCCN1CCOCC1)c1c(C(F)(F)F)nn(-c2nc3ccccc3s2)c1O	0.566601
O=C(O)c1cc(-c2ccc(O)cc2O)nc2ccccc12	0.893999
CC(=O)c1ccc2c3c(cccc13)C(=O)N(CCCO)C2=O	0.890494
CC(C)Cn1ccnc1CNC(=O)Nc1nc2c(s1)COCC2	0.925224
Cc1ccc2oc(-c3nc(Cn4ccnn4)no3)cc2c1	0.893807
O[C@@H]1C[C@H]2CN(Cc3cc4c(cc3Cl)OCO4)C[C@H]2C[C@H]1N1CCOCC1	0.990051
Cc1c(-c2cncn2CCCN2CCCCC2)[nH]c2ccccc12	0.991251
O=c1cc(C2CCCNC2)nc(-c2ccc(CN3CCSCC3)cc2)[nH]1	0.969316
Cn1nc(-c2nc(Cn3cnc4ccccc43)no2)cc1F	0.770051
CCCCSCC(=O)N1CC(=O)Nc2ccccc21	0.843886
Cc1cccnc1CN1CCN(C(=O)Cn2ccccc2=O)CC1	0.987925
Cc1cccc(NC(=O)c2cc(NC(=O)Cc3ccccc3)ccc2N2CCCCC2)n1	0.996107
COCCC(NC(=O)c1c[nH]c2ccc([N+](=O)[O-])cc12)C(=O)O	0.904473
c1ccc(C2=NC(c3ccccc3)N=C2c2ccccc2)cc1	0.66685
COc1cc(OC)c(OC)cc1CNC(C1CC1)C1CC1	0.988074
CCC(CC)C(=O)Nc1ccc(Nc2ccc(-n3nc(C)c(C)c3C)nn2)cc1	0.668296
CCOc1ccc(NC(=O)CC2C(=O)N(c3cccc(Cl)c3)C(=S)N2CCN2CCC(C)CC2)cc1	0.620466
CN(C(=O)COc1ccc(Br)cc1)c1ccccc1	0.996365
O=C(Cc1ccc(Cl)cc1)N1CCC2C(=O)N(Cc3ccccc3)CCN2CC1	0.564587
CN(C)c1ncccc1C(=O)N1CCc2c(cccc2C(=O)O)C1	0.634897
O=C(NCc1ccccn1)[C@@]12CCO[C@@H]1CCN(c1ncccn1)C2	0.573321
CC(=O)C[n+]1c2ccc([N+](=O)[O-])cc2n2ccccc21	0.996162
CC(C)(C)C(Nc1ccc([N+](=O)[O-])cn1)c1cccs1	0.657098
C=CCCC(CN1CCCOCC1)Oc1ncc(F)cn1	0.953312
COc1ccc(CN2C[C@@H]3NC(=O)CN(C)C(=O)c4ccc(C)c(c4)Oc4cccc(c4)CO[C@H]3C2)c(OC)c1OC	0.816163
O=C(c1csc([N+](=O)[O-])c1)N1CCC2(CC1)OCCO2	0.981545
CN(C)CCSSCCNC(=O)c1csc(CCc2ccccc2)n1	0.521819
CCc1ccc(C(=O)N(C)CCC(=O)O)cc1[N+](=O)[O-]	0.952097
CC(C)NC(=O)Nc1ccc2nc(N[C@@H]3CCc4ccccc43)ccc2c1	0.659857
CC(Cc1nc(C2CC3CCC(C2)N3)no1)c1cnn(C)c1	0.880607
O=C(Nc1ccc(NC(=O)c2ccco2)cc1)c1ccc(Cl)c(Cl)c1	0.979813
CN1[C@H](CO)CC[C@H]1c1nnnn1Cc1ccccc1	0.837404
O=C(c1ncoc1-c1ccco1)N1CCCN(c2nccs2)CC1	0.992967
N#Cc1c(NCc2ccco2)nc2ccccn2c1=N	0.937189
O=C(c1cc2c(s1)CCCC2)N1CCCN(c2nnc3ccccn23)CC1	0.992172
CN(C(=O)c1ccc(C(F)(F)F)cc1)C1CCN(C(=O)c2cncn2C)CC1	0.545329
Cc1cc(C)cc(NC(C)C(=O)N2CCN(c3ccccc3)CC2)c1	0.969207
O=C(C=Cc1cncc(F)c1)Nc1ccccc1SC1CCCC1	0.733489
CN1CCN(c2nccc(C(F)(F)F)n2)CC12CCNC(=O)CC2	0.611619
O=C(NC1CCCCC1)C1CCN(C(=O)c2cc3n(n2)CC(c2ccc(Br)cc2)OC3)CC1	0.624432
O=C1/C(=C\c2cc(Br)ccc2OCc2ccccc2F)SC(=S)N1c1cccc(F)c1	0.994558
CC1CNCCN1C(=O)c1ccc(Br)cn1	0.994766
CSc1nc(C(=O)N2CCc3c(cnc(C)c3CNC(=O)C=Cc3cccs3)C2)cs1	0.996052
O=C(c1cccc(Nc2ncccn2)c1)N1CC(C(F)(F)F)C1	0.586318
Clc1ccc(CN2CCN(C3CCNC3)CC2)cc1Cl	0.975483
C=CC(=O)N1CCC(C(=O)N(C)Cc2cccc(C)n2)CC1	0.761158
CCC1CN(C(=O)C(C)C)CCC1NCc1csc(COC)n1	0.708814
CCCCCCCOc1ccccc1/C=N/NC(=O)c1cccc(Br)c1	0.82667
Cc1ccc(CN(Cc2cccnc2)CC2CCN(C3CCCC3)CC2)s1	0.998468
C[C@@H]1c2nc(C3CC3)nn2CCN1C(=O)c1ccncc1Cl	0.98368
O=C(/C=C1/NC(=S)N(c2ccccc2)C1=O)c1ccc(Cl)cc1	0.978628
Cc1ccc(NC(=O)C2CCCN2)c2cccnc12	0.976936
Cc1cccc(NC(=O)CSCC(=O)N(Cc2ccc(N(C)C)cc2)C(C)C)c1	0.905107
Cn1c(C(=O)N(Cc2ccccn2)C2CC(C)(C)NC(C)(C)C2)cc2sccc21	0.994893
COc1cc(C(c2nnnn2C(C)(C)C)N2CCC(C(N)=O)CC2)cc(OC)c1OC	0.986948
COc1ccc(NC(=O)CSc2nnc(-c3ccc(NC(=O)c4ccccc4C)cc3)n2C)cc1	0.809673
CCc1nc2cc(N3CCC(C(=O)NCc4cccs4)CC3)cnc2nc1CC	0.926486
Cn1cc(-c2noc(C3CCCN3Cc3ccccc3)n2)nn1	0.604338
COc1ccccc1C(=O)N/N=C/c1c(O)c(Br)cc2oc3c(c12)CCCC3	0.757278
COCCN1CCCC(O)(CN2CCN(c3cnccn3)CC2)C1=O	0.975711
CC(=NOCc1ccccc1)c1cc(-c2ccc(F)cc2)n(-c2cccc(C)c2)c1C	0.990111
O=C(Nc1ccc(CN2CCOCC2)c(Cl)c1)c1ccoc1	0.646292
CSC1=NN2C(=N)/C(=C/c3cc(C)n(-c4cc(C)cc(C)c4)c3C)C(=O)N=C2S1	0.994335
CCOc1cc(/C=C2\SC(=S)N(CCCc3ccccc3)C2=O)cc(Cl)c1O	0.930891
CCOc1ccc(NC(=O)c2ccc(NS(=O)(=O)c3ccc(C)cc3)cc2)cc1	0.896785
CN1CCCN(C)c2cccc(n2)CCCN(C(=O)c2cnn(C)c2)CC1=O	0.988639
Cc1ccc2ncc(C(=O)N[C@H]3CC[C@H](Oc4ccccc4)CC3)n2c1	0.983396
CCOC(=O)C1CCN(Cc2nc3ccc([N+](=O)[O-])cc3c(=O)n2-c2ccccc2F)CC1	0.996458
CC(=O)c1cnc(Nc2nc(C)c3cc(C)c(C)cc3n2)nc1C	0.996314
COc1ccc2[nH]c(=O)c(CN(c3ccc(C)cc3C)S(=O)(=O)c3ccccc3)cc2c1	0.917469
CCN1CCCC1CNc1nc(-c2ccccn2)nc2c1CCN(C(C)=O)C2	0.917221
Cc1cc([N+](=O)[O-])ccc1NS(=O)(=O)c1ccc(Cl)cc1	0.743905
CCc1nc(NCCNC(=O)Nc2ccc(C(C)C)cc2)c2cc(Cl)cc(Cl)c2n1	0.558263
Cc1ccc2cc(CBr)ccc2n1	0.879424
COc1c(C(O)C(Cl)Cl)ccc(F)c1F	0.693018
CCCc1noc(CCCC(=O)NC(C)c2sc(C)nc2C)n1	0.532973
Cc1nc(C)c(C(=O)NCCCc2cn(-c3ccccc3)nc2C)o1	0.867903
C=C(C)Cn1c(N/N=C(\C)c2ccccc2)nc2c1c(=O)n(C)c(=O)n2C	0.874564
COc1ccc(-n2ncc(Oc3cccc(C(C)C)c3)c(Nc3ccc(C(=O)NCCN4CCOCC4)cc3)c2=O)cc1	0.975894
Cc1cc(CN(CCc2ccccc2)CC2CCN(C)CC2)cc(C)c1O	0.998886
CCOCCOC(=O)c1ncn2c1COC(c1cc(Br)ccc1OC)C2	0.678348
COc1ccccc1CN1CCC(CN)C1	0.997074
Cc1nc(N2CCCC(COc3ccncc3)C2)c2ccncc2n1	0.989565
Cc1cnc2n1CCC(NC(=O)c1cn3cc[nH]c(=O)c3n1)C2	0.868456
CC(=O)Nc1ccc(C(=O)Nc2ccc(OC(F)(F)F)cc2)cc1	0.66579
COc1coc(CN2CC(=O)NCC2c2ccccc2)cc1=O	0.959467
CN1CC2(CCN(C(=O)c3ccco3)CC2)Oc2ncccc2S1(=O)=O	0.646191
O=C(c1cccc(OCc2cn3ccccc3n2)c1)N1CCCC1	0.935353
Cc1cccc(-c2nn(-c3cccc(F)c3)c(-c3cccc(C)c3)c2C)c1	0.982588
CCNc1cc(C)nc(Nc2ccc(NC(=O)CC(C)C)cc2)n1	0.994354
CC(C)c1noc(C2CCCN(Cc3nc4ccccc4n3C)C2)n1	0.997903
CCN(Cc1ccoc1)c1nc2c(=O)[nH]c(=O)n(C)c2[nH]1	0.995936
CC1CNCCN1C(=O)c1csc(-c2cccs2)n1	0.99788
CCn1nc(CNC(=O)c2ccccc2C)c2ccccc21	0.636106
COc1cc(C=CC(=O)N(C)Cc2ccc(Br)cc2)ccc1OC(F)F	0.63808
Cc1cc(N2C(=O)C(=O)C(=C(O)c3ccc(OC(C)C)cc3)C2c2ccc([N+](=O)[O-])cc2)no1	0.998158
CCCCOc1ccc(/C(O)=C2/C(=O)C(=O)N(CCCN(C)C)C2c2cccc(Oc3ccccc3)c2)cc1C	0.997463
Cc1cc(N2CCN(c3ncccn3)CC2)nc2ccc(NC(=O)Cc3ccc(Cl)c(Cl)c3)cc12	0.873389
CCn1cnnc1CNC(=O)N1CCOc2cc(N(C)C)ccc21	0.830345
COc1ccccc1N(Cc1cc2ccc(C)cc2nc1O)C(=O)c1cc(OC)c(OC)c(OC)c1	0.996671
O=c1[nH]c(CSc2nc3ccccc3s2)nc2c(Br)cc(Br)cc12	0.971817
Cc1cc(C(=O)N(CC(F)(F)F)c2cccc(Cl)c2)on1	0.928146
Cc1cs/c(=N\C(=O)c2cccc(Cl)c2)n1Cc1ccc(C(=O)NCCN(C)C)o1	0.723422
O=C1Nc2ccccc2C1=Cc1ccc(O)c(C(F)(F)F)c1	0.856683
COc1ccc(OC)c(COC(=O)CCc2nnc[nH]2)c1	0.998514
Cc1cc(=O)c(C(=O)NC2CC2)c(CCc2ccccc2)n1CCN(C)C	0.972624
Cc1ccoc1C1Nc2ccccc2NC2=C1C(=O)CC(C)(C)C2	0.994622
Cc1cc(C=C2C(=O)N(Cc3ccc4c(c3)OCO4)C(=S)N2C)c(C)n1-c1cccc(C(F)(F)F)c1	0.608531
Cc1ccc(COc2c(Br)cc(C=C(C#N)c3nc4cc(C)ccc4[nH]3)cc2Br)cc1	0.981822
CCN1CCN(C(=O)c2ccsc2)CC1	0.874466
CC(=O)Nc1cccc(C(C)NCCN2CCCCCC2)c1	0.989545
O=C(CCl)Nc1cncnc1	0.504569
CC(C)OC(=O)COc1ccc2c(c1)OC(=Cc1ccccc1)C2=O	0.967678
O=C(C1CC=CCC1)N1CC(Oc2nccs2)C1	0.721185
O=[N+]([O-])C(=C\Nc1ccc(Cl)cc1)/C=N/c1ccc(Cl)cc1	0.998122
CCc1ccc(-c2nc3sc(N4CCN(Cc5cccnc5)CC4)nn3c2NC2CCCC2)cc1	0.69912
CCCc1nc(C)c(C(=O)N2CC(F)(F)CC2C#N)s1	0.738223
CN1C(=O)C(=Cc2ccc(OCc3ccccc3F)c(Br)c2)C(=O)NC1=S	0.998996
O[C@H]1Cc2ccccc2[C@H]1n1cc(-c2nccs2)nn1	0.592018
CN(Cc1cn(C)nn1)C[C@@H]1C[C@H](F)CN1Cc1ccnn1C	0.992576
c1ccc(-c2nc(CN3CC4(CCC4)c4ccccc43)cs2)nc1	0.996384
S=C(Nc1ccc2nccnc2c1)N1CCCC1	0.842283
COc1cc2c(cc1CN1C[C@@H]3[C@H](CN(C)C)[C@H]4CC[C@]3(C1)O4)OCO2	0.996448
CCOc1cc2c(cc1OCC)CN(C(=O)CCc1ccccc1N)CC2	0.989989
CC(C)n1nc(O)c2c(-c3cccs3)c3oc4c(O)c(O)ccc4c3nc21	0.935966
Cc1nc(O)c2c(n1)CN(c1ncnc3scc(C)c13)C2	0.985089
Oc1cc(-c2nc3ccccc3s2)cc2c1OCCN(Cc1ccccn1)C2	0.999322
Fc1ccc(N2CCC(Nc3nccs3)C2)c(F)c1	0.810104
COc1ccc(NC(=O)CSc2nnc(COc3cccc(C)c3)n2Cc2ccccc2)cc1	0.817177
CN1CC[C@H]2CC[C@@H](C1)N2C(=O)CCCOCc1ccccc1	0.925009
COc1ccc(C(C)C(=O)N2CCNCC2c2ccccc2)cc1	0.84325
CCc1ccc(C2CN(Cc3nc(CC4CC4)no3)CCO2)cc1	0.980273
COC(=O)CC1COCCN1C(=O)c1cnc(C2CC2)o1	0.719756
O=C(N/N=C/c1cc(Cl)c(O)c(Cl)c1)Nc1ccccc1	0.995878
CCN(CCNC(=O)CCC(C)C)c1ccccc1C	0.684983
COCCC(C)NCc1ccc2ccccc2c1	0.989835
COc1cc(C)ccc1S(=O)(=O)NCCN1CCCC(CO)C1	0.975898
Cc1ccc(-n2nnnc2CC=NNc2ccc(Cl)cc2)cc1	0.878316
CN(CCC#N)c1ccc(/C=c2\sc3nc4ccccc4n3c2=O)cc1	0.966285
C=CCOc1ccc(-c2nn(-c3ccccc3)cc2/C=c2\sc3nc(=O)c(Cc4ccc(C)cc4)nn3c2=O)c(C)c1	0.992457
CCOc1cc(/C=N\NS(=O)(=O)c2ccc3ccccc3c2)ccc1OCC(=O)N1CCOCC1	0.690303
CCOc1cccc2cc(C(=O)Nc3nnc(-c4ccc5c(c4)OCO5)o3)oc12	0.992345
COc1ccc(CN2CCOc3ccccc3CCCCC3(CCN(C(=O)c4nccn4C)CC3)C2)cc1	0.984834
CC(=O)OCC(OC(C)=O)C(OC(C)=O)C(OC(C)=O)C(OC(C)=O)C1SCCN1C(C)=O	0.988125
Cc1cc(C)nc(NC(=O)c2c(C)ccn(-c3ccc(F)cc3)c2=O)c1	0.966495
Cc1ncc(CO)c2cc(-c3nc(-c4ccc(Cl)cc4)cs3)c(=Nc3ccc(S(N)(=O)=O)cc3)oc12	0.77536
CC(C)c1nccn1CC(=O)N1CCC(C2CCCN2)CC1	0.848419
COCCn1ccc2cc(C(=O)N3C[C@H]4C[C@@H](C3)c3ccc([N+](=O)[O-])c(=O)n3C4)ccc21	0.997551
COc1ccccc1-c1noc(C2CCN(Cc3nc(-c4ccccc4)no3)CC2)n1	0.744825
Cc1noc(C2CCCN(C(=O)Nc3cnn(C)c3Cl)C2)n1	0.870336
CCN(CCNC(=O)CC(C)N)C1CC1	0.870739
CCOc1cc(/C=C(/C#N)C(=O)Nc2cc(C)ccc2C)ccc1O	0.658506
Cc1cc(C(=O)Nc2ccc3ncn(C)c3c2)c(C)n1-c1cccnc1	0.902369
Nc1ncnc(N2CCC(NC(=O)CCc3cn[nH]c3)C3(CCC3)C2)n1	0.893632
COC(=O)c1ccc2c(=O)n(-c3cc(C)cc(C)c3)c(N3CCC(C)CC3)nc2c1	0.954317
COc1c(Br)cc(Br)cc1/C=N/c1ccc(O)cc1	0.95761
CC(C)COCCCNCc1cccc(Br)c1	0.663569
CCn1c2ccccc2c2cc(P(=Nc3ccc(C)cc3)(N3CCCC3)C(C)(C)C)ccc21	0.994731
CCOC(=O)c1c(C)[nH]c(C)c1C(=O)COc1ccc2c(C)cc(=O)oc2c1C	0.892759
CCc1ccc(-c2nccn2C2CCCN(c3ncccn3)C2)cc1	0.673711
S=C(Nc1ccccc1)OC1CCC2CCCCC2C1	0.534964
CCOC(=O)Cn1c(-c2cccnc2)nc2ccccc21	0.991451
COC(=O)c1cc(NC(=O)c2ccc(C)cc2)cc(C(=O)OC)c1	0.787021
COc1ccc(Oc2nccnc2C2CCCN(Cc3ccnc(N4CCOCC4)n3)C2)cc1	0.930915
CCOc1ccc(Nc2nc(NCCc3ccccc3)nc3c2cnn3-c2ccccc2)cc1	0.641655
Cc1ccc(-c2cc(C(=O)Nc3cc(S(=O)(=O)Nc4ccccc4Cl)ccc3N3CCOCC3)c3ccccc3n2)cc1	0.915285
CCOCCC(=O)N1C[C@H]2CCN(CC(C)C)CC[C@H]2C1	0.829436
CCC(=O)Nc1ccc(C)c(NC(=O)N2CCC(N3CC=CC3)C2)c1	0.8029
C=C(C)[C@H]1C[C@H](c2ccccc2Cl)[C@H](c2ccc(OC)cc2)O[C@@H]1c1cc(F)ccc1OCC(=O)O	0.681366
CCOc1ccc(CCC(=O)N2CCc3nc(-c4cnccn4)nc(O)c3C2)cc1	0.930706
N#CC1(CNCc2c(Cl)nc3ccccn23)CCOCC1	0.978761
CN(C(=O)C1CCN(C(=O)N2CCCC2)CC1)c1cnc2ccccc2n1	0.981419
CCOC(=O)c1c[nH]c(=O)c(C(CC(=O)NCc2ccc3c(c2)OCO3)c2cc(OC)c3c(c2)OCO3)c1O	0.882128
COc1cc(C)cc(C(=O)N2CCc3sccc3C2c2cccs2)c1O	0.829421
Cc1cccc(C(C)C)c1NC(=O)c1cn2c3c(cccc3c1=O)CC2	0.867532
O=[N+]([O-])c1cc(C(c2ccc(Cl)c([N+](=O)[O-])c2)C(Cl)(Cl)Cl)ccc1Cl	0.945371
Cc1csc(NC(=O)c2ccc(S(=O)(=O)NCc3ccco3)cc2)n1	0.936806
COCc1ncc2c(n1)CCN(C(=O)C(C)OCc1cccc(OC)c1)C2	0.915942
Cc1ccc(O[C@@H]2C[C@@H]3CN(C(=O)c4ccc(F)c(C)c4)C[C@@H]3C[C@H]2O)c(C)n1	0.913748
O=c1ccc2ccc(O)c(CN3CCCC4=C[C@H]5C[C@@H](CN6CCCC[C@H]56)[C@@H]43)c2o1	0.993693
CCc1nc(CNc2cc(C)ccc2Br)no1	0.994067
COC(=O)C([NH3+])Cc1ccc([N+](=O)[O-])cc1	0.991913
Cc1c(C([O-])=C2C(=O)C(=O)N(CC[NH+]3CCOCC3)C2c2ccccc2F)cnn1-c1ccccc1	0.945444
CCOC(=O)c1c(NC(=O)CCCN2C(=O)/C(=C\c3ccc(C)cc3)SC2=S)sc2c1CCCC2	0.77228
Cc1cc(N2CCN(C)CC2)ccc1NC(=O)c1ccc(C(F)(F)F)nc1	0.970772
Cn1cnc(CNC(=O)Cn2c(=O)[nH]c3ccccc3c2=O)n1	0.89849
CCN1C(=O)SC(=Cc2ccc(O)c(Br)c2)C1=O	0.617883
O=C1N=C(O)/C(=C\NC2CC2)C(=O)N1c1ccc(I)cc1	0.694402
CCc1cc(C)cc(OCCOc2ccc(Cl)cc2/C=N/n2cnnc2)c1	0.994419
Cn1c(=O)c2c(nc(N3CCN(C(=O)C4CC4)CC3)n2C)n(C)c1=O	0.972239
OC[C@H]1O[C@@H](c2ccc(Cl)c(Cc3ccc(OCCOC4CC4)cc3)c2)[C@H](O)[C@@H](O)[C@@H]1O	0.771965
CSc1nc2cc([N+](=O)[O-])ccc2n1C	0.978903
CC1CN(C(=O)c2ccc(NC(=O)c3cccs3)cc2)CC(C)O1	0.919002
CCCc1nc2sc3c(N(CC)CCO)nc(SC)nc3c2c2c1CCC2	0.995997
Cc1ccc(N2C(=O)C(=Cc3ccc(-c4ccccc4[N+](=O)[O-])o3)C(=O)NC2=S)cc1	0.995736
Cc1ccccc1C(=O)N/N=C/c1ccc(/C=N/NC(=O)c2ccccc2C)cc1	0.991155
CC(C)N(CCO)c1ccc(-c2nc(-c3ccccc3F)no2)cn1	0.747662
O=C(NCc1nc2ccccc2o1)c1cnc2ccccn2c1=O	0.979428
COC(=O)c1cn(-c2ccc3c(c2)OCC(=O)N3)cc2c(O)nnc1-2	0.978201
COc1cc(F)cc(CN2CCCC(O)(CC(N)=O)C2)c1	0.924661
CN(CCCc1nc(C[C@H]2C[C@H](F)C2)no1)C(=O)c1ccncc1	0.974345
Cc1cccc(C(=O)N2CCN(C(=O)c3cccc(O)c3)CC2)c1C	0.588793
Cc1ccc2c(O)c(C(=O)Nc3cnn(CC4CCCO4)c3)cnc2n1	0.9986
Nc1ccc2c(c1)Cc1ccccc1-2	0.881816
CC(C)CNC(=O)c1cc(C2CCN(C(=O)CC3(O)CCCCC3)C2)nc2ccccc12	0.509441
CC(C)c1ccc(NS(=O)(=O)c2c[nH]c3ccc([N+](=O)[O-])cc23)cc1	0.916236
O=CN1CCN(C(=O)Cc2c[nH]c3ccccc23)CC1	0.987416
COCCCn1c(C)c(C)c(-c2nc3ccccc3[nH]2)c1NC(=O)c1ccc(C)cc1	0.965434
O=C(Nc1cc(Cl)ccc1O)c1ccc(Oc2cc(Oc3cccc(Cl)c3)cc([N+](=O)[O-])c2)cc1	0.997499
Cc1ccc(/C=C2/SC(=S)N(CCC(=O)Nc3nnc(C)s3)C2=O)cc1	0.962064
Cc1ccc(CC(=O)N2CCCC(c3cc(C(N)=O)[nH]n3)C2)cn1	0.664506
COC(=O)c1cnc(N[C@@H]2COC[C@H]2Cc2ccncc2)cn1	0.942265
O=C(NCC1CCN(Cc2ccccc2F)CC1)C1CCN(c2nc3ccccc3[nH]2)CC1	0.996906
CCCCC1CN(c2cccc(-c3ccccc3)c2)C(=O)CN1C(=O)c1cscn1	0.92047
CC(=O)c1cn(Cc2cn3c(C)cccc3n2)c(=O)n(C)c1=O	0.950194
O=C1NC(=O)N(c2ccc(F)cc2)C(=O)/C1=C\c1ccc(-c2ccc(Cl)c([N+](=O)[O-])c2)o1	0.997781
CCOC(=O)C1CC[NH+](CCC(=O)Nc2ccccc2Cl)CC1	0.996977
NCCCN(Cc1ccccc1)C(=O)CNCC1CC1	0.993492
CCOC(=O)C1CCN(C(=O)[C@H]2CCCN2C(=O)c2ccc3[nH]c(Cc4ccccc4)nc3c2)CC1	0.799889
O=C(CN1CCC(NC(=O)c2ccc([N+](=O)[O-])cc2Cl)CC1)Nc1ccccc1	0.98984
COCCN1C(=O)c2ccccc2NC1c1nccs1	0.782572
O=C(Nc1ccc2oc(-c3ccccc3Br)nc2c1)c1ccc(F)cc1	0.974052
CCc1cc(=O)n2nc(N3CCN(CC(O)CC)CC3)sc2n1	0.994503
COc1ccc(NC(=O)C2CCN(C(=O)c3nnn4c3COC(c3ccccc3Cl)C4)CC2)cc1F	0.70763
CCOc1cc(/C=N\NC(=O)c2ccc(C)nc2)ccc1OC(=O)c1ccccc1	0.999815
CN1CCN(C2CCN(C(=O)OC(C)(C)C)CC2)CC1	0.956191
COc1ccc2nc(C)cc(C(=O)N3CCCc4cc(S(C)(=O)=O)ccc43)c2c1	0.996008
O=c1c(Oc2ccccc2Br)coc2cc(OCc3ccc(Cl)cc3)ccc12	0.995302
Cc1ccc(NC(=O)Cn2cnnn2)nc1	0.938856
CN(C)c1cccc2sc(C(=O)Nc3cnn(CCCN)c3)cc12	0.994975
O=C(CC1CN(Cc2ccccc2)CCO1)NC1CC=CCC1	0.76199
COC(=O)CNC(=O)c1nnn2c1COC(c1ccc(OC)c(OC)c1)C2	0.843031
COc1cc(C(=O)N2CCNC(C)C2C)sc1Br	0.977358
Cc1ccc2ncc(C#N)c(N(C)CC(C)C(=O)O)c2c1	0.917529
Cc1ccc(-c2cc(C(=O)NCC3(C)CCNCC3)[nH]n2)cc1	0.995119
O=C(NN(C(=O)c1ccccc1F)c1ccccc1)c1ccc([N+](=O)[O-])cc1	0.98022
Cc1cnccc1NCC1CCCN(c2ncccn2)C1	0.982171
Cc1nc2c(C#N)cnn2c(O)c1CC(=O)Nc1ccc(N2CCCC2=O)c(Cl)c1	0.565754
Cc1c(N)ncn(Cc2ccc(OC(C)C)c(Cl)c2)c1=O	0.95122
COc1ccc(Cl)cc1C1Cn2nc(C(=O)N3CCCC(C(=O)NCCN(C)C)C3)cc2CO1	0.853675
CN(c1cccc(Cl)c1)S(=O)(=O)c1cccc(C(=O)NCCCCN)c1	0.964706
COc1ccc(C=C(C#N)C(=O)Nc2cc(C(F)(F)F)ccc2Cl)c(OC)c1	0.667377
COc1ccc(-c2noc(-c3ccc(OC(C)=O)cc3)n2)cc1OC	0.997943
COc1cc(C2NC(=O)c3ccc(Cl)cc3N2)cc(OC)c1O	0.973773
NC1(C(=O)N2CCN(C(=O)c3ccc([N+](=O)[O-])cc3)CC2)CCCCC1	0.648318
O=C(Nc1ccc(C(=O)N2CCOCC2)cc1)Nc1ccc([N+](=O)[O-])cc1	0.991897
COc1ccc(CN(Cc2ccco2)C(c2cc3c(C)ccc(C)c3[nH]c2=O)c2nnnn2C2CCCC2)cc1	0.793534
O=c1ccccn1CCN1CCN(CCOc2ccc(F)cc2)CC1	0.985402
c1cc(CN2CCOCC2)nc(C2CCCN2)c1	0.844453
Cn1cc(CCC(=O)NC(c2ccc3c(c2)CCO3)[C@H]2C[C@H](O)C2)cn1	0.623312
Cc1cc(C)nc(CCNC(=O)C2CCCN(C(=O)N(C)C)C2)n1	0.649223
CCn1cc(C2CN(Cc3nc(C(C)(C)C)no3)CCO2)cn1	0.984581
CCCCOc1ccccc1C=c1sc2nc(=O)c(Cc3ccc(C)cc3)nn2c1=O	0.886618
COc1ccc2cc(C(=O)N(C)Cc3ccco3)c(C)nc2c1	0.953692
COc1ccc2[nH]c3c(c2c1)CCNC3c1ccc(OC)c(COc2ccc(Br)cc2)c1	0.999845
CCN(CCCNC(=O)N1CCN(c2cnccn2)CC1)c1ccccc1	0.889973
O=C(c1cc(N2CCCC2)ccn1)N(Cc1ccccc1)C1CC1	0.554486
COc1ccc(OC)c(C(C)N(c2cccc(C)c2)S(=O)(=O)c2ccc(F)cc2C)c1	0.750296
CN(C)c1ccc(C=Nc2ccc(N)c(Br)c2)cc1	0.996141
Cc1cc(C)c(C#N)c(SCC(=O)Nc2ccccc2[N+](=O)[O-])n1	0.60646
COC(=O)c1c(COC(=O)c2ccc(Cl)nc2)nc2ccccc2c1-c1ccccc1	0.767108
Cc1ccc(C(=O)N2CCC(NC(=O)c3[nH]nc4c3CCCC4)CC2)cc1	0.91457
COC(=O)C12CCC(CNc3cc(C)nnc3C)(CC1)CC2	0.988873
O=C(Nc1cccc(F)c1)N1CCCN(c2nc3cc(F)ccc3n3cccc23)CC1	0.968474
Cc1cc(C)cc(NC(=O)CCn2c(=O)c3cccn3c3cccnc32)c1	0.99044
Cc1cccc(CN2CCN(Cc3cccc(F)c3)CC2)c1	0.882753
COCCn1c(SCc2cccnc2)nc2ccc(Br)cc2c1=O	0.81831
Cc1cc(C2CCC2)oc(=O)c1C(=O)Nc1cccc(CN2CCCC2)c1	0.51169
COc1cc(Cn2c(=O)n(Cc3ccc(C)cc3)c(=O)c3ncccc32)cc(OC)c1	0.9684
CN(C)CCn1c2ccccc2c2ccc3nc(Cl)ccc3c21	0.998457
COCCOCCN1C[C@@H](c2ccccc2)O[C@@H](C2CC2)C1	0.67478
CN1CCN(C(=O)CCNC2CC3(CCC3)Oc3ccccc32)CC1	0.987488
COc1ccc(/C=C/CN2CCC(=O)N(Cc3ccccc3Cl)CC2)cc1	0.72134
Cc1ccc(-c2cn(-c3ccccc3)nc2/C=C/C23NC(=O)CN2c2ccc(C)cc2C3(C)C)cc1	0.851093
COC1C(C)C(NC(C)c2nc3ccccc3o2)C1(C)C	0.946308
Cc1cccc(OCC(O)Cn2c(C3CC(=O)N(c4cccc(C)c4)C3)nc3ccccc32)c1	0.991518
O=C(Nc1ccc2sc(-c3ccc(Cl)cc3)nc2c1)c1ccco1	0.971075
CN1CCOC2CCN(C(=O)NCc3cccnc3OC3CCCC3)CC21	0.889153
C=CC(=O)N1CCN(C(=O)c2cccnc2)CC1	0.993703
CN1CCN(c2[nH]c(=O)[nH]c(=O)c2C#N)CC1	0.980761
CNCC(O)Cn1cc(C)c(C(C)=O)c1C	0.831557
COc1ccc(F)c(OCc2ccns2)c1	0.701359
O=C(CCC1CCNCC1)NCC1CCCCN1Cc1cccc(Cl)c1	0.991136
Cc1cncc(C(=O)N2CCCC(n3ccnn3)C2)c1	0.996784
O=C(CCc1nc2ccccc2[nH]1)N1CCCCC1Cn1cccn1	0.947646
COc1cc(NC(=O)CN2CCN(C(=O)C(OC)OC)CC2)cc(OC)c1	0.975641
Cc1c(C(=O)N(C)CCc2ncon2)ccc2cncn12	0.634879
CN1CCN(CCCNC(=O)c2nc(Cn3nc(-c4ccccc4)ccc3=O)no2)CC1	0.943259
Cc1ccc(C)c(OCCC(=O)Nc2cccc([N+](=O)[O-])c2)c1	0.967794
CCc1ncoc1C(=O)N[C@H]1CC[C@H](Nc2ncnc3nc[nH]c23)CC1	0.994502
S=c1[nH]cc(-c2ccc(Br)cc2)n1Cc1ccco1	0.726588
CN(C)CCCNC(=O)CCCc1cccs1	0.692854
CCN1CCN(c2ccc(NC(=O)CCc3c(C)nc4cc(-c5cccc(F)c5)nn4c3C)cc2)CC1	0.968508
Cc1ncncc1C(C)NCc1ccc2c(c1)CC(C)O2	0.956008
COc1cc(-c2cc(C)c3cc(C)c(O)cc3n2)cc2c1OCO2	0.998212
Cc1ccccc1CCC(=O)N1CCNC[C@@H]1C	0.902807
CCOC(=O)c1cc2c(=O)n3ccccc3nc2n(CCc2ccccc2)c1=NC(=O)c1cccc(C(F)(F)F)c1	0.940359
Cc1c(C(=O)C=CN(C)C)sc2ccccc12	0.992773
Cc1cc(CNC(c2ccccc2)C2(CO)CCOCC2)c(C)nn1	0.995449
COCc1noc(CN(C)[C@H]2C[C@H]3CC(=O)NC[C@H]3C2)n1	0.856779
C=CCc1ccc(OCC(O)CN2C[C@@H](C)C[C@H]2CO)c(OC)c1	0.962744
Brc1coc(CN(CCc2ccccc2)C2CCOC2)c1	0.964466
Cc1ccc(-n2nc(C(=O)N3CCN(C(=O)CN4CCCC4)CC3)c3ccccc3c2=O)cc1Cl	0.958432
CCc1ccccc1NC(=O)Cn1cc(-c2ccc(C)cc2)[n+]2c1CCC2	0.63433
O=C(NC1(CNc2ccc3nnnn3n2)CCC1)c1ccc(=O)[nH]c1	0.992537
COc1ccc(/C=C2/C(=O)N=C(S)N(CCC3=CCCCC3)C2=O)cc1COc1ccc(NC(C)=O)cc1	0.991485
Fc1ccc(C2CN(CC3CCCNC3)CCO2)cc1Br	0.997232
Cc1noc(C2CN(C(=O)Cc3ccccc3C)CCCN2CC(C)C)n1	0.760733
COC(=O)c1cc2c(nc1-c1cccnc1)CCN(Cc1cccc(OC)c1)CC2	0.990808
CON=CC(C#N)=Cc1ccccc1[N+](=O)[O-]	0.842416
CN(C)C(=O)c1ccnc(NCc2csc(-c3ccccn3)n2)c1	0.825827
CSc1ccc(/C=c2\sc3nc(/C=C/c4ccccc4)nn3c2=O)cc1	0.950275
COc1cccc(N2CCC(NC(=O)c3nocc3C)C2)c1	0.938773
CCC(N)(CC)CNC(=O)c1ccc(C)c(F)c1	0.909509
C=CCc1ccc2oc(-c3ccc(O)cc3)c(C)c2c1	0.99381
CCCOc1c(Cl)cc(CNC(Cc2ccccc2)C(=O)O)cc1OC	0.924318
c1ccc(CN2CCO[C@H]3[C@H](OCC4CCCC4)CC[C@@H]32)nc1	0.921588
CC(=O)Nc1ccc(-c2cc(NC(C)=O)[nH]n2)cc1	0.568259
O=C(NCCCN1CCOC(c2ccccc2)C1)C(=O)Nc1ccc2c(c1)OCO2	0.864521
CC1(NC2CCN(c3ccccn3)CC2)CCCc2ccccc21	0.81268
COc1ccc2[nH]c(C(=O)N3CCN(c4ccccc4OC)CC3)c(C)c2c1	0.970809
CCc1nc(N2CCN(C(=O)c3ccc(C)cc3)CC2)c2cnn(-c3ccc(OC)cc3)c2n1	0.988828
Cc1ccc(OCC2CCN(c3ncnc(C4CC4)c3F)C2)nn1	0.943765
Cc1ccc2nc(-c3ccccc3)c(NC(=O)CCc3ncc(-c4ccccc4)o3)n2c1	0.95158
CC1NCCCC1NC(=O)C(Cc1ccccc1)NC(=O)c1cccnc1	0.674723
Cc1cc(C)cc(NC(=O)c2oc3c(c2C)-c2nc4ccccc4nc2C(C)(C)C3)c1	0.982545
O=c1c2ccccc2nc(SCc2cccc(C(F)(F)F)n2)n1-c1cccnc1	0.927831
CCn1cc(Oc2cnc(C(=O)N3CCOC(C)(CC)C3)cn2)cn1	0.968214
CCC(CC)C(CNCc1cccc(O)c1)N(C)C	0.870251
O=C(NCc1nc(O)cc(O)n1)c1cccn2c(=O)[nH]nc12	0.926956
Cc1nc(C)c(CNC(=O)Nc2cccc(C(=O)N3CCCCCC3)c2)s1	0.588664
c1csc(CC2CCNCC2)n1	0.989349
C=CCOc1c(I)cc(C=C2C=C(c3ccc(C)cc3)OC2=O)cc1OC	0.913145
COc1ccc(NC(=O)N2CCC(c3nnc(C(=O)Nc4cccc(Cl)c4)s3)CC2)cc1	0.891597
CCOc1ccc(N2C(=O)C(=Cc3ccc(F)cc3)N=C2SCCOc2ccccc2)cc1	0.998308
O=C(Cc1noc2ccccc12)N1CCCCC2(CCN(Cc3ccccc3)CC2)C(=O)OC[C@@H](O)[C@@H](O)CC1	0.843671
CC1=NN(c2ccc(C)cc2C)C(=O)/C1=C\Nc1ccc(SC#N)cc1[N+](=O)[O-]	0.535591
COc1ccc(C=CC(=O)Nc2ccc3nc(N4CCC(C)CC4)cc(C)c3c2)cc1OC	0.990095
CC1CN(c2ncnc(NC3CCCNC3)n2)CC(CCO)O1	0.864664
COc1ccc(C(=O)N2CCN(c3ncnc4ccccc34)CC2)cc1	0.963093
Cc1cc(I)ccc1NC=C1N=C(c2ccccc2Br)OC1=O	0.798759
Cc1ccc2nc(COc3ccc(C(=O)NNC(=O)c4cccc(O)c4)cc3)cn2c1	0.988724
COc1ccc(C(=O)Oc2cc3c4c(c2)C(C)=CC(C)(C)N4C(=O)C3=O)cc1OC	0.981712
COc1ccc(C(CNC(=O)C2CCCN2)c2c[nH]c3ccccc23)cc1	0.829624
CC(=O)/N=c1/[nH]nc(CCN(CCc2n[nH]/c(=N\C(C)=O)s2)[N+](=O)[O-])s1	0.993656
Cc1ccc(CN2CCN(CC(=O)N/N=C/c3cc(Br)ccc3O)CC2)cc1	0.991076
C[C@H](O)CNC(CC1CCN(C(=O)OC(C)(C)C)CC1)c1cccnc1	0.902513
COc1ccc(CNC(=S)N2CCCN(c3ncc(C(F)(F)F)cc3Cl)CC2)cc1OC	0.912438
CC(NC(=O)c1ccc(O)nc1)c1ccc2c(c1)CCC(=O)N2	0.945866
O=C(c1ccco1)N1CCCC(NCc2ccccc2OCCn2ccnc2)C1	0.997625
COc1ccc(C)cc1/N=C(\NCc1ccncc1)NC(=O)c1ccc(OC)c(OC)c1	0.99721
Cc1cccc(-n2cc(CN3Cc4[nH]cnc4C(c4ccccc4)C3)cn2)c1	0.770097
COC(=O)[C@@H]1C[C@@H](O)CN1CCN(C)c1ccccc1	0.951597
CC1(CNC(=O)c2cnn(-c3cccc(Cl)c3)c2)CCNCC1	0.972131
Cc1nc2ncnn2c(C)c1CCC(=O)N[C@H]1[C@H]2CCO[C@H]2[C@@H]1N(C)C	0.608651
O=C(COCc1ccccc1)N[C@@H]1COCC[C@H]1Oc1ccccn1	0.950148
CCN(CCN(C)C)C1CCC(C)CC1	0.986531
COc1cc2nc(O)c(C(=O)Nc3ncccc3C)c(O)c2cc1OC	0.992293
O=C(CN1C(=O)/C(=C\c2cccc(Cl)c2)Sc2ccccc21)NCCc1ccccc1	0.886688
COc1ccc(N(C)Cc2csc(-c3ccccc3)n2)cc1OC	0.998933
O=C(CN1CCCC(c2cc(-c3ccccc3)n[nH]2)C1)NCc1nn[nH]n1	0.995158
Cc1ccccc1C(=O)N(CCCN(C)C)CC1CCN(C2Cc3ccccc3C2)CC1	0.996976
CCCCn1c([S-])nc(=O)c(C(c2ccc(OC)c(C[NH+]3CCCC(C)(C)C3)c2)c2c(O)nc(S)n(CCCC)c2=O)c1O	0.994918
O=C(c1ccc2ncccc2c1)N1CCCN(c2cc(-c3ccc(Cl)cc3)n[nH]2)CC1	0.994829
COc1cc(/C=N/N(C)c2ccccc2)cc(Br)c1O	0.835711
COc1ccc(N2CCCN(C(=O)c3[nH]nc(-c4ccccc4)c3C)CC2)cc1	0.690745
COc1cc(C)ccc1OCC(=O)c1ccc2c(c1)N(CC(=O)NCc1ccccc1)C(=O)CO2	0.510852
COc1ccc2c(C)cc(N(C)Cc3ccccn3)nc2c1	0.994712
CCCN(CCC)CCNC(=O)C1CCN(C(=O)c2nnn3c2COC(c2ccc(Oc4ccccc4)cc2)C3)CC1	0.977566
O=C(Nc1ccccc1C(F)(F)F)c1cc(-c2ccncc2)nc2c(Cl)cccc12	0.944411
CN(C)C(CNC(=O)CN1CCNCC1)c1ccccc1	0.841773
Cc1ccccc1C(=O)NC(Oc1ccc([N+](=O)[O-])cc1)C(Cl)(Cl)Cl	0.75246
O=C(NCCc1nnc2n1CCN(Cc1ccc(N3CCCC3)cc1)CC2)c1ccc(F)cc1	0.692321
CCc1nc(O)cc2cc(OC)c(OC)cc12	0.994426
CCc1c(C)nc2ccccc2c1NC(=O)NCc1ccncc1	0.633672
CC(=O)Nc1ccc(C(=O)N2CCc3oc(C4CCOC4)nc3C2)c(C)c1	0.993553
CC(=O)N1CCN(Cc2ccc(C(=O)OCc3ccc(-n4cccn4)cc3)cc2)CC1	0.994819
COc1ccc(-c2cnc(N(C)C)nc2C2CCN(C(=O)CCn3nccc3C)CC2)cc1	0.995406
O=C(c1cc(=O)c2cc(Br)ccc2o1)N1CCCCC1	0.6053
Cc1nc(COc2cccc(C(=O)N3CC(F)(F)CC3C#N)c2)no1	0.995699
Cc1cc(C)n(-c2ccc(CC(=O)N3CCN(Cc4cncs4)CC3)cc2)n1	0.994944
CCOc1cc(C=C2C(=N)N3N=C(c4ccccc4Cl)SC3=NC2=O)cc(I)c1OCc1ccccc1C	0.990897
CCC(N)(CC)CNC(=O)c1cnc2[nH]c(=O)[nH]c(=O)c2c1	0.997966
CC(C)(C)C1CCN(C(=O)C2CCCCN2)CC1	0.694416
CNCC1CCCN1C(=O)CCCOc1ccc(Cl)c(C)c1	0.801657
CN1CC[C@@H]2CN(Cc3nnc(-c4ccccc4)o3)C[C@@H]2C1=O	0.74121
C#CCOc1c(Br)cc(/C=C2\C(=O)NC(=O)N(c3ccc([N+](=O)[O-])cc3)C2=O)cc1OC	0.99895
CC(C)c1nc(CN(C)C(=O)c2ccc3[nH]c4c(c3c2)CCCC4)no1	0.878359
CC(C)(C)c1ccc(OC(=O)c2csnn2)cc1	0.560327
Cn1cc(CN2CCCN(c3ncc(Br)cn3)CC2)cn1	0.97676
Cc1cnn(C2CCN(C(=O)c3nc(C4CC4)no3)C2)c1	0.991049
CC(C)Cc1cc(C(=O)N2CCN(CC(=O)N3CCCCC3)CC2)n(C)n1	0.993203
COc1ccc(C=CC(=O)OCC(=O)c2ccc(Cl)cc2)cc1OC	0.979508
CCOCCCCNCc1ccc(-c2ccccc2[N+](=O)[O-])s1	0.993642
Cc1nc(SC(C)C(=O)N(CCC#N)c2ccccc2)c2ccccc2n1	0.727444
O=C1N=C(S)N(c2ccccc2)C(=O)/C1=C\NC(Cc1ccc(O)cc1)C(=O)O	0.665759
COc1ccc(C=NNC(=O)c2ccccc2)c(O)c1	0.997474
COc1ccc(C(=O)N2CCCCC2c2ccn3nccc3n2)cc1F	0.969232
O=C(NC1CCCC2OCCC12)c1ccc2cccnc2c1	0.903161
COc1ccc(CNCc2ncc[nH]2)cc1OC1CCCC1	0.88402
COc1ccc(-c2nc(NC(=O)C3CCCCN3)sc2C)cc1	0.863344
CCN(CC)c1ccc(NC=C2C(=O)C(C)(C)Oc3ccc4ccc(=O)oc4c32)cc1	0.955569
C(=N\N1CCN(c2ccccc2)CC1)\c1cccc2ccccc12	0.995745
COc1ccc2oc(=O)c(C(=O)Nc3nccs3)cc2c1	0.703339
CC[NH+](CC)CCCN1C(=O)C(=O)/C(=C(/[O-])c2ccc3c(c2)CC(C)O3)C1c1cccc(OC)c1	0.991311
Cc1nnc(O)nc1N/N=C/c1ccc(-n2nc(-c3ccccc3)cc2-c2ccccc2)cc1	0.990866
Cc1cc(NCC(C)CNC(=O)CCC2CCCCO2)nc(CO)n1	0.801529
CC(=O)NCC1CCCN(CCC(C#N)(c2ccccc2)c2ccccc2)C1	0.59355
O=C(c1ccccc1)N1CCC[C@]2(C[C@@H](Oc3ccccc3Cl)CO2)C1	0.961974
O=C(N=c1ccccn1Cc1ccccc1)c1n[nH]c2ccccc12	0.993457
Cc1ccc(-c2ccc(/C=C/C(=O)Nc3ccc(-c4nc5ccccc5s4)cc3)o2)cc1Cl	0.999374
CC1CCNC(C)C1NC(=O)c1ccon1	0.914755
C=CC(=O)Nc1ccc(C(=O)NCCCc2nncn2C)cc1	0.891423
COc1cc(N2C[C@H]3CC=C(C)C[C@H]3C2)ncn1	0.556983
CCCCc1nc(CN2CC[C@@H]3[C@@H](CCC(=O)N3CCCO)C2)c[nH]1	0.830059
CSc1ccccc1NC(=O)C1CCCN(C(=O)c2nnn3c2COC(c2ccccc2C)C3)C1	0.65155
CC1=C(C(=O)O)C(=O)CN1c1ccccc1	0.555177
O=C(Nc1ccc2ncccc2c1)c1cc(OCc2ccccc2)ncn1	0.986238
CC(CNC(=O)c1ccccn1)N1CCc2ccccc21	0.987055
Cc1c(C)n(CC(O)CNCCc2ccccc2)c2ccccc12	0.995192
COC(=O)C1=C(S)NC(c2ccccc2)C1c1ccncc1	0.72332
O=C(Nc1cccc(N2CCNC2=O)c1)c1cnccn1	0.651699
Fc1cc(F)cc(CN2CCN(CCc3cccnc3)CC2)c1	0.994946
CCOC(=O)c1[nH]c2ccc(F)cc2c1NC(=O)CN1CCN(c2ccccc2F)CC1	0.950169
COc1cccc(CNC[C@@H]2CCC(F)(F)[C@H]2O)c1OC(F)F	0.865666
COc1ccc(/C=N/NC(=O)c2ccccc2)cc1Cn1nc(C)c([N+](=O)[O-])c1C	0.982424
CC1CCc2ccccc2C1NCC(C)(C)N1CCOCC1	0.978981
CN(C)CCN(Cc1ccccc1)C(=O)c1ncn2c1COC(c1ccc3c(c1)OCCO3)C2	0.930071
CC(C)N=c1ccccn1C(=O)CCc1c[nH]c2ccccc12	0.746932
Fc1cc(NCc2ncoc2C(F)(F)F)ccc1-n1cccn1	0.972337
Cc1ccc(C(O)(CCNc2nc(CN3CCOCC3)nc3sc(C)c(C)c23)C(F)(F)F)o1	0.97418
O=C(CCC[C@H]1NCC2C[C@H]1CN(Cc1ccccc1)C2)NCCc1cccnc1	0.992338
OC(CNc1cncc(Br)c1)C1CCOCC1	0.935857
O=C(CCc1nc2cc(Cl)ccc2[nH]1)N1CCC(c2nnc(C3CC3)[nH]2)CC1	0.955199
Cc1cc(COC(=O)C2CCN(S(=O)(=O)c3ccc4c(c3)OCCO4)CC2)no1	0.730884
CN(C)C(=O)c1ccc(C2CN(Cc3ccnn3C)CCO2)nc1	0.866681
O=C(NCCCNCc1cccnc1)c1cc2cccc(F)c2o1	0.94415
c1cc(CNc2nccnc2C2CCNCC2)ccn1	0.913288
CC(Sc1ccc(Cl)cc1)C(=O)Nc1cc([N+](=O)[O-])ccc1Cl	0.76463
CCn1cc(C(=O)NCCC(O)c2ccccc2)nn1	0.915753
O=C1C(=Cc2ccccc2)SC(=S)N1N=Cc1ccccc1	0.918554
CCc1nnc(NC(=O)c2ccc(NCc3cnn(C)c3)cc2)s1	0.998399
O=C(NC1CCN(Cc2ccncc2)CC1)N1CCc2c(F)cccc21	0.930119
[truncated: 3,002 more rows]

## Sheet: Dataset_3
Infromation of 994 compounds from the positive dataset
SMILES	Category
CNC(=O)c1cc(Oc2ccc(NC(=O)Nc3ccc(Cl)c(C(F)(F)F)c3)c(F)c2)ccn1	train
CN(C)c1ccc(-c2nc(-c3nnc(-c4ccc(Cl)cc4)o3)nc3ccccc23)cc1	train
COc1ccc2cc3[n+](cc2c1OC)CCc1cc2c(cc1-3)OCO2	train
CN(C)CCCN=C(N)c1ccc(-c2cnc(-c3ccc(C(N)=NCCCN(C)C)cc3)o2)cc1	train
COC(=O)[C@@H]1[C@@H]2C[C@H]3c4[nH]c5ccccc5c4CC[N@+]3(C)C[C@H]2CC[C@@H]1O	train
CN1CCN(CCCn2cnc3c([nH]c4ccccc43)c2=O)CC1	train
c1cc(CCc2ccsc2)cc(-c2ccc(-c3cccc(CCc4ccsc4)c3)o2)c1	train
Nc1cccc(-c2nc3ccc([N+](=O)[O-])cc3[nH]2)c1	train
NCc1c[nH]c2nc(N)[nH]c(=O)c12	train
CN(C)CCCN=C(N)c1ccc(-c2ccc(-c3ccc(C(N)=NCCCN(C)C)cc3)o2)cc1	train
Cc1ncc(C[n+]2csc(CCOP(=O)(O)OP(=O)(O)O)c2C)c(O)n1	train
CCNC(=N)c1cccc(-c2ccc(-c3cccc(C(=N)NCC)c3)o2)c1	train
C=C[C@]1(C)C[C@@H](OC(=O)NC(=O)c2ccc(N)nn2)[C@]2(C)[C@H](C)C=C[C@]3(C[C@H](O)C(=O)[C@H]32)[C@@H](C)[C@@H]1O	train
O=C1Oc2ccccc2C(=O)/C1=C/N1C(=O)N/C(=C\c2ccccc2O)C1=O	train
CN1C(=O)C2NC=NC2N(C)C1=O	train
O=C(c1ccc(-n2nnc3cccnc32)cc1)N(c1ncccc1Cl)C1CCCNC1	train
COC(=O)c1cccc(Nc2nc(N)c3ccccc3n2)c1	train
Cc1ncc(C[n+]2cccc(CCO[P@@](=O)(O)P(=O)(O)O)c2)c(N)n1	train
Cc1cn2cc(-c3ncc4cc(N5CCN(C)CC5)ccc4n3)cc(F)c2n1	train
O=c1c(O)c(-c2cc(O)c(O)c(O)c2)oc2cc(O)cc(O)c12	train
O=C1c2c(O)ccc(O)c2C(=O)c2c(NCCNCCO)ccc(NCCNCCO)c21	train
Cc1ccc2nc(Nc3ccc4nc(NCCc5ccc(S(N)(=O)=O)cc5)sc4c3)nc(NCCCO)c2c1	train
CC[C@]1(C)C[C@@H](OC(=O)CS[C@H]2CCCN(C(=O)[C@@H](N)C(C)C)C2)[C@]2(C)[C@H](C)CC[C@]3(CCC(=O)[C@H]32)[C@@H](C)[C@@H]1O	train
Cc1ccc(COc2ccc3ccccc3c2CNC2CCN(C)CC2)cc1	train
CCN(CC)CC(=O)Nc1cccc2c1C(=O)c1c(c(O)c3ccccc3c1O)C2=O	train
NC(N)=Nc1ccc(NC(=O)c2ccc(C(=O)Nc3ccc(N=C(N)N)cc3)cc2)cc1	train
Cc1cccc(-c2nnc(-c3nc(NCCc4c(C)noc4C)c4ccccc4n3)o2)c1	train
NC(=O)NCCC[C@H](N)C(=O)O	train
N=C(N)Nc1ccc(OC(=O)c2ccc(NC(=N)N)cc2)cc1	train
O=C(c1cnc(C(=O)c2c[nH]c3cc(O)ccc23)[nH]1)c1c[nH]c2ccccc12	train
NC1=NC(=O)/C(=C\c2ccc3ccccc3c2)S1	train
CCOC(=O)[C@@H](N)CCCN=C(N)N	train
O=c1[nH]c(=O)c2nc[nH]c2[nH]1	train
c1cc(-c2ccc(-c3ccc(CCN4CCNCC4)cc3)o2)ccc1CCN1CCNCC1	train
Cc1nc(N)nc(N)n1	train
COC1CC2CCC(C)C(O)(O2)C(=O)C(=O)N2CCCCC2C(=O)OC(C(C)CC2CCC(O)C(OC)C2)CC(=O)C(C)C=C(C)C(O)C(OC)C(=O)C(C)CC(C)C=CC=CC=C1C	train
CN1CCOc2cc(Nc3nc(NCCCO)c4ccccc4n3)ccc21	train
CN(CCO)CC(O)Cn1cnc2c1c(=O)n(C)c(=O)n2C	train
C=C(NC(=O)C(=C)NC(=O)c1csc(C2=NC3c4csc(n4)C4NC(=O)c5csc(n5)C(C(C)(O)C(C)O)NC(=O)C5CSC(=N5)C(=CC)NC(=O)C(C(C)O)NC(=O)c5csc(n5)C3(CC2)NC(=O)C(C)NC(=O)C(=C)NC(=O)C(C)NC(=O)C(C(C)CC)NC2C=Cc3c(C(C)O)cc(nc3C2O)C(=O)OC4C)n1)C(N)=O	train
CN(C)CCCOc1ccc2nc(N)n(CCCN(C)C)c2c1	train
O=C1N[C@@H]2C(=C[C@H](O)[C@@H](O)[C@H]2O)c2cc3c(c(O)c21)OCO3	train
CN1CCN(CCCN2c3ccccc3Sc3ccc(C(F)(F)F)cc32)CC1	train
O=[N+]([O-])c1ccc2nc(CCCc3nc4ccc([N+](=O)[O-])cc4[nH]3)[nH]c2c1	train
CCN(CC)CCCNC(=N)c1cccc(-c2ccc(-c3cccc(C(=N)NCc4cccnc4)c3)s2)c1	train
Cc1ccc2c(N)c(-c3nnc(-c4cccc(C(F)(F)F)c4)o3)sc2n1	train
Cc1ccc2nc(Nc3ccc4nc(NCc5ccc6c(c5)OCO6)sc4c3)nc(NCCCO)c2c1	train
CC1OC(OC2C(O)C(O)C(O)C(O)C2O)C(N)CC1N=C(N)C(=O)O	train
CN(C)c1ccc2c(-c3ccc(C(=O)O)cc3C(=O)O)c3ccc(=[N+](C)C)cc-3oc2c1	train
Cc1cc2nc3c(=O)[nH]c(=O)nc-3n(CCC(C)c3ccc(F)cc3)c2cc1C	train
CC1c2cccc(O)c2C(O)=C2C(=O)C3(O)C(O)=C(C(N)=O)C(=O)C(N(C)C)C3CC21	train
c1ccc2[nH]c(C3CCNCC3)nc2c1	train
CC(O)c1cccc(Nc2nc(N(C)C)c3ccccc3n2)c1	train
NCCN(CCN)CCNC(=O)c1cccc2c(NCCCCNc3nc(N)nc(N)n3)c3ccccc3nc12	train
CC(C)Nc1ccc(-c2ccc(-c3ccc(NC(C)C)cc3)o2)cc1	train
NCCCC[C@H](NC(=O)[C@H](CCCCN)NC(=O)[C@@H](CN)NC(=O)c1cccc2c(Nc3ccc(CN)cc3)c3ccccc3nc12)C(=O)O	train
COc1cn2cc(-c3cc4ccc(N5CCNCC5)cc4oc3=O)nc2cn1	train
COC(=O)[C@H](CCCCN1CC(Cl)CC(C)(C)C1)N1CC(Cl)CC(C)(C)C1	train
Nc1ccccc1NCCOc1ccccc1	train
COc1cc2nc(N3CCN(C(=O)C4CC4)CC3)nc(N)c2cc1OC	train
O=c1[nH]cc([C@@H]2O[C@H](COP(=O)(O)O)[C@@H](O)[C@H]2O)c(=O)[nH]1	train
Cc1ccc2nc(Nc3ccc4nc(NC5CCN(Cc6ccccc6)CC5)sc4c3)nc(NCCCO)c2c1	train
CC(=O)c1ccc(C(=O)N[C@@H](CCCCN)C(=O)N2C[C@H](N)C[C@H](N)C2)cc1	train
CC1(C)CC(NCc2ccccc2O)CC(C)(C)N1	train
CC(=O)c1ccc(-c2cnc(NCc3cccc(C(C)=O)c3)n2C)cc1	train
O=P(O)(O)OCC1OC(O)C(O)C(O)C1O	train
CCC1=C(C)c2cc3c(CC)c(C)c(cc4nc(cc5[nH]c(cc1n2)c(C)c5CCC(=O)O)C(CCC(=O)O)=C4C)n3C	train
O=C(O)CCCCC1SCC2NC(=O)NC21	train
CCOc1ccc(NCC(O)Cn2c3ccc(Cl)cc3c3cc(Cl)ccc32)cc1	train
COc1ccc(Nc2nc(NCCCO)c3ccccc3n2)cc1	train
N=C1N[C@@H]2[C@H](CS[C@H]2CCCCC(=O)NCCOCCOCCNC(=O)CCCC[C@H]2SC[C@H]3NC(=N)N[C@@H]32)N1	train
CC(=O)N1CCC(c2nc3ccc([N+](=O)[O-])cc3[nH]2)CC1	train
CC(=O)NCCCNCCCNCCCNC(=O)c1cccc2c(NCCCCNc3nc(N)nc(N)n3)c3ccccc3nc12	train
O=C(O)C(Oc1ccc(-c2ccccc2)cc1)Oc1ccc(-c2ccccc2)cc1	train
OCCCNc1nc(Nc2ccc3c(c2)OCCO3)nc2c1CCCC2	train
Nc1ccc2cc3ccc(N)cc3nc2c1	train
Cc1ccc(-c2nnc(-c3nc(NCCCN4CCc5ccccc5C4)c4ccccc4n3)o2)cc1	train
C=CC[C@H](NC(=O)c1cc(CC)nc2ccccc12)C(=O)N1CCC[C@@H]1C(=O)N[C@H](Cc1ccccc1)C(=O)NCCCN	train
Nc1nc(N)c2c(N)c(N)ccc2n1	train
Cc1cc(C)c2nc(N)[nH]c2c1	train
Cn1nc(Nc2nc(NCCCO)c3ccccc3n2)c2ccccc21	train
NCCCCNCCCNC(=O)CNC(=O)CC(O)C(N)CCCC(NC(=O)C(CN)NC(=O)C(O)CNC(=O)CC(N)c1ccc(O)cc1)C(=O)O	train
COc1ccc(NCc2ccc([N+](=O)[O-])s2)cc1OC	train
NCCNc1ccccn1	train
NCCCC[C@H](N)C(=O)Nc1ccc2c(c1)C1c3cc(NC(=O)[C@@H](N)CCCCN)ccc3C2c2ccc(NC(=O)[C@@H](N)CCCCN)cc21	train
C=C(C)CC(=O)O[C@H]1C[C@@]2(COC(C)=O)[C@@H](C=C1C)O[C@@H]1[C@H](O)[C@@H](OC(C)=O)[C@@]2(C)[C@]12CO2	train
CN(C)CCCOc1ccc2nc3n(c2c1)CC(CN(C)C)CN3	train
COc1cc(C=CC(=O)CC(=O)C=Cc2ccc(O)c(OC)c2)ccc1O	train
O=C(Nc1ccc(C2=NCCN2)cc1)c1cc(C(=O)Nc2ccc(C3=NCCN3)cc2)cc(C(=O)Nc2ccc(C3=NCCN3)cc2)c1	train
Cc1nc2nc(NCCN)ccc2c(C)c1C	train
CN(C)c1ccc(Nc2nc(N3CCOCC3)c3ccccc3n2)cc1	train
O=c1cc2oc(-c3cc(O)c([O-])c(O)c3)c(O)cc-2c(O)c1	train
COc1ccc2c(c[n+](C)c3c4cc5c(cc4ccc23)OCO5)c1OC	train
CC(=O)NCC1CN(c2ccc(N3CCOCC3)c(F)c2)C(=O)O1	train
O=C(Nc1ccc(-c2nc3ccccc3[nH]2)cc1)c1ccc(-c2ccc(Cl)cc2)o1	train
COc1ccc2c(c1)[C@]1(C=C[C@H]3[C@H](O[C@H]4O[C@H](CO)[C@H](O)[C@@H](O)[C@@H]4N)c4cc5ccccc5cc4[C@@H]31)C(=O)C=C2	train
CC(=O)N[C@@H](CCCN=C(N)N)C(=O)O	train
C[C@@H]1CNC(c2ccc(NC(=O)Nc3ccc(C4=N[C@@H](C)CN4)cc3)cc2)=N1	train
CN1CCN(c2ccc3nc(-c4ccc5nc(-c6cccc(OCCCC(=O)NCCC/N=N/N)c6)[nH]c5c4)[nH]c3c2)CC1	train
Clc1ccc(-c2nnc(NCCN3CCCC3)c3ccccc23)cc1	train
c1ccc(Cc2cccc(-c3ccc(-c4cccc(Cc5ccccc5)c4)o3)c2)cc1	train
Cc1[nH]c2ccccc2c(=O)c1CN1CCCCCC1	train
N[C@@H]1C[C@H](N)[C@@H](O)[C@H](O)[C@H]1OCn1ccnn1	train
CC(=O)c1ccc(C(=O)N[C@@H](CCCNC(=N)N)C(=O)N2C[C@H](N)C[C@H](N)C2)cc1	train
N=C(N)c1ccc2cc(OC(=O)c3ccc(N=C(N)N)cc3)ccc2c1	train
CCN(CC)CCCN=C(N)c1cccc(-c2ccc(-c3cccc(C(N)=NCCCN(CC)CC)c3)s2)c1	train
Nc1ccn([C@@H]2O[C@H](COP(=O)(O)O)[C@H]3O[P@](=O)(O)O[C@H]32)c(=O)n1	train
c1ccc2sc(C3CCNCC3)nc2c1	train
OCCCNc1nc(Nc2ccc3c(c2)OCCO3)nc2ccccc12	train
CN1CCN(c2ccc3cc(-c4cccc(Cl)c4)c(=O)oc3c2)CC1	train
CN(C)c1ccc(Nc2nc(N(C)C)c3ccccc3n2)cc1	train
CN(C)C1C(=O)C(C#N)=C(O)C2(O)C(=O)C3=C(O)c4c(O)cccc4C(C)(O)C3CC12	train
CN(c1ccccc1)C1c2ccccc2N=C(NCCCNCCCCNCCCN)C1(C)C	train
C[C@H]1O[C@H](O[C@H]2[C@H](O)[C@@H](O)[C@@H](O)[C@H](O)[C@@H]2O)[C@@H](N)C[C@@H]1NC(=N)C(=O)O	train
NC(=O)c1ncn(-c2cccnc2)c1N	train
COc1ccc(Nc2nc(NCCO)c3ccccc3n2)cc1Cl	train
CN(C)CCOc1cc2c(c3ccccc13)-c1ccccc1C2=O	train
COc1ccc(CC2NCC(O)C2OC(C)=O)cc1	train
CN1CCc2nc(NC(=O)c3ccc(-c4ccccc4)cc3)sc2C1	train
Cc1c2cc[n+](C)cc2c(C)c2c1[nH]c1ccc(O)cc12	train
Cn1cnc2ccc(Nc3nc(NCCCO)c4ccccc4n3)cc21	train
Cc1nccc2c1[nH]c1cc(OCCN(C)C)ccc12	train
CN1CCC(=C2c3ccccc3C=Cc3ccccc32)CC1	train
N=C(N)CCCOc1ccccc1-c1ccccc1	train
CN(C)CCCN1c2ccccc2Sc2ccc(C(F)(F)F)cc21	train
CCN(CC)CCC(=O)Nc1cccc(-c2cn(-c3ccc4cc5ccc(-n6cc(-c7cccc(NC(=O)CCN(CC)CC)c7)nn6)cc5nc4c3)nn2)c1	train
CC1=CC(O)CC(=O)Cc2nc(co2)C(=O)N2CCC=C2C(=O)OC(C(C)C)C(C)C=CC(=O)NCC=C1	train
CN(CC(=O)O)C(=N)N	train
N[C@@H]1C[C@@H](N)CN(c2nc(NC3CCNC3)nc(N3C[C@H](N)C[C@H](N)C3)n2)C1	train
Clc1ccc2c(c1)N(CCN1CCCC1)c1ccccc1S2	train
Nc1nc2[nH]nc(N)[n+]2[nH]1	train
CC(C)OC(=O)c1ccc(Nc2nc3ccccc3c3nncn23)cc1	train
CN1CCN(c2ccc(-c3ccc4[nH]c(-c5cc(C(C)(C)C)c(OCCCC(=O)NCCCN=[N+]=[N-])c(C(C)(C)C)c5)nc4c3)cc2)CC1	train
CSc1ccc(/C=C/c2ccc3nc4c(oc5ccccc54)c(NCCN4CCCC4)c3c2)cc1	train
N[C@@H]1C[C@@H](N)[C@@H](OCCCc2cn(Cc3cccc(Cn4cc(CCCO[C@@H]5[C@H](O)[C@H](O)[C@@H](N)C[C@H]5N)nn4)c3)nn2)[C@H](O)[C@H]1O	train
CNc1cc(C)c2ccccc2n1	train
CO[C@H]1CCCN(CCCCN2c3ccccc3Sc3ccc(C(C)=O)cc32)C1	train
N[C@H]1CC[C@@H](c2nc3ccc([N+](=O)[O-])cc3[nH]2)C1	train
Nc1nc2c(ncn2C2OC(COP(=O)(O)O)CC2O)c(=O)[nH]1	train
CN[C@H]1[C@H](O[C@H]2c3cc4c(cc3[C@@H]3[C@H]2OC(=O)[C@@]32C(=O)C=Cc3c(C)cc(OC)cc32)[C@@](O)([C@@H]2COC(=O)O2)C=C4)O[C@H](C)[C@H](O)[C@H]1O	train
CCN(CC)CCCC(C)Nc1c2ccc(Cl)cc2nc2ccc(OC)cc12	train
CN(C)c1ncnc2c1ncn2CCn1cnc2c(N(C)C)ncnc21	train
CN(C)c1nc(N)c(C(=O)NC(=N)N)nc1C#Cc1ccccc1	train
O=C(Nc1ccc(-c2nc3ccc(NC(=O)c4ccco4)cc3[nH]2)cc1)c1ccco1	train
Nc1cc2c(=O)c(C(=O)O)cn(CCc3ccccn3)c2nc1N1CCN(c2nc3ccccc3s2)CC1	train
NC(=O)C1=CN(C2OC(COP(=O)(O)OP(=O)(O)OCC3OC(n4cnc5c(N)ncnc54)C(O)C3O)C(O)C2O)C=CC1	train
Nc1ccc(-c2nc3ccc([N+](=O)[O-])cc3[nH]2)cc1	train
C[C@H](N)C(=O)N[C@@H]1[C@H]2C(=C(O)C[C@@H](C)[C@@H]2O)C(=O)O[C@]1(C)C(Cl)Cl	train
CNc1ncc(CN2CCC[C@@H](c3nc(O)cc(-c4cccs4)n3)C2)cn1	train
Cc1ccc(OC(=O)Cn2c(C3CCNCC3)nc3cc(Cl)c(Cl)cc32)cc1	train
O=C1c2ccccc2C(=O)[C@@H]2C(NCCO)=CC=C(NCCO)[C@@H]12	train
CC(C)N=C(N)c1cccc(-c2ccc(-c3cccc(C(N)=NC(C)C)c3)o2)c1	train
Nc1ccn(C2OC(COP(=O)(O)O)C(O)C2O)c(=O)n1	train
NC1C(O)OC(COP(=O)([O-])[O-])C(O)C1O	train
COc1nc(N)nc2nc[nH]c12	train
CCC1OC(=O)C(C)C(OC2CC(C)(OC)C(O)C(C)O2)C(C)C(OC2OC(C)CC(N(C)C)C2O)C(C)(O)CC(C)CN(C)C(C)C(O)C1(C)O	train
N[C@H]1CCC[C@@H](c2nc3cc([N+](=O)[O-])ccc3[nH]2)C1	train
CN(C)c1nc(Nc2ccc3c(c2)OCCO3)nc2ccccc12	train
N[C@@H](Cc1ccccc1)C(=O)O	train
Nc1ccc(-c2cc3ccc(C4=NCCN4)cc3[nH]2)cc1	train
NCc1ccc2nccnc2c1	train
Cc1cc2nc3c(=O)[nH]c(=O)nc-3n(CCCc3ccccc3)c2cc1C	train
COC1C(O)CC(=O)OC(C)CC=CC=CC(O)C(C)CC(CC=O)C1OC1OC(C)C(OC2CC(C)(C)C(O)C(C)O2)C(N(C)C)C1O	train
CC(=O)c1ccc2c(c1)N(CCCN(C)C)c1ccccc1S2	train
CCN1CCN(CCC(=O)Nc2ccc(Br)c(C)c2)CC1	train
CN(c1ccc(-c2ccc(F)cc2O)nn1)C1CC(C)(C)NC(C)(C)C1	train
O=[N+]([O-])c1cc(-c2nc3cc(Cl)c([N+](=O)[O-])cc3[nH]2)ccc1Cl	train
Cc1ccc(OCc2ccc(C(F)(F)F)cc2)c(CNC2CCN(C)CC2)c1	train
CN1CCN(c2ccc3nc(C4C(=O)Nc5cccc(F)c5C4N)[nH]c3c2)CC1	train
CCOc1ccc(C=C(C)[N+](=O)[O-])cc1OC	train
CN(C)c1nc(N)c(C(=O)N=C(N)N)nc1Cl	train
CN(C)C1C(O)=C(C(N)=O)C(=O)C2(O)C(O)=C3C(=O)c4c(O)cccc4C(C)(O)C3CC12	train
COc1ccc(CN2CCCN(C)CC2)c(OC)c1	train
C[n+]1c(-c2ccc(NCCCNC(=O)CN(CCN(CC(=O)[O-])CC(=O)O)CC(=O)O)cc2)c2cc(N)ccc2c2ccc(N)cc21	train
O=C1Nc2ccc(Cl)cc2[C@@](C#CC2CC2)(C(F)(F)F)O1	train
COc1ccc(N2C(=O)O[C@H](COC(=O)Cc3ccccc3)[C@H]2Cc2ccccc2)cc1	train
COc1cc2ncnc(N3CCN(CCCCO)CC3)c2cc1OC	train
CN1C2=Nc3n(c4ccccc4[n+]3C)CN2c2ccccc21	train
Cc1nc2ccc(Nc3nc(NCCCO)c4ccccc4n3)cc2o1	train
Nc1nc2ccccc2[nH]1	train
CCN(CC)[C@@H]1C(O)=C(C(N)=O)C(=O)[C@@]2(O)C(O)=C3C(=O)c4c(O)cc([C@@H]5CCCN5)c(C(F)(F)F)c4C[C@H]3C[C@@H]12	train
O=[N+]([O-])c1ccc2nc(-c3cccnc3)[nH]c2c1	train
CN(C)CCCCNCc1cc(-c2cc3ccccc3s2)ccc1OCCCN	train
NC/C=C/CC(N)C(=O)[O-]	train
C1=CCc2c(c3c(c4ccccc24)=N[Rh]24(<-n5cccc6ccc7cccn->2c7c65)(<-n2cccc5ccc6cccn->4c6c52)N=3)C=1	train
Nc1ncnc2c1ncn2[C@@H]1O[C@H](CO)C[C@H]1O	train
NC(N)=NOCC[C@H](N)C(=O)O	train
CN(C)CCCn1c(N)nc2ccccc21	train
CN1CCN(c2ccc3cc(-c4ccccc4Cl)c(=O)oc3c2)CC1	train
CN(C)c1cc(N)c2ccccc2n1	train
CN1C=CC(=Cc2sc3ccccc3[n+]2CC(=O)NCc2ccccc2F)c2ccccc21	train
CN(C)CCOc1ccc2[nH]c3ccccc3c2c1	train
CSCC[C@H](NC=O)C(=O)O	train
Cc1cc(-c2nc3cc4[nH]c(=O)[nH]c4cc3[nH]2)ccc1O	train
NC(N)=NC(=O)O	train
NCCCOc1ccc(-c2ccc3occc(=O)c3c2)cc1CNCCC1CCNCC1	train
Cc1cn(C2OC3(CO)COC2C3O)c(=O)nc1N	train
CNCc1ccc2nccnc2c1	train
CN1/C(=C/c2sc3ccccc3[n+]2CCCS(=O)(=O)O)Oc2ccccc21	train
N=C(NCCCCNc1nc(N)nc(N)n1)c1ccc(C(=N)NCCCCNc2nc(N)nc(N)n2)cc1	train
NC(=O)c1ncn(C2OC(CO)C(O)C2O)c1N	train
Nc1csc2nccnc12	train
COCCn1cncc1CNC(=O)Nc1ccc2cnn(C)c2c1	train
CC(C)C[C@H](NC(=O)[C@@H](O)[C@@H](O)[C@@H](N)CC(N)=O)[C@@H]1Cc2cccc(O)c2C(=O)O1	train
NC(=O)C(N)CC[Se]CC1OC(n2cnc3c(N)nc(N)nc32)C(O)C1O	train
Cc1n[nH]c2nc(Nc3ccc4c(c3)OCCO4)nc(NCCCO)c12	train
Nc1ncnc2c1ncn2C1OC(COP(=O)(O)OP(=O)(O)OP(=O)(O)O)CC1O	train
Cc1cccnc1NCCN	train
CN(C)CC1CNc2nc3ccc4c(c3n2C1)CC(CN(C)C)O4	train
O=c1cc(-c2cccs2)nc([C@H]2CCCN(Cc3cn(-c4ncccn4)cn3)C2)[nH]1	train
N=C(N)c1ccc(NC(=O)c2ccc(C(=O)Nc3ccc(C(=N)N)cc3)cc2)cc1	train
CC(N)=NCCCC[C@H](N)C(=O)[O-]	train
CN1CCN(CCc2ccccc2-c2ccc(-c3ccccc3CCN3CCN(C)CC3)o2)CC1	train
N=C(N)NC(=O)c1nc(-c2ccccc2)c(N2CCC(c3ccccc3)CC2)nc1N	train
CCCSCCCNc1nc(-c2nnc(-c3ccccc3)o2)nc2ccccc12	train
NCCCC(=O)NCCCN1Cc2ccc3ccc(nc3n2)NC(=O)OCC/C=C/CCOC(=O)Nc2ccc3ccc(nc3n2)C1	train
CCN(CC)CCNc1ccc(CO)c2oc3ccccc3c(=O)c12	train
CC(=O)Nc1cccc(NC(=O)c2csc(NC(=O)c3ccc(Cl)cc3)n2)c1	train
Cc1cc2ccccc2nc1-c1ccccc1F	train
N=C(N)c1cc(Cl)c(OCc2ccccc2)c(Cl)c1	train
CC1(C)CC(Oc2ccc(-c3ccc(-c4cn[nH]c4)cc3O)nn2)CC(C)(C)N1	train
Cn1nnc(-c2ccc(-c3ccc(N4C[C@H](CO)OC4=O)cc3F)cn2)n1	train
CC(=O)Nc1ccc(Nc2nc(N3CCCC3)c3ccccc3n2)cc1	train
CN(C)[C@@H]1C(=O)C(C(N)=O)=C(O)[C@@]2(O)C(=O)C3=C(O)c4c(O)c(NC(=O)CN5CCCC5)cc(F)c4C[C@H]3C[C@@H]12	train
O=C(/C=C/C=C/c1ccc2c(c1)OCO2)N1CCCCC1	train
COc1cc2c(Nc3ccc(O)c(CN4CCN(C)CC4)c3)c3ccc(Cl)cc3nc2cc1C	train
CO[C@@H]1C=C[C@@]23c4cc5c(cc4C[N@@](C[C@@H]2O)[C@H]3C1)OCO5	train
CC/C=C/[C@@H](OC(N)=O)[C@@H](Cl)[C@H](O)CC(=O)[C@@H](O)[C@H](O)[C@H](C)/C(Cl)=C/C=C/C=C(C)/C=C/C=C/C(=O)O[C@@H]1C[C@@H](C(=O)O)CC[C@@H]1O	train
CN1(C)CCN(C)(C)->[Pt]<-1(Cl)CCNc1ccc2cc3ccc(NCC[Pt]4(Cl)<-N(C)(C)CCN->4(C)C)cc3nc2c1	train
CN(C)C[C@H]1COc2ccc3nc4n(c3c2C1)C[C@H](CN(C)C)CN4	train
CN1CCN(c2cc(C=Cc3cc4ccccc4[nH]3)[n+](C)c3ccccc23)CC1	train
CN(C)c1nc(Nc2ccc(C(N)=O)cc2)nc2ccccc12	train
CN(C)CCCN1c2ccccc2Sc2c(O)cccc21	train
Cn1c(C2CCNCC2)nc2cc(Cl)c(Cl)cc21	train
Cc1cccn2c(=O)c3cc(C(=O)N4CCN(C)CC4)c(=N)n(C[C@H]4CCCO4)c3nc12	train
Cn1nc(CN2CCCCC(N)C2)c2c(Cl)cccc21	train
CC1=NC(=Cc2cc(F)c(O)c(F)c2)C(=O)N1CC(F)(F)F	train
Fc1c(F)c(F)c(Cn2c(C3CCNCC3)nc3cc(Cl)c(Cl)cc32)c(F)c1F	train
CC(=O)c1c(O)c(C)c(O)c2c1OC1=CC(=O)C(C(C)=O)C(=O)C12C	train
c1ccc2c(NCc3cn(CCCN4CCCCC4)nn3)c3oc4ccccc4c3nc2c1	train
c1ccc2sc(COc3ccc(-c4cc5ccccc5s4)cc3CNCCCN3CCNCC3)cc2c1	train
NCCOC[C@H](N)C(=O)O	train
NCCS(=O)(=O)C[C@H](N)C(=O)[O-]	train
Nc1ncc2nc[nH]c2n1	train
Cc1c(-c2cccc(Cl)c2)c(=O)oc2cc(N3CCN(C)CC3)ccc12	train
Cc1cn2nc(-c3cc(=O)n4cc(N5CCNC6(CC6)C5)ccc4n3)cc(C)c2n1	train
CCN1CCN(c2cc3c(cc2F)c(=O)c(C(=O)NCCCN(C)C)cn3C2CC2)CC1	train
Cc1cccn2c(=O)c3cc(C(=O)N[C@@H](C)c4ccccc4)c(=N)n(CCOCCO)c3nc12	train
Cc1nc2sccn2c1C(=O)N1CCC(c2ccc(CN3CC(O)C3)cc2)CC1	train
FC(F)(F)c1ccc(NCc2nc3ccccc3[nH]2)cc1	train
CCN(CC)c1ccc(-c2sc3cc(C)ccc3[n+]2C)cc1	train
O[C@H]1[C@H]2c3cc4c(cc3CN3CCC(=C[C@@H]1O)[C@H]23)OCO4	train
CN=C(N)N/N=C(/C)c1ccc2sc3ccc(/C(C)=N/NC(N)=NC)cc3c2c1	train
NCCCNCCO[C@H]1[C@@H](O)[C@@H](OCSc2ccnc3cc(C(F)(F)F)ccc23)[C@H](N)C[C@@H]1N	train
CCOc1cc(-c2nc3ccc(-n4cnnn4)cc3[nH]2)ccc1O	train
Cc1c(Cl)cccc1NCC(O)Cn1c2ccc(Br)cc2c2cc(Br)ccc21	train
C#Cc1ccc(-c2nnc(NC(=O)c3ccc(N)cc3)o2)cc1	train
C=CC1(C)CC(OC(=O)CSC(C)(C)CNC(=O)C(N)C(C)C)C2(C)C(C)CCC3(CCC(=O)C32)C(C)C1O	train
CC1=C2N=C(C=C3N=C(C(C)=C4[N-]C(C(CC(N)=O)C4(C)CCC(=O)NCC(C)OP(=O)([O-])OC4C(CO)OC(n5cnc6cc(C)c(C)cc65)C4O)C4(C)N=C1C(CCC(N)=O)C4(C)CC(N)=O)C(CCC(N)=O)C3(C)C)C(CCC(N)=O)C2(C)CC(N)=O	train
Cc1cc(N(C)C)nc2cc(N)ccc12	train
N#Cc1c[nH]c2nc(N)[nH]c(=O)c12	train
C(=Nc1ccc(Cc2ccc(N=Cc3ccccn3)cc2)cc1)c1ccccn1	train
Cc1cnc2c(-c3ccc(C(=O)N(c4ncccc4C)C4CCCNC4)cc3F)cnn2c1	train
O=C(Cc1ccccc1)OC[C@H]1OC(=O)N[C@@H]1Cc1ccccc1	train
OC(CNc1ccccc1)Cn1c2ccccc2c2ccccc21	train
CC(=O)c1ccc2c(c1)N(CCCN1CCC[C@@H](CO)C1)c1ccccc1S2	train
CCOc1ccc(NCC(O)Cn2c3ccc(Br)cc3c3cc(Br)ccc32)cc1Cl	train
N[C@@H]1C[C@H](N)[C@@]2(CC[C@@H](Cn3cc(COCc4ccccc4)nn3)O2)[C@H](O)[C@H]1O	train
Cn1cnc2c1c(=O)[nH]c(=O)n2C	train
CCN1CCN(Cc2ccc(Nc3ncc(F)c(-c4cc(F)c5nc(C)n(C(C)C)c5c4)n3)nc2)CC1	train
Cc1ccc2nc(C3CCNCC3)[nH]c2c1	train
Nc1nc(N2C[C@H](N)C[C@@H](N)C2)nc(N2C[C@H](N)C[C@H](N)C2)n1	train
CN(c1ccc(-c2ccc(C#N)cc2O)nn1)C1CC(C)(C)NC(C)(C)C1	train
Nc1nc(F)nc2nc[nH]c12	train
Cc1ccc2ccc(NC(=O)CCNCCNCCC(=O)Nc3ccc4ccc(C)nc4n3)nc2n1	train
CN(C)c1nc(N)c(C(=O)CC(=N)N)nc1-c1ccc(-c2ccccc2)cc1	train
CC(C)(C)CC(C)(C)NCC(=O)Nc1ccnc2ccccc12	train
OCCCNc1nc(Nc2ccc3c(c2)OC(F)(F)O3)nc2ccccc12	train
c1ccc2c(c1)CCOC2CNCCCN1CCCCC1	train
OC(CNc1ccccc1)Cn1c2ccc(Br)cc2c2cc(Br)ccc21	train
c1cc(C2=NCCN2)ccc1Nc1ccc(-c2cc3ccc(C4=NCCN4)cc3[nH]2)cc1	train
CN(C)CCNc1cc(-c2ccccc2)nc2ccccc12	train
CC1CCN(c2ccc(N)cc2)CC1	train
Cc1ncc(C[n+]2csc(CCO)c2C)c(N)n1	train
Clc1ccc2scc(Cn3c(C4CCNCC4)nc4cc(Cl)c(Cl)cc43)c2c1	train
NC(=O)c1ccc[n+](C2OC(CO)C(O)C2O)c1	train
c1coc(CNc2nc(N3CCOCC3)c3[nH]c(NCc4ccco4)nc3n2)c1	train
Nc1cc(N)nc(N)n1	train
NC(=O)c1cnc2ccccc2c1	train
CN1CCN(c2cc(F)c3cc(-c4cccc(Cl)c4)c(=O)oc3c2)CC1	train
CNc1cncc(-c2ccc(C(=O)N(c3ncccc3Cl)C3CCCNC3)cc2)n1	train
CN(C)CCCN1c2ccccc2Sc2ccc(O)cc21	train
O=P(O)(O)OCC1OC(OP(=O)(O)OP(=O)(O)O)C(O)C1O	train
CCN(CC)CCCNC(=N)c1cccc(-c2ccc(-c3cccc(C(=N)NCCCN(CC)CC)c3)o2)c1	train
O=c1[nH]c(NC2CCCCC2)nc2nc[nH]c12	train
O=C(O)c1cn(C2CC2)c2cc(N3CCC(O)(COc4ccc(N5C[C@H](CO)OC5=O)cc4F)CC3)c(F)cc2c1=O	train
Cc1cc(N(C)C)nc2cc(NC(=O)Cc3ccncc3)ccc12	train
COc1cc2c(cc1OC)-c1cc3cc(OC)c(OC)cc3c[n+]1CC2	train
CCCN(CC(N)=O)C(=O)CN(CCC)C(=O)CN(CCC)C(=O)CN(CCC)C(=O)CN(CCC)C(=O)CNCc1cn(N=[N+]=N)nn1	train
CN(C)c1ccc(Nc2nc(NCCCO)c3ccccc3n2)cc1	train
Cc1cc(C(=O)NCCN(Cc2ccncc2)C(=O)CCCOc2ccc(-c3nc4ccc(-c5ccc(N6CCN(C)CC6)cc5)cc4[nH]3)cc2)ccc1F	train
N=C(N)NC(=O)c1nc(-c2ccc(-c3ccccc3)cc2)c(N2CCCC2)nc1N	train
O=C(N/N=C\c1ccc(Br)cc1)c1cc[n+](Cc2ccccc2)cc1	train
FC(F)(F)c1ccc2nc(C3CCNCC3)[nH]c2c1	train
COc1ncc(CN2CCC[C@H](c3nc(=O)cc(-c4cccs4)[nH]3)C2)cn1	train
Oc1cc(-n2cccn2)ccc1-c1ccc(OC2CCNCC2)nn1	train
NCCCC[C@H](N)C(=O)O	train
CN(C)CCCn1c(N)nc2ccc3oc(CN(C)C)cc3c21	train
CN(C)c1cc(NC(=O)CNC(C)(C)C)c(O)c2c1CC1CC3C(N(C)C)C(=O)C(C(N)=O)=C(O)C3(O)C(=O)C1=C2O	train
N=[N+]=NCCCNC(=N)c1ccc(-c2ccc(-c3ccc(C(=N)N)cc3)o2)cc1	train
c1ccc(CN2CCC(c3ccccc3-c3ccc(-c4ccccc4C4CCN(Cc5ccccc5)CC4)o3)CC2)cc1	train
CC(=S)NC[C@@H]1CN(c2ccc(N3CCS(=O)CC3)c(F)c2)C(=O)O1	train
C=CCNc1nc(Nc2ccc(O)cc2)nc2ccccc12	train
O=C(NCCN1CCOCC1)C1CCN(Cc2cccc3ccccc23)CC1	train
Oc1ccc(-c2nc3ccc(-c4ccc5nc(-c6ccc(O)cc6)[nH]c5c4)cc3[nH]2)cc1	train
CN(c1ccc(-c2ccc(-n3ccc(N)n3)cc2O)nn1)C1CC(C)(C)NC(C)(C)C1	train
CCc1nc2sc(C(=O)Nc3cccc(C(F)(F)F)c3)c(N)c2cc1C	train
COc1ccc(OCCNC(=N)N)c(CNCCCCCNC(=N)N)c1	train
COc1ccc(OCCCN)c(CNC(=O)CCCNC(=N)N)c1	train
c1cc(C2=NCCN2)ccc1Oc1ccc(-c2cc3ccc(C4=NCCN4)cc3[nH]2)cc1	train
Nc1nc(Cl)c2nc[nH]c2n1	train
Nc1nc(O)c2[nH]nnc2n1	train
Nc1ncnc2c1ncn2[C@@H]1O[C@H](CN(CCO)CC[C@H](N)C(=O)[O-])[C@@H](O)[C@H]1O	train
CN1CCN(c2cc(C=Cc3ccc(N4CCOCC4)cc3)[n+](C)c3ccccc23)CC1	train
COc1ccccc1-c1coc2c(CN3CCCCC3)c(O)ccc2c1=O	train
N=C(N)NC(=O)c1nc(-c2cnc(N3CCN(c4ccccn4)CC3)nc2)c(NCCC2=NCc3ccccc32)nc1N	train
c1ccc(CCc2ccc(-c3ccc(-c4ccc(CCc5ccccc5)cc4)o3)cc2)cc1	train
OCCNCCCN1c2ccccc2Sc2ccc(Cl)cc21	train
CN(c1ccc(-c2ccc(-n3cccn3)cc2O)nn1)C1CC(C)(C)NC(C)(C)C1	train
CCN1CCN(c2ccc3cc(-c4cn5cc(C)nc(C)c5n4)c(=O)oc3c2)C[C@@H]1C	train
CC(=O)NC[C@H]1CN(c2ccc(-c3cncs3)cc2)C(=O)O1	train
CN(C)C[C@@H]1CNC2=Nc3ccc4c(c3[C@@H]2C1)C[C@@H](CN(C)C)CO4	train
CC1(O)c2cccc(O)c2C(O)=C2C(=O)C3(O)C(O)=C(C(N)=O)C(=O)CC3CC21	train
CN(C)c1nc(Nc2cccc(O)c2)nc2ccccc12	train
NC[C@@H](CO[C@@H]1O[C@H](CN)[C@H](O)[C@@H](O)[C@H]1N)OCc1ccc(-c2ccccc2)cc1	train
N[C@@H]1C[C@H](N)[C@@H](O)[C@H](O)[C@H]1OCn1ccnc1	train
CC(=O)c1cccc(Nc2nc(NCCCO)c3ccccc3n2)c1	train
NC(=O)N=C(N)N	train
Cc1cc2nc[nH]c2cc1C	train
Cc1ncc(C[n+]2csc(CCOP(=O)(O)CP(=O)(O)O)c2C)c(N)n1	train
Clc1cc2nc(C3CCNCC3)n(Cc3ccc(I)cc3)c2cc1Cl	train
Cc1ccc2c(c1)Sc1cc(C)ccc1N2CCCN(C)C	train
NC(=O)c1ccc[n+](C2OC(COP(=O)([O-])O)C(O)C2O)c1	train
Cc1nccc2c1[nH]c1ccccc12	train
COc1ccc(Nc2nc(N3C[C@H](N)C[C@@H](N)C3)nc(N3C[C@H](N)C[C@H](N)C3)n2)cc1	train
COC(=O)c1c(-c2ccc(C(=O)N(c3ncccc3C)C3CCCNC3)cc2)cnn1C	train
O=C1Nc2ccc3ccc(nc3n2)CNCc2ccc3ccc(nc3n2)NC(=O)OCCC=CCCO1	train
Nc1nc2c(ncn2C2OCC(OP(=O)(O)n3cc[n+](P(=O)(O)OC4COC(n5cnc6c(=O)[nH]c(N)nc65)C4O)c3N)C2O)c(=O)[nH]1	train
N=C(N)NC(=O)c1nc(-c2ccccc2)c(NCCc2nc3ccccc3[nH]2)nc1N	train
COc1ccc(NC(=O)CCCOc2ccc(-c3nc4ccc(-c5ccc(N6CCN(C)CC6)cc5)cc4[nH]3)cc2)cc1OCC1=NC2C=CC=CN2C1	train
CC(C)CC(NC(=O)C(CCC(N)=O)NC(=O)C1CCCN1C(=O)C(N)CCCCN)C(=O)NC(Cc1c[nH]c2ccccc12)C(=O)N1CCCC1C(=O)O	train
C=C/C(=C1\CNN=C1N)c1ccc(NC(=O)Nc2cc(C)ccc2F)cc1	train
OCCCNc1nc(Nc2cccc(F)c2)nc2ccccc12	train
Nc1ccn([C@@H]2O[C@H](CO)[C@@H](O)[C@H]2O)c(=O)n1	train
CN1CCN(CCCNc2nc3cc([N+](=O)O)ccc3nc2NCCCc2ccc(NC(=O)/C=C/c3ccc(N(C)C)cc3)cc2)CC1	train
Clc1ccc2c(c1)N(CCNCc1ccccc1)c1ccccc1S2	train
CNc1nc(Nc2cc(C)ccc2O)nc2ccccc12	train
Cc1ccnc(NCCN)c1	train
CN(C)CCOc1ccc2oc3ccccc3c2c1	train
CC(=O)c1ccc(NC(=O)OC[C@H]2OC(=O)N[C@@H]2CN2CCN(c3ccccc3)CC2)cc1	train
Cc1cccn2c(=O)c3cc(C(=O)NCCN4CCOCC4)c(=N)n(Cc4cccnc4)c3nc12	train
NCCOCCOCCOCCNC(=O)Cn1cc2c(nc1=O)Nc1c(OCCN)cccc1O2	train
CN(C)C1C(=O)C(C(N)=O)=C(O)C2(O)C(=O)C3=C(O)c4c(O)cccc4C(C)(O)C3C(O)C12	train
CC(=O)C1(O)Cc2c(O)c3c(c(O)c2C(OC2CC(N)C(O)C(C)O2)C1)C(=O)c1ccccc1C3=O	train
Cc1cc2nc(N)[nH]c2cc1C	train
COc1cc(CCN)c(-c2cc(C)c(-c3cc(CCN)c(O)c(CCN)c3)c(C)c2)c(CCN)c1	train
Cc1c2ccncc2c(C)c2c1[nH]c1ccc(OCCN(C)C)cc12	train
CCCCOC(=O)c1ccc(N)cc1	train
Nc1cccc(-c2nc3ccc(-c4ccc5nc(-c6cccc(N)c6)[nH]c5c4)cc3[nH]2)c1	train
C=CC1(C)CC(OC(=O)CSC2CC3CCC(C2)N3C)C2(C)C(C)CCC3(CCC(=O)C32)C(C)C1O	train
CCCCC(=O)OCCOCCC[C@H](O)CC	train
CCCC1CC(C(=O)NC(C(C)Cl)C2OC(SC)C(O)C(O)C2O)N(C)C1	train
O=C(NCCN1CCOCC1)C1CCN(Cc2ccc(Cl)cc2)CC1	train
Nc1ncnc2c1ncn2C1OC2COP(=O)(O)OC3C(COP(=O)(O)OC2C1O)OC(n1cnc2c(N)ncnc21)C3O	train
Cc1ccccc1NCC(O)CN(c1ccc(Br)cc1)c1ccc(Br)cc1	train
CC(=O)Nc1cccc(Nc2nc(N(C)C)c3ccccc3n2)c1	train
CN(C)CCN1C(=O)c2cccc3cc(NC(N)=O)cc(c23)C1=O	train
CN(C)CCOc1nc2c(c(=O)n(C)c(=O)n2C)n1C	train
OC(CNc1ccc(N2CCOCC2)cc1)Cn1c2ccc(Br)cc2c2cc(Br)ccc21	train
Cn1c(-c2ccc(OCCCN3CCCCC3)c(N)c2)cc(=O)c2ccccc21	train
Cc1cccc(-c2nnc(-c3nc(NCCc4cnc[nH]4)c4ccccc4n3)o2)c1	train
c1cncc(CCc2cccc(-c3ccc(-c4cccc(CCc5cccnc5)c4)o3)c2)c1	train
Fc1ccc(-c2nnc(-c3nc(NC4CCCCC4)c4ccccc4n3)o2)cc1	train
Nc1nc(N)c(N)c(=O)[nH]1	train
CN(C)CCN=C(N)c1cccc(-c2ccc(-c3cccc(C(N)=NCCN(C)C)c3)o2)c1	train
Cc1ccc2[nH]c(N)nc2c1C	train
CCc1cc2c(=O)c(-c3nc4ccccc4[nH]3)coc2c(CN2CCOCC2)c1O	train
Cc1nc(NC(=O)Nc2sc(=S)n(C)c2C)sc1C(=O)Nc1ccccc1	train
COC1C(OC(C)=O)CC(=O)OC(C)CC=CC=CC(O)C(C)CC(CC=O)C1OC1OC(C)C(OC2CC(C)(O)C(OC(=O)CC(C)C)C(C)O2)C(N(C)C)C1O	train
CC(=O)NC[C@H]1CN(c2ccc(/C=C/CCCNC(=O)C/C=C3\C(=O)NC(=O)N=C3C)c(F)c2)C(=O)O1	train
c1ccc(CN2CCC(c3ccc(-c4ccc(-c5ccc(C6CCN(Cc7ccccc7)CC6)cc5)o4)cc3)CC2)cc1	train
C[S+](CCC(N)C(=O)[O-])CC1OC(n2cnc3c(N)ncnc32)C(O)C1O	train
CC1=N/C(=C\c2cccc(Br)c2)C(=O)N1C	train
O=C(O)C1CCc2nc(NCc3ccccc3)nc(NCc3ccccc3)c2C1	train
CC(C)c1ccc2nc3ccc(C(=O)NCCN(C)C)cn3c(=O)c2c1	train
CCCC[C@H]1CCCCCCc2[nH]c(/C=C3\N=CC(c4ccc[nH]4)=C3OC)cc21	train
COC(=O)Cn1c(C2CCNCC2)nc2cc(Cl)c(Cl)cc21	train
O=C(NC(CO)C(O)c1ccc([N+](=O)[O-])cc1)C(Cl)Cl	train
CN(C)c1ccc2c(-c3cc(C(=O)O)ccc3C(=O)NS(=O)(=O)N(C)C)c3ccc(=[N+](C)C)cc-3oc2c1	train
NCCCCN=C(N)N	train
O=C1OC2(c3ccc(O)cc3Oc3cc(O)ccc32)c2ccc(N=C=S)cc21	train
CN(CCO)c1ccc(C=C(C#N)c2ccc(C#N)cc2)cc1	train
COc1cc2nc(N3CCCN(C)CC3)nc(NC3CCN(Cc4ccccc4)CC3)c2cc1OC	train
Cc1ncc(CN(C=O)C(C)C(CCOP(=O)(O)O)SC(=O)c2ccccc2)c(N)n1	train
Cc1cc(/C=C/c2ccc3cc(N(C)C)ccc3[n+]2C)c(C)n1-c1ccccc1	train
Nc1nc2[nH]c(N)nc2c(=O)[nH]1	train
CC[C@H]1NC(=O)[C@@H](NC(=O)c2ncccc2O)[C@@H](C)OC(=O)[C@H](c2ccccc2)NC(=O)[C@@H]2CC(=O)CCN2C(=O)[C@H](Cc2ccc(N(C)C)cc2)N(C)C(=O)[C@@H]2CCCN2C1=O	train
CNC1C(O)C(NC)C2OC3(O)C(=O)CC(C)OC3OC2C1O	train
Nc1ccc2ccccc2n1	train
CN=C(N)c1ccc(NC(=O)c2ccc(C(=O)Nc3ccc(C(N)=NC)cc3)cc2)cc1	train
Cc1c2cc[n+](CCN3CCCCC3)cc2c(C)c2c1[nH]c1ccc(O)cc12	train
Cn1c(=O)cnc2c(N)nc(=O)[nH]c21	train
NCCC(O)C(=O)O	train
NCC1CCC(N)C(OC2C(CO)OC(OC3C(O)C(NC(=O)C(O)C(F)CN)CC(N)C3OC3OC(CN)CCC3N)C2O)O1	train
C=C1[C@@H](O)C[C@H]2C(C)(C)C[C@H](Cl)C[C@]2(C)[C@H]1C[C@H](O)[C@H]1CC(=O)NC1=O	train
NC(=O)c1ncn(C2OC(COP(=O)(O)O)C(O)C2O)c1N	train
CS[C@H]1O[C@H]([C@H](NC(=O)[C@H]2NC[C@@H]3C[C@H](CC(C)C)CCO[C@H]32)[C@H](C)Cl)[C@H](O)[C@H](O)[C@H]1O	train
O=c1[nH]c2cc([N+](=O)[O-])c3c(c2[nH]c1=O)C[C@@H](c1nnn[nH]1)C3	train
O=C1C(=Cc2cc(F)c(O)c(F)c2)N=C(C=NO)N1Cc1cccc2nc[nH]c12	train
Clc1cc2nc(C3CCNCC3)n(Cc3ccccc3Br)c2cc1Cl	train
COc1cc(-c2nc3cc4[nH]c(=O)[nH]c4cc3[nH]2)cc(OC)c1O	train
CC1=C\[C@@H](O)CC(=O)Cc2nc(co2)C(=O)n2cccc2C(=O)O[C@H](C(C)C)[C@H](C)/C=C/C(=O)NC\C=C\1	train
COc1ccc2[nH]c3c(C)c4ccncc4c(C)c3c2c1	train
COc1ccc2nc3cc(Cl)ccc3c(NCCCCNc3nc(N)nc(N)n3)c2c1	train
Nc1nc2c(ncn2[C@H]2CC[C@@H](CO)O2)c(=O)[nH]1	train
c1ccc2c(CN3CCN(Cc4c[nH]c5ccccc45)CC3)c[nH]c2c1	train
Nc1ncnc2c1ncn2C1OC(COP(=O)(O)OS(=O)(=O)O)C(OP(=O)(O)O)C1O	train
Cc1ccc2ccc(NC(=O)CCN)nc2n1	train
C=C[C@@]1(C)C[C@H](OC(=O)NC(=O)c2ccc(N)nn2)[C@]2(C)[C@H](C)CC[C@@]3(C[C@H](O)C(=O)[C@@H]32)[C@@H](C)[C@H]1O	train
NCCCOc1ccc(-c2cc3ccccc3s2)cc1CNCCC1CCNCC1	train
Cn1c(=O)[nH]c(=O)c2c1nc(N1CCNCC1)n2Cc1ccccc1	train
Cn1c(=O)[nH]c(=O)c2c1nc(N/N=C1\C(=O)NC3=C1C=C=C=C3)n2CC1=C=C=C(Cl)C=C1	train
COc1cc(-c2nc3ccc(-n4cnnn4)cc3[nH]2)ccc1OCCN1CCCC1	train
NC(=O)c1ncn(-c2ccncc2)c1N	train
CN=C(N)N	train
O=C(NCCCN1CCCCC1)c1c(O)c2c([nH]c1=O)CCCC2	train
NCCNc1ccc2cccnc2n1	train
CC(=O)[C@H]1O[C@@H](OC2=CCC(/C=C(\C)C(=O)N[C@@H]3[C@H](O)[C@@H](O)[C@H]4OCO[C@H]4[C@@H]3O)=CC2=O)[C@@H](O)[C@@H]1O	train
CCCCn1c(C2CCNCC2)nc2cc(Cl)c(Cl)cc21	train
CC(=O)[C@@H]1C(=O)C[C@H]2O[C@@H]3[C@H](C(C)=O)[C@@H](O)C[C@@H](O)[C@@H]3[C@@]2(C)C1=O	train
Nc1ncnc2c1ncn2C1OC(COP(=O)(O)O)C2OP(=O)(O)OC21	train
CCOC(=O)c1ccccc1NC(=O)N1CCCN(Cc2csc(C)n2)CC1	train
OC(CNCC1CCCO1)Cn1c2ccc(Br)cc2c2cc(Br)ccc21	train
CCOc1ccc(NCC(O)Cn2c3ccccc3c3cc(Br)ccc32)cc1	train
Cn1cc(C(=O)O)c(=O)c2cc(N)c(N3CCN(c4ccccn4)CC3)cc21	train
CCCC(=O)OC1C(C)OC(OC2C(C)OC(OC3C(CC=O)CC(C)C(O)C=CC=CCC(C)OC(=O)CC(O)C3OC)C(O)C2N(C)C)CC1(C)OC(=O)CC	train
O=C1C=CN(c2c(F)cc(N3C[C@H](CNc4ccon4)OC3=O)c(F)c2F)CC1	train
NC(N)=NCCCCNCc1cc(-c2cccs2)ccc1OCCN=C(N)N	train
N=C(N)c1cccc(NC(=O)c2cccc(C(=O)Nc3cccc(C(=N)N)c3)c2)c1	train
COc1cccc2c1Sc1ccccc1N2CCCN(C)C	train
CC(C)(C)CC(C)(C)NCC(=O)Nc1c2c(nc3ccccc13)CCC2	train
CC(=O)NC[C@H]1CN(c2ccc(-c3ccncc3)cc2)C(=O)O1	train
Cc1ccc(-c2nnc(-c3nc(NCc4cccc5c4OCO5)c4ccccc4n3)o2)cc1	train
CC(=O)NC[C@H]1CN(c2ccc(-c3ccc(CNC(=O)/C=C/c4c(C)[nH]c(=O)[nH]c4=O)cc3)c(F)c2)C(=O)N1	train
O=c1c2[nH]c3ccc(Br)cc3c2ncn1CCN1CCNCC1	train
COc1cc2c(O)ncnc2cc1OCCCN1CCCCC1	train
CN1CCN(CCc2ccc(-c3ccc(-c4ccc(CCN5CCN(C)CC5)cc4)o3)cc2)CC1	train
COCC(=O)OC1CCn2c1nc1c2C(=O)C(C)=C(NC(C)=O)C1=O	train
Cc1ncc(C[n+]2cccc(CCOP(=O)(O)OP(=O)(O)O)c2C)c(N)n1	train
NCCNc1c2c(c(NCCN)c3occc13)C(=O)c1ccccc1C2=O	train
CCc1nc2ccccc2cc1C(=O)O	train
COc1cc2c(O)ncnc2cc1OCC1CCN(C)CC1	train
Cc1n[nH]cc1P(=O)(O)OCC1OC(n2cnc3c(=O)[nH]c(N)nc32)C(O)C1O	train
N=C(N)SCc1nc2c(n1CCC1=C=C=C=C=C1)C=C=C=C2	train
CNc1ncc(CN2CCC[C@H](c3nc(-c4cccs4)cc(=O)[nH]3)C2)cn1	train
C#CCc1nc(Nc2cc(Nc3ccc4ccccc4n3)ccn2)cc(N2CCN(C)CC2)n1	train
C[n+]1c(/C=C/c2cc3ccccc3[nH]2)ccc2ccccc21	train
Cc1ccc(NCCCNC(=O)c2cn(CCN)nn2)nc1	train
CN(CC(=O)O)NC(=O)C[C@H](N)C[C@@H](O)CN	train
NC(=O)c1ncn(CCO)c1N	train
COc1ccccc1CNc1ncc(-c2cccc(Br)c2)n1C	train
COc1cc(C=C2N=C(C)N(c3ccc([N+](C)(C)C)cc3)C2=O)cc(OC)c1O	train
NC(N)=NCCCCNCc1cc(-c2cc3ccccc3o2)ccc1OCCN=C(N)N	train
Cn1c(=O)c2[nH]c(=O)[nH]c2n(C)c1=O	train
CN(c1ccc2c(c1)OCCO2)c1nc(NCCCO)c2ccccc2n1	train
CCOC(=O)[C@H](CCCN=C(N)N)NC(=O)c1ccccc1	train
O=C(NCCCN1CCCCC1)C1C(=O)NC2=C(CCCC2)C1O	train
C[Se+](CCC(N)C(=O)O)CC1OC(n2cnc3c(N)ncnc32)C(O)C1O	train
O=C1C2=C(Nc3cc([N+](=O)[O-])ccc3N2)OC1c1ccc(C2OC3=C(Nc4ccc([N+](=O)[O-])cc4N3)C2=O)cc1	train
NCc1c[nH]c2[nH]c(N)nc(=O)c12	train
CC(O)c1cccc(Nc2nc(N3CCCC3)c3ccccc3n2)c1	train
Nc1ncnc2c1ncn2C1OC(COP(=O)(O)OP(=O)(O)OP(=O)(O)O)C(O)C1O	train
CN1CCN(CCCNc2nc3cc([N+](=O)[O-])ccc3nc2NCc2ccc(NC(=O)CCCCC3SCC4NC(=O)NC43)cc2)CC1	train
CC(=N)NCCCCC(N)C(=O)O	train
Nc1nc(CN2CCCCCC2)nc(Nc2ccc(F)cc2)n1	train
COC(=O)c1cc2cc3cc4cc(CC(=O)O)c(C(=O)/C=C(\O)c5ccccc5O)c(OC)c4c(OC)c3c(O)c2c(=O)o1	train
c1ccc(-c2nnc(-c3nc(NCCc4cccs4)c4ccccc4n3)o2)cc1	train
Cc1ncc(C[n+]2csc(CCOP(=O)(O)OP(=O)([O-])O)c2C)c(N)n1	train
CC(=O)c1ccc(-c2ccc3oc(C(=O)c4cc(O)c(O)c(O)c4)cc3c2)cc1	train
c1cnc2nc(C3CCNCC3)[nH]c2c1	train
Nc1nc(N)c2[nH]cnc2n1	train
O=S(=O)(O)CCN1CCN(CCO)CC1	train
Fc1ccc2nncc(SCc3ccccc3)c2c1	train
Cc1cc(C)c(C2=C=C=C(c3c(C)cc(C)cc3C)N2[Ru](Cl)(Cl)(=Cc2ccccc2)[PH](C2CCCCC2)(C2CCCCC2)C2CCCCC2)c(C)c1	train
CC(=N)Nc1ccc2c(c1)C(=O)N(CCN1CCCC1)c1ccccc1O2	train
Fc1ccc(Oc2ncccc2CNC2CN3CCC2CC3)cc1F	train
CN1CCN(CCNc2nc(N)c(C(=O)NC(=N)N)nc2-c2ccccc2)CC1	train
C=CC1CN2CCC1CC2C(O)c1ccnc2ccccc12	train
CCC(=O)N1CCN(c2nc(N)c3cc(OC)c(OC)cc3n2)CC1	train
CCN(CC)CCOc1ccc(/C(=C(/Cl)c2ccccc2)c2ccccc2)cc1	train
CC(=O)C(=O)NC1C=C(C)C=CC(O)CC=C(C)C=CC(O)CC2OC(=O)C1(C)C(=O)C2C	train
CC(=O)Nc1ccc(Nc2nc(NCC3CCCO3)c3ccccc3n2)cc1	train
CN(CCO)c1ccc(C=C(C#N)c2nc3ccccc3o2)cc1	train
Cc1ccc(-c2nc(CN3CCCCC3)cc(CN3CCCCC3)c2O)cc1	train
CC1=C[C@H]2O[C@@H]3C[C@H]4OC(=O)/C=C\C=C\C(=O)OCC[C@@H](C)[C@H](O)C(=O)OC[C@@]2(CC1)[C@]4(C)[C@]31CO1	train
Cc1ccc(-c2nnc(-c3nc(N4CCCCC4)c4ccccc4n3)o2)cc1	train
Cc1c(Nc2nc(NCCCO)c3ccccc3n2)ccc2c1OCCO2	train
Nc1nc2c(ncn2C2OC3(COP(=O)(O)O)COC2C3O)c(=O)[nH]1	train
N=C(N)NC(=O)c1nc(-c2cnc(NCCCn3ccnc3)nc2)c(NCCC2=NCc3ccccc32)nc1N	train
Cc1ccc2nc(Nc3ccc4nc(N5CCOCC5)sc4c3)nc(NCCCO)c2c1	train
CN(CC[C@H](N)CC(=O)N[C@H]1C=C[C@H](n2ccc(N)nc2=O)O[C@@H]1C(=O)O)C(=N)N	train
Cn1c(=O)[nH]c2nc[nH]c2c1=O	train
CN1C(=O)C(=Cc2cc(F)c(O)c(F)c2)N=C1C=Cc1ccccc1	train
Cc1cc2nc3c(O)nc(O)nc3[n+](CCCCCCC(=O)O)c2cc1NC1CCCC1	train
NCc1cc(NC(=O)c2ccccn2)cc(-c2nc(C3CCOC3)no2)c1	train
COc1ccc(NCC(O)Cn2c3ccc(Br)cc3c3cc(Br)ccc32)c(OC)c1	train
Cc1cc(N(C)C)nc2ccccc12	train
N[C@@H]1[C@@H](O[C@@H]2O[C@H]3C(=O)c4cc5ccccc5cc4[C@@H]3[C@@]23C(=O)C=Cc2ccccc23)O[C@H](CO)[C@H](O)[C@H]1O	train
Nc1nc2c(c(=O)[nH]1)CCCN2	train
CC1C[C@@]2(C)C(NCCCNCCCCNCCCN)=Nc3ccccc3[C@@]2(C)N(C)c2ccccc21	train
CN1Cc2csc3c(C(=O)O)c(=O)c4cc(F)c(N5CC(O)C(N(C)C)C5)c1c4n23	train
CCOc1ccc(NCC(O)CN(c2ccc(Br)cc2)c2ccc(Br)cc2)cc1	train
Nc1nc2c(ncn2[C@H]2C[C@H](O)[C@@H](CO)O2)c(=O)[nH]1	train
CN1CC(=O)N=C1N	train
CNc1ccc2ccccc2n1	train
CC1=C\[C@@H](O)C[C@H](O)Cc2nc(co2)C(=O)N[C@H](C)C(=O)O[C@H](C(C)C)[C@H](C)/C=C/C(=O)NC/C=C\1	train
Cc1ccc2ccc(NC(=O)OCCCNCCCOC(=O)Nc3ccc4ccc(C)nc4n3)nc2n1	train
CN(C)c1ccc(-c2nc3c4cc(I)ccc4c4ccccc4c3[nH]2)cc1	train
COc1ccc(-c2cnc(NCc3cccc(OC)c3)n2C)cc1	train
C#CCCC1(CCNCc2c[nH]c3[nH]c(N)nc(=O)c23)N=N1	train
COC1=C(C)C(=O)c2c(c(COC(N)=O)c3n2C[C@H]2[C@@H]3N2C)C1=O	train
O=c1[nH]c(=O)c2nn[nH]c2[nH]1	train
N=C(N)c1ccc(-c2ccc(-c3ccc(-c4ccc(C(=N)N)cn4)[se]3)[se]2)nc1	train
NCCS(=O)(=O)C[C@H](N)C(=O)O	train
N=C(N)c1ccc(NC(=O)c2ccc(C(=O)Nc3ccc(C(=N)N)cc3)c(N)c2)cc1	train
COc1cc2c(c(OC)n1)[C@]1(O)[C@H](O)[C@H](C(=O)N(C)C)[C@@H](c3ccccc3)[C@]1(c1ccc(C#N)cc1)O2	train
CC(=O)Nc1nc(-c2cccc(NC(=O)[C@H]3C[C@H](OCOC(=O)C(N)CCCN=C(N)N)[C@@H](COCOC(=O)C(N)CCCN=C(N)N)O3)c2)cs1	train
CC(=O)NC[C@H]1CN(c2ccc(-c3ccc(-n4ccnn4)cc3)c(F)c2)C(=O)O1	train
CN1C(=Cc2cc[n+](C)c3ccccc23)Sc2ccccc21	train
CCOC(=O)c1c2c(n3ccccc13)C(=O)c1ccccc1C2=O	train
CN(C)CCCn1c(N)nc2ccc3c(c21)CC(CN(C)C)O3	train
CC(=Cc1ccc2c(c1)OCO2)[N+](=O)[O-]	train
CC(=O)N[C@@H](Cc1ccccc1)C(=O)O	train
CN(C)CCCNc1nc2cc([N+](=O)O)ccc2nc1NCCCc1ccc(NC(=O)CCCCC2SCC3NC(=O)NC32)cc1	train
CN[C@@H]1C[C@H]2O[C@@](C)([C@@H]1OC)n1c3ccccc3c3c4c(c5c6ccccc6n2c5c31)C(=O)NC4	train
CCOc1ccc(C(=O)Nc2cc(-c3nc4ccccc4[nH]3)ccc2Cl)cc1[N+](=O)[O-]	train
NC(Cc1c[nH]c2ccc(O)cc12)C(=O)O	train
CC1(C)CC(Cl)CN(CCCN2CC(Cl)CC(C)(C)C2)C1	train
Cc1ccc2nc(Nc3ccc4nc(NCC(C)C)sc4c3)nc(NCCCO)c2c1	train
CC(=O)c1cccc(NC2C(N)C(NC(=O)N(C)C)(C(C)O)C(C)(O)C2(O)COC(=O)c2c(C)cccc2O)c1	train
CN(CCO)c1cc2sc(C=C(C#N)c3ccc(C#N)cc3)cc2s1	train
Cc1cn2nc(-c3cc(=O)[n+]4cc(N5CCNC6(CC6)C5)ccc4[nH]3)cc(C)c2n1	train
CCN(CC)CC[n+]1ccc2c(C)c3[nH]c4ccc(O)cc4c3c(C)c2c1	train
CC1c2cccc(O)c2C(O)=C2C(=O)C3(O)C(O)=C(C(N)=O)C(=O)CC3C(O)C21	train
COc1ccc2c(c1)[nH]c1c(C)nccc12	train
CN(C)c1cc(NC(=O)Cc2ccc(O)cc2)c2ccccc2n1	train
NC(N)=Nc1ccc(OC(=O)c2ccc(N=C(N)N)cc2)cc1	train
Cn1cc(C(=O)N2CCC(c3ccc(CN4CC(O)C4)cc3)CC2)c2ccccc21	train
N[C@@H]1C[C@H](N)CN(c2nc(Nc3ccc(NC(=O)c4ccc(Cl)cc4)c(O)c3)nc(N3C[C@@H](N)C[C@H](N)C3)n2)C1	train
Cc1cc2nc3c(=O)[nH]c(=O)[nH]c3[n+](CCCc3ccccc3)c2cc1C	train
CN=C(N)Nc1ccc(NC(=O)Nc2ccc(NC(=O)Nc3ccc(NC(N)=NC)cc3)cc2)cc1	train
CC1=NC(=Cc2cc(F)c(O)c(F)c2)C(=O)N1C	train
C/C1=C2/[N-]C([C@H](CC(N)=O)[C@@]2(C)CCC(=O)NCC(C)O)[C@]2(C)N=C(/C(C)=C3\N=C(/C=C4\N=C1[C@@H](CCC(N)=O)C4(C)C)[C@@H](CCC(N)=O)[C@]3(C)CC(N)=O)[C@@H](CCC(N)=O)[C@]2(C)CC(N)=O	train
CN[C@@H]1[C@@H](O[C@@H]2c3cc4ccccc4cc3[C@H]3[C@H]2C=C[C@@]32C(=O)C=Cc3ccc(OC)cc32)O[C@@H](C)[C@@H](O)[C@H]1O	train
FC(F)(F)c1ccc(Cn2c(C3CCNCC3)nc3cc(Cl)c(Cl)cc32)cc1	train
O=c1nc[nH]c2nc[nH]c12	train
CC(C)C[C@H](N)C(=O)N[C@@H](CCCN=C(N)N)C(=O)O	train
Cc1ccc2nc(NCCCN3CCOCC3)c3nncn3c2c1	train
CN1C(=O)C(=Cc2cc(F)c(O)c(F)c2)N=C1C=Cc1ccc(C#N)cc1	train
CCn1nc(CNC(=O)CN(C)C2CCNCC2)c2ccccc21	train
Nc1ncnc2c1ncn2C1OC(CSCCC(N)C(=O)O)C(O)C1O	train
COc1ccc2[nH]c3c(=O)n(CCCN(C)C4CCCCC4)cnc3c2c1	train
CC(=O)c1c(C)c2cnc(Nc3ccc(N4CCNCC4)cn3)nc2n(C2CCCC2)c1=O	train
O=[N+]([O-])c1ccc2nc(C3CCNCC3)[nH]c2c1	train
Nc1nc2c(ncn2C2OC(COP(=O)(O)OP(=O)(O)OCC3OC(n4cnc5c(=O)[nH]c(N)nc54)C(O)C3O)C(O)C2O)c(=O)[nH]1	train
NC(N)=NCCCC(=O)O	train
COC(=O)C1C(O)CCC2CN3CCc4c([nH]c5ccccc45)C3CC21	train
N=C(NCCN1CCCC1)c1cccc(-c2ccc(-c3cccc(C(=N)NN4CCOCC4)c3)s2)c1	train
Cc1nc(Nc2cc(Nc3ccc4ccccc4n3)ccn2)cc(N2CCN(C)CC2)n1	train
NC(N)=NCCC(=O)O	train
Cc1ccccc1OCCNc1cc(N2CCNCC2)ccc1[N+](=O)[O-]	train
Nc1ccc2nc(C3CCNCC3)[nH]c2c1	train
NC(N)=NC(CC(=O)O)C(=O)O	train
Cc1ccccc1NCC(O)Cn1c2ccc(Br)cc2c2cc(Br)ccc21	train
CN[C@H]1C[C@@H](N)[C@H](O)[C@@H](O[C@@H]2O[C@H](CO)C(O)[C@@H]3O[C@@]4(O[C@@H]([C@@H](N)CO)[C@H](O)[C@@H](O)[C@H]4O)O[C@@H]23)[C@@H]1O	train
O=C(NCCN1CCCCC1)c1c(O)c2c([nH]c1=O)C=C=C=C2	train
Nc1nc(N)c2nc[nH]c2n1	train
CCC1OC(=O)C(C)C(=O)C(C)C(OC2OC(C)CC(N(C)C)C2O)C(C)(OC)CC(C)C(=O)C(C)C2N(CCCCn3cnc(-c4cccnc4)c3)C(=O)OC12C	train
N=C(N)c1ccc(NCCNc2ccc(C(=N)N)cc2)cc1	train
COc1ccc2nc3c(C(=O)NCCN(C)C)cccc3c(NCCCCc3c(N)nc(N)nc3N)c2c1	train
CN(C)CCCN=C(N)c1ccc(C(N)=NCCCN(C)C)cc1	train
CNC(=O)c1cc2ccc(-c3ccc(OCCCN)c(CNCCC4CCNCC4)c3)cc2o1	train
Cn1c(=O)[nH]c(=O)c2c1ncn2CCN1CCCCC1	train
NC1=C=Cc2nc(N)nc(N)c2[C@@H]1N	train
CN1C=CC(=CC=Cc2oc3ccccc3[n+]2C)c2ccccc21	train
CN(C)CCNCc1ccc2nccnc2c1	train
Nc1nc2c(ncn2C2OC(COP(=O)(O)n3cc[n+](P(=O)(O)OCC4OC(n5cnc6c(=O)[nH]c(N)nc65)C(O)C4O)c3N)C(O)C2O)c(=O)[nH]1	train
CC(C)c1oc(=O)cc2c1[C@@H](O)[C@H]1OC(=O)[C@@]3(C)[C@@H](O)[C@H]4O[C@H]4[C@@]2(C)[C@@H]13	train
Nc1nc(NO)c2[nH]cnc2n1	train
NC[C@H](CO[C@@H]1O[C@@H](CN)[C@@H](O)[C@H](O)[C@H]1N)OCc1ccc2ccccc2c1	train
CN(C)c1ccc2nc3ccc(=[N+](C)C)cc-3sc2c1	train
N[C@@H]1C[C@H](N)[C@@H](O)[C@H](O)[C@H]1OCn1cncn1	train
O=c1[nH]c(=O)c2[nH]cnc2[nH]1	train
CCNc1nc(Nc2ccc(NC(C)=O)cc2)nc2ccccc12	train
COC1C(C)OC(OC(C)C(O)C=CC=CC=CC(=O)C(C)C(O)C(C)C2CC=CC=CC=CC(O)C(=O)C(C)=CC=CC(C)=CC(O)C(C)=CCC(=O)O2)C(OC)C1O	train
NCCNc1c2c(c(NCCN)c3sccc13)C(=O)c1ccccc1C2=O	train
Cn1c(=O)[nH]c(=O)c2[nH]cnc21	train
Nc1ncnc2c1ncn2[C@H]1C[C@H](O)[C@@H](CO)O1	train
NCCCOc1ccc(-c2ccc3cc[nH]c3c2)cc1CNCCC1CCNCC1	train
NCCOC[C@H](N)C(=O)[O-]	train
CN(C)[C@@H]1C(=O)C(C(N)=O)C(=O)[C@H]2C(O)C3C(O)c4c(O)ccc(Cl)c4[C@@H](O)[C@H]3C[C@@H]12	train
Nc1ncc2[nH]cnc2n1	train
Cc1nc2c(=O)[nH]c(N)nc2[nH]1	train
N=C(N)NCCCCN	train
CC1=C[C@H]2O[C@@H]3[C@H](O)C[C@](C)([C@@]2(CO)[C@H](O)C1=O)[C@]31CO1	train
c1ccc(COc2cccc(-c3ccc4[nH]nc(-c5nc6ccccc6[nH]5)c4c3)c2)cc1	train
C=CCc1cccc(-c2n(C)c3ccccc3[n+]2C)c1O	train
CNC(=O)C[n+]1c(C=C2C=CN(C)c3ccccc32)sc2ccccc21	train
COc1cccc(C=C2SC(=S)C(N)C2=O)c1OC	train
Cc1c2cnccc2c(C)c2c1c1ccccc1n2CCNCc1ccccc1	train
CCN(CC)CCNC(=O)c1cc2cc(NC(=O)c3cc4cc(N)ccc4[nH]3)ccc2[nH]1	train
c1ccc(Cc2ccccc2-c2ccc(-c3ccccc3Cc3ccccc3)o2)cc1	train
Cc1cc2nc3c(=O)[nH]c(=O)nc-3n(CCN(CCCC(=O)O)Cc3ccccc3)c2cc1C	train
N=C(N)NCCC[C@H](N)C(=O)Nc1ccc2c(c1)C1c3cc(NC(=O)[C@@H](N)CCCNC(=N)N)ccc3C2c2ccc(NC(=O)[C@@H](N)CCCNC(=N)N)cc21	train
Cc1ccc2nc(Nc3ccc4nc(N(CCO)CCO)sc4c3)nc(NCCCO)c2c1	train
Nc1nc(=O)n(C2OC(COP(=O)(O)O)C(O)C2O)cc1Br	train
Nc1nc2c(c(=O)[nH]1)NC(CNc1ccc(C(=O)NC(CCC(=O)O)C(=O)O)cc1)CN2	train
CN(C)c1ccc2cc3ccc(N(C)C)cc3nc2c1	train
CCN1CCN(c2cc(C)c3nc(-c4cc5c(C)nc(C)cn5n4)cc(=O)n3c2)CC1	train
Nc1nc2c(ncn2C2OC(COP(=O)(O)n3ccnc3N)C(O)C2O)c(=O)[nH]1	train
CNC1C(O)C(OC2C(N)CC(N)C(OC3OC(C(C)CCNC(=O)c4ccc(-c5c6ccc(=[N+](C)C)cc-6oc6cc(N(C)C)ccc56)c(C(=O)O)c4)CCC3N)C2O)OCC1(C)O	train
COc1cc2nc(N3CCNCC3)nc(N)c2cc1OC	train
c1cc(C2=NCCN2)ccc1Oc1ccc(-c2nc3ccc(C4=NCCN4)cc3[nH]2)cc1	train
CNC(=O)c1cc2c(=O)n3cccc(C)c3nc2n(CCCO)c1=N	train
Fc1ccc(-c2nnc(-c3nc(NCCc4ccco4)c4ccccc4n3)o2)cc1	train
CN1C(=O)C(=Cc2cc(F)c(O)c(F)c2)N=C1C=NO	train
C[N+]1(C)CCc2cc(O)c(O)cc2C1Cc1ccc(O)c(O)c1	train
CN1C=CC(=Cc2sc3ccccc3[n+]2CC(=O)NCc2c(F)cccc2-n2cccn2)c2ccccc21	train
NC(N)=NCCC[C@@H](O)C(=O)O	train
C[n+]1cc2c3c(ccc2c2ccc4cc5c(cc4c21)OCO5)OCO3	train
CN(CCO)c1ccc(C=C(C#N)c2ccc(C#N)cc2)cn1	train
NC(=O)c1ncn(C2CCNCC2)c1N	train
O=C(CNC(=O)Nc1ccc(C2=NCCN2)cc1)Nc1ccc(C2=NCCN2)cc1	train
CN(C)CCCN=C(N)c1ccc(-c2ccc(-c3ccc(C(N)=NCCCN(C)C)cc3)s2)cc1	train
Nc1nc2[nH]cnc2c(=S)[nH]1	train
Cn1cnc2[nH]c(=O)[nH]c(=O)c21	train
CCc1cc(N2CCC(NCCn3ccnc3)CC2)nc(N2CCCC2)n1	train
Cc1cc2nc3c(=O)[nH]c(=O)nc-3n(CC(O)C(O)C(O)COP(=O)(O)O)c2cc1C	train
Nc1nc(OCC2CCCCC2)c2nc[nH]c2n1	train
CN(C)c1nc(N)c(C(=O)NC(=N)N)nc1-c1ccc(-c2ccccc2)cc1	train
CCN=C(N)N	train
CC=CC=CC1OC(O)(C(CC)C(=O)NCC=CC=C(C)C(OC)C(C)C2OC(C=CC=CC=C(C)C(=O)c3c(O)cc[nH]c3=O)C(O)C2O)C(O)C(O)C1(C)C	train
CC1=C\[C@@H](O)C[C@@H](F)Cc2nc(co2)C(=O)N2CCC[C@@H]2C(=O)O[C@H](C(C)C)[C@H](C)/C=C/C(=O)NC\C=C\1	train
Cc1ccc2c(c1)N(C)C=CC2=Cc1sc2ccccc2[n+]1CC(=O)NCCOCCOCCOCCNC(=O)CCCCC1SCC2NC(=O)NC21	train
CN(CC(=O)O)NC(=O)C[C@H](N)C[C@@H](O)CNCCCN	train
CC1Cc2c(N)nc(NCc3ccc(CNc4nc(N)c5c(n4)NC(=O)C(C)C5)cc3)nc2NC1=O	train
O=C(Nc1ccccn1)c1cccc(OCc2cscn2)c1	train
N=C(N)NC(=O)c1nc(-c2cnc(NCCc3c[nH]c4ccccc34)nc2)c(NCCC2=NCc3ccccc32)nc1N	train
O=c1nc2[nH][nH]cc-2c(=O)[nH]1	train
Cn1c(=O)c2c(ncn2C)n(C)c1=O	train
COc1cccc(Nc2cc(C)nc3ccc(C(=N)N)cc23)c1	train
N=C(N)NCc1ccc(CCNCc2cc(-c3cc4ccccc4s3)ccc2OCCCN)cc1	train
Cc1cn2cc(-c3cc4ccc(N5CCN(CCNC(=O)OC(C)(C)C)[C@@H](C)C5)cc4oc3=O)nc2c(C)n1	train
N=C(N)NCCCC(N)C(=O)O	train
Nc1nc(N)c2cncnc2n1	train
COc1ccc(CN2CCC(N3CCN(CCO)CC3)CC2)cc1OCc1ccccc1	train
Clc1ccc(Cc2ccc(-c3ccc(-c4ccc(Cc5ccc(Cl)cc5)cc4)o3)cc2)cc1	train
c1ccc(CCc2ccccc2-c2ccc(-c3ccccc3CCc3ccccc3)o2)cc1	train
N[C@@H](Cc1c[nH]cn1)C(=O)N[C@H](CO)[C@H](O)c1ccc([N+](=O)[O-])cc1	train
Nc1nc2c(c(=O)[nH]1)CC=N2	train
Cc1ccc2nc(Nc3ccc4nc(-c5ccccc5C)sc4c3)nc(NCCCO)c2c1	train
OC(CNc1ccc(N2CCOCC2)cc1)CN(c1ccc(Br)cc1)c1ccc(Br)cc1	train
CC1(C)CC(Oc2ccc(-c3ccc(-n4cccn4)cc3O)nn2)CC(C)(C)N1CC(F)(F)F	train
Cc1cccnc1N(C(=O)c1ccc(-c2cnn3cccnc23)cc1)C1CCCNC1	train
CN1CCN(CCc2cccc(-c3ccc(-c4cccc(CCN5CCN(C)CC5)c4)o3)c2)CC1	train
Nc1ncnc(N)n1	train
CC(=O)Nc1nc(-c2cccc(NC(=O)Cc3cn(COC4C(N)CC(N)C(O)C4O)nn3)c2)cs1	train
NCCC(O)C(=O)NC1CC(N)C(OC2OC(CO)C(O)C(O)C2N)C(OC2OC(CO)C(OC3OC(CN)C(O)C(O)C3N)C2OCCNCCc2ccccc2)C1O	train
Cc1nc(Cc2cc(F)c(O)c(F)c2)c(O)n1C	train
CNC1C(O)C(OC2C(N)CC(N)C(OC3OC(CN)CCC3N)C2O)OCC1(C)O	train
Clc1ccccc1Cc1ccc(-c2ccc(-c3ccc(Cc4ccccc4Cl)cc3)o2)cc1	train
c1ccc2c(N3CCCC3)nc(Nc3ccc4c(c3)OCO4)nc2c1	train
CN1CCN(c2nc(Nc3ccc(O)cc3)nc3ccccc23)CC1	train
CC(C)=CCN1CCN(c2cc(C)nc3ccccc23)CC1CCO	train
NCc1ccc(-c2csnn2)cc1	train
Cc1c2ccncc2c(C)c2c1[nH]c1ccccc12	train
Nc1nc(=O)c2ncn(C3OC(CO)C(O)C3O)c2[nH]1	train
Cc1ccc2occ(CN3CCCN(C)CC3)c(=O)c2c1	train
CNc1ncnc2[nH]cnc12	train
CC(=O)Nc1ccc(Nc2nc(N3C[C@H](N)C[C@@H](N)C3)nc(N3C[C@H](N)C[C@H](N)C3)n2)cc1	train
Clc1cc2nc(C3CCNCC3)[nH]c2cc1Cl	train
CN(C)C1C(=O)C(C(N)=O)=C(O)C2(O)C(=O)C3=C(O)c4c(O)cccc4C(C)(O)C3CC12	train
Nc1nc2c(c(=O)[nH]1)N(C=O)C(CNc1ccc(C(=O)NC(CCC(=O)O)C(=O)O)cc1)CN2	train
Cc1cccc2c(NCCCO)nc(Nc3ccc4c(c3)OCCO4)nc12	train
CC=C(NC(=O)c1csc(-c2csc(-c3ccc4c(n3)-c3csc(n3)C(C(C)O)NC(=O)c3csc(n3)C(C(C)C)NC(=O)c3csc(n3)C(=CC)NC(=O)C(C(C)O)NC(=O)c3csc-4n3)n2)n1)C(=O)NCC(C)O	train
Cc1ccc2c(C)cc(N)nc2c1	train
CON(C)Cc1ccc(O)c2c1C[C@H]1C[C@H]3[C@H](N(C)C)C(O)=C(C(N)=O)C(=O)[C@@]3(O)C(O)=C1C2=O	train
c1cc2nc(C3CCNCC3)[nH]c2cn1	train
CN(C)c1ccc2cc3ccc(=[N+](C)C)cc-3oc2c1	train
C/C(=C\[C@H](C)C(=O)C[C@H](O)CC1CC(=O)NC(=O)C1)[C@@H]1OC(=O)/C=C/CC/C=C\C=C\[C@@H]1C	train
CN1C(=O)N[C@H]2[C@@H]3NC(=O)c4ccc(Br)n4[C@@H]3C[C@]21O	train
OCC1=C=C=C(c2nc(C3=C=NC4=C(C=C=C=C4)C3)c(C3=C=C=C=C=C3)[nH]2)C=C1O	train
C=C(NC(=O)c1csc(-c2nc3c(cc2O)-c2nc(cs2)C(=O)NC(C(C)O)C(=O)NC(=CC)c2nc(cs2)C(=O)NC2CC(O)C(=O)OCc4cccc5[nH]c(c(C)c45)C(=O)SCC(NC(=O)c4csc2n4)c2nc-3cs2)n1)C(N)=O	train
CN(c1ccc(-c2cc3ccccc3s2)nn1)C1CC(C)(C)NC(C)(C)C1	train
O=c1c2ccccc2[nH]c2cc3c(=O)c4ccccc4[nH]c3cc12	train
CN(C)C1C(=O)C(C(N)=O)=C(O)C2(O)C(=O)C3=C(O)c4c(O)cccc4CC3CC12	train
CN(C)CCCN=C(N)c1ccc(-c2ccnc(-c3ccc(C(N)=NCCCN(C)C)cc3)n2)cc1	train
O=[N+]([O-])c1cc(C(F)(F)F)ccc1Cn1c(C2CCNCC2)nc2cc(Cl)c(Cl)cc21	train
C=Cc1c(C)c2cc3[nH]c(cc4nc(cc5nc(cc1[nH]2)C(C)=C5CCC(=O)O)C(CCC(=O)O)=C4C)c(C)c3C=C	train
C[C@H]1C[C@@](C)(NC(=O)c2ccccc2)C[C@@H]([C@H](O)CC2CC(=O)NC(=O)C2)C1=O	train
CN=C(N)c1ccc(N=C(N)c2cccc(C(N)=Nc3ccc(C(N)=NC)cc3)c2)cc1	train
CC(=N)c1ccc(OCCCCCOc2ccc(C(=N)N)cc2)cc1	train
N=C(N)c1ccc(-c2ccc(-c3ccc(C(=N)N)cc3)o2)cc1	train
C(=NNC1=NCCN1)c1c2ccccc2c(C=NNC2=NCCN2)c2ccccc12	train
Nc1nc(=O)c2c(CCc3ccc(C(=O)NC(CCC(=O)O)C(=O)O)cc3)c[nH]c2[nH]1	train
Oc1cc(-n2cccn2)ccc1-c1ccc(OC2CCNCC2(F)F)nn1	train
CC(=O)Nc1cc(C(=O)Nc2cn(C)c(C(=O)NCCCC(=O)Nc3ccn(C)c3)n2)n(C)c1	train
O=c1[nH]c(O)nc2c1ncn2C1OC(COP(=O)(O)O)C(O)C1O	train
COC(=O)[C@@]12OC[C@]34[C@H]([C@@H](O)[C@@H]1O)[C@@]1(C)CC(=O)C(O)=C(C)[C@@H]1C[C@H]3OC(=O)[C@H](OC(=O)/C=C(\C)C(C)C)[C@@H]24	train
C[C@@H](O)[C@H](NC(=O)O)C(=O)O	train
CCn1c2ccccc2c2cc(C=Cc3cc(N4CCN(C)CC4)c4ccccc4[n+]3C)ccc21	train
CCCCCc1cc(/C=C2\N=CC(c3ccc[nH]3)=C2OC)[nH]c1C	train
C[C@H]1C(=O)N(C)C(=O)c2c1ncn2C[C@H](O)N(C)C	train
C=CC1(C)CC(OC(=O)CSCCN(CC)CC)C2(C)C(C)CCC3(CCC(=O)C32)C(C)C1O	train
O=C(CCCC[PH](c1ccccc1)(c1ccccc1)c1ccccc1)N[C@H](CO)[C@H](O)c1ccc([N+](=O)[O-])cc1	train
Cc1ccc2c(N)c(C(=O)Nc3cccc(C(F)(F)F)c3)sc2n1	train
CNC1C(OC2C(OC3C(O)C(O)C(N=C(N)N)C(O)C3N=C(N)N)OC(C)C2(O)C=O)OC(CO)C(O)C1O	train
O=c1[nH]c(NC2CCCCC2)nc2[nH]cnc12	train
CSCC[C@H](O)NCCCN1c2ccccc2Sc2ccc(C(C)=O)cc21	train
COc1ccc2nc(C3CCNCC3)[nH]c2c1	train
N=C(N)c1ccc(-c2ccc(-c3ccc(-c4ccc(C(=N)N)cn4)s3)s2)nc1	train
Cc1cc2nc3c(=O)[nH]c(=O)nc-3n(CC(O)C(O)C(O)CO)c2cc1C	train
c1cc(N2CCNCC2)c(CNCc2ccc3nccnc3c2)cn1	train
Cn1c(=O)n(CCC(=O)O)c(=O)c2[nH]cnc21	train
CN(C)c1ccc2ccccc2n1	train
Cc1ccc2nc(Nc3ccc4nc(-c5ccc6[nH]ccc6c5)sc4c3)nc(NCCCO)c2c1	train
CN(C)CCCN=C(N)c1ccc(-c2ccc(-c3nc4ccc(C(N)=NCCCN(C)C)cc4[nH]3)o2)cc1	train
Cc1ccc(NCCN)nc1	train
Clc1ccccc1Cc1cccc(-c2ccc(-c3cccc(Cc4ccccc4Cl)c3)o2)c1	train
Nc1nc2c(ncn2C2OC3COP(=O)(O)OC4C(COP(=O)(O)OC3C2O)OC(n2cnc3c(=O)[nH]c(N)nc32)C4O)c(=O)[nH]1	train
S=C1N(CN2CCCCC2)CCN1CN1CCCCC1	train
Cc1nc2nc(N)ccc2c(C)c1C	train
c1ccc(-c2ccc(-c3ccccc3CCN3CCNCC3)o2)c(CCN2CCNCC2)c1	train
CN1CCN(CCCN2c3ccccc3Sc3ccc(Cl)cc32)CC1	train
CCC1CC1(N)C(=O)O	train
O=C1NC(=S)NC(=O)C1=Cc1cn(-c2ccccc2)nc1-c1cc2c(ccc3ccccc32)oc1=O	train
O=C(Cc1ccccc1)OC[C@H]1OC(=O)N[C@@H]1CN1CCN(c2ccccc2)CC1	train
Clc1ccc2nc(C3CCNCC3)[nH]c2c1	train
N[C@@H]1C[C@H](N)[C@@H](O)[C@H](O)[C@H]1OCn1cnc2c(=O)[nH]cnc21	train
CN1C(=O)C(=Cc2ccc(N(C)CCO)cc2)N=C1C=Cc1ccccc1	train
CCCCCN1C(=O)C2C3c4ccccc4C(CO)(c4ccccc43)C2C1=O	train
COc1ccc2c(c1)SC1=Nc3sc4cc(OC)ccc4[n+]3CN12	train
Cc1ncc(C[n+]2cccc(CCO)c2C)c(N)n1	train
CS(=O)(=O)c1ccc(C(O)C(CF)NC(=O)C(Cl)Cl)cc1	train
NCCNc1ccc([N+](=O)[O-])cn1	train
NC(=O)c1ncn(-c2ccccn2)c1N	train
Cc1nc2ccc(Nc3nc(NCCCO)c4ccccc4n3)cc2s1	train
Cc1ccc(-c2onc(C)c2C)cc1S(=O)(=O)N1CCc2ccccc21	train
Cc1cn2cc(-c3cc4ccc(N5CCN[C@@H](C)C5)cc4oc3=O)nc2c(C)n1	train
NC(=O)c1ccc[n+](C2OC(COP(=O)([O-])OP(=O)(O)OCC3OC(n4cnc5c(N)ncnc54)C(O)C3O)C(O)C2O)c1	train
Cc1ccc(-c2nnc(-c3nc(NCCN4CCCC4)c4ccccc4n3)o2)cc1	train
Nc1ncnc2c1ncn2C1OC(COP(=O)(O)n2ccnc2N)C(O)C1O	train
CCn1c2ccccc2c2cc(N3CCNCC3)ccc21	train
CN(C)CCNc1cc(-c2ccc(N3CCN(C)CC3)c(N3CCN(C)CC3)c2N2CCN(C)CC2)nc2ccccc12	train
Nc1nc2c(ncn2C2OCC(O[PH](=O)(=O)O)C2O)c(=O)[nH]1	train
Cc1ccc(-c2nnc(-c3nc(NCCc4ccc(S(N)(=O)=O)cc4)c4ccccc4n3)o2)cc1	train
CCSc1ccc2c(c1)N(CCCN1CCN(C)CC1)c1ccccc1S2	train
CN(c1ccccc1)C1c2ccccc2NC(=NCCCNCCCCNCCCN)C1(C)C	train
CCC1OC(=O)C(C)C(=O)C(C)C(OC2OC(C)CC(N(C)C)C2O)C(C)(OCC=Cc2cnc3ccccc3c2)CC(C)C(=O)C(C)C2NC(=O)OC12C	train
CC(CCc1ccco1)NC1CCC2(CCNCC2)CC1	train
COc1ccc(NS(=O)(=O)c2ccc(NC(=O)Nc3cccc4ccccc34)cc2)cc1	train
Nc1nc2ncncc2c(=O)[nH]1	train
CN(c1ccc(-c2ccc(-c3cn[nH]c3)cc2O)nn1)C1CC(C)(C)NC(C)(C)C1	train
N=C(NCCCCc1c(N)nc(N)nc1N)c1ccc(C(=N)NCCCCc2c(N)nc(N)nc2N)cc1	train
CCc1nc2ccccc2cc1C(=O)N[C@@H](CSSC[C@@H](NC(=O)c1cc2ccccc2nc1CC)C(=O)N1CCC[C@H]1C(=O)N[C@@H](Cc1ccccc1)C(=O)NCCCN)C(=O)N1CCC[C@H]1C(=O)N[C@@H](Cc1ccccc1)C(=O)NCCCN	train
NCCCOc1ccc(-c2ccc3ccccc3c2)cc1CNCCCCN=C(N)N	train
COc1ccc(OCCCN)c(CN2CCN(C(=N)N)CC2)c1	train
CCn1c2ccccc2c2cc(/C=C/c3ccc4ccccc4[n+]3C)ccc21	train
Cc1ccc2nc(Nc3ccc4nc(-c5ccc(F)cc5)sc4c3)nc(NCCCO)c2c1	train
Cc1ccc2nc(C3=C(N)N(C4CCCC4)CC3=O)[nH]c2c1	train
Nc1c(S(=O)(=O)O)cc(Nc2ccc(Nc3nc(Cl)nc(Nc4ccccc4S(=O)(=O)O)n3)c(S(=O)(=O)O)c2)c2c1C(=O)c1ccccc1C2=O	train
Nc1ncnc(=O)[nH]1	train
O=c1[nH]cnc2nc[nH]c12	train
COc1ccc2c3c(c4cc(OC)c(OC)cc4c2c1)C[C@H]1CCCCN1C3	train
C[C@@H]1C[C@@H]([C@H](O)CC2CC(=O)NC(=O)C2)C(=O)[C@@H](C)C1	train
NC1=NC2(N)N=CN=C2C=N1	train
CC(O)C(O)C1CNc2nc(N)[nH]c(=O)c2N1	train
N=C(N)NC(=O)c1nc(-c2ccccc2)c(NCCC2=NCc3ccccc32)nc1N	train
COc1cc(C=C2N=C(C=NO)N(c3ccc([N+](C)(C)C)cc3)C2=O)cc(OC)c1O	train
Nc1ncnc2c1ncn2C1OC(CO)C(O)C1O	train
c1cc(C2=NCCN2)ccc1Nc1ccc(-c2nc3ccc(C4=NCCN4)cc3[nH]2)cc1	train
N=C(N)NC(=O)c1nc(-c2ccccc2)c(NCCCn2ccnc2)nc1N	train
CSCC1OC(n2cnc3c(N)ncnc32)C(O)C1O	train
CCNC1CC(N)C(OC2OC(CN)=CCC2N)C(O)C1OC1OCC(C)(O)C(NC)C1O	train
COc1ccc(-c2onc(C)c2C)cc1S(=O)(=O)N1CCc2ccccc2C1	train
CN1CCN(c2ccc(-c3ccc4nc(-c5ccc(OCCCC(=O)N6CCN(c7nncc8sccc78)CC6)cc5)[nH]c4c3)cc2)CC1	train
Cn1cc(NC(=O)c2cc(NC(=O)c3cc(NC(=O)c4cc(NC(=O)c5cc(NC=O)cn5C)cn4C)cn3C)cn2C)cc1C(=O)NCCC(=N)N	train
c1cc(CCc2ccc(-c3ccc(-c4ccc(CCc5ccsc5)cc4)o3)cc2)cs1	train
CC(=O)c1ccc2c(c1)N(CCCNCN(CO)CO)c1ccccc1S2	train
COc1ccc(C(=O)c2nc3c(c(-c4ccccc4)c2N)c(=O)oc2ccccc23)cc1	train
C[n+]1ccc(CC2Sc3ccccc3N2CC(=O)NCCOCCOCCOCCNC(=O)CCCCC2SCC3NC(=O)NC32)c2ccccc21	train
COc1ccc(OCCN=C(N)N)c(CNCCCCN=C(N)N)c1	train
Oc1cc(-c2cccs2)nc(C2CCCN(Cc3cn(-c4ncccn4)cn3)C2)n1	train
N=C(N)CCCOC1=C=C=C=C=C1C1=C=C=C=C=C1	test
CC(=O)NC[C@H]1CN(c2ccc(-c3ccc(-n4ncnn4)cc3)c(F)c2)C(=O)O1	test
Cn1c(=O)c2[nH]cnc2n(C)c1=O	test
Cc1cn(C2OC3(COP(=O)(O)O)COC2C3O)c(=O)nc1N	test
COC1=C=CC(c2nc3c([nH]2)=C=C=C(c2nc4c([nH]2)=CC(N2CCN(C)CC2)=C=C=4)C=3)=C=C1OC	test
Nc1nc(=O)c2c([nH]1)N=CC(CNc1ccc(C(=O)NC(CCC(=O)O)C(=O)O)cc1)N2CO	test
Cc1ccc2c(c1)sc(-c1ccc(N(C)C)cc1)[n+]2C	test
CNC1C(OC2C(OC(=O)c3c(O)ccc4c(C)cc(OC)cc34)C=C3C#CC4(C5COC(=O)O5)OC4C#CCC32)OC(C)C(O)C1O	test
Nc1nonc1-n1nnc(CN2CCCCCC2)c1CN1CCCCCC1	test
CC(C)(C)C(Cn1ccnc1)NC(=O)Nc1ccc2[nH]ncc2c1	test
O=[N+]([O-])c1ccc(Cn2c(C3CCNCC3)nc3cc(Cl)c(Cl)cc32)cc1	test
N=C(N)c1ccc(N=NNc2ccc(C(=N)N)cc2)cc1	test
CC(=O)Nc1nc(-c2cccc(NC(=O)C(CNC(=O)[C@@H](N)CCCCN)NC(=O)[C@@H](N)CCCCN)c2)cs1	test
Clc1cc2nc(C3CCNCC3)n(Cc3ncccn3)c2cc1Cl	test
Cc1ccc2nc(Nc3ccc4nc(-c5cc[nH]n5)sc4c3)nc(NCCCO)c2c1	test
c1cc(-c2ccc(-c3ccc(C4=NCCN4)cc3)o2)ccc1C1=NCCN1	test
CN1N=C(N)c2cn(C3OC(CO)C(O)C3O)c3ncnc1c23	test
N=C(N)NCCCCNCc1cc(-c2cc3ccccc3o2)ccc1OCCCN	test
CCN(CC)CCOc1ccc(Nc2nc(-c3ccccc3NC(=O)CCN3CCN(C)CC3)nc3ccccc23)cc1	test
O=C(O)c1cc(O)c(O)c(O)c1	test
CO[C@@H]1[C@H](O)[C@@H](COP(=O)(O)O)O[C@H]1n1cnc2c(=O)[nH]c(N)nc21	test
N#Cc1c(N2CCCC2)nc(N)c2c(N)nc(N3CCCC3)cc12	test
COC1=C(c2cc3ccccc3[nH]2)C=N/C1=C\c1[nH]c(C)cc1C	test
COC(=O)C(CCCNC(=N)N)NC(=O)CCNC(=O)CCCCCNC(=O)c1cccc(-c2c3cc(N)ccc3c3ccc(N)cc3[n+]2C)c1	test
COc1cccc2c1C(=O)c1c(O)c3c(c(O)c1C2=O)C[C@@](O)(C(=O)CO)C[C@@H]3O[C@H]1C[C@H](N)[C@H](O)[C@H](C)O1	test
CC(=O)Nc1nc(-c2cccc(NC(=O)[C@H]3C[C@H](O)[C@@H](COCOC(=O)C(N)CCCCN)O3)c2)cs1	test
NC(N)=N/N=C/c1ccc(-c2cc3ccc(/C=N/N=C(N)N)cc3s2)cc1	test
CC(=O)C1=CCC2C3CCC4=CC(=O)C=CC4(C)C3=CCC12C	test
C[C@H]1CCCN1CCN1c2ccccc2Sc2ccc(Cl)cc21	test
CN(C)CCN(C)c1cnc(C=C(C#N)c2ccc(C#N)cc2)cn1	test
CN1CCC[C@@H]1CCNC(=N)c1cccc(-c2ccc(-c3cccc(C(=N)NCC[C@@H]4CCCN4C)c3)s2)c1	test
COc1cc2cc3c4cc(OC)c(OC)cc4cc[n+]3c(C)c2cc1OC	test
CN(C)CCCN=C(N)c1ccc(-c2ccc(-c3ccc(C(N)=NCCCN(C)C)cc3)[nH]2)cc1	test
c1cc(CN2CCC(C3=NCCN3)CC2)ccc1CN1CCC(C2=NCCN2)CC1	test
CC1(C)CC(Nc2ccc(-c3ccc4ccccc4c3)nn2)CC(C)(C)N1	test
NC(N)=NCCCCNCc1cc(-c2cc3ccccc3s2)ccc1OCCN=C(N)N	test
C=C[C@]1(C)C[C@@H](OC(=O)CS[C@@H]2CC[C@@H](N)C[C@H]2O)[C@]2(C)[C@H](C)CC[C@]3(CCC(=O)[C@H]32)[C@@H](C)[C@@H]1O	test
CN(C)c1ccc2c(-c3ccccc3)c3ccc(=[N+](C)C)cc-3oc2c1	test
c1cc(CCN2CCNCC2)cc(-c2ccc(-c3cccc(CCN4CCNCC4)c3)o2)c1	test
CC[C@@H](O)CCCOCCOC(=O)CCCC[C@@H]1SC[C@@H]2NC(=O)N[C@@H]21	test
Cc1cc(C)c2ccc(NCCN)nc2n1	test
COc1ccc(Nc2nc(N(C)C)c3ccccc3n2)cc1	test
CSCS(=O)CC(CO)NC(=O)C=Cc1c(C)[nH]c(=O)[nH]c1=O	test
Nc1ncc2ncn(C3OC(CO)C(O)C3O)c2n1	test
CC1(C)CC(Cc2ccc(-c3ccc(-c4cn[nH]c4)cc3O)nn2)CC(C)(C)N1	test
NCCSCC(N)C(=O)O	test
Cc1cn2cc(-c3cc(=O)n4cc(N5CCN(C)CC5)ccc4n3)cc(F)c2n1	test
CN(C)CCCN1c2ccccc2Sc2ccc(Cl)cc21	test
NCCN1CCN=C1c1ccc(C(=O)Nc2ccc(C3=NCCN3)cc2)cc1	test
COC(=O)C[C@](O)(CCCC(C)(C)O)C(=O)O[C@@H]1C(OC)=C[C@]23CCCN2CCc2cc4c(cc2[C@H]13)OCO4	test
Cc1cc(N)nc2ccccc12	test
O=C(NCCN1CCCC1)c1ccc2oc(C(=O)c3cc(O)c(O)c(O)c3)cc2c1	test
CS/C(=N\c1ccc(Cl)cc1)N1CC=Cc2ccccc21	test
C=CCc1cc(-c2nc3cc4[nH]c(=O)[nH]c4cc3[nH]2)cc(OCC)c1O	test
O=C1OC(c2ccc(O)cc2)(c2ccc(O)cc2)c2ccccc21	test
COc1ccc([C@@]23Oc4cc(OC)cc(OC)c4[C@]2(O)[C@H](O)[C@H](C(=O)N(C)C)[C@H]3c2ccccc2)cc1	test
CN(c1ccc(-c2ccc(-n3cc(CO)cn3)cc2O)nn1)C1CC(C)(C)NC(C)(C)C1	test
Cc1nc2ccc(NCCN(C)C)c3c(=O)c4cc(O)ccc4n1c23	test
NCCc1cc(N2CCC(N3CCC(O)CC3)CC2)ncn1	test
COc1ccc(Nc2c3sc4cc(OC)ccc4nc-3c3ccccc3c2=O)cc1	test
C(=N\NC1=NCCN1)\c1ccc2nc(-c3ccc(/C=N/NC4=NCCN4)cc3)cn2c1	test
Clc1ccc(Cc2ccccc2-c2ccc(-c3ccccc3Cc3ccc(Cl)cc3)o2)cc1	test
CC(C)NC(=O)Nc1nn(-c2ccc(F)cc2)c2cccc(OCCN(C)C)c12	test
c1ccc(CN2CCC(c3cccc(-c4ccc(-c5cccc(C6CCN(Cc7ccccc7)CC6)c5)o4)c3)CC2)cc1	test
COc1ccc2c(c1)N(CCCN(C)C)c1ccccc1S2	test
CCNc1nc(Nc2ccc(O)cc2)nc2ccccc12	test
CC[C@@H]1CN2CCc3cc(OC)c(OC)cc3[C@H]2C[C@H]1C[C@@H]1NCCc2cc(OC)c(OC)cc21	test
Nc1nc2c(ncn2[C@@H]2O[C@H](CO)[C@@H](O)[C@H]2O)c(=O)[nH]1	test
Cc1cccc(NCCN)n1	test
c1cncc(CCc2ccccc2-c2ccc(-c3ccccc3CCc3cccnc3)o2)c1	test
Cc1ccc2c(C)cc(N)nc2c1C	test
O=c1c2c(-c3ccoc3)csc2nc2n1Cc1nc3scc(-c4ccco4)c3c(=O)n1C2	test
Brc1ccc2nc(C3CCNCC3)[nH]c2c1	test
N[C@@H]1C[C@H](N)[C@@]2(CC[C@@H](Cn3cc(CO)nn3)O2)[C@H](O)[C@H]1O	test
CCc1nc(C)cn2nc(-c3cc(=O)n4cc(C5CCN(C)CC5)cc(C)c4n3)cc12	test
CC1(C)CC(Oc2ccc(-c3ccc(-n4cccn4)cc3O)nn2)CC(C)(C)N1	test
O=C(/C=C/c1ccccc1)N1CCN(C(=O)/C=C/c2ccccc2)c2ccccc21	test
COC(=O)C=CC1=NC(=Cc2cc(F)c(O)c(F)c2)C(=O)N1C	test
NCCCOc1ccc(-c2ccccn2)cc1CNCCC1CCNCC1	test
CCC1OC(=O)C(C)C(OC2CC(C)(OC)C(O)C(C)O2)C(C)C(OC2OC(C)CC(N(C)C)C2O)C(C)(OC)CC(C)C(=O)C(C)C(O)C1(C)O	test
c1ccc(-c2ccc(-c3ccccc3CCc3ccsc3)o2)c(CCc2ccsc2)c1	test
CC1c2cccc(O)c2C(O)=C2C(=O)C3(O)C(O)=C(C(N)=O)C(=O)C(N(C)C)C3C(O)C21	test
CN(C)c1nc(N)c(C(=O)NC(=N)N)nc1Cl	test
CNc1nc(Nc2cccc(O)c2)nc2ccccc12	test
COC(=O)[C@@H](N)CCCN=C(N)N	test
c1cncc(CCc2ccc(-c3ccc(-c4ccc(CCc5ccncc5)cc4)o3)cc2)c1	test
CCOC(=O)CCCOc1cc(-c2nc3ccc(N)cc3[nH]2)cc(-c2nc3ccc(N)cc3[nH]2)c1	test
N=C(N)NC(=O)c1nc(-c2ccccc2)c(NCc2c[nH]c3ccccc23)nc1N	test
COc1ccc(-c2nc3ccccc3[nH]2)cc1OC	test
CCC1CN(c2ccc(C(=O)Nc3cn4cc(C)nc4cn3)c(F)c2)CCN1	test
CN(c1ccc(-c2cc3ccccc3cc2O)nn1)C1CC(C)(C)NC(C)(C)C1	test
C=C1CC[C@H]2C(C)(C)[C@H](Cl)[C@@H](Cl)C[C@]2(C)[C@H]1C[C@H](O)[C@H]1CC(=O)NC1=O	test
Cc1cccc(-c2nnc(-c3nc(NCCN4CCOCC4)c4ccccc4n3)o2)c1	test
O=C1C=C(O)C=C2OC(c3ccc(O)cc3)C(=O)C(O)=C12	test
CC(C)CC(=O)Nc1ccc(Nc2nc(N3C[C@H](N)C[C@@H](N)C3)nc(N3C[C@H](N)C[C@H](N)C3)n2)cc1O	test
N=C(N)c1ccc(OCCOc2cccc(N)c2)cc1	test
c1ccc(CCc2cccc(-c3ccc(-c4cccc(CCc5ccccc5)c4)o3)c2)cc1	test
Oc1cc(-c2cn[nH]c2)ccc1-c1ccc(N2CC3CNCC3C2)nn1	test
c1ccc(-c2nnc(-c3nc(NCCCCN4CCC(N5CCCCC5)CC4)c4ccccc4n3)o2)cc1	test
CC1(C)CC(Nc2ccc(-c3cc4ccccc4s3)nn2)CC(C)(C)N1	test
N[C@@H](Cc1c[nH]c2ccccc12)C(=O)O	test
Nc1nnc(CCCNc2nccc(-c3ccncc3)n2)s1	test
CC(=O)NCC1CN(c2ccc(-c3ccc(CNCc4cn[nH]n4)cc3)c(F)c2)C(=O)O1	test
O=C1NC(=O)N(C2=C=C=C(Br)C=C2)C(=O)/C1=C/NCCN1CCNCC1	test
CN(C)CCCCNC(=N)c1ccccc1-c1ccc(-c2ccccc2C(=N)NCCCCN(C)C)o1	test
CN(C)CCCn1c(N)nc2ccc3c(c21)CC(CN(C)C)CO3	test
Cc1cc2nc3c(=O)[n-]c(=O)nc-3n(CCC(C)c3ccc(F)cc3)c2cc1C	test
N[C@@H]1C[C@H](N)CN(c2nc(Nc3ccc(NC(=O)c4cc5ccccc5cc4O)cc3)nc(N3C[C@@H](N)C[C@H](N)C3)n2)C1	test
CN(C)c1ccc2c(-c3ccc(C(=O)NCC4OC(OC5C(N)CC(N)C(OC6OC(CO)C(O)C(N)C6O)C5O)C(N)CC4O)cc3C(=O)O)c3ccc(=[N+](C)C)cc-3oc2c1	test
Oc1cc(-c2cn[nH]c2)ccc1-c1ccc(N2CCC3(CCCNC3)C2)nn1	test
NCCOc1ccc2oc3ccccc3c2c1	test
N[C@@H]1C[C@H](N)[C@@H](OCSc2ccnc3cc(C(F)(F)F)ccc23)[C@H](O)[C@@H]1O	test
N=C(N)c1ccc(-c2ccc(-c3ccc(-c4ccc(C(=N)N)cn4)o3)o2)nc1	test
Clc1ccc2c(c1)N(CCn1ccnc1)c1ccccc1S2	test
Cc1ccc(S(=O)(=O)Cn2c(C3CCNCC3)nc3cc(Cl)c(Cl)cc32)cc1	test
NC/C=C/CC(N)C(=O)O	test
COc1cc2nc(N3CCN(C(=O)C(C)C)CC3)nc(N)c2cc1OC	test
CN[C@H]1C[C@@H](O[C@H]2[C@H](O)[C@@H](O[C@@H]3CCC[C@@H](CN)O3)[C@H](N)C[C@H]2NS(=O)(=O)C(F)(F)F)OC[C@]1(C)O	test
Nc1ncnc2c1ncn2C1OC(CC(N)CCC(N)C(=O)O)C(O)C1O	test
O=c1ccn([C@@H]2O[C@H](CO)[C@@H](O)[C@H]2O)c(=O)[nH]1	test
Cc1ccc2nc(Nc3ccc4nc(NCCOCc5ccccc5)sc4c3)nc(NCCCO)c2c1	test
Nc1c(S(=O)(=O)O)cc(Nc2ccc(S(N)(=O)=O)cc2)c2c1C(=O)c1ccccc1C2=O	test
Nc1nc(=O)c2c([nH]1)NCC(C(O)C(O)CO)=N2	test
O=C1NC(=S)SC1=Cc1cc([N+](=O)[O-])ccc1Sc1ccc(C(F)(F)F)cn1	test
CC1=C2C(CCC(N)=O)C(C)(CC(N)=O)C3(C)C4C(CC(N)=O)C5(C)CCC(=O)NCC(C)OP(=O)(O)OC6C(CO)OC(n7cn(->[Co]89(CC%10OC(n%11cnc%12c(N)ncnc%12%11)C(O)C%10O)(N23)<-N2=C(C=C3C(CCC(N)=O)C(C)(CC(N)=O)C1=N->83)C(C)(C)C(CCC(N)=O)C2=C(C)C5=N->94)c1cc(C)c(C)cc17)C6O	test
N=C(N)NCCCCNCc1cc(-c2ccsc2)ccc1OCCCN	test
Clc1ccc(Cc2cccc(-c3ccc(-c4cccc(Cc5ccc(Cl)cc5)c4)o3)c2)cc1	test
Cc1ccc(C(=O)N2CCN(CCNC(=O)C(=O)NC(C)C)CC2)cc1	test
CN1CCN(c2ccc(-c3ccc4ccccc4n3)c(N3CCN(C)CC3)c2N2CCN(C)CC2)CC1	test
Clc1ccccc1Cc1ccccc1-c1ccc(-c2ccccc2Cc2ccccc2Cl)o1	test
COc1cc(NCCCC(C)N)c2cc(OC)ccc2c1	test
COc1ccc(NCC(O)Cn2c3ccc(Br)cc3c3cc(Br)ccc32)cc1	test
CC(=O)c1c(O)c(C)c(O)c2c1OC1=CC(=O)/C(=C(/C)NCCCCN)C(=O)C12C	test
Cc1cc(N2CCN(C(=O)CCc3cc4n(n3)CCNC4)CC2)nc(N)n1	test
O=C1ON=C(c2ccccc2)C1=Cc1ccc2c(c1)OCO2	test
CN1CCN(c2ccc(-c3ccc4nc(-c5ccc(OCCCC(=O)NCCCN=[N+]=N)cc5)[nH]c4c3)cc2)CC1	test
N[C@H]1[C@H](O[C@@H]2C=Cc3ccccc3[C@@]23C(=O)O[C@@H]2C(=O)c4cc5ccccc5cc4[C@@H]23)O[C@@H](CO)[C@@H](O)[C@@H]1O	test
COc1ccc(-c2ccc3c(c2)C(=Cc2sc4ccccc4[n+]2C)C=CN3C)cc1	test
O=C1c2cc(NCCCN3CCOCC3)c3c4c(cc(NCCCN5CCOCC5)c(c24)C(=O)N1CCCN1CCOCC1)C(=O)N(CCCN1CCOCC1)C3=O	test
O=C(Nc1cccc(C2=NCCN2)c1)c1cccc(C(=O)Nc2cccc(C3=NCCN3)c2)c1	test
NCCCNC(=O)C(Cc1ccc2ccc(N)nc2n1)Cc1ccc2ccc(N)nc2n1	test
NCCCC[C@H](N)C(=O)N[C@H](CO)[C@H](O)c1ccc([N+](=O)[O-])cc1	test
CN(C)c1ccc(C(=C2C=CC(=[N+](C)C)C=C2)c2ccccc2)cc1	test
Nc1nc(=O)c2c([nH]1)NCC(CNc1ccc(C(=O)NC(CCC(=O)O)C(=O)O)cc1)=N2	test
c1ncc2[nH]c(C3CCNCC3)nc2n1	test
Cc1ncc(CN=[N+]=[N-])c(N)n1	test
O=C1NC(=S)N/C1=C/c1ccc2ccccc2c1	test
NC(N)=NC[C@H](N)C(=O)O	test
NC(=O)[C@@H](N)CCCN=C(N)N	test
Fc1nc(N2CCNCC2)c(F)c(Sc2ccc(Cl)cc2)c1F	test
CN(C)c1ccc(O)c2c1CC1CC3C(N(C)C)C(=O)C(C(N)=O)=C(O)C3(O)C(=O)C1=C2O	test
O=c1oc2cc(N3CCNCC3)ccc2cc1-c1cn2ccccc2n1	test
COC(=O)c1ccc(Cn2c(C3CCNCC3)nc3cc(Cl)c(Cl)cc32)cc1	test
CCC1OC(=O)C(C)C(OC2OC(C)CC(N(C)C)C2O)C(C)CC(C)C(=O)C=CC1(C)O	test
O=C(Nc1ccc(NC(=O)c2ccc(F)cc2)nc1)c1ccncc1	test
CC(=O)Nc1nc(=O)c2nc[nH]c2[nH]1	test
C[N+]1(C)C2CC(OC(=O)C(CO)c3ccccc3)CC1C1OC12	test
C[C@H]1CCCCN1CCCNC(=N)c1cccc(-c2ccc(-c3cccc(C(=N)NCCN4CCCC4)c3)s2)c1	test
CS[C@H]1O[C@H]([C@H](NC(=O)c2ccc([N+](=O)[O-])cc2)[C@@H](C)O)[C@H](O)[C@H](O)[C@H]1O	test
CCCN(CCC)Cc1ccc(C(=O)N2CCOC(CCN)C2)cc1	test
CC(=O)NC[C@H]1CN(c2ccc(-c3ccc(CN)cc3)c(F)c2)C(=O)O1	test
Nc1nc(=O)c2ncn(C3CC(O)C(CO)O3)c2[nH]1	test
Cc1ccccc1Nc1nc(NCCCO)c2ccccc2n1	test
CC(=O)Nc1nc(-c2cccc(NC(=O)[C@@H](N)Cc3c[nH]cn3)c2)cs1	test
COc1cc(-c2nc3ccc([N+](=O)[O-])cc3[nH]2)ccc1O	test
O=[N+]([O-])c1ccc2nc(-c3ccncc3)[nH]c2c1	test
CN(C)CCCNC(=N)c1ccc(C(=N)NCCCN(C)C)cc1	test
CC(C)[C@H](NC(=O)[C@@H](CO)NC(=O)CCCN)C(=O)NCc1ccc(Nc2c3ccccc3nc3c(C(=O)N[C@H](CCCNC(=N)N)C(N)=O)cccc23)cc1	test
O=[N+]([O-])c1ccc(SCCO)c2ncccc12	test
CN(C)CCCNc1nc2cc([N+](=O)O)ccc2nc1NCCCN1CCN(C)CC1	test
Nc1ncnc2c1ncn2[C@@H]1O[C@H](COP(=O)(O)O)[C@@H](N)[C@H]1O	test
CN(C)CCCNc1nc(N)nc(NCCCCCCNC(=O)CC2=CCC(NC(=O)CC3=CCC(NC(=O)CCCCCCNc4nc(N)nc(N)n4)=N3)=N2)n1	test
COc1cc(N)cc2ccccc12	test
NC1C(O)OC(COP(=O)(O)O)C(O)C1O	test
O=C(NCCCN1CCCCC1)c1c(O)c2ccccc2[nH]c1=O	test
NC(=O)c1nc[nH]c1N	test
N=C(NCCCc1c(N)nc(N)nc1N)c1cccc(C(=N)NCCCc2c(N)nc(N)nc2N)c1	test
CC1=C2N3->[Co]456(O)N7C(=C(C)C8=N->4C(=CC=3C(C=CC(N)=O)C2(C)CC(N)=O)C(C)(C)C8CCC(N)=O)C(C)(CCC(=O)NCC(C)OP(=O)(O)OC2C(CO)OC(n3cn->5c4cc(C)c(C)cc43)C2O)C(CC(N)=O)C7C2(C)N->6=C1C(CCC(N)=O)C2(C)CC(N)=O	test
CN1CCN(C2=C=C=c3nc(C4=C=C=c5[nH]c(C6=C=C=C(O)C=C6)nc5=C4)[nH]c3=C2)CC1	test
Clc1cc2nc(C3CCNCC3)n(Cc3cccnc3)c2cc1Cl	test
Cc1cc2nc3c(=O)[nH]c(=O)nc-3n(CC(O)C(O)C(O)COP(=O)(O)OP(=O)(O)OCC3OC(n4cnc5c(N)ncnc54)C(O)C3O)c2cc1C	test
CNC(=N)NN=C(C)c1ccc2sc3ccc(C(C)=NNC(=N)NC)cc3c2c1	test
CN(C)c1nc(N)c(C(=O)N=C(N)N)nc1C#Cc1ccccc1	test
Cc1ccc2[nH]c3c(=O)n(CCN4CCCC4)cnc3c2c1	test
COc1ccc(CC(N)C(=O)NC2C(CO)OC(n3cnc4c(N(C)C)ncnc43)C2O)cc1	test
Cc1cc(N2CCN(C)CC2)n2nc(-c3ccc(Cl)cc3)nc2n1	test
NCCCOc1ccc(-c2ccc3[nH]ccc3c2)cc1CNCCN1CCNCC1	test
COC(=O)c1c(OC)cc2cc3c(c(O)c2c1C)C(=O)[C@]1(OC)C(=O)C=C(OC)[C@@H](O)[C@]1(O)C3=O	test
CCOc1ccc(NCC(O)Cn2c3ccc(Br)cc3c3cc(Br)ccc32)cn1	test
NCCCSCC1OC(n2cnc3c(N)ncnc32)C(O)C1O	test
CC[C@@]1(O)C(=O)OCc2c1cc1n(c2=O)Cc2cc3c(CN(C)C)c(O)ccc3nc2-1	test
NC(N)=NCCC[C@@H](N)C(=O)O	test

## Sheet: Dataset_4
Infromation of 3,767 compounds from the negative dataset
SMILES	Category
N=CC1(NC(=O)[C@@H]2C[C@@H](S(=O)(=O)c3ccccc3C(F)(F)F)CN2)CC1	train
C#CCCCn1c(Cc2cc(OC)c(OC)c(OC)c2Cl)nc2c(N)nc(F)nc21	train
CC(=O)c1ccc(NC(=O)CS)cc1	train
NC(=O)c1[nH]c2ccc(Cl)cc2c1-c1ccccc1	train
O=P(O)(O)OC[C@@H](O)[C@@H](O)[C@H](O)CO	train
CC[C@@H](C)[C@H](NC(=O)c1ccc(F)cc1)C(=O)N[C@@H](COP(=O)(O)N[C@@H](CCC(=O)O)C(=O)O)C(=O)O	train
O=C(N[C@@H](CCCCNC(=O)c1ccc(I)cc1)C(=O)O)N[C@H](C(=O)O)c1ccc(O)cc1	train
CC1(CN)CCN(c2ncc(Sc3cccnc3C(F)(F)F)c(=O)[nH]2)CC1	train
Cc1c(-c2c(-c3ccc(F)cc3)sc3ncnc(O[C@H](Cc4ccccc4OCc4cnccn4)C(=O)O)c23)ccc(OCCN2CCN(C)CC2)c1Cl	train
Cc1ccc(-c2nc3c(C)cccc3c(=O)[nH]2)cc1	train
CC#CCOc1ccc(CNS(N)(=O)=O)cc1	train
CCN(CC)CCNc1cc(Nc2cc(O)ccc2C)nc(-n2cnc3ccccc32)n1	train
CC(C)c1onc(-c2ccccc2Cl)c1C(=O)N[C@H](C)c1ccc2ccccc2c1	train
NCCOCCOCCNC(=O)c1ccc(S(N)(=O)=O)cc1	train
CC(C)[C@H](NC(=O)[C@H](Cc1cscn1)NC(=O)CCc1ccccc1)C(=O)N[C@@H](CCCN=C(N)N)[C@H](O)c1nc2ccccc2s1	train
CC(=O)c1ccc2c(Nc3ccccc3)ncnc2c1	train
Cc1cc(N)nc(C[C@@H]2CNC[C@@H]2OCCCCCc2cc(F)cc(Cl)c2)c1	train
Cc1ccc(Cl)cc1-c1[nH]c(-c2ccnc(N)n2)cc1C(N)=O	train
O=c1[nH]c(N2CCC3(CC2)CN(CCO)c2cc(F)cc(F)c23)nc2c1CCCC2	train
O=C(O)CCCCP(=O)([O-])Oc1ccc([N+](=O)[O-])cc1	train
CC(C)(C)c1ccc(C2=CC=CN3CCS(=O)(=O)N=C23)cc1	train
O=C(N[C@@H]1c2ccccc2-c2c(-c3nc4ccncc4[nH]3)cccc21)c1ccncc1	train
CN1Cc2nc(C(=O)N[C@@H]3C[C@@H](C(=O)N(C)C)CC[C@@H]3NC(=O)c3cc4ccc(Cl)cc4cn3)sc2C1	train
O=C(O)c1cccc(Nc2nc(-c3ccccn3)cs2)c1	train
COc1c(CN2CCC[C@H](n3cc(C)c(=O)[nH]c3=O)C2)ccc(C(=O)O)c1Oc1cccc(Cl)c1	train
CNc1cc(F)cc2c1[nH]c1ncc(-c3cnc(C4(C(=O)O)CC4)nc3)c(-n3ccc(C(F)(F)F)n3)c12	train
Nc1ncnc2c1ccn2[C@@H]1O[C@H](CO)[C@@H](O)[C@H]1O	train
CCCC[C@H](NC(=O)[C@H](C)NC(=O)[C@H](CCC(=O)O)NC(=O)[C@H](Cc1ccccc1)NC[C@H](CC(C)C)NC(=O)[C@@H](NC(=O)[C@@H](N)CCCN=C(N)N)C(C)C)C(N)=O	train
CCCc1ccc(-c2ccc(S(=O)(=O)CCO)cc2)cc1[C@H]1C[C@H]1c1ccccn1	train
Cn1cc(-c2ccc3nnc(C(F)(F)c4ccc5nc(NC(=O)C6CC6)cn5n4)n3c2)cn1	train
O=C(CN1C(=O)C2(CCN(C(=O)c3ccc4[nH]ncc4n3)CC2)c2c(Br)cccc21)NCC(F)(F)F	train
C[C@H](N)P(=O)(O)C[C@H](CC(=O)O)C(=O)O	train
Cc1ccc(NC(=O)c2cccc(C(F)(F)F)c2)cc1-c1ccc2nc(NC3CC3)ncc2c1	train
N#Cc1cccc(-n2cc(-c3ccc(S(N)(=O)=O)s3)nn2)c1	train
C[C@](O)(COc1ccc([N+](=O)[O-])cc1)[C@@H](O)Nc1ccc(C#N)c(C(F)(F)F)c1	train
Nc1nc(N)c2c(Sc3ccccc3)cccc2n1	train
CC1=C(/C=C/C(C)=C/C=C/C(C)=C/C=O)C(C)(C)CCC1	train
CN(C)CCOc1ccc(Oc2ccccc2)cc1	train
O=C(O)c1ccc(CN2C(=O)C3(CCN(S(=O)(=O)c4ccccc4Cl)CC3)c3cc(Br)ccc32)cc1	train
CN1CCN(c2ccc(Cc3cc4cnc(CN)nc4n3C3CCCCC3)cc2)CC1	train
NC1=Nc2cc(OCCCN3Cc4ccccc4C3)c(OCC3CC3)cc2C12CCCC2	train
CO[C@H]1CNC[C@@H](OCC2CCC(F)(F)CC2)[C@@H]1Nc1ncc(-c2cncc(C)c2)c2cc(C)c(=O)[nH]c12	train
Cc1c(-c2c([C@H](OC(C)(C)C)C(=O)O)n(C)c(=O)c3ccccc23)cc(F)c2c1CCCO2	train
O=C(Nc1ccc(N(Cc2ccsc2)C(=O)Cn2nnc3ccccc32)cc1)c1cccs1	train
Cc1o[nH]c(=O)c1C[C@H](N)C(=O)O	train
CC[C@H](Nc1nc(NCc2cccnc2)c2ncn(C(C)C)c2n1)[C@@H](C)O	train
CC1(C)CCC(C)(C)c2cc([C@@H](O)c3ccc4cc(C(=O)O)ccc4c3)ccc21	train
COc1cc2c(cc1OCCCN1CCCC1)N=C(N)C21CCC1	train
CC(C)C[C@H](O)[C@H](O)[C@H](CC1CCCCC1)NC(=O)[C@H](CC1CC1)C[C@H](O)[C@@H](O)Cc1ccccc1	train
O=C(O)CC[C@H](NC(=O)N[C@@H](CCCCn1cc(COCCOCCOCCOCCOCCOCCOCCOCCNc2ccc([N+](=O)[O-])cc2[N+](=O)[O-])nn1)C(=O)O)C(=O)O	train
Cc1nc(F)ccc1-c1cc(Cn2ccn(C)c2=N)cc(C(=O)NCc2ccc(Cl)c(Cl)c2)c1	train
N[C@H](COc1cncc(/C=C/c2ccncc2)c1)Cc1c[nH]c2ccccc12	train
Nc1ncnc2c1ncn2[C@@H]1O[C@H](COP(=O)(O)OP(=O)(O)O[C@H]2C[C@H](n3ccc(=O)[nH]c3=O)O[C@@H]2COP(=O)(O)O)[C@@H](OP(=O)(O)O)[C@H]1O	train
Cn1cnc(-c2cnc(O[C@H]3CCN(C(=O)Cc4ccc(OC(F)(F)F)cc4)C[C@H]3F)c(C(N)=O)c2)c1	train
COc1ccc(-c2nc(CSc3nc(N)cc(N)n3)c(C)s2)cc1OCCF	train
CNCc1ccc(-c2cccnc2)o1	train
CC(=O)Nc1ccc(S(=O)(=O)Nc2ccc(Oc3ccc4ccccc4c3)c(C#N)c2)cc1	train
O=C(Nc1ccc(Cl)cn1)[C@H]1CN(CC(F)F)C[C@@H]1C(=O)Nc1ccc(-n2ccccc2=O)cc1F	train
CC1(C)OC(=O)N(C2CCC(c3cnc(N)c(-c4ncccn4)c3)CC2)[C@H]1c1ccccc1	train
CC(C)C(=O)Nc1nnc(S(N)(=O)=O)s1	train
O=C(O)CCc1ccc(OC2CCN(C(=O)NC3[C@@H](c4ccccc4)[C@H]3c3ccccc3)CC2)cc1	train
CC(C)CN1CCc2c(ccc3[nH]ncc23)[C@H]1c1ccc(CCC(=O)O)cc1	train
CC1(C)CN=C2[C@@H](O)c3cc(S(=O)(=O)N4CCC[C@H]4COc4ccccc4)ccc3N2C1	train
N#Cc1ccc(N(Cc2ccc(OS(N)(=O)=O)c(Br)c2)n2cnnc2)cc1	train
Cc1nn(C)c(C)c1Cc1nnc(-c2sc3ccccc3c2OC2CCNCC2)o1	train
Nc1ccccc1Nc1ccc(C(=O)c2ccccc2)cc1	train
Cc1cc(C)n(COC(=O)N[C@@H](CS(C)(=O)=O)C(=O)N[C@@H](CC(C)C)[C@@H](O)C[C@@H](C)C(=O)N[C@H](C(=O)NCC(C)C)C(C)C)n1	train
Cc1nnc2n1-c1ccc(-c3cnn(C)c3)cc1[C@H](Nc1ccc(Cl)cc1)CC2	train
COc1cc(CN2C(=O)N(Cc3ccc(O)c(OC)c3)N(Cc3ccccc3)C[C@@H](O)[C@H]2Cc2ccccc2)ccc1O	train
COc1ccc(S(=O)(=O)Nc2ccc(N(CC(=O)O)S(=O)(=O)c3ccc(OC)cc3)c3ccccc23)cc1	train
CC(C)Nc1cc(NC2CCC(N)CC2)nc2c(C#N)cnn12	train
O=C1c2cc(-c3ccnc(N[C@H]4CC[C@@H](O)C4)n3)cn2CCCN1[C@H](CO)c1cccc(Cl)c1	train
CC(C)(O)Cn1nc(-c2ccc3nc(OC4CC4)ccc3c2)c2c(N)ncnc21	train
CC1(C)CC(=O)c2c(C(F)(F)F)nn(-c3ccc(C(N)=O)c(NC4CCC(O)CC4)c3)c2C1	train
C[C@@H]1C[C@H]1CNC(=O)[C@@H]1C[C@H]1[C@]12CN(c3ncccn3)C[C@H]1CSC(N)=N2	train
CCc1cccc2c(C3CCNCC3)c[nH]c12	train
C[C@@]1(c2cccc(Nc3cccc4cc(Cl)cnc34)c2)COCC(N)=N1	train
O=C1NS(=O)(=O)CCOCCCCCCN2C[C@@]3(CCc4cc(Cl)ccc43)COc3ccc1cc32	train
N#Cc1cnn2c(Nc3ccccc3)nc(NCc3ccc(Cl)cc3)nc12	train
CCCCn1ccc(=O)c2c(N)nc(-c3ccccc3)cc21	train
Cc1nc([C@@H](NC(=O)c2ccc(-c3ccc(Cl)cc3)[nH]2)[C@H]2CCCCN2)sc1CO	train
COc1cc2c(cc1-c1c(C)noc1C)ncc1[nH]c(=O)n([C@H](C)c3ccccn3)c12	train
CC(C)(O)c1ccc2c(c1)[nH]c1c(C(N)=O)ccc(-c3cccc(-n4cnc5ccccc5c4=O)c3F)c12	train
Cc1cccc(CNC(=O)c2cc(C(=O)NCc3cccc(C)c3)ncn2)c1	train
O=C(O)/C(S)=C/c1c(Cl)ccc(Cl)c1Cl	train
CC(C)N1CCC(c2cc(-c3ccc(F)cc3Cl)c3c(c2)N(c2c(Cl)cccc2Cl)C(=O)NC3)CC1	train
COc1ccc(S(=O)(=O)Nc2cc(C(=O)O)ccc2F)c2ccccc12	train
Cc1cccnc1CN1CCC2(CC1)C(=O)N(c1ccc(-c3ccccc3)cc1)C(=O)N2c1ncccn1	train
CCC(=O)N[C@@H]1CN(c2nc(Nc3cn(C)nc3OC)c3ncn(C(C)C)c3n2)C[C@H]1F	train
CN1c2ccc(-c3ccc(C(=O)N4CCC(CCO)CC4)cc3)cc2-c2[nH]ncc2S1(=O)=O	train
Clc1cc(Cl)c2n[nH]nc2c1	train
O=C1Nc2ccc(F)cc2C1=O	train
NS(=O)(=O)c1ccc(C(=O)NCc2ccccc2)cc1	train
NS(=O)(=O)c1ccc(NC(=O)c2ccc([N+](=O)[O-])cc2Cl)cc1	train
CC(C)(C)NC(=O)[C@@H]1CCCCN1C[C@@H](O)[C@@H]1Cc2ccc(cc2)OCCCC(=O)N[C@@H](CC(N)=O)C(=O)N1	train
CCC(=O)O[C@@H]1[C@@H](OC(=O)CC)[C@H](O)O[C@H](COS(N)(=O)=O)[C@H]1OC(=O)CC	train
Cc1cc(N)nc2cc(-c3ccc(OCc4cccnc4)c(CN)c3)ccc12	train
Nc1ccc(F)c(C(=O)c2c[nH]c3ncc(Cl)cc23)c1F	train
Cc1nnn2c1-c1ccc(-c3ccc(N)nc3)cc1N(c1ccc(Cl)cc1)CC2	train
O=CN1C[C@H](NOS(=O)(=O)O)CC[C@H]1C(=O)NC1CCNCC1	train
C=C1[C@H](O)CC(=C/C=C2\CCC[C@]3(C)/C(=C(\C)CCCC(C)(C)O)CC[C@@H]23)C[C@H]1O	train
O=C(NO)c1ccc(CC(=O)N(CCO)c2ccccc2)cc1	train
CC(C)(C)NC(=O)Cc1ccc(Cl)cc1-n1c(C2CCCCC2)nc(-c2nn[nH]n2)c1-c1ccc(F)c(Cl)c1	train
O=C(/C=C/c1ccc(Sc2ccccc2OCc2cccnc2)c(C(F)(F)F)c1C(F)(F)F)N1CCOCC1	train
COC[C@@H]([C@H](O)[C@H](O)C(=O)NCC[C@H](C)c1nc(/C=C/C[C@@H]2O[C@]3(C[C@@H](O)[C@@H]2C)O[C@H]([C@H](C[C@H](O)[C@H](C)[C@H](O)[C@H](C)/C=C(C)/C(C)=C/C=C/C(C)=C\C#N)OC)[C@H](OP(=O)(O)O)C3(C)C)co1)N(C)C	train
CCN1CCN(c2nc(Nc3ccccc3)n3ncc(C#N)c3n2)CC1	train
CC[C@@H](N)C(=O)N1CCC[C@H]1C(=O)NCc1ccc(C(=N)N)cc1	train
NS(=O)(=O)c1ccc(NC(=O)CC23CC4CC(CC(C4)C2)C3)cc1	train
O=C(O)/C(O)=C/C(=O)C1(Cc2ccc(Cl)cc2)CCN(Cc2ccccc2)CC1	train
O=[N+]([O-])c1cc(C(F)(F)F)ccc1NCc1ccsc1	train
COc1ccc2c(c1)c(=O)c1c(NCCN(C)C)ccc3ncn2c31	train
NS(=O)(=O)c1cc(-c2ccccc2)cc(-c2ccccc2)c1	train
C[C@H](CCC[C@@H](C)CC(=O)O)CC[C@H]1[C@@H](C)CC=CC1(C)C	train
O=C(N[C@H]1c2ccccc2C[C@H]1O)[C@H](OCc1cccc(F)c1)[C@H](O)[C@@H](O)[C@@H](OCc1cccc(F)c1)C(=O)N[C@H]1c2ccccc2C[C@H]1O	train
NS(=O)(=O)c1ccc(N=NN2CCCCCC2)cc1	train
NS(=O)(=O)c1c(F)c(F)c(F)c(F)c1F	train
CONC(=O)c1cn(C2CCCCC2)c2nc(Nc3ccc(CCN4CCCC4)cc3)ncc2c1=O	train
COc1ccccc1-n1c(-c2cc(O)ccc2C)cn2c3c(=O)[nH]c(=O)n(C)c3nc12	train
O=NC(=O)/C=C/c1ccc(NNc2ccccc2)cc1	train
O=c1[nH]c(-c2cccc(O)c2)nc2ccccc12	train
O=C(NCCCNC(=O)c1cc(-c2n[nH]c3ccc(NC(=O)[C@@H]4CCN(CC(=O)N5CCN(c6ccc(-c7ncccn7)cc6)CC5)C4)cc23)ccn1)OC1CCCCCCC1	train
O=C1N[C@@H](Cc2ccc(O)c(I)c2)C(=O)N[C@H]1Cc1ccc(O)cc1	train
Nc1nc2c(ncn2[C@@H]2CN(C(=O)CCP(=O)(O)O)C[C@H]2OC[C@@H](O)P(=O)(O)O)c(=O)[nH]1	train
NS(=O)(=O)c1c(F)c(F)c(S(=O)(=O)CCO)c(NCc2ccccc2)c1F	train
O=C1c2ccc(O)c(O)c2C(=O)c2c(O)ccc(O)c21	train
N#Cc1ccc(Cn2nccc2-c2cc(Cl)c3nnn(-c4ccc5cn[nH]c5c4)c3c2)cc1	train
COc1nc2[nH]cc(C(=O)C(=O)N3CC[C@@H](O)C3)c2cc1C(=O)N1CCn2c(cnc2-c2ccc(F)cc2F)C1	train
CO[C@H]1C[C@H](C)Cc2cc(O)cc(c2)NC(=O)/C(C)=C/CC[C@H](C)[C@@H](OC(N)=O)/C(C)=C/[C@H](C)[C@H]1O	train
CNC[C@@H](O)COc1ccc(Cl)c(-c2nc(-c3c(C)noc3C)c(C)c(N3CC4(CCN(C(=O)OC)CC4)C3)n2)c1	train
CC(C)[C@H](NC(=O)[C@H](Cc1cccc2ccccc12)CS(=O)(=O)C(C)(C)C)C(=O)N[C@H](CO)Cc1ccccc1	train
CCc1c(C)nc(-c2ccc(Cl)s2)nc1Nc1ccc(CC(=O)O)cc1	train
NS(=O)(=O)C(F)(F)C(F)(F)C(F)(F)C(F)(F)F	train
O=C(Nc1ccc(OC(F)(F)F)cc1)N(Cc1cccc(-c2nccs2)c1)C1CC1	train
CC(=O)N1c2ccc(C3=CCNCC3)cc2N(Cc2ccccc2CO)C[C@@H]1C1CC1	train
COc1cnc(C(=O)Nc2ccc(F)c([C@@]3(C)N=C(N)O[C@@H]4C[C@@H]43)c2)cn1	train
CO[C@H](COS(=O)(=O)O)C(=O)N[C@@H](C(=O)N1[C@H](C(=O)NCCC2=CCN(C(=N)N)C2)C[C@@H]2C[C@H](O)[C@@H](O)C[C@@H]21)[C@H](Cl)C(C)C	train
O=c1[nH]c2ccccc2n1-c1ccc(O)cc1O	train
NS(=O)(=O)c1ccc(N=Nc2c(O)[nH]c3ccc(C(=O)O)cc23)cc1	train
CN1CCN(c2ccc(C(=O)Nc3n[nH]c4ccc(Cc5cc(F)cc(F)c5)cc34)c(NC3CCC(O)CC3)c2)CC1	train
Cc1ccc(-c2cc3c(ccc[n+]3C)c(=O)[nH]2)cc1	train
CN(O)C(=O)C[C@@H](CCCc1cccc2ccccc12)CP(=O)(O)O	train
O=S(=O)(Nc1ccc(O)c(-c2c(O)ccc3ccccc23)c1)c1cc(Cl)ccc1Cl	train
O=C(CCc1ccc2ccc3ncc(-c4cnn(C5CCNCC5)c4)cc3c(=O)c2c1)NCc1ccccn1	train
N#CCCc1ccc(-c2nc3cnc4[nH]ccc4c3n2C2CCCCC2)o1	train
CC(C)c1ccc(N(C)c2cnc3nc(N)nc(N)c3c2)cc1	train
Cn1c2c(c(=S)n(C)c1=O)N[C@H](SCCN1CCOCC1)N2	train
NS(=O)(=O)c1ccc(O)cc1	train
O=C(NCc1ccccn1)c1ccc(-n2cc(-c3ccncc3)cn2)cc1	train
CCCCNS(=O)(=O)c1ccccc1	train
C=CC(=O)Nc1cccc(-c2c[nH]cc2CN(C)CCN)c1	train
CCS(=O)(=O)c1ccc(CC(=O)Nc2nc(-c3ccccc3)c(C(=O)c3ccccc3)s2)cc1	train
O=C(O)c1cccc(/C=C/c2ccc(B(O)O)cc2Cl)c1	train
OC[C@H]1O[C@H](NC2=N[C@@H]3[C@H](S2)[C@@H](O)[C@H](O)[C@]3(O)CO)[C@H](O)[C@@H](O)[C@@H]1O	train
N[C@H]1CCc2c(Br)ccc(Br)c2CC1(O)O	train
CNCCN(C)c1cc(CCc2cc(C)cc(N)n2)cc(C(F)(F)F)c1	train
CCS(=O)(=O)Nc1ccc2c(c1)C(C(=Nc1ccc(CN3CCCCC3)cc1)c1ccccc1)C(=O)N2	train
COc1ccc(-c2cn(C)c(=O)c3cc(C(=O)NC4CCS(=O)(=O)CC4)sc23)cc1OC	train
c1ccc(-c2[nH]c3ccccc3c2Cn2ccnc2)cc1	train
C[C@H](Nc1nccc(-c2c(-c3ccc(F)cc3)c(=O)n(C3CCNCC3)n2C)n1)c1ccccc1	train
O=CN(O)[C@@H](CCCc1ncccn1)CS(=O)(=O)N1CCN(c2ccc(Br)cn2)CC1	train
COc1ccc(C[C@H](NC(=O)[C@@H](CS)CC(C)C)C(=O)O)cc1	train
O=C(O)CC[C@H](NP(=O)(O)OCCCCc1ccccc1)C(=O)O	train
Cc1n[nH]c(C)c1S(=O)(=O)Nc1ccc2cn[nH]c2c1	train
N=C(N)c1ccc2cccc(N)c2c1	train
Cc1cc(C)c2c(c1)S(=O)(=O)NC(=O)N2	train
O=C(Nc1cnn(-c2cccc(C(=O)Nc3cnn([C@H]4CCNC4)c3)c2)c1)Nc1ccccc1Cl	train
O=C(O)C[C@@](O)(CF)CCOP(=O)(O)OP(=O)(O)O	train
N=C1CC[C@@H](C(=O)NNC(=O)[C@@H]2CCN(OS(=O)(=O)O)C2)N(C=O)C1	train
O=c1cc(-c2cccc(O)c2)oc2ccccc12	train
O=C(O)COc1cc(Cl)ccc1C(=O)NCc1c(Br)cc(Br)cc1Br	train
O=P(O)(O)Cc1ccc(-c2ccccc2)cn1	train
O=C(N[C@H]1COC(=O)[C@@H](NC(=O)c2cccc(O)c2O)COC(=O)[C@@H](NC(=O)c2cccc(O)c2O)COC1=O)c1cccc(O)c1O	train
COc1ccc(OC)c(CCC(=O)Nc2cc(-c3nc(SC)[nH]c3-c3ccc(F)cc3)ccn2)c1	train
COc1cn(-c2ccc(N3CCOC3=O)cc2F)nc(-c2ccnn2-c2ccccc2)c1=O	train
NC(=O)c1cccc(-c2cc(Nc3ccc(OC(F)(F)F)cc3)ncn2)c1	train
NS(=O)(=O)c1ccc(C(=O)N2CCN[C@H](Cc3ccccc3)C2)cc1	train
O=c1[nH]c(-c2ccc(N3CCOCC3)cc2)nc2ccccc12	train
N=C(N)c1ccc(CNC(=O)[C@@H]2CCCN2C(=O)[C@@H](CCCN=C(N)N)NS(=O)(=O)Cc2ccccc2)cc1	train
CC1CCC(Cn2c(N3CCO[C@@H]4CCC[C@H]43)nc3cc(-c4noc(=O)[nH]4)nc(-c4cncc(Cl)c4)c32)CC1	train
COc1ccc(S(=O)(=O)N2CCc3ccccc3CC2)cc1NC(=O)Cc1n[nH]c(=O)c2ccccc12	train
CNc1nc2c(CCNCC3CCCC3)c3nc[nH]c(=O)c3cc2[nH]1	train
N[C@@H](CC(=O)N1C[C@H](CO)[C@@H](c2ccc(Cl)c(NC(=O)Cc3ccc(F)cc3)c2)C1)Cc1ccc(Cl)cc1	train
O=C(CC1CC1)N[C@@H](C(=O)NO)c1ccc(-c2cc(F)c(F)c(F)c2)cc1	train
CC1(C)N=C(N)N=C(N)N1OCCCOc1ccc(Br)cc1	train
O=C1OCC/C=C/CC/C=C/C(=N/OCC(=O)N2CCCCC2)Cc2cc(O)cc(O)c21	train
C/C(=C\COc1ccccc1CN(C)C(=O)c1ccc(-c2ccco2)cc1)CCC(=O)O	train
COc1ccc(-c2c(S(C)(O)O)ccc(C(=O)c3c[nH]n(C(C)(C)C)c3=O)c2C)cc1	train
CC(C)(C)C(=O)Nc1nnc(S(N)(=O)=O)s1	train
CN(C)c1cc[n+](Cc2ccc(-c3ccccc3)cc2)cc1	train
CC#CC[Se]c1ccc(S(N)(=O)=O)cc1	train
COc1ccc(-c2ccc(S(=O)(=O)c3ccccc3CC(=O)NO)cc2)cc1	train
COc1cc(O)c2c(c1C(=O)NCc1cccc3ccccc13)OC1=CC(O)=C(C(C)=O)C(=O)[C@]12C	train
CCc1nc(N)nc(N)c1OCCCOc1ccc(-c2c(N)nc(N)nc2CC)cc1	train
O=C(Cc1cccs1)N[C@@H](Cc1cccc(C(=O)O)c1)B(O)O	train
NCc1ccc2ccccc2c1-c1ccc(C(=O)NCCN2CCOCC2)cc1	train
N[C@H](CCCP(=O)(O)O)C(=O)O	train
CCOC(=O)c1cc2cc(-c3cc(C(=O)NCc4ccc(C(=O)O)cc4)nn3C)ccc2[nH]1	train
CS(=O)(=O)Nc1ccc(-c2cncc(/C=C3\SC(N)=NC3=O)c2)cc1	train
CC(C)(C)[n+]1[nH]c(-c2ccc(Cl)cc2)c2c(N)ncnc21	train
Nc1ncnc2c1ncn2[C@@H]1O[C@H](COP(=O)(O)O)[C@H]2O[B-]3(OCc4cc(F)ccc43)O[C@H]21	train
OB(O)c1cccc(/C=C/c2ccc(B(O)O)cc2Cl)c1	train
Cc1ncc(COP(=O)(O)O)c(CN=C(/C=C/OCCN)C(=O)O)c1O	train
Cc1c(C#Cc2cnc3cnc(-c4ccc(N)cc4)cn23)cccc1C(=O)Nc1cc(C(C)C)cc(N2CCN(C)CC2)c1	train
O=C1N=C(c2ccccc2)CC=C1O	train
O=P(O)(O)C(O)(c1cccc(-c2cccc(-c3ccccc3)c2)c1)P(=O)(O)O	train
C[C@H](Nc1ncnc2cc(F)c(F)cc12)C(c1ccccc1)c1ccccc1	train
COC(=O)C[C@@H]1N=C(c2cccc3[nH]ccc23)c2cc(OC)ccc2-n2c(C)nnc21	train
Cc1ccc([C@H](C)Nc2ccc3c(c2)N(C2CC2)[C@H](C)C(=O)N3C)cc1	train
O=Cc1cc(=O)oc2cc(OCc3cccc(Cl)c3)ccc12	train
NCC1CCN(CC(=O)Nc2cccc3c2C(=O)c2c-3n[nH]c2C2CCCCC2)CC1	train
NC(N)=NS(=O)(=O)c1ccc(N=Cc2c(O)[nH]c3ccccc23)cc1	train
O=C(O)COc1cc(Cl)ccc1C(=O)NCc1ccc(Br)cc1	train
CC(C)[C@H]1Cc2[nH]c(=O)c(C#N)cc2CO1	train
O=CNCc1ccccc1	train
C[C@@]1(c2cc(NC(=O)c3ccc(C#N)cn3)ccc2F)Cn2cccc2C(N)=N1	train
CN1C(=O)C[C@@](C)(c2cc(-c3cccc(C#N)c3)cs2)N=C1N	train
NS(=O)(=O)c1nnc(NC(=O)Cc2cccs2)s1	train
Cc1cc(N)nc(CCc2cc(F)cc(CC[C@@H]3C[C@H](F)CN3)c2)c1	train
CC(C)CCn1c(=O)c(C2=NS(=O)(=O)c3ccccc3N2)c(O)c2ccccc21	train
Cc1cc(CN2C(=O)C(C3=NS(=O)(=O)c4c3ccc3c4CN(S(C)(=O)=O)CC3)=C(O)[C@@H]2C(C)(C)C)ccc1F	train
C[C@H]1CCC[C@H](C[C@H]2Cc3cc(O)cc(O)c3C(=O)N2)C1	train
COc1ccc2c(C(=O)Nc3ccc(NC(=O)c4nn(C)c5ccccc45)cc3C)cnn2c1	train
CC(=O)N1CCc2c(c(N3CCCc4cc(-c5cnn(C)c5)c(C(F)F)cc43)nn2C2CCOCC2)C1	train
CNS(=O)(=O)c1c(C)cc(C)cc1C	train
COc1cc(CNC(=O)c2ccc(F)c(CNC3=NCCN3)c2)cc(OC)c1	train
CC(C)(C)C[C@@H]1N[C@@H](C(=O)NCC[C@H](O)CO)[C@H](c2cccc(Cl)c2)[C@@]1(C#N)c1ccc(Cl)cc1	train
OC[C@@H]1[C@@H](O)[C@H](O)[C@@H](O)c2nc(CNc3ccccc3)cn21	train
O=C1Nc2ccc(C3CCCCC3)cc2C12CCOCC2	train
CCc1nc([C@H]2CCCO2)c(C(=O)NC2[C@@H]3CC4C[C@H]2CC(O)(C4)C3)s1	train
CC[C@@H](NC(=O)c1cc2[nH]nc(NC(=O)c3ccc(N4CCN(C)CC4)cc3)c2s1)c1ccccc1	train
C[C@H](C(=O)O)c1ccc(-c2ccccc2)cc1	train
CC(C)CCn1c(CN2CCC(C(N)=O)CC2)nc2c1c(=O)n(C)c(=O)n2C	train
O=C1CCCCc2cnn3c(NC4CC4)nc(nc23)Nc2cccc(c2)N1	train
CCNc1cc(C(=O)N[C@@H](Cc2ccccc2)[C@H](O)CNC2CCCCC2)cc(N2CCCC2=O)c1	train
CC(C)Oc1ccc(-c2ccnc(NC(P(=O)(O)O)P(=O)(O)O)c2)cc1	train
Cn1nc2c(=O)n(CC3(O)CCN(C(=O)C[C@H](c4ccccc4)C(F)(F)F)CC3)cnc2c1-c1ccc(CN)cc1	train
Nc1nc(Cl)nc2c1ncn2[C@@H]1O[C@H](COS(N)(=O)=O)[C@@H](O)[C@H]1O	train
CC[C@H](CO)Nc1ccc2ncc(-c3ccc4[nH]ncc4c3)n2n1	train
CSc1nc(N2C[C@H]3C(=O)N(C)C(N)=N[C@@]3(c3ccc(C#N)s3)C2)nc(C)c1F	train
NCCN1CCC[C@H](NC(=O)N2CC[C@@H](NS(=O)(=O)O)[C@H]2C=O)CC1	train
Cc1ccc(S(=O)(=O)NC(=O)Nc2ccc(S(N)(=O)=O)nc2)cc1	train
O=C(O)c1ccccc1S	train
CN[C@@H](C)C(=O)N[C@H](C(=O)N1C[C@H]2CCCN2C[C@H]1C(=O)N[C@@H]1CCOc2ccccc21)C1CCCCC1	train
Nc1ccc(C(=O)c2ccc(-c3ccc(S(N)(=O)=O)cc3)cc2)cc1	train
O=C(NCc1cccnc1)c1cc(-c2csc3c(=O)cc(N4CCNCC4)oc23)cc2c1OCCO2	train
CCCc1nn(C)c2c(=O)[nH]c(-c3cc(S(N)(=O)=O)sc3OCC)nc12	train
COc1ccc(-c2nc3ccccc3n2[C@H](C(=O)NC2CCCCC2)C2CCCCC2)c(OC)c1	train
CN1C(=O)C(Cc2ccccc2OCC(=O)O)SC1Nc1cccc(C(=O)O)c1	train
C=C1[C@H](O)CC(=C/C=C2\CCC[C@]3(C)[C@@H]([C@@H](C)/C=C/C[C@@H](O)C45CC6CC(CC(C6)C4)C5)CC[C@@H]23)C[C@H]1O	train
C[C@H](N)CNc1cnc(C(N)=O)c(-c2cc3ccccc3[nH]2)n1	train
COc1ccc2c(c1)N(CCCNC(=O)c1cccc3c1N[C@H](C)C(=O)N3)CCC2	train
CCCC[C@H](CN(O)C=O)C(=O)N1CCC[C@H]1c1nc2ccccc2o1	train
N#Cc1c[nH]n2c(=O)c(Cc3ccccc3)c(Cl)nc12	train
O=c1[nH]c(-c2ccc(Cl)cc2)cc2c(F)cccc12	train
COC(C)(C)CCn1nc(Nc2c(C)cccc2C)c2cnc(Nc3ccc(N4CCNCC4)cc3)nc21	train
COC1=CC(=O)c2c(c(COc3ccc([N+](=O)[O-])cc3)c(C)n2C)C1=O	train
NS(=O)(=O)c1ccc(NC(=O)c2n[nH]c3ccccc23)cc1	train
CC1(C)S[C@H]([C@@H](C=O)NC(=O)[C@H](C(=O)O)c2ccsc2)N[C@H]1C(=O)O	train
Cc1ccc(CNC(=O)Nc2cc(S(N)(=O)=O)ccc2O)cc1	train
CC(=O)N[C@@H](Cc1cccc(C(=O)O)c1)B(O)O	train
C=C1[C@@H](O)[C@@H]2O[C@]3(CC[C@H](/C=C/[C@@H](C)[C@@H]4CC(C)=C[C@@]5(O[C@H](C[C@@](C)(O)C(=O)O)CC[C@H]5O)O4)O3)CC[C@H]2O[C@@H]1[C@@H](O)C[C@H](C)[C@H]1O[C@@]2(CCCCO2)CC[C@H]1C	train
CC1(C)Cc2cc(Cl)ccc2C(=N[C@@H](Cc2ccccc2)c2ncc(C#N)c(=O)[nH]2)N1	train
COc1ccc(Cc2nc(C(=O)O)c(O)c(=O)[nH]2)cc1Br	train
OC[C@H]1O[C@@H](n2cnc3c(Br)c(Br)c(Br)c(Br)c32)C[C@@H]1O	train
O=C1CCCCN1	train
CC1(C)S[C@H]([C@H](NC(=O)Cc2ccccc2)C(=O)NCc2ccccc2)N[C@H]1C(=O)N[C@H](Cc1ccccc1)[C@H](O)CC(=O)NCc1nc2ccccc2[nH]1	train
NS(=O)(=O)c1ccc(C(=O)N2CCC(O)(c3ccccc3)CC2)cc1	train
C=CCNC(=O)Nc1nc2cc(-c3cccnc3)c(OCCN3CCOCC3)nc2s1	train
O=C1c2cccc3c(NCCO)ccc(c23)C(=O)N1c1cccc(Br)c1	train
CC1=Nc2ccc(Cl)cc2[C@H](c2ccc(C)cc2)N1CCCN(C)C	train
C[C@@H](O)[C@H](NC(=O)N1CCC(c2ccc(C#Cc3ccccc3)cc2)CC1)C(=O)NO	train
Cc1ccc(NC(=O)CN(Cc2ccc(C(=O)NO)cc2)C(=O)c2ccc(N(C)C)cc2)cc1	train
Nc1nc(Nc2ccc(S(N)(=O)=O)cc2)sc1C(=O)c1ccc(S(N)(=O)=O)cc1	train
O=C(O)c1cccc(Oc2ccccc2)c1	train
COC(=O)N[C@H](C(=O)NN(CCC[C@@](O)(Cc1ccccc1)C(=O)N[C@H]1c2ccccc2C[C@H]1O)Cc1ccc(Br)cc1)C(C)(C)C	train
N#CC1(c2cccc(C(=O)Nc3cc(Oc4ccc5nc(NC(=O)C6CC6)sc5n4)ccc3F)c2Cl)CC1	train
CC(=C/C=C/C(C)=C/C(=O)O)/C=C1\CCCc2c(C)cccc21	train
CC(C)[C@H](NC(=O)[C@H](C)NC(=O)OCc1ccccc1)C(=O)N[C@@H](Cc1ccccc1)[C@@H](O)[C@H](O)[C@H](Cc1ccccc1)NC(=O)[C@@H](NC(=O)[C@H](C)NC(=O)OCc1ccccc1)C(C)C	train
O=C(c1nccs1)N1CCN([C@@H]2CC(=O)N(c3cccc(-c4ccccc4Cl)c3)C2)CC1	train
CCC(=O)N[C@H]1CCN(c2ncc(C(N)=O)c(N)n2)C1	train
Nc1cccc(N)n1	train
O=C(Nc1ccc(-c2ccnc(Nc3ccc(N4CCOCC4)cc3)n2)cc1)[C@H]1CCCN1	train
O=C(Cc1cccs1)N1CCC(c2nc(-c3cccs3)no2)CC1	train
CN1CCN(C(=O)[C@H](CNC(=O)c2ccc(Cl)s2)NS(=O)(=O)c2cc(F)cc(N3CCCCC3=O)c2Cl)CC1	train
Cn1cc(-c2nc(C(=O)N=C(N)N)c(N)nc2N)cn1	train
Cc1nc2c(c(CO)nn2[C@@H](C)c2ccc(C(F)(F)F)cc2)c(=O)[nH]1	train
CCC[C@H]1CN(Cc2ccc(CN3C(=O)[C@@](CCC4CCCCC4)(CC4CCCCC4)N=C3N)cc2)C(=O)N1	train
N[C@@H](Cc1ccc(O)cc1)C(=O)NS(=O)(=O)OC[C@H]1O[C@@H](n2ccc(=O)[nH]c2=O)[C@H](O)[C@@H]1O	train
N=C(N)c1ccc2cc(NC(=O)Nc3ccccc3)ccc2c1	train
CN[C@H]1[C@H]2O[C@@](C[C@H](N)C(=O)O)(C(=O)O)C[C@H]2OC[C@H]1O	train
COc1cc(OC)c2c(=O)[nH]c(-c3cc(C)c(OCCN4CCCC4)c(C)c3)nc2c1	train
CN(C)c1ccc(C(=O)O)c(Oc2nc(Oc3cccc(-c4cccc(CN)c4)c3)c(F)c(N3CC[C@@H](N(C)C)C3)c2F)c1	train
CC(C)(O)C1CCC(NC(=O)c2cnc3nc(C4CC4)ccc3c2)CC1	train
O=c1cc(-c2ccc(Cl)cc2)oc2ccccc12	train
O=C(CCSc1nc2ccccc2c(=O)[nH]1)NC1CCC(c2nnc(-c3ccccc3)o2)CC1	train
Cc1ccccc1OCC(=O)Nc1ccc2cnccc2c1	train
CN(C)c1ccc(O)c(C(=O)c2ccc(C(=O)N[C@@H]3CCCNC[C@H]3NC(=O)c3ccncc3)cc2)c1	train
Cc1cccc(C(=O)Nc2cc(-c3cnc4ccccc4c3)ccc2N2CCN(C)CC2)c1	train
CC(C)c1ccc(CC(=O)N2CCN(c3ccc(C#N)nn3)CC2)cc1	train
O=c1[nH]c(N2CCC3(CC2)CNc2cccc(Cl)c23)nc2c1CCCC2	train
CC(C)C[C@H](NC(=O)OCC1CCC(F)(F)CC1)C(=O)N[C@@H](C[C@@H]1CCNC1=O)C(O)S(=O)(=O)O	train
O=S(=O)(NCB(O)O)c1ccc(-c2nn[nH]n2)cc1C(F)(F)F	train
NS(=O)(=O)c1ccc(NC(=O)Cn2ccc(=O)[nH]c2=O)cc1	train
O=C(O)Cn1ccc(=O)n(Cc2nc3cc(Cl)ccc3s2)c1=O	train
CC(C)(C)n1nc(-c2ccc3ccccc3n2)c(C(N)=O)c1N	train
O=NC(=O)CN(CCO)S(=O)(=O)c1ccc(F)cc1	train
O=C(O)CC[C@H](NP(=O)(O)OCc1ccc(-c2ccccc2)cc1)C(=O)O	train
O=C(NCCO)C1=Cc2c(ncnc2Nc2ccc(Oc3cccc4sccc34)c(Cl)c2)NCC1	train
NCc1ccc(S(=O)(=O)N2CCC(NC(=O)c3cc(C4CC4)on3)CC2)cc1	train
COc1ccc(-c2ccc(S(=O)(=O)N[C@H](C(C)C)P(=O)(O)O)cc2)cc1	train
CN(C)C(=O)c1cccc(Nc2nc(OCC3CCCCC3)c3[nH]cnc3n2)c1	train
Nc1ccnc(N)n1	train
C[C@]1(CO)Cc2cc(NC(=O)c3cnn4cccnc34)c(N3CCOCC3)cc2O1	train
Cc1cc(N2CCC[C@@H]2C(=O)NCCc2ccc3c(c2)OCO3)nc(-n2ccnc2)n1	train
CCC(C#N)(CC)Nc1nc(NC)nc(-n2cncn2)n1	train
CNc1nc2nc3c1[nH]c(=O)n3Cc1cccc(c1)OCCOCCO2	train
Cc1ccc(-n2nc(C(C)(C)C)cc2NC(=O)Nc2cc(COc3cccnc3)[nH]n2)cc1	train
NS(=O)(=O)c1ccc(NC(=O)Cc2cccs2)cc1	train
CN1CCc2nc(C(=O)Nc3ccccc3CNC(=O)c3ccc(Cl)s3)sc2C1	train
NS(=O)(=O)c1ccc(-c2cnc3ccccc3c2)cc1	train
COc1cc2cncnc2cc1OCCc1ccc2ccccc2n1	train
CN(C)[C@H]1CCc2cc(N3CC[C@H](NS(=O)(=O)c4ccc5cc(Cl)ccc5c4)C3=O)ccc21	train
CC(C)C[C@H](NC(=O)[C@H](CCc1ccc(-c2ccc(F)cc2)cc1)C[C@H](CCCCN1Cc2ccccc2C1=O)C(=O)O)C(=O)Nc1ccccc1	train
Nc1nc2c(c(=O)[nH]1)N1C(=O)N(c3ccc(C(=O)N[C@@H](CCC(=O)O)C(=O)O)cc3)C[C@H]1CN2	train
CC(C)(C)NC(=O)c1cncn1C1CCN(c2ccc(-c3nnc(C(F)(F)F)o3)cn2)CC1	train
COc1cccc(CCC[C@H](CC(=O)N(C)O)CP(=O)(O)O)c1	train
Cc1cccc2ccc(N3CCC(C(=O)N[C@H]4CCC[C@H]4CCc4ccccc4C(=O)O)CC3)nc12	train
O=C(Nc1ccc2[nH]cc(CCc3ccncc3)c2c1)c1cc(F)cc(N2CCOCC2)c1	train
O=C1NC(=O)[C@](CNC(=O)c2cc3cc(Cl)ccc3o2)(c2nccs2)N1	train
COc1cc(F)cc([C@@H](CO)NC(=O)[C@@H](C)N2Cc3ccc(-c4nc(Nc5cnn(C)n5)ncc4Cl)cc3C2=O)c1	train
CCCCCCCO[C@H]1O[C@H](CO)[C@@H](O)[C@H](O)[C@@H]1O	train
Cc1ncn(CC(=O)NC(C)(C)C)c1CNC(=O)Cn1c(C)ccc(NS(=O)(=O)Cc2ccccc2)c1=O	train
Cc1c(NC(=O)c2ccc(C(C)(C)C)cc2)cccc1-c1cn(C)c(=O)c(Nc2ccc(C(=O)N3CCOCC3)cc2)n1	train
CC(=O)N[C@H]1[C@H](OCCCn2cc(CN([C@@H](C(=O)O)C(C)C)S(=O)(=O)c3ccc(-c4ccccc4)cc3)nn2)O[C@H](COC(C)=O)[C@@H](OC(C)=O)[C@@H]1OC(C)=O	train
Nc1cccc(-c2cccc(-c3c(N)n[nH]c3-c3ccc(O)cc3)c2)c1	train
COc1cc(NC(=O)C[C@@]2(C)C[C@H](c3cccc(Cl)c3)[C@@H](c3ccc(Cl)c(F)c3)N([C@H](CS(=O)(=O)C(C)(C)C)C3CC3)C2=O)ccc1C(=O)O	train
COc1ccc(F)c(F)c1C(=O)c1cnc(NC2CCN(S(C)(=O)=O)CC2)nc1N	train
Nc1ncnc2c1ncn2[C@@H]1O[C@H](CN(CC[C@H](N)C(=O)O)CC2CN(CCC(c3ccccc3)c3ccccc3)C2)[C@@H](O)[C@H]1O	train
COc1ccc(Oc2cc3c(cc2NS(=O)(=O)c2ccc(OC)c(OC)c2)n(C)c(=O)n3C)cc1	train
NC[C@H](COCc1cccc(N=C(N)c2cccs2)c1)OCc1cccc(N=C(N)c2cccs2)c1	train
COc1ccc(C2=NN(C3CCCCCC3)C(=O)[C@@H]3CC=CC[C@H]23)cc1OCCCCOc1ccc(-c2nn[nH]n2)cc1	train
COc1cc(N2CCN(C)CC2)ccc1Nc1ncc(Cl)c(Nc2cccc3c2C(=O)N(C)C3)n1	train
Nc1c(Cl)cc(S(N)(=O)=O)cc1Cl	train
COc1cc2c(cc1-c1c(C)noc1C)[nH]c1nc(C)nc(Nc3nn(C)c4ccccc34)c12	train
CCCC(=O)OC[C@H](COP(=O)(O)OC1[C@H](O)[C@H](O)C(OP(=O)(O)O)[C@H](O)[C@H]1O)OC(=O)CCC	train
N#Cc1ccc(-c2cc(=O)c3ccccc3o2)cc1	train
C[C@H](C[C@@H](Cc1ccc(-c2ccccc2)cc1)NC(=O)CCC(=O)O)C(=O)O	train
Fc1cccc(Cl)c1-c1nc(-c2ccc(C#Cc3ccc(C(F)(F)F)cc3)nc2)c(Br)[nH]1	train
Cc1cccc(C)c1OCC(=O)N[C@@H](Cc1cccc(Br)c1)[C@H](O)C[C@H](CC(C)C)S(=O)(=O)c1ccc(F)cc1	train
C/C(=C\c1ccc(C(=O)O)cc1)c1ccc2c(c1)C(C)(C)CCC2(C)C	train
Nc1nc(NC2CC2)cc(-c2cccc(Cl)c2Cl)n1	train
OCc1c(F)c(F)c(F)c(F)c1F	train
O=C(O)COc1cc(Cl)ccc1C(=O)NCc1cccc([N+](=O)[O-])c1	train
CC(=O)N[C@@H](Cc1ccc(OCC(=O)O)c(P(=O)(O)O)c1)C(=O)N[C@H]1CCCCN(Cc2ccc(-c3ccccc3)cc2)C1=O	train
O=C(c1cc(Cl)c(O)cc1O)N1CCC[C@@H]1c1ccc(CN2CCC(F)(F)C2)cc1	train
CO[C@@H]1C[C@H](C(=O)Nc2ccc(-c3ccccc3S(C)(=O)=O)cc2F)N(C(=O)Nc2ccc(Cl)cc2)C1	train
Cc1ccc(Nc2nc(N[C@@H]3CCOC[C@@H]3N)ncc2C(N)=O)cc1	train
CC(C)n1nc(Cc2cccc3ccccc23)c2c(N)ncnc21	train
Cc1nc2ccccc2n1Cc1ccc2c(c1)nc(CNc1ccc(C(=N)N)cc1)n2C	train
Cc1nc(-c2ccnc(N)n2)cn1Cc1c(Cl)cccc1Cl	train
OC[C@H]1O[C@H](Sc2ccc(Cl)c(Cl)c2)[C@H](O)[C@@H](n2cc(-c3cc(F)c(F)c(F)c3)nn2)[C@H]1O	train
CCc1[nH]c2nc(Sc3cnc4ncc(=O)[nH]c4c3)nc(N3CC[C@@H](N)C3)c2c1Cl	train
CC(C)[C@H](NC(=O)OC(C)(C)C)C(=O)Nc1cccc(Cl)c1C=O	train
CS(=O)(=O)c1ccc(-c2ccc3cc(O)ccc3c2Oc2ccc(OCCN3CCCCC3)cc2)cc1	train
COc1ccc(S(=O)(=O)N(CC(=O)NO)CC(C)C)cc1	train
NC(=O)c1ccc(N[C@H]2CCCNC2)c2cc(-c3ccccc3)[nH]c12	train
CN(c1ccccc1Cl)S(=O)(=O)[C@@H]1C[C@@H]2O[C@H]1C(c1ccc(O)cc1)=C2c1ccc(O)cc1	train
CCc1[nH]c2nc(Sc3ccc4c(c3)C(=O)N=C4)nc(N3CC[C@@H](N)C3)c2c1Cl	train
CN(C)CCOc1ccc(-c2cc(C(N)=O)c(NC(N)=O)s2)cc1	train
CN1CCC(N(C)c2nc(N(C)CCC#N)c3sccc3n2)CC1	train
O=c1c2cccnc2n(-c2cccc([N+](=O)[O-])c2)c(=O)n1Cc1ccncc1	train
COc1cc(C(=O)N2C[C@@H](n3cc(C4CC4)nn3)C[C@H]2C(=O)N[C@H]2CCCC[C@@H]2c2ccccc2)ccc1CN	train
O=C(O)[C@@]1(O)C[C@@H](O)[C@H](O)C(OCc2cc3ccccc3s2)=C1Cc1cccs1	train
OCC#Cc1ccc(O[C@H]2O[C@H](CO)[C@@H](O)[C@H](O)[C@@H]2O)cc1	train
O=C[C@@H]1CCCN1C(=O)[C@@H]1CCCN1C(=O)OCc1ccccc1	train
Cc1nn(-c2ccnc(Nc3ccc4c(c3)c(C)c(C)n4C)n2)cc1CN1CC(O)C1	train
CC(C)(C)c1cccc(CN[C@H]2CS(=O)(=O)C[C@@H](Cc3cc(F)c(N)c(C[C@H](O)C(F)(F)F)c3)[C@@H]2O)c1	train
C[C@@]12CCC[C@H]1[C@@H]1CC[C@H]3CC(=O)CC[C@]3(C)[C@H]1CC2	train
CCNc1cc(C(=O)N[C@@H](Cc2ccccc2)[C@H](O)CNCc2cccc(C(F)(F)F)c2)cc(N2CCCCS2(=O)=O)c1	train
COc1cc(-c2cn(C)c(=O)c3cnccc23)c(OC)cc1CN(C)C	train
O=c1[nH]c(=O)c2c([nH]1)n(C[C@@H](O)[C@H](O)[C@H](O)CO)c(=O)n2CCCCC(F)(F)P(=O)(O)O	train
O=C(O)c1c(Cl)c(Cl)c(Cl)c(Cl)c1-c1c2cc(Br)c(=O)c(Br)c-2oc2c(Br)c([O-])c(Br)cc12	train
COc1cc2c[n+](Cc3cc(OC)c(OC)c(OC)c3)ccc2cc1OS(N)(=O)=O	train
COc1ccc(S(=O)(=O)NC[C@@H](O)[C@H](Cc2ccccc2)NCc2cc(Cl)ccc2N2C=NNN2)cc1	train
NS(=O)(=O)c1cc2ccccc2s1	train
NC(=O)c1ccc(N[C@@H]2CC[C@@H](O)C2)nc1	train
CNCCN(C)c1cncc(CCc2cc(C)cc(N)n2)c1	train
CS[C@@H]1[C@@H](N)[C@@H](O)[C@@H](O)[C@H]1O	train
NS(=O)(=O)c1cc(-c2nc3ccccc3s2)cs1	train
O=C(O)c1nc2ccc(C(F)(F)F)cc2nc1NCc1ccc(C(F)(F)F)cc1	train
Oc1cc(CC2CCCCC2)ccc1Oc1ccc(Cl)cc1Cl	train
Cn1cc(-c2cc(NS(C)(=O)=O)ccc2Oc2ccccc2)c2cc[nH]c2c1=O	train
OC[C@@H]1[C@@H](O)[C@@H](O)CN1Cc1cccc2cccnc12	train
CSc1ccccc1[C@H]1CCCN1C(=O)CNC(=O)NCc1ccc2c(c1)[C@H]1C[C@@H](N2)[C@H](O)CO1	train
COC1([C@H](NC(=O)c2ccc(C#CC#CCCO)cc2)C(=O)NO)CS(=O)(=O)C1	train
O=c1cnn([C@@H]2O[C@H](COP(=O)(O)O)[C@@H](O)[C@H]2O)c(=O)[nH]1	train
CC[C@@H]1CO[C@@](C)(CCO)CN1C(=O)c1cc(OC)c2oc(N[C@H](C)c3cccc(Cl)c3)nc2c1	train
C=C(C)COc1ccc([C@H]2C3=C(CC(C)(C)CS3(=O)=O)Nc3c(O)cccc3N2C(=O)c2nc(C)oc2C)c(F)c1	train
Nc1nc(N)c2c(Sc3ccc(N4CCOCC4)cc3)cccc2n1	train
COc1ccc(S(=O)(=O)Nc2cc3c(cc2Oc2cccc(OCc4ccccc4)c2)n(C)c(=O)n3C)cc1OC	train
COCC#Cc1cccc([C@@]2(c3ccc(OC(F)F)cc3)N=C(N)N3CC(F)(F)CN=C32)c1	train
COc1ccc(S(=O)(=O)N(Cc2cccnc2)[C@@H](C(=O)NO)C(C)C)cc1	train
COc1ccccc1S(=O)(=O)Nc1ccc2c3c(cc(N4CCN(C)CC4)nc13)C(=O)N2C	train
O=c1[nH]cnc2[nH]cnc12	train
O=C(c1ccc(OCCN2CCCC2)cc1)c1c(-c2ccc(O)cc2)sc2cc(O)ccc12	train
CC[C@@H]([C@H](C)O)N1C(=O)[C@@](C)(CC(=O)O)C[C@H](c2cccc(Cl)c2)[C@H]1c1ccc(Cl)cc1	train
Cc1cccc(C[C@H](NC(=O)c2cc(C(C)(C)C)nn2C)C(=O)NCC=N)c1	train
Cn1cc(-c2ccc3ncc(Cc4ccc5ncccc5c4)n3n2)cn1	train
CC(=O)OC[C@@H]1O[C@@H](S(=O)(=O)NCCCCCOS(N)(=O)=O)[C@H](OC(C)=O)[C@H](O)[C@@H]1O	train
CC(C)C[C@H](C[C@H](O)[C@H](CC1CCCCC1)NC(=O)[C@H](Cc1cnc[nH]1)NC(=O)[C@H](Cc1ccccc1)NC(=O)OC(C)(C)C)C(=O)N[C@@H](CCCCN)C(=O)N[C@@H](Cc1ccccc1)C(=O)O	train
CCCc1cc(-c2cc(C(=O)N(C)C)cc(C(F)(F)F)c2)nc(C=N)n1	train
O=C(NO)c1ccc(Cl)c(NC(=O)c2cccc3ccsc23)c1	train
NS(=O)(=O)c1ccc(Nc2cc(OC3CCCCC3)nc3ncnn23)cc1	train
O=C(O)Cn1ccc(=O)n(Cc2ccc(Cl)c([N+](=O)[O-])c2)c1=O	train
Cn1ccnc1Sc1cc(C(=O)Nc2nccs2)c(N)cc1F	train
Cc1sc2c(c1C)C(c1ccc(Cl)cc1)=N[C@@H](CC(=O)NCCOCCOCCOCCOCCOCCOCCOCCNC(=O)C[C@@H]1N=C(c3ccc(Cl)cc3)c3c(sc(C)c3C)-n3c(C)nnc31)c1nnc(C)n1-2	train
CC(=O)N[C@@H](Cc1ccc(OP(=O)(O)O)cc1)C(=O)N[C@H]1CCCCN(Cc2ccc(-c3ccccc3)cc2)C1=O	train
CCCOc1cc2c(cc1/C(C)=C\C=C\C(C)=C\C(=O)O)C(C)(C)CCC2(C)C	train
OC[C@H]1CNC[C@@H](O)[C@@H]1O[C@@H]1O[C@H](CO)[C@@H](O[C@@H]2O[C@H](CO)[C@@H](O)[C@H](O)[C@H]2O)[C@H](O)[C@H]1O	train
COc1cccc(CC(N)=NC(=O)c2cc(Cl)ccc2OC2CCNCC2)c1	train
Cc1cc(Oc2ccccc2)c(C(C)C)cc1-c1cc(C(=O)O)c2cc(F)ccc2n1	train
CN1CCN(c2cccc(-c3cnn4c3N=CC(c3ccc(O)cc3)C4N)c2)CC1	train
Cc1ccccc1OCC(=O)Nc1ccc2n[nH]nc2c1	train
O=S(=O)(Cc1ccccc1)NCB(O)O	train
CCNC(=O)[C@H]1O[C@@H](n2cnc3c(N)ncnc32)[C@H](O)[C@@H]1O	train
NC(=O)c1ncn([C@@H]2O[C@H](COP(=O)([O-])[O-])[C@@H](O)[C@H]2O)c1O	train
Cc1cc(CS(=O)(=O)c2ccccc2)cc(OCc2ccc(CN3CCC[C@@H]3CO)cc2)c1	train
O=C(O)C1CCN(Cc2ccc(Oc3nc4ccccc4s3)cc2)CC1	train
CCC(=O)c1c(-c2ccccc2)c2cc(Cl)ccc2c(=O)n1Cc1ccc(C(=O)O)cc1	train
COc1ccc2[nH]n(C[C@@]3(C)NC(=O)NC3=O)c(=O)c2c1	train
CCOc1cc2oc(=O)n(CCC(=O)O)c2cc1Cl	train
NS(=O)(=O)c1ccc(N=Nc2c(=O)[nH]c3ccc4[nH][nH]nc4c23)cc1	train
CCC(=O)N1C[C@H](Nc2ncnc3[nH]ccc23)CC[C@@H]1C	train
O=C(NC1CCNCC1)c1[nH]ncc1NC(=O)c1c(F)cccc1F	train
NS(=O)(=O)c1cccc(Nc2nccc(Nc3c(Cl)ccc4c3OCO4)n2)c1	train
COC(=O)Nc1ccc2c(c1)CCCCCCC[C@H](NC(=O)/C=C/c1cc(Cl)ccc1-n1cnnn1)c1nc-2c(Cl)[nH]1	train
O=C(O)c1cccc(S(=O)(=O)N2CCc3ccccc3C2)c1	train
COc1ccc(OCCc2ccccc2)cc1Cc1cnc2nc(N)nc(N)c2c1C	train
O=C(O)CC[C@H](CP(=O)(O)CCC(=O)O)C(=O)O	train
CC(=C/C=C/C(C)=C/C(=O)O)/C=C1\CCCC(C2CC2)=C1CCC(C)C	train
COc1cccc(Nc2c(C(N)=O)cnc3ccc(S(C)(=O)=O)cc23)c1	train
COc1cc2c(cc1OC)CN(S(N)(=O)=O)CC2	train
CC(C)C[C@H](NC(=O)[C@@H](NC(=O)OCc1ccccc1)[C@@H](C)OC(C)(C)C)C(=O)N[C@H](CCC(=O)C1CC1)C[C@@H]1CCNC1=O	train
CC(C)Oc1cccc(/C=C2\SC(=O)NC2=O)c1N1CCC[C@@H](N)C1	train
O=P(O)(O)OC1[C@H](OP(=O)(O)O)[C@@H](OP(=O)(O)O)C(O)[C@H](OP(=O)(O)O)[C@H]1OP(=O)(O)O	train
COc1ccccc1C(=O)Nc1cc2c(cc1N1CCNC[C@H]1C)n(C)c(=O)n2C	train
CN(CCc1ccc(Br)cc1)C1CCN(c2n[nH]c(N)n2)CC1	train
CCc1nc2ccc(OC)cc2nc1O[C@@H]1C[C@@H](C(=O)N[C@]2(C(=O)NS(=O)(=O)C3CC3)C[C@H]2CC)N(C(=O)[C@@H](NC(=O)OC(C)(C)C)C(C)(C)C)C1	train
CCCNC(=O)c1ccc(S(N)(=O)=O)cc1	train
Cc1cc(SCc2sc(-c3ccc(C(F)(F)F)c(F)c3)nc2C)ccc1OCC(=O)O	train
O=c1ccn([C@@H]2O[C@H](COP(=O)(O)OP(=O)(O)O[C@H]3O[C@H](CO)[C@@H](O)[C@H](O)[C@H]3O)[C@@H](O)[C@H]2O)c(=O)[nH]1	train
CC1(C)O[C@@H]2[C@@H](CO[C@@]3(CNc4nc5cc6nc(N)[nH]c(=O)c6cc5[nH]4)OC(C)(C)O[C@@H]23)O1	train
N#Cc1c(NC(=O)c2cc(S(=O)(=O)N3CCOCC3)c(Cl)cc2Cl)sc2c1CCN(Cc1ccc(-c3nn[nH]n3)cc1)C2	train
Cc1cc(N)nc(CCc2cccc([C@@H](CN)Cc3cc(C)cc(N)n3)n2)c1	train
COc1cc([C@H](C)C#Cc2c(C)nc(N)nc2N)ccc1-c1ccccc1	train
CCCN(CCC)C(=O)c1cc(C)cc(C(=O)N[C@@H](Cc2cc(F)cc(F)c2)[C@H](O)[C@H]2C[C@@H](Cc3ccccc3)CCN2)c1	train
NC(=O)c1ccc(NC2CCCC2)nc1	train
CN1CCN(c2ccc(Nc3cc(-c4cccc(-n5ccc6cc(C7CC7)cc(F)c6c5=O)c4CO)cn(C)c3=O)nc2)CC1	train
N[C@H](CC1CCCCC1)C(=O)N1CCC[C@H]1C(=O)NCc1cc(Cl)ccc1CO	train
CN(C)c1cc[n+](Cc2ccc(CCCCc3ccc(Cn4cnc5c(N)ncnc54)cc3)cc2)cc1	train
Cc1nc(NS(=O)(=O)c2cc(Br)cc(Cl)c2O)cn1C1CCCC1	train
CN[C@H](C)Cc1cc(C#N)cc(OCc2ccc3c(C)cc(N)nc3c2)c1	train
C[C@@H]1CCCCN1S(=O)(=O)c1ccc(N2C=CCC2=O)cc1	train
Cc1cc(Cn2c(N3CC4(CNC4)C3)nc3c(-c4c(C)n[nH]c4C)cc(Cl)cc32)cc(C)c1F	train
c1ccc([C@H]2CCCN2c2ccnc3[nH]ccc23)cc1	train
C[C@H]1CC[C@@H](c2nc(-c3ccc(C(=O)Nc4cc(C(F)(F)F)ccn4)cc3F)c3c(N)nccn23)CN1C(=O)C1CC1	train
Nc1[nH]nc2nnc(-c3c(-c4ccccc4)nn4ccccc34)cc12	train
CN(Cc1cnc2nc(N)nc(N)c2n1)c1ccc(C(=O)N[C@H](CCP(=O)(O)C[C@@H](CCC(=O)O)C(=O)O)C(=O)O)cc1	train
O=c1[nH]c(CN2CC[C@H](O)C2)nc2c1oc1ccc(Br)cc12	train
CC(C)Cc1cc(-n2c3c(c4c2CC(C)(C)CC4=O)CCN(C)C3)cc2c1C(=O)NCC2	train
Nc1ncnc2c1nc(Sc1cc3c(cc1I)OCO3)n2C[C@@H]1CCCN(Cc2cccc(S(=O)(=O)F)c2)C1	train
CCCCCCc1cc(=O)c(Oc2ccc(N)cc2C)cn1C	train
CC1(C)CN=C(N2CCN(c3ncnc4sc(C(F)(F)C(F)(F)F)cc34)CC2)S1	train
CCNC(=O)Nc1cn(-c2ccccn2)c2cc(-c3cccnc3)cnc12	train
CCn1c(-c2nonc2N)nc2cnc(Br)cc21	train
CN[C@@H](C)C(=O)N[C@@H]1C(=O)N(Cc2c(OC)ccc3cc(C(=O)O)ccc23)c2ccccc2OC12CCOCC2	train
COc1ccc(/C=C(/C(C)=O)C(=O)Nc2ccc(S(N)(=O)=O)cc2)cc1	train
CCCOc1ccc(-c2csc(-c3ccccc3Cl)c2CC(=O)N=C(N)N)cc1	train
NS(=O)(=O)c1ccc(C(=O)N2CCc3cc(O)c(O)cc3C2)cc1	train
Cc1cc(N=Nc2ccccc2C(=O)O)cc(C)c1O	train
CCOc1ccc(Cl)c2c1[B@-]1(O[C@@H]3[C@H](O1)[C@@H](COP(=O)([O-])[O-])O[C@H]3n1cnc3c(N)ncnc31)O[C@@H]2CN	train
CN1C/C=C/CCCCN2C[C@@]3(CCCc4cc(Cl)ccc43)COc3ccc(cc32)[C@@](O)(C(=O)O)CC1=O	train
CCOC(=O)CO/N=C(/c1ccccn1)C1(c2ccc3c(c2)nc(CNc2ccc(C(=N)N)cc2)n3C)CC1	train
C[C@H](N[C@@H](c1cccc2[nH]c(=O)c(=O)[nH]c12)P(=O)(O)O)c1ccc(Br)cc1	train
CCSCOc1ccc(S(=O)(=O)N2CCCCCC2)cc1NC(C)=O	train
COc1ccc(OCCN2C[C@H]([C@@H](O)CO)[C@H]3CCC[C@@H](C2=O)N3S(=O)(=O)c2cc(Cl)cc(Cl)c2)cc1OC	train
CCCN1CCC[C@@]12CCN([C@@H](C)C(=O)N[C@@H](Cc1ccccc1)[C@H](O)CNCc1cccc(C(C)C)c1)C2=O	train
CN(C)c1ccc(C(=O)NCCCCCCC(=O)NO)cc1	train
N#Cc1cc2c(cn1)[nH]c1ncc(-c3ccc(CN4CCCCC4)cc3)cc12	train
COC(=O)[C@H](C)[C@@H]1N=C(c2ccc(Cl)cc2)c2cc(OC)ccc2-n2c(C)nnc21	train
c1ccc(CN2CCC(n3cnc4cnc5[nH]ccc5c43)CC2)cc1	train
Cc1cc(NC(=O)c2cn(C3(C)CC3)c3ncnc(N)c23)n[nH]1	train
Nc1nc2ccc(SC(F)(F)F)cc2s1	train
CN1C(=O)[C@@](c2ccccc2)(c2cccc(NC(=O)c3ccco3)c2)N=C1N	train
Cc1cc(Cn2c(N3CC4(CNC4)C3)nc3c(N4CCN(C)CC4)cc(Cl)cc32)cc(C)c1F	train
CCCOc1ccc(S(=O)(=O)N2CCN(C)CC2)cc1-c1nc(CC)c(Br)c(=O)[nH]1	train
CCC(=O)Nc1cc(Cl)c(Oc2ccc(O)c(-c3ccc(NC(N)=O)cc3)c2)c(Cl)c1	train
CC[C@@H](C(=O)NCc1ccc(C(=N)N)cc1)N(C)C(=O)[C@@H](Cc1ccccc1)NS(=O)(=O)Cc1ccccc1	train
Nc1cc(CN(CC2CCNCC2)S(=O)(=O)c2ccc(S(=O)(=O)N(Cc3ccc(Cl)cc3)C3CCCC3)cc2)ccc1C(=O)O	train
NCCCN(CCc1ccccc1)CC(=O)N(CCc1ccc(S(N)(=O)=O)cc1)Cc1ccco1	train
N[C@H](CNc1ncc(-c2ccc3c(c2)CC(=O)N3)s1)Cc1ccc(C(F)(F)F)cc1	train
Cc1cn([C@H]2C[C@H](N=[N+]=[N-])[C@@H](COP(=O)([O-])OP(=O)([O-])OP(=O)([O-])OP(=O)([O-])OP(=O)([O-])OC[C@H]3O[C@@H](n4cnc5c(N)ncnc54)[C@H](O)[C@@H]3O)O2)c(=O)[nH]c1=O	train
CC[C@H](C(=O)N1CCCC[C@H]1C(=O)O[C@H](CCc1ccc(OC)c(OC)c1)c1cccc(OCC(=O)O)c1)c1cc(OC)c(OC)c(OC)c1	train
Nc1ccc(-c2n[nH]c([C@@H]3O[C@H](CO)[C@@H](O)[C@H](O)[C@H]3O)n2)cc1	train
O=C(O)c1ccc(-c2nn(C(=O)c3c(Cl)cccc3C(F)(F)F)c3ccccc23)cc1	train
CC(C)[C@H](NC(=O)CCc1ccccc1)P(=O)(O)C[C@@H](CCCCCN)C(=O)O	train
Cn1nc(-c2cccc(-n3ncc4cc(C(C)(C)C)cc(F)c4c3=O)c2CO)cc(Nc2ccc(C(=O)N3CCOCC3)cn2)c1=O	train
CC(C)[C@H](NC(N)=O)C(=O)N[C@@H](CCCN=C(N)N)[C@H](O)c1nccs1	train
NC(=O)n1cc(NC(=O)N2[C@@H]3C[C@@H]3C[C@H]2C(=O)Nc2cccc(OC(F)(F)F)c2)c2ccccc21	train
N#C/C(C(=O)Nc1ccc(-c2ccccc2)cc1)=C(/O)C1CC1	train
COc1cc2c(cc1NS(=O)(=O)c1cc(Br)ccc1OC)OC(C)(C)C(=O)N2	train
CCCCCCCCCCCCC/C=C/[C@@H](O)[C@@H](N)COP(=O)(O)OCC[N+](C)(C)C	train
CN1CCC[C@H]1CCO[C@H](c1cc2nccc(C(=O)O)c2s1)c1ccccc1Cl	train
CC[C@H]1CCc2c(sc3nc(SCC(=O)NCCN4CCCCC4)nc(N)c23)C1	train
NC(=O)CC[C@H](NC[C@@]1(O)OC[C@@H](O)[C@@H](O)[C@@H]1O)C(=O)O	train
O=C[C@H](C[C@@H]1CCNC1=O)NC(=O)[C@H](Cc1cccc(F)c1)NC(=O)c1cc2ccccc2[nH]1	train
C[C@]12C=CC(=O)C=C1CC[C@@H]1[C@@H]2[C@@H](O)C[C@@]2(C)[C@H]1C[C@H]1O[C@@H](C3CCCCC3)O[C@]12C(=O)CO	train
COc1ccc(Cl)cc1-c1nn(C)cc1NC(=O)c1cncc2cn(C)nc12	train
CCCc1cc2c(N3CCN(C4=NCC(C)(C)S4)CC3)ncnc2s1	train
N#Cc1nc(CCCN2CCCCC2)cc(C2CCCCCC2)n1	train
Cc1cnc(Nc2ccc(N3CCN(C)CC3)cc2)nc1Nc1cccc(NS(=O)(=O)C(C)(C)C)c1	train
Cc1ncc([N+](=O)[O-])n1CCOS(N)(=O)=O	train
O=C(NCc1ccccc1)[C@H](OCc1ccccc1)[C@H](O)[C@@H](O)[C@@H](OCc1ccccc1)C(=O)N[C@H]1c2ccccc2C[C@H]1O	train
Cc1cccc(-c2ncn(CC(F)F)c2-c2ccc3nccn3c2)n1	train
CC(C)Cc1sc(N)nc1-c1ccc(P(=O)(O)O)o1	train
CNCc1cc(=O)oc2cc(OCc3cccc(Cl)c3)ccc12	train
CN1Cc2cc(ccc2S(=O)(=O)C2CC2)NC(=O)CCc2cccc(c2)[C@@H](Nc2ccc3c(N)nccc3c2)C1=O	train
CO[C@H](C)C(=O)N[C@@H](Cc1cccc(-c2nccs2)c1)[C@H](O)CN[C@H]1CC2(CCC2)Oc2ncc(CC(C)(C)C)cc21	train
N=[N+]=N[C@H]1C[C@@H](C(=O)N2CCC[C@H]2C(N)=O)N(C(=O)CCCc2ccccc2)C1	train
COc1ccc2c(Oc3ccc(NC(=O)c4c(C)n(CC(C)(C)O)n(-c5ccccc5)c4=O)cc3F)ccnc2c1	train
CO[C@H]1C[C@@H](C)C/C(C)=C/[C@@H](CCOC(=O)NCc2ccccc2)C(=O)C[C@H](O)[C@@H](C)[C@@H](/C(C)=C/[C@@H]2CC[C@@H](O)[C@H](OC)C2)OC(=O)[C@@H]2CCCCN2C(=O)C(=O)[C@]2(O)O[C@H]1[C@@H](OC)C[C@H]2C	train
CC(C)(C)C[C@H]1N[C@@H](C(=O)NCCN2CCOCC2)[C@@H](c2cccc(Cl)c2F)[C@]12C(=O)Nc1cc(Cl)ccc12	train
Cc1cc(N)nc(CCc2cc(F)cc(CC[C@@H]3CCCN3C)c2)c1	train
O=C(Nc1cccc(C(F)(F)F)c1)C1CCN(c2ncnc3nc[nH]c23)CC1	train
O=C(Nc1ccccc1N1CCNCC1)c1csc(-n2ncc3ccccc32)n1	train
NS(=O)(=O)c1nnc(NS(=O)(=O)c2ccccc2)s1	train
O=C(N[C@@H]1CCCNC[C@H]1NC(=O)c1ccncc1)c1ccc(C(=O)c2cc(N3CCCCC3)ccc2O)cc1	train
CC(C)Oc1cc(CN2CC[C@@]3(C[C@@H]2C)CN(C)S(=O)(=O)N3c2cccc(F)c2)ccc1O	train
Nc1cc(C(F)(F)F)c(S(N)(=O)=O)cc1S(N)(=O)=O	train
CC(C)(C)S(=O)(=O)C[C@H](C1CC1)N1C(=O)[C@@](C)(Cc2ncc(CC(=O)O)s2)C[C@H](c2cccc(Cl)c2)[C@H]1c1ccc(Cl)c(F)c1	train
O=C(O)CC[C@@H](CSc1ccc(Cc2ccccc2)cc1)NC(=O)CCCCCCc1ccccc1	train
NC[C@@](O)(c1ccc(Cl)cc1)c1ccc(-c2cn[nH]c2)cc1	train
CC(C)(C)OC(=O)NCc1cn([C@H]2C[C@@H](C(=O)N3CCC[C@H]3[C@H](N)O)N(C(=O)CCCc3ccccc3)C2)nn1	train
O=C(Cn1nnc2ccccc21)N(Cc1ccsc1)c1ccc(-c2cn[nH]c2)cc1	train
NS(=O)(=O)c1ccc(-c2ncc(CCl)[se]2)cc1	train
Cc1cccn2c(=O)c3cc(C(=O)NCc4cccnc4)c(N)[n+](C[C@H]4CCCO4)c3nc12	train
N[C@H](C(=O)Nc1cncc(F)c1CC[C@@H]1CN[C@H](COC(=O)NCC(F)(F)F)CO1)[C@@H](c1ccc(Cl)cc1)c1cc(F)cc(F)c1	train
c1ccc2oc(-c3ncc[nH]3)cc2c1	train
CNc1nccc(-c2cccnc2Oc2ccc(Nc3nc4ccc(C(F)(F)F)cc4[nH]3)c3ccccc23)n1	train
CCN(c1ccc(Cl)cc1)S(=O)(=O)[C@H]1C[C@H]2O[C@@H]1C(c1ccc(O)cc1)=C2c1ccc(O)cc1	train
N=C(N)c1ccc(O[C@@H]2CO[C@H]3[C@@H]2OC[C@@H]3Oc2cccc(C(=N)N)c2)cc1	train
CCCCCC[C@@H](C)NC=O	train
COc1c(O)cc2oc3cc4c(c(O)c3c(=O)c2c1CC=C(C)C)CCC(C)(C)O4	train
O=C1N=Cc2ccc3c(-c4cccc(O)c4)c[nH]c3c21	train
CCOC(=O)c1c(/C(C#N)=C\N)c2ccc(Cl)c(Cl)c2n1C	train
CN1CCN(S(=O)(=O)c2ccc(-c3ccc([C@H]4C[C@@]4(C=N)NC(=O)[C@@H](N)Cc4cccs4)cc3)cc2)CC1	train
O=C(O)CCn1c2ccc(O)cc2c2c3c(c(-c4ccccc4)cc21)C(=O)NC3=O	train
CC1(C)NC(=O)c2ccc(-n3c(=O)[nH]c4ncccc43)cc2N1Cc1ccccc1	train
COc1ccccc1S(=O)(=O)Nc1ccc2c(c1)CN(C)C(=O)N2	train
CC(C)(C)CN(C(=O)CCC(=O)N1CCC[C@@H](C(=O)O)C1)c1ccc(Cl)cc1[C@H](O)c1ccccc1Cl	train
CCCCCCCCCCCCCCCC(=O)NCC(=O)O	train
CCCCCCCCCCCCCCCCCCCCCCCCCC(=O)N[C@@H](CO[C@H]1O[C@H](CO)[C@H](OCc2ccc(Cl)c(Cl)c2)[C@H](O)[C@H]1O)[C@H](O)[C@H](O)CCCCCCCCCCCCCC	train
O=CN1C[C@H](NOS(=O)(=O)O)CC[C@H]1C(=O)NNC(=O)[C@@H]1CCCNC1	train
CC(C)c1cnn2c(NCc3ccccc3)cc(N[C@@H](CO)[C@H](O)CO)nc12	train
Cc1ccc(S(=O)(=O)N(C)CC(=O)N2CCN(c3ccccn3)CC2)cc1	train
CCS(=O)(=O)c1ccc(OC)c(-c2cn(C)c(=O)c3ccc(-c4cnn(C)c4)cc23)c1	train
O=C(Nc1nc2ccccc2s1)c1cccc2c1CN(c1nc(C(=O)O)c(CCCOc3ccc(-n4ncc5cncnc54)cc3)s1)CC2	train
N[C@@H](CSCC[B-](O)(O)O)C(=O)O	train
CNC[C@H](CC1CCCCC1)NC(=O)N1CCC[C@@H]([C@@](O)(CCCCOC)c2cccc(Cl)c2)C1	train
Cc1ccc(-n2nc(C(=O)N3CCN(C)CC3)nc2-c2ccc3c(c2)N(C2CCCC2)[C@H](C)C(=O)N3C)c(C)c1	train
CN1CCCN(c2cncc(-c3cccc(/C=C/C(=O)O)c3)n2)CC1	train
COc1cccc2[nH]c(C(=O)N[C@@H](CC(C)C)C(=O)N[C@@H](C[C@@H]3CCNC3=O)[C@H](O)CO)cc12	train
CCC(=O)Nc1cccc(C(=O)Nc2ccc(Nc3cc(-c4c(-c5ccc(F)cc5)nc(SC)n4C)ccn3)cc2)c1	train
CC(C)[C@H]1CC(=O)c2nnn(-c3cc(F)c(-c4cccc(N(C)C)c4)c(F)c3)c2C1	train
O=C(C1=C(c2ccc(CCCOc3c(F)ccc(F)c3Cl)cc2)C[C@@H]2CNC[C@H]1N2)N(Cc1cccc(Cl)c1Cl)C1CC1	train
O=C(O)C(=O)C=C(O)c1ccccc1F	train
CO[C@@H](C(=O)NC1Cc2ccccc2C1)[C@H](O)[C@@H](O)[C@H](O)/C=C/C(C)(C)C	train
COC(=O)NC1(C(=O)N[C@H]2CCCCC/C=C\[C@@H]3C[C@@]3(C(=O)NS(=O)(=O)C3(C)CC3)NC(=O)[C@@H]3C[C@@H](Oc4nc5c(nc4C)CC=C(OC)C5)CN3C2=O)CCCC1	train
O=C(O)c1ccc(N=Cc2c(-c3c(Cl)cccc3C(F)(F)F)noc2-c2cc[nH]c2)cc1	train
CC[C@H](C)[C@@H]1NC(=O)[C@@H](NC(=O)[C@@H]2Cc3ccc(cc3)OCCCCC(=O)N[C@@H](C(C)C)C(=O)N2)Cc2ccc(cc2)OCCCNC1=O	train
CN(C)C(=O)Cc1ccc(-c2nc(N)nc3ccccc23)cc1	train
Cc1cc2nc([C@@H](CNC(=O)c3c(Cl)cc(-n4cnnc4)cc3Cl)c3ccccc3)[nH]c2cc1C	train
COc1ccc2sc3c(c2c1)NC[C@@H](CN)NC3=O	train
N#C/C(=C\c1ccc(O)c([N+](=O)[O-])c1)C(=O)Nc1nnc(Br)s1	train
Cc1nc(S(=O)(=O)Nc2cc3c(cc2Oc2cccc(OCC(C)C)c2)n(C)c(=O)n3C)cn1C	train
CCN1CC2(C1)CN(c1ccc(Nc3ncc(F)c(-c4cnn5c4[C@H](C)CCCC5)n3)nc1)C2	train
NS(=O)(=O)c1cccs1	train
CC(C)(C)[C@H]1C(O)=C(C2=NS(=O)(=O)c3c(CNS(C)(=O)=O)cccc32)C(=O)N1Cc1ccc(F)cc1	train
O=P(O)(O)OC[C@H]1O[C@](O)(CO)[C@@H](O)[C@@H]1O	train
O=C(O)CC[C@H](NC(=O)N[C@@H](CSCc1ccc(F)cc1)C(=O)O)C(=O)O	train
N[C@@H](Cc1ccc(OCc2ccccc2)cc1)CN(O)C(=O)CCCCC(=O)O	train
C#Cc1ccc(CN2C(=O)c3cc(C(C)(C)O)ccc3[C@]2(OCC2(CO)CC2)c2ccc(Cl)cc2)cc1	train
CCN(C(=O)CO)[C@H]1CN(C(=Nc2cccc(OC(F)F)c2)NC#N)N=C1c1ccc(Cl)c(Cl)c1	train
Cc1cc(=O)[nH]c2cc(-c3ccc(N)cc3Cl)ccc12	train
COc1ccccc1CCOc1cncc2nnc(CC(C)C)n12	train
CC(=O)Nc1c(F)cc(C(=O)NC2CCC(O)CC2)cc1O[C@@H](C)c1ccccc1	train
Cc1cccc(F)c1CN1C[C@H](c2ccc(-c3cnn(CC(N)=O)c3)cc2)[C@@H](N(C)C)C1	train
CCCCCCNc1nc(NC2CCN(C)CC2)c2cc(OC)c(OC)cc2n1	train
NS(=O)(=O)c1ccc(C(=O)N2CCCN(Cc3ccccc3)CC2)cc1	train
O=C(O)c1ccc(CS(=O)(=O)NCB(O)O)cc1	train
COc1cc2ncnc(N3CCC[C@@H](c4ccccc4)C3)c2cc1OCCc1ccccn1	train
OB(O)c1ccc(/C=C/c2ccc(B(O)O)cc2Cl)c(Cl)c1	train
N#Cc1cccc(-c2c[nH]c(=O)c(O)c2)c1	train
Cc1cc(N)nc2cc(-c3ccc(OCc4cocn4)c(CN)c3)ccc12	train
Cc1cc(N)nc2cc(CNCCc3ccc(C#N)cc3)ccc12	train
COc1cc(C)c(S(=O)(=O)N[C@@H](CC(=O)O)C(=O)N[C@H](Cc2ccc(C(=N)N)cc2)C(=O)N2CCCCC2)c(C)c1C	train
NCCCCCCCCCC(=O)N[C@@H](CO)C(=O)N[C@@H](CCCCN)C(=O)NCCC1CCCCC1	train
Nc1ncnc2c1ncn2[C@@H]1O[C@H](COP(=O)(O)O)[C@@H](O)[C@H]1O[C@H]1O[C@H](COP(=O)(O)O)[C@@H](O)[C@H]1O	train
COC(=O)/C(C)=C/CC/C(C)=C/Cc1c(O)c(Cl)c(C)c(C=O)c1O	train
CC(=O)CCCCC/C=C\C(=O)O	train
CC1=C(CCC(=O)O)c2cc3nc(cc4[nH]c(cc4C)cc4[nH]c(cc1n2)cc4C)C(C)=C3CCC(=O)O	train
CCCCCCc1ccc(Oc2ccccc2Br)c(O)c1	train
CC(=O)NCCOc1cc(Br)ccc1C(=O)NCCCC[C@H](NC(=O)N[C@@H](CCC(=O)O)C(=O)O)C(=O)O	train
C[N+](C)(C)CCS	train
Cc1cc(C(=O)O)ccc1NC(=O)[C@H](C1CCCCC1)n1c(-c2ccc(Cl)cc2)nc2cc(F)c(F)cc21	train
CC(C)[C@@H]1NC(=O)CCCC/C=C/C=C/CCOC(=O)[C@@H]2CCCN(N2)C(=O)[C@H](Cc2cccc(O)c2)NC1=O	train
CO[C@@H]1O[C@@H]2CO[C@](C)(C(=O)O)O[C@H]2[C@H](O)[C@@H]1NC(C)=O	train
C[C@H]1CCN(S(=O)(=O)c2cc(NC(=O)CN3C(=O)N[C@](C)(C4CC4)C3=O)ccc2Br)C1	train
Nc1nc(N)c2c(Cl)c(N)ccc2n1	train
CC(=O)N1CCc2[nH]nc(Nc3ccccc3)c2C1	train
CC(C)CN(Cc1ccc(F)cc1)S(=O)(=O)c1ccc(NC2CCN(S(C)(=O)=O)CC2)nc1	train
CC(C)OCc1n[nH]nc1CCS(=O)(=O)c1ccccc1	train
N#CC1(c2ccccc2)CCN(C(=S)S)CC1	train
CN1CCN(c2cnc3cc(C(F)(F)F)cc(-c4cccc(O)c4)c3n2)CC1	train
COc1ccc(N2CCN(c3nc(-c4ccccn4)nc4ccccc34)CC2)cc1	train
O=C(CC[C@@H](Cc1ccc(C(=O)O)cc1)C(=O)O)NO	train
O=C(C[C@H]1CC[C@@H](O)[C@@H]2[C@H](O)[C@H](O)CN12)c1ccccc1	train
Cc1ccccc1Nc1nc2cc(F)c(N(C)C(=O)/C=C\CN(C)C)cc2n2cncc12	train
O=C(c1ccc(OC[C@H]2CCCN2)cc1)c1ccc(-c2ccsc2)cc1	train
COc1cc(-c2ccc(=O)[nH]n2)ccc1OC(F)F	train
Cc1noc(C)c1-c1ccc(=O)n(Cc2ccccc2)c1	train
O=C1NCCc2[nH]c(-c3ccnc(-c4cnc5ccccc5c4)c3)cc21	train
O=C([C@@H](Cc1cccc(C(F)(F)F)c1)NS(=O)(=O)c1cc(F)c2c(c1)CCNC2)N1CCCC1	train
O=C(CC[C@H](NC(=O)c1ccc(C#Cc2ccccc2)cc1)C(=O)NO)NCCCO	train
NC(=O)c1cccc(-c2ccc([C@H](N)Cc3cc(F)ccc3F)cc2)c1	train
Clc1ccc(-c2cnc[nH]2)cc1	train
Cc1cc(N)nc(C[C@@H]2CNC[C@@H]2OCCCCCc2ccccn2)c1	train
CCCCCCCCOc1cccc(COc2ccc(Br)cc2P(=O)(O)O)c1	train
NS(=O)(=O)c1ccc(CNC(=O)c2cn[nH]c2-c2cc(Cl)c(O)cc2O)cc1	train
Nc1nc2ccc(SCc3ccc(C(=O)NCc4ccccc4)cc3)cc2s1	train
COc1cc(Nc2ncnc(-n3c(Nc4ccccc4)nc4ccccc43)n2)cc(OC)c1OC	train
Cc1cc(N)nc(CCc2cc(CCCN(C)C)cc(F)c2F)c1	train
C[C@@H]1c2cc(O)ccc2O[C@@H](c2ccc(OCCN3CCCC3)cc2)[C@H]1c1ccc(O)cc1	train
CCN(CC)c1ccc2cc(C(=O)c3cccs3)c(=O)oc2c1	train
O=C(Nc1nc2ccccc2[nH]1)c1cccc(CN2C(=O)N(Cc3cccc(C(=O)Nc4nc5ccccc5[nH]4)c3)[C@H](Cc3ccccc3)[C@H](O)[C@@H](O)[C@H]2Cc2ccccc2)c1	train
CN(C)c1ccc(-c2cc(=O)c3ccccc3o2)cc1	train
CCN1c2ccc(F)cc2N=C(N2CCN(C)CC2)c2cc(Cl)ccc21	train
CN1C(=O)[C@]2(N=C1N)c1cc(-c3cccnc3F)ccc1O[C@H]1CCCO[C@@H]12	train
CCC(=O)Nc1cccc(Oc2nc(Nc3ccc(N4CCN(C)CC4)cc3)nc3[nH]ccc23)c1	train
O=C(Cc1ccc(O)cc1)Nc1ncc(-c2ccc(O)cc2)nc1Cc1ccccc1	train
O=C(N[C@@H](COc1ccc2[nH]c(=O)[nH]c2c1)c1ccccc1)c1cccn(Cc2ccc(F)c(F)c2)c1=O	train
O=C(COP(=O)(O)O)[C@@H](O)[C@@H](O)[C@H](O)COP(=O)(O)O	train
CCS(=O)(=O)c1ccc([C@@H](NC(C)=O)C(=O)Nc2ccc(C(O)(C(F)(F)F)C(F)(F)F)cc2)cc1	train
CC(C)(C)OC(=O)N[C@H]1CCCCC/C=C\[C@@H]2C[C@@]2(C(=O)NS(=O)(=O)C2CC2)NC(=O)[C@@H]2C[C@@H](OC(=O)n3cc4cccc(F)c4c3)CN2C1=O	train
CCc1cc(O)c(F)cc1-c1ccc2c(-c3nc4c([nH]3)CN(C(=O)c3cnc(N5CCCCC5)cn3)CC4)n[nH]c2c1	train
CN1CCN(C(=O)c2ccc3c(c2)[nH]c2c(C(N)=O)ccc(-c4ccccc4Cl)c23)CC1	train
O=C(Nc1cccc(C(F)(F)F)c1)Nc1ncc(CCNc2ncnc3ccsc23)s1	train
Nc1ccc2ccc(CCNCCc3cccc(Cl)c3)cc2n1	train
C=C1[C@H](O)CC(=C/C=C2\CCC[C@]3(C)[C@@H]([C@H](C)CCCC(O)(Cc4ccccc4)Cc4ccccc4)CC[C@@H]23)C[C@H]1O	train
O=C(O)[C@H](Cc1c[nH]c2ccccc12)NS(=O)(=O)c1ccc(N2CCC(c3ccccc3)CC2)cc1	train
Oc1cc(Oc2cccc(-c3cccc(O)c3F)n2)ccc1F	train
CC(C)[C@H](NC(=O)N(C)Cc1ccccn1)C(=O)N[C@@H](Cc1ccccc1)[C@H](O)[C@H](O)[C@H](Cc1ccccc1)NC(=O)[C@@H](NC(=O)N(C)Cc1ccccn1)C(C)C	train
Cc1cc2cc(NC(=N[C@H]3CCCCN(CC(=O)N4CCCC4)C3=O)NC(=O)c3cccnc3)ccc2o1	train
CCCC[C@H](CC(=O)NO)c1nc(Cc2ccc(C(=O)OC)cc2)no1	train
Cc1nnc2n1-c1ccc(-c3ccc(N)nc3)cc1N(c1ccc(Cl)cc1)C[C@@H]2C	train
CN(Cc1ccccc1)c1nc(Cl)nc2c1ncn2[C@@H]1O[C@H](COP(=O)(O)CP(=O)(O)O)[C@@H](O)[C@H]1O	train
O=C(Cc1cccs1)N[C@@H](Cn1cc(-c2cccc(C(=O)O)c2)nn1)B(O)O	train
COc1cccc(Oc2cccc(N3CCCCC3)c2CN=C(N)NC(=O)c2ccc(C[C@H](N)C(=O)O)cc2)c1	train
c1ccc(-c2cc(-c3ccn[nH]3)on2)cc1	train
N[C@@H](Cc1ccccc1)P(=O)(O)C[C@@H](Cc1ccccc1)C(=O)N[C@@H](Cc1ccccc1)C(=O)O	train
COc1ccc(O)c(-c2n[nH]c(=S)n2NCc2ccccc2C(=O)O)c1	train
O=C(NC(=O)c1ccc2ccccc2c1)N[C@@H]1O[C@H](CO)[C@@H](O)[C@H](O)[C@H]1O	train
CCOc1cc(C2CCN(C)CC2)ccc1Nc1ncc2c(n1)N(Cc1ccccc1)[C@H](CC)C(=O)N2C	train
N=C(N)N1CCC[C@@H](CNC(=O)C[C@H](NS(=O)(=O)c2ccc3ccccc3c2)C(=O)N(CC(=O)O)C2CC2)C1	train
CN1C(=O)[C@@](CCC2CCCCC2)(CC2CCCCC2)N=C1N	train
Cc1cnc(NC(=O)C2CC2)nc1-c1c[nH]c2c(NC(=O)[C@@H](C)N3CCN(C)CC3)cccc12	train
CC1(C)[C@@H]2CC[C@@]1(C)[C@@H](NC(=O)[C@@H](CC1CCCCC1)NC(=O)N[C@@H](CCCCN)C(=O)O)C2	train
NS(=O)(=O)c1ccc(SCCc2ccccc2)cc1	train
Cc1cc(N)nc(C)c1CNC(=O)c1cnn(Cc2ccc(Cn3cccn3)cc2)c1	train
C[C@]1(O)CC[C@H]2[C@@H]3CCC4=CC(=O)CCC4=C3C=C[C@@]21C	train
OC1CN(C2=Nc3ccccc3C(c3ccccc3)=N[C@@H]2c2cccs2)C1	train
O=C(Nc1nccs1)C(=O)NC1CCCC1	train
Cc1nc(N)sc1-c1ccnc(Nc2cccc([N+](=O)[O-])c2)n1	train
CCCC[C@@H](CCS(=O)(=O)c1ccccc1)NC(=O)[C@@H]1CCCC[C@H]1C(=O)c1ccc(Cl)cc1	train
CN(C)C1=N[C@@H]2[C@@H](O)[C@H](O)[C@@H](CO)[C@@H]2O1	train
CN(Cc1ccccc1)C(=S)S	train
CCNC(=O)Nc1cc2c(-c3ccnc(C)c3)ccc(C)c2cn1	train
Cc1nc2ccccn2c1-c1ccnc(Nc2ccc(OC[C@@H](O)CN(C)C)cc2)n1	train
CCc1cc(-c2n[nH]c(C(=O)O)c2-c2ccc3c(c2)OCO3)c(O)cc1O	train
N#Cc1ccc(-c2ccc(C[C@@H](CN)NC(=O)[C@@H]3C[C@H](O)CN3)cc2)cc1	train
COc1cc(C(=O)N2CC[C@@H](O)[C@H](C)C2)cc2nc(NCc3cccc(Cl)c3)oc12	train
NC(=O)c1cn([C@@H](CO)CCc2cccc3ccccc23)cn1	train
O=C1OCCN1c1ccc(-c2nc3ccccc3c(=O)[nH]2)cc1	train
CC(C)c1cc(-c2ccc3c(c2)[C@H](N)CO3)cc([C@H](O)Cn2ccc3cccc(C(=O)O)c32)c1	train
CC(=O)O[C@@H]1[C@H](O)[C@@H](O)[C@@H](CO)O[C@@H]1S(=O)(=O)N1CCC(OS(N)(=O)=O)CC1	train
C[C@H](N=Cc1ccc(OCc2cccc(F)c2)cc1)C(N)=O	train
C[C@@H](Oc1cc(-c2cccc(S(C)(=O)=O)c2)cnc1N)c1cc(F)ccc1N1NC=CN1	train
CC(C)CCC[C@@H](C)[C@H]1CC[C@H]2[C@@H]3CCC4=CC(=O)CC[C@]4(C)[C@H]3CC[C@]12C	train
CNC(=O)NC(N)=NCCC[C@H](NC(=O)CN=[N+]=[N-])C(=O)N(Cc1ccccc1)Cc1ccccc1	train
CCc1cc(-c2[nH]ncc2-c2cnc[nH]2)c(O)cc1O	train
Cn1cc(-c2cc3c(cc2C(F)F)N(c2ccc4sc(=O)n(C)c4c2)CCC3)cn1	train
OC[C@@H]1[C@@H](O)[C@H](O)[C@@H](O)c2nnnn21	train
CCn1cc2c3c(cc(C(=O)N[C@@H](Cc4ccccc4)C(O)(O)CNC4CCOCC4)cc31)N(C)S(=O)(=O)CC2	train
CN(C)c1cc(F)c2c(=O)n(-c3cccc(-c4cc(Nc5ccc(C(=O)N6CCOCC6)cn5)c(=O)n(C)c4)c3CO)ccc2c1	train
CN1CCN(Cc2ccc(-c3ccc(CO[C@H]4CCC[C@@H]4NC(=O)c4cc(-c5cnn(C)c5)cnc4N)cc3)cc2)CC1	train
OC[C@@H]1[C@@H](O)[C@H](O)[C@@H](O)c2[nH]cc[n+]21	train
Nc1nc(N)c(CCCN(C(=O)CSCC(=O)NCCCCOP(=O)(O)O)c2ccc(C(=O)N[C@@H](CCC(=O)O)C(=O)O)cc2)c(=O)[nH]1	train
CC(=O)Nc1nc(C)c(-c2cc(C)c3c(c2)CN([C@@H](C)C2CC2)C3=O)s1	train
Brc1cnc2c(NCc3cncnc3)cc(-c3ccccc3)cn12	train
CCNC(=O)N1CCC(Nc2ncc(I)c(-c3c[nH]c4ccccc34)n2)CC1	train
Cn1c(=S)c2[nH]c(SCCN3CCCC3)nc2n(C)c1=O	train
CCCC[C@H](NC(=O)OCC1(Cc2ccc(F)cc2)CCC1)C(=O)C(=O)Nc1ccn[nH]1	train
COc1ccc(-c2ccc(S(=O)(=O)c3ccccc3[C@H](CCC(=O)O)C(=O)O)cc2)cc1	train
CO[C@H]1CN(CC(=O)Nc2ccc(-n3ccccc3=O)cc2F)C[C@@H]1NC(=O)c1ccc(Cl)s1	train
N#Cc1ccccc1Oc1ccc(Cn2cc(C3CCCC3)nn2)cc1O	train
O=C(O)CCCNC(=O)c1ccc([C@H]2CC[C@H](c3ccccc3)C[C@@H]2O)cc1	train
CC(C)CCN([C@@H](C(=O)NO)C(C)C)S(=O)(=O)c1ccc2ccccc2c1	train
COc1ccc(-c2nc(-c3cccs3)[nH]c2-c2ccc(OC)cc2)cc1	train
CCOC(=O)CCc1ccc(S(N)(=O)=O)cc1	train
COc1ccc(S(=O)(=O)N(CC(C)C)C[C@@H](O)[C@H](Cc2ccccc2)NC(=O)O[C@H]2[C@H]3CO[C@H]4OC[C@@H]2[C@H]4C3)cc1	train
CC#CCOc1ccc(C(=O)N[C@H](C(=O)NO)C(C)(C)N)cc1	train
Cc1cn(C[C@H](N)C(=O)O)c(=O)n(Cc2ccsc2C(=O)O)c1=O	train
CC(=O)NNC(=O)[C@@H]1CC[C@@H](NOS(=O)(=O)O)CN1C=O	train
Cc1cc(N2CCN(C)[C@@H](C)C2)ncc1-c1ccc(-c2nc3c(CO)cccc3c(=O)[nH]2)cc1	train
CC(C)n1c(CC[C@@H](O)C[C@@H](O)CC(=O)O)c(-c2ccc(F)cc2)c2c1C(=O)N(c1ccccc1)CCC2	train
Cc1cccc(Cl)c1NC(=O)Nc1cc2ccccc2cc1C(=O)N[C@H](C(=O)O)c1ccccc1	train
Cc1cn(-c2cc(F)c(C(N)=O)c(N[C@H]3CCOC3)c2)c2c1C(=O)CC(C)(C)C2	train
CSc1ccc(O[C@]2(C)CCN(CC3CC3)C2)cc1	train
CS(=O)(=O)Nc1cccc(-c2cnc(N)c(C(=O)NCC3CCNCC3)n2)c1	train
COCCN1CCc2c(cc(-c3ccnc(Nc4ccnn4C)n3)n2C)C1=O	train
O=C(Nc1nccs1)c1cccc(CN2C(=O)N(Cc3cccc(C(=O)Nc4nccs4)c3)[C@H](Cc3ccccc3)[C@H](O)[C@@H](O)[C@H]2Cc2ccccc2)c1	train
CC(C)(C)c1cc(C(=O)N2CCNC(=O)CC2)c(NC(=O)Nc2cccc3ccccc23)s1	train
C[C@@H]1OC(=O)C(c2ccc(F)cc2)=C1c1ccc2c(c1)NC(=O)CO2	train
O=C(O)CCCn1c2ccccc2c2ccccc21	train
Nc1ccc(NNc2ccc(S(N)(=O)=O)cc2)cc1	train
CN(C(=O)CN1Cc2ccc(-c3nc(NC4CCOCC4)ncc3Cl)cc2C1=O)C(C)(C)C	train
Cc1csc2cc([C@H](C)Nc3ncnc(N)c3C#N)c(-c3ccccc3)c(=O)n12	train
CCc1nn(-c2c(Cl)cc(Cl)cc2Cl)c2nc(Cc3ccc(O)c(O)c3)[nH]c(=O)c12	train
Clc1ccc(C2(c3ccc(-c4ncnc5nc[nH]c45)cc3)CCNCC2)cc1	train
CCc1cc(NS(=O)(=O)Cc2ccc(C)cc2)cc(C)c1C#N	train
CC(=O)CC(=O)SCCNC(=O)CCNC(=O)[C@H](O)C(C)(C)COP(=O)(O)OP(=O)(O)OC[C@H]1O[C@@H](n2cnc3c(N)ncnc32)[C@H](O)[C@@H]1OP(=O)(O)O	train
CCCOc1cc(Cl)cc(-c2cc(-c3c[nH]c(=O)[nH]c3=O)cn(-c3cccnc3)c2=O)c1	train
CC(=O)c1ccc(-c2ccc(CC[C@H](O)CC(=O)O)cc2)cc1	train
O=C1NC(=O)c2cccc3cccc1c23	train
CNC(=O)c1nc(NS(=O)(=O)c2cc(Br)cc(Cl)c2O)cn1C1CCCC1	train
NS(=O)(=O)c1ccc2nc(-c3cscn3)[nH]c2c1	train
NC(=O)[C@@H]1CC[C@@H](NOS(=O)(=O)O)CN1C=O	train
CC(C)c1ccccc1Nc1nc(SCc2cccs2)n[nH]1	train
CC(=O)N1c2ccc(-c3ccc(NC(=O)CCCCCCC(=O)NO)cc3)cc2[C@H](NC(=O)OC(C)C)C[C@@H]1C	train
CC(C)[C@H](NC(=O)OCc1ccccc1)P(=O)(O)C[C@H](C(=O)O)c1cccc(CN)c1	train
Cc1[nH]cnc1-c1ccnc(Nc2ccc(N3CCOCC3)cc2)c1	train
N#Cc1ccc(-c2cnc3[nH]cc(NC(=O)c4cccnc4)c3c2)cc1	train
C[C@H](NC(=O)[C@H](Cc1ccc(-c2ccccc2)cc1)CP(=O)(O)[C@H](C)N)C(=O)O	train
O=C(O)c1c(-c2ccc[nH]c2=O)c2c3occc3c(F)cc2n1Cc1cc2c(=O)[nH]cnc2cc1F	train
N#Cc1ccc(C(=O)N[C@H]2C[C@@H]2c2ccccc2)cc1	train
NC1=N[C@@H](c2ccc([N+](=O)[O-])cc2)N(c2ccc(Cl)c(Cl)c2)C(N)=N1	train
Nc1nnc(-c2ccc(O)c(Cl)c2)c(-c2ccccc2)n1	train
Cc1nc(C(C)(C)O)sc1-c1cnc(N)c(O[C@H](C)c2cc(F)ccc2-n2nccn2)c1	train
O=C1NCC/C=C/CCC[C@@H](C(=O)NCc2ccccc2)C(=O)Cc2c(Cl)c(O)cc(O)c21	train
Cc1cc(Cn2c(N3CCNCC3)nc3ccc(Cl)cc32)cc(C)c1F	train
COc1ccc(S(=O)(=O)N[C@@H](CC(=O)NCc2ccc(C#N)cc2)C(=O)N2CCC[C@H]2C(=O)NCc2ccc(C(=N)N)cc2)cc1Cl	train
COc1ccc(Nc2nc(-c3cccc(C(=O)Nc4ccc(C(=O)O)cc4)c3)cn3ccnc23)cc1OC	train
NS(=O)(=O)c1ccc(NC(=O)NCCNCc2ccccc2F)cc1	train
O=C(O)COc1cc(Cl)ccc1C(=O)NCc1c(F)c(F)c(Br)c(F)c1F	train
CCNc1cc(C(=O)N[C@@H](Cc2ccccc2)[C@H](O)CN[C@@H](C)C(=O)NC2CCCCC2)cc(N(c2ccccc2)S(C)(=O)=O)c1	train
O=C(O)CCCOc1ccccc1[C@@H](NS(=O)(=O)c1ccc2[nH]c(=O)ccc2c1)C(=O)N(CC(=O)O)Cc1cccs1	train
Cc1ccc(Cl)cc1-c1c(C(N)=O)cc(-c2ccnc(Nc3ccc(N4CCN(C)CC4)cc3)n2)n1C	train
NS(=O)(=O)c1ccc(NC(=O)Nc2cccc([N+](=O)[O-])c2)cc1	train
COc1cc(OC)c(-c2ccc(C#CCO)s2)cc1C(=O)NS(=O)(=O)[C@@H]1CCC[C@@H](OC)C1	train
Cc1cn2c(-c3cn[nH]c3)cnc2c(Nc2ccc(C(=O)N3CCOCC3)cc2F)n1	train
Cc1cc(S(=O)(=O)c2c([N+](=O)[O-])cc(C(F)(F)F)cc2[N+](=O)[O-])c(Cl)cc1Cl	train
NS(=O)(=O)c1ccc(OP(=O)(O)c2ccccc2)cc1	train
CC(C)(c1ccc(O)cc1)c1ccc(O)c(F)c1	train
COc1ccccc1C(=O)Nc1cc2c(cc1N1CCCCC1)n(C)c(=O)n2C	train
Brc1cnn2c(NCc3cccnc3)cc(-c3ccccc3)nc12	train
O=S(=O)(NCCNCCOCc1ccc(Cl)cc1)c1cccc2cnccc12	train
CNCCc1cc(C#N)cc(OCc2ccc3c(C)cc(N)nc3c2)c1	train
O=C(Nc1cccc([C@@H]2CN(c3ncnc4[nH]ccc34)CCN2CCO)c1)Nc1c(F)cccc1N1CCCC1	train
C[C@@H](O)[C@H](NC(=O)c1ccc(C#Cc2ccc(CN3CCOCC3)cc2)cc1)C(=O)NO	train
COc1cc(C[C@H]2COC[C@@H]2Cc2ccc(O)c(OC)c2)ccc1O	train
NC1CCC(Nc2cncc(-c3ccc4oc(C(=O)O)cc4c3)n2)CC1	train
Nc1ccc(-c2nc3ccccc3c(=O)[nH]2)cc1	train
N=C[C@@H]1CCCN1C(=O)CNC12C[C@@H]3C[C@@H](CC(O)(C3)C1)C2	train
CC#Cc1cncc(-c2ccc3c(c2)[C@@]2(COC(N)=N2)c2cc(C4=CCOCC4)ncc2O3)c1	train
Cc1c(CNc2cccc3ncccc23)cnc2nc(N)nc(N)c12	train
NS(=O)(=O)c1ccc(C(=O)NCCN(CC(=O)[O-])CC(=O)[O-])cc1	train
CC(C)(C)n1nc(-c2ccc3ccccc3c2)c2c(N)ncnc21	train
CC(=O)Nc1cc(Oc2ccc3c(c2)CCN3C(=O)Nc2ccc(CN3CCN(C)CC3)c(C(F)(F)F)c2)ncn1	train
CC(=O)N[C@@H](Cc1ccc(C(F)(F)P(=O)(O)O)cc1)C(=O)N[C@@H](CCCNC(=O)c1cccc(I)c1)C(N)=O	train
NCCCCCCCCN	train
COc1cccc(C(=O)NC2C[C@H]3CC[C@@H](C2)N3c2ccc(C(=O)NCc3ccccc3)cn2)c1C	train
C=C1[C@H](O)CC(=C/C=C2\CCC[C@]3(C)[C@@H]([C@H](C)CCC(C)(C)O)CC[C@@H]23)C[C@H]1O	train
Cc1ccc(C(=O)O)cc1	train
COc1ccncc1CCCNCc1ccc2ccc(N)nc2c1	train
Nc1nc2sc3cccc(CNc4ccc(C(=O)N[C@@H](CCC(=O)O)C(=O)O)cc4)c3c2c(=O)[nH]1	train
Nc1ncnc2c1c(Oc1cccc(Cl)c1)nn2CC1CCNCC1	train
Nc1c(C(=O)c2cccc(OC[C@@H](O)CO)c2)cnn1-c1ccc(F)cc1	train
O=S(=O)([C@@H]1C[C@@H]2O[C@H]1C(c1ccc(O)cc1)=C2c1ccc(O)cc1)N(CC(F)(F)F)c1ccccc1	train
COC(=O)NC1(C(=O)N[C@@H](Cc2ccccc2)[C@@H](O)C[C@H](Cc2ccccc2)NC(=O)O[C@H]2CO[C@H]3OCC[C@H]32)CCCC1	train
CC1=C[C@@H](C(N)=O)N2C[C@@H]1N(OS(=O)(=O)O)C2=O	train
CCCCOc1ccc(S(N)(=O)=O)cc1	train
CN1CCN(C(=O)c2ccc(-c3cc(=O)c4ccccc4o3)cc2)CC1	train
O=C(O)c1ccc2nc(-c3c(Cl)cccc3Cl)oc2c1	train
O=C(O)c1cc(-c2ccc(F)cc2F)cc(I)c1O	train
CC(C)CC(=O)Nc1ccc(-c2nc3ccccc3c(=O)[nH]2)cc1	train
Nc1nonc1-c1nc2ccccc2n1CC1CC1	train
C=CC(=O)N1CCC[C@@H](n2nc(-c3ccc(OCc4nccn4C)c(Cl)c3)c3c(N)ncnc32)C1	train
COCCCn1ccc2cc(-c3cc(-c4ccccc4)cc(=O)n3O)cnc21	train
O=C1NC(=O)c2c(NCCCc3cc(O)cc(Cl)c3)cccc21	train
COC(=O)C1CCC(n2c(NC(=O)c3ccccc3)nc3ccc(CN4CCCCC4)cc32)CC1	train
Cc1cnc(Nc2ccc(N3CCN(C)CC3)cc2)nc1Nc1cccc(S(=O)(=O)NC(C)(C)C)c1	train
O=C(Nc1ccc(Cl)cc1)[C@H]1CN(CC(F)(F)F)C[C@@H]1C(=O)Nc1ccc(-n2ccccc2=O)cc1F	train
O=C(O)C(=O)N[C@@H](CSCc1ccc2ccccc2c1)C(=O)O	train
Cn1nc(-c2cccc(NC(=O)c3ccc(C(C)(C)C)cc3)c2CO)cc(Nc2ccc(C(=O)N3CCOCC3)cn2)c1=O	train
CC(C)Nc1cc(-n2c3c(c4c2CC(C)(C)CC4=O)CCN(C)C3)cc2c1C(=O)NCC2	train
CC[C@@H](C)NC(=O)c1cc(N)cc(-c2cnc(NC(C)C)c(=O)n2CC(=O)NCc2ccc(C(=N)N)cc2C(=O)Nc2ccncc2)c1	train
Cc1cc(Nc2nn(C3CCOCC3)c(=O)c3cc(CN4CCN(C)CC4)ccc23)n[nH]1	train
Cc1ccc2cc(C(=O)Nc3cc(NC(=O)c4ccc5c(c4)OCCO5)ccc3C)ccc2n1	train
CN1C(=O)c2ccccc2N(C)c2nc(Nc3ccc(N4CCC(O)CC4)cc3)ncc21	train
N#CNC(=NCc1ccc(S(=O)(=O)c2cccc(OC(F)(F)F)c2)cc1)Nc1ccncc1	train
COc1ccc(Cc2nn3c([C@@H](CCCc4ccccc4)[C@@H](C)O)nc(C)c3c(=O)[nH]2)cc1OC	train
Cc1cc(Nc2nn(C(C)C)c(=O)c3cc(N4CCN(C)CC4)ccc23)n[nH]1	train
Cc1c(Sc2cccc(C(=O)O)c2F)c2ccc(Cl)c(F)c2n1CC(=O)N1CC2(CC2)c2ccccc21	train
COc1ccc(S(=O)(=O)N2Cc3cc(C#N)ccc3N(Cc3cncn3C)C[C@H]2Cc2ccccc2)cc1	train
NS(=O)(=O)O[C@@H]1CCN(S(=O)(=O)[C@@H]2O[C@@H](CO)[C@@H](O)[C@H](O)[C@@H]2O)C1	train
NCC(=O)Nc1ccc2ccc(C(=O)c3ccc(F)c(O)c3)nc2c1	train
CCOC(=O)c1c(C)[nH][n+](-c2ccccc2)c1C	train
CC(C)Oc1cccc(CN2CCC3(CC2)C(=NC2CCCCC2)NC(=O)N3c2cccc(F)c2)c1	train
COc1ccc(C)cc1S(=O)(=O)NCC1(c2ccccc2)CCN(C(=O)NCc2ccc(C)cc2)CC1	train
CCC(=O)N1CC[C@H]2CCN(c3ncnc4[nH]ccc34)[C@H]2C1	train
N#Cc1nnc2ccccc2c1NCCC(c1ccccc1)c1ccccc1	train
C[C@]1(c2cc(/C=C(\F)c3ccc(C#N)cn3)ccc2F)N=C(N)S[C@@]2(C(=O)N3CCOCC3)C[C@H]21	train
C[C@H](C(=O)N[C@H](CO)CC(=O)O)n1c(=O)c(NC(=O)c2ccc(Nc3cnc4ccccc4n3)cc2)cn(C)c1=O	train
Cc1ccc2[nH]c(C(=O)N3CCC(CCO)CC3)cc2c1	train
CC(C)COC(=O)c1ccc2[nH]c(O)c(N=Nc3ccc(S(N)(=O)=O)cc3)c2c1	train
COc1cccc2c(=O)[nH]c(-c3ccc(Cl)cc3)cc12	train
CCO[C@@H]1C[C@H](CCc2cc(F)c(F)c(CCc3cc(C)cc(N)n3)c2)N(C)C1	train
N=C(N)c1ccsc1	train
N=C(N)c1ccc(CNC(=O)[C@@H]2Cc3ccc(cc3)NC(=O)CCN3CCN(CCC(=O)Nc4ccc(cc4)C[C@@H](NS(=O)(=O)NC4CCCCC4)C(=O)N2)CC3)cc1	train
CC(C)c1ccc(-c2cc(=O)c3ccccc3o2)cc1	train
CC(C)CC(=O)c1ccc(OC(F)F)c(O[C@@H]2CCOC2)c1	train
O=C1N=c2cc([N+](=O)[O-])c([N+](=O)[O-])cc2=NC1=O	train
CC(C)CCN1c2nc(Nc3cc(F)c(O)c(F)c3)ncc2N(C)C(=O)C1(C)C	train
CC(C)c1cc(C(=O)N2Cc3ccccc3C2)c(O)cc1O	train
Cc1ccc(NC(=O)c2coc3ccccc3c2=O)cc1C	train
NC(=O)[C@@H]1C[C@@H](NC(=O)[C@@H](N)CCCN=C(N)N[N+](=O)[O-])CN1	train
C[C@H](O)c1ccc(CCOc2ccc(C[C@@H]3SC(=O)NC3=O)cc2)nc1	train
NC(CS)=NCCC[C@H](N)C(=O)O	train
C[N+]1(CCCC(=O)O)CCCC1	train
NS(=O)(=O)c1ccc(-c2nc3ccccc3c(=O)[nH]2)cc1	train
Cc1cc2nc(-c3nccs3)n(-c3cc4nc(N)nc(N)c4cc3Cl)c2cc1C	train
C#CCOc1cnc(C(=O)Nc2cc(F)c(F)c([C@@]3(C)N=C(N)S[C@@]4(COC)C[C@H]43)c2)cn1	train
O=C1NC(=O)c2c1c(-c1ccccc1)cc1[nH]c3ccc(O)cc3c21	train
CC(C)Oc1ccc(-n2c(C(=O)O)cc3cc(-c4ccc(C(C)(C)C)cc4)ccc32)cc1	train
COc1cc(-c2cc(C)nc(N)n2)c(Cl)cc1Cl	train
COc1ccc(-c2nc3ccc(F)cc3c3c(=O)n(CC(=O)O)c(C)nc23)cc1	train
CC(C)CCn1c(CN2CCN(C(=O)c3ccco3)CC2)nc2c1c(=O)n(C)c(=O)n2C	train
O=C(Nc1cc(-c2csc(=O)[nH]2)cc(S(=O)(=O)NC2CCCC2)c1)C1CC1	train
CCNC(=O)Nc1cc(-n2cc(Br)cn2)c(C(=O)Nc2cccnc2)cn1	train
O=C(O)c1ccc(OC[C@H](C2CCCCC2)n2c(-c3ccc(Cl)cc3)nc3cc(F)c(F)cc32)c(F)c1	train
Nc1nc2c(CCCCC(F)(F)P(=O)(O)O)c[nH]c2c(=O)[nH]1	train
N[C@@H](Cn1c2c(c(=O)[nH]c1=O)CSC2)C(=O)O	train
NS(=O)(=O)c1ccc(NC(=O)CN2C(=O)NC3(CCCCC3)C2=O)cc1	train
O=C(O)c1ccc(C(=O)Nc2ccc(O[C@H]3O[C@H](CO)[C@@H](O)[C@H](O)[C@@H]3O)c(Cl)c2)cc1	train
CC(C)NC(=O)[C@H](Cc1c[nH]c2ccccc12)NC(=O)[C@H](CCCCN[C@]1(CCCC(=O)O)O[C@@H]2[C@H](O)[C@@H](COP(=O)(O)OP(=O)(O)OC[C@H]3O[C@@H](n4cnc5c(N)ncnc54)[C@H](O)[C@@H]3O)O[C@@H]2S1)NC(=O)OCc1ccccc1	train
O=C(NCCN1CCOCC1)c1ccc(-c2nccc3ccccc23)cc1	train
O=C(NCc1ccncc1)c1ccc(Oc2ccc(C#C[C@]3(O)CN4CCC3CC4)cc2)cc1	train
COCCN1Cc2ccc(-c3nc(NC4CCOCC4)ncc3Cl)cc2C1=O	train
CC(C)[C@H]1CC(=O)c2nnn(-c3cc(F)c(-c4cc(CO)ccc4F)c(F)c3)c2C1	train
CCc1c(CC(N)=O)c2cc(OCCCP(=O)(O)O)ccc2n1Cc1ccccc1	train
Cc1cc2c(cc1N1C(=O)c3cccc4c(CCCO)ccc(c34)C1=O)n(C)c(=O)n2C	train
O=C(O)C1=C(C(=O)Nc2c(F)c(F)c(-c3cccc(OC(F)(F)F)c3)c(F)c2F)C=CC1	train
C[C@@H]1C[C@H]2O[C@@H]2/C=C\C=C\C(=O)Cc2c(Cl)c(O)cc(O)c2C(=O)O1	train
O=C(O)c1ccc(-c2c[nH]c3ncc(-c4ccccc4)cc23)cc1C1CCCC1	train
C[C@H](CCc1ccc(O)cc1)NC(=O)Cc1c(-c2ccccc2)[nH]c2cc(OCCN3CCCCC3)ccc12	train
COc1nc(-c2cccc3c2O[C@H](CNC(=O)C2CCOCC2)CO3)ccc1Nc1cccc(CN(C)C)c1	train
CC(C)(C)c1cc(Br)c(O)c(CNCCCc2ccccc2)c1	train
CCCCCN(C[C@@H](O)[C@H](Cc1ccccc1)NC(=O)[C@@H](NC(C)=O)C(C)C)S(=O)(=O)c1ccc2ncsc2c1	train
CCN(CC)C(=O)[C@@H]1OC(C(=O)O)=C[C@H](N)[C@H]1NC(C)=O	train
Cc1ccccc1-n1c(Cn2nc(-c3cc(O)cc(F)c3)c3c(N)ncnc32)nc2cccc(C)c2c1=O	train
COc1ccc(F)cc1[C@@H](C)Oc1cc(-c2cnnn2C)cnc1N	train
CC[C@@H](C)Oc1cc2c(cc1OC)CC(=O)N(c1ccc(N(C)Cc3ccncc3)cc1)[C@H]2c1ccc(Cl)cc1	train
CCc1nc(N)nc(N)c1C#CCc1cccc(-c2cncnc2)c1	train
Oc1cc(O)c(-c2noc3ccc(NCCN4CCOCC4)cc23)cc1Cl	train
Cc1cccc2ccc(N3CC[C@H](C(=O)N[C@H]4CCO[C@H](CO)C4)C(C)(C)C3)nc12	train
CS(=O)(=O)Cc1cccc(Nc2nccc(Oc3ccc(NC(=O)C4(C(=O)Nc5ccc(F)cc5)CC4)cc3F)n2)c1	train
Nc1ccc2ccc(CNCCCc3cccnc3)cc2n1	train
CNC(=O)c1ccccc1Nc1nc(Nc2ccc(N3CCOCC3)cc2OC)ncc1Cl	train
COC(=O)/C=C(\C)CC/C=C(\C)CC[C@H]1OC1(C)C	train
O=C1Oc2ccccc2C12CCN(c1nc3c(c(=O)[nH]1)CCCC3)CC2	train
CCOc1cc2ncnc(Nc3cccc(-c4csc(CO)n4)c3)c2cc1OCC	train
COc1ccc(C2(c3cc(-c4sc(C)nc4C)n[nH]3)CC2)cc1	train
O=C(OCc1ccccc1)c1cn2c(=O)n(Cc3ccccc3)c(=O)cc2s1	train
COc1cc(-c2ccccc2)cc([C@@H](C)C#Cc2c(C)nc(N)nc2N)c1	train
COc1cc(OC)nc([C@@H]2CCCC[C@H]2C(=O)NCc2ccc(Cl)c(Cl)c2)n1	train
O=S(=O)(NCB(O)O)c1ccc(-c2nn[nH]n2)cc1Cl	train
O=C(O)Cn1cc(Cc2nc3c(F)c(F)cc(F)c3s2)c2cccnc21	train
NC1=N[C@H]2[C@H](CS[C@H]2CCCCC(=O)NCCCCCC(=O)O)N1	train
O=C(O)CCCCN(Cc1ccc([N+](=O)[O-])cc1)CP(=O)(O)O	train
O=C(CCCCCCc1ccccc1)c1nnc(-c2ccccn2)o1	train
C=CC(=O)N1CCC[C@@H](n2nc(-c3cccc(C(=O)Nc4cccc(C(C)(C)C)c4)c3)c3c(N)ncnc32)C1	train
c1ccc(Cn2c(-c3ccccc3)nc3ccccc32)cc1	train
NS(=O)(=O)c1ccccc1F	train
N=C(N)c1cccc(C(=O)N[C@@H](C(=O)N2CCC(C(=O)c3ccccc3)CC2)c2ccccc2)c1	train
Cc1ccc(/C=C/c2[nH]c3nc(N)nc(N)c3c2C#N)cc1	train
CC(C)(C#N)c1cc(COc2ccccc2CC(=O)O)cc(-c2ccc3c(c2)[C@H](N)CO3)c1	train
Cc1cccc(Cl)c1NC(=O)c1cnc(Nc2cc(N3CCOCC3)cc(N3CCOCC3)c2)s1	train
CNC(=O)CN1CCN(C(=O)CC2CCC(NC(=O)Cc3sc4ccccc4c3C)CC2)[C@@H](Cc2ccccc2)C1=O	train
CN1CCN(Cc2nc3c(oc4ccc(Br)cc43)c(=O)[nH]2)CC1	train
CCCOCCn1c(=O)nc(NCCOC(C)C)c2cnc(-c3ccc(OC)nc3)cc21	train
CN(C)c1nc(=O)n(-c2ccccc2)c2cc(Cl)ccc12	train
CCc1[nH]c2nc(Oc3cncnc3)nc(N3C[C@@H]4C(N)[C@@H]4C3)c2c1Cl	train
Nc1nc2ccc(C(=O)c3c(F)cccc3F)cn2c1C(=O)c1ccccc1	train
COc1cc(C(=O)NC2CCN(C)CC2)ccc1Nc1ncc(C(F)(F)F)c(Oc2cccc3c2C(=O)CC3)n1	train
Cc1cc(C)c2cc1C(=O)NCCCNC(=O)CCSc1cc-2nc(N)n1	train
O=S(=O)(c1ccc(F)cc1)N1CCOc2cccc(Nc3ccccc3F)c2C1	train
CC(C)(C)c1cc(=O)[nH]c(SCC(=O)c2ccc(Cl)c(S(N)(=O)=O)c2)n1	train
O=S(=O)(NCc1n[nH]nc1CNC1CCCCC1)c1cc(Cl)ccc1Cl	train
NC(=Nc1ccc(OC[C@@H]2C[C@@H](Oc3cccc(N=C(N)c4cccs4)c3)CN2)cc1)c1cccs1	train
COC(=O)C1=C(CN2CC(F)(F)C[C@H]2C(=O)O)NC(c2nccs2)=N[C@H]1c1ccc(F)cc1Cl	train
Cc1n[nH]c(C)c1Cc1nnc(-c2sc3ccccc3c2OC2CCNCC2)o1	train
O=S(=O)(NCCNC/C=C/c1ccc(Br)cc1)c1cccc2cnccc12	train
CSC[C@H]1O[C@@H](n2cnc3c2NC=NC[C@H]3O)[C@H](O)[C@@H]1O	train
COc1nnc2ccc(N(C)CCOc3ccc(C4CCN(c5ccc6nnc(OC)n6n5)CC4)cc3)nn12	train
COc1ccc2c(c1)CC(C)(C)c1c(N)ncnc1-2	train
Cc1ccc(NC(=O)c2ccc(CN3CCN(C)CC3)c(C(F)(F)F)c2)cc1OC1CCN(C(=O)c2cccnc2)CC1	train
NC(=O)C[C@H]1C[C@@H](C2=CN[C@@](Cc3ccccc3)(C[C@H](O)[C@H](Cc3ccccc3)NC(=O)O[C@H]3CCOC3)C2=O)c2ccccc21	train
Cc1sc2c(c1C)C(c1ccc(Cl)cc1)=N[C@@H](CC(=O)Nc1ccc(C(=O)Nc3ccccc3N)cc1)c1nnc(C)n1-2	train
C=CCCn1cc(-c2cccc(C(=O)N(C)C)c2)c2cc[nH]c2c1=O	train
C[C@H]1CC[C@@H](O)[C@H]1NC(=O)[C@H](Cc1ccccc1)C[C@H](O)CN1CCN(C(=O)CCc2cccnc2)C[C@H]1C(=O)NC(C)(C)C	train
COC1CCN(c2nccc(Nc3cc4c(ccn4C4CCCC4)cn3)n2)CC1	train
Cc1ccc(C[C@H](N)CNc2nnc(-c3ccc4n[nH]c(C)c4c3)s2)cc1	train
Cc1cccnc1-c1ccc2nc(N)c(C[C@@H](C)C(=O)NCCC(C)(C)C)cc2c1	train
N#Cc1c(N2CCC[C@H](N)C2)n(Cc2ccccc2)c2c(=O)n(Cc3ccnc4ccccc34)cnc12	train
OB(O)c1ccc(/C=C/c2cc(O)cc(O)c2)cc1	train
Cc1cc(N)nc(CCc2cc(N)cc(CCc3cc(C)cc(N)n3)c2)c1	train
Cc1noc(C)c1-c1cc(O)cc([C@H](O)C2CC2)c1	train
CC(C)c1cccc(CNC[C@@H](O)[C@@H]2COC/C=C/C[C@@H](c3ccccc3)NC(=O)c3cc(cc(N(C)S(C)(=O)=O)c3)C(=O)N2)c1	train
O=C(O)CNC(=O)c1n[nH]c2ccccc2c1=O	train
C[C@H](NC(=O)c1ccc(C#N)n1C)c1c(F)cccc1Cl	train
NS(=O)(=O)c1ccc(CC[n+]2c(-c3ccccc3)cc(-c3ccccc3)cc2-c2ccccc2)cc1	train
C[C@@H]1O[C@@H](Oc2c(-c3cc(O)c(O)c(O)c3)oc3cc(O)cc(O)c3c2=O)[C@H](O[C@@H]2O[C@H](COC(=O)/C=C/c3ccc(O)c(O)c3)[C@@H](O)[C@H](O)[C@H]2O)[C@H](O)[C@H]1O	train
Nc1nc2[nH]c(-c3ccc(Br)cc3)c(-c3ccccc3)c2c(=O)[nH]1	train
CNC(=O)[C@H](Cc1ccc(C(F)(F)P(=O)(O)O)c(Br)c1)NS(C)(=O)=O	train
CC(C)c1cccc(CNC[C@@H](O)[C@H](Cc2ccccc2)NC(=O)[C@@H]2CCC[C@H](C(C)(C)N3CCCCC3=O)C2)c1	train
O=C(Nc1ccc(Nc2nccc(Nc3cc(C4CCCC4)[nH]n3)n2)cc1)Nc1cccc(C(F)(F)F)c1	train
COc1ncc(-c2nc3c(n2C(C)C)[C@H](c2ccc(Cl)cc2C)N(c2cc(Cl)ccc2C)C3=O)c(OC)n1	train
COc1cc([C@@H](C)C#Cc2c(C)nc(N)nc2N)c(OC)cc1-c1ccccc1	train
CC(C)CNC(=O)[C@@H](C[C@H](O)[C@@H]1COCc2cccc(c2)[C@@H](c2ccccc2)NC(=O)c2cc(cc(N(C)S(C)(=O)=O)c2)C(=O)N1)C(C)C	train
CC(N)=NCCC[C@H](NC(=O)c1ccccc1)C(N)=O	train
CCc1ccc(S(N)(=O)=O)cc1	train
O=C(N[C@H](CO)c1ccc(F)c(Cl)c1)N1CCc2cnc(NC3CCOCC3)nc2C1	train
O=C(Nc1cccc2[nH]ccc12)c1cc2ccc(Br)cc2s1	train
O=C(O)C1=C[C@H](O)[C@@H](O)[C@H](O)O1	train
N#Cc1ccc(-c2ccc(C[C@@H](CN)NC(=O)[C@@H]3CCCN3)cc2)cc1	train
CN(C)C[C@H](O)COc1ccc(Nc2ncc3[nH]c(=O)c(=O)n(-c4ccc5c(c4)CCC5)c3n2)cc1	train
O=C1C(=O)N(CCc2ccccc2)c2ccc(F)cc21	train
O=C1N(Cc2ccc(-c3nn[nH]n3)cc2)c2ccc(Br)cc2C12CCN(S(=O)(=O)c1cccs1)CC2	train
CN1C(=O)[C@@H]2CN(c3ncc(F)cn3)C[C@]2(c2cc(-c3cccc(C#N)c3)cs2)N=C1N	train
CCC(CC)CN(C[C@@H](O)[C@H](Cc1ccccc1)NC(=O)O[C@H]1CO[C@H]2OCC[C@H]21)S(=O)(=O)c1ccc([C@@H](O)CO)cc1	train
NS(=O)(=O)c1nccs1	train
CCOc1cc2c(cc1OCC)[C@H](c1ccc(Cl)cc1)N(c1ccc(C)cc1OCc1nn[nH]n1)C(=O)C2	train
Cc1cc(/C=C/C#N)cc(C)c1Oc1nc(NC2CCN(Cc3ccc(S(N)(=O)=O)cc3)CC2)nc2ccsc12	train
Cc1nn(-c2ccc(C(N)=O)c(NC3CCC(O)CC3)c2)c2cccc(-c3cnc4ccccc4c3)c12	train
C/C(=N\N=C(\N)NO)c1ccc(NC(=O)Nc2ccc(/C(C)=N/N=C(/N)NO)cc2)cc1	train
N#Cc1ccc2ccc(C(=O)c3ccc(F)c(O)c3)nc2c1	train
NCCONC(=O)[C@@H]1CC[C@@H](NOS(=O)(=O)O)CN1C=O	train
CCCCC[C@H](S)C(=O)N[C@@H](Cc1ccccc1)C(=O)N[C@@H](C)C(=O)O	train
Cc1scnc1COc1cc(Cl)cc(-c2cc(-c3c[nH]c(=O)[nH]c3=O)cn(-c3cccnc3)c2=O)c1	train
CCNC1=N[C@@H]2[C@@H](O)[C@H](O)[C@@H](CO)O[C@@H]2S1	train
CCCN(CCC)C(=O)c1cc(C)cc(C(=O)N[C@@H](Cc2cc(F)cc(F)c2)[C@H](O)[C@H]2C[C@@H](OCC)CCN2)c1	train
N#Cc1c(-c2ccc(C(=O)O)cc2)c2c([nH]c1=O)-c1cccc(-c3cn[nH]c3)c1CC2	train
CCCCCCCCOS(N)(=O)=O	train
CCS(=O)(=O)c1ccc(CC(=O)Nc2cc(-c3cccnc3OCc3ccccc3)cs2)cc1	train
O=C(O)[C@H]1Cc2ccccc2CN1S(=O)(=O)c1ccc(-c2ccccc2)cc1	train
COc1ccc([C@@H]2CNC(=O)C2)cc1OC1CCCC1	train
CC(C)C[C@H](NC(=O)N1CCOCC1)C(=O)N[C@@H](CCc1ccccc1)CCS(=O)(=O)c1ccccc1	train
COc1cc2sc(C(=O)CCC(=O)O)cc2cc1OCCOc1c(OC)cc2sc(C(=O)CCC(=O)O)cc2c1F	train
Cc1cc(C)nc(SCC(=O)Nc2cccc(COc3ccc(NC(=O)c4cnn(C)c4)cc3)c2)n1	train
CNC(=O)CCC(=O)N[C@@H](Cc1ccccc1)[C@H](O)CN(CC1CC1)S(=O)(=O)c1cccc(OC)c1	train
Oc1c(F)c(F)c(-c2c(F)c(F)c(O)c(F)c2F)c(F)c1F	train
COc1cc(-c2cn(C)c(=O)c3cnccc23)cc(OC)c1CN(C)C	train
NS(=O)(=O)c1ccc(C(=O)Cn2cnc3ccccc32)cc1Cl	train
CCCCN1CCC(N(Cc2ccccc2)C(=O)Nc2ccc(Cl)c(Cl)c2)CC1	train
N=C(N)c1ccc(CNC(=O)[C@@H]2CCCN2C(=O)CCC2CCCC2)cc1	train
O=C(NCc1ccc(S(=O)(=O)N2CCCCC2)cc1)c1cc2cnccc2[nH]1	train
COc1cc(C(=O)N[C@@H]2CCc3ccc(-c4cn5c(n4)CCC5)cc32)ccc1C	train
NC(=O)c1cc(NC(=O)c2cc(-c3cccc(N)n3)ccc2Cl)n(-c2ccccc2)n1	train
O=C(NO)c1ccccc1	train
CNc1nc2ccc(-c3c(C)ccc(C(=O)c4c(-c5ccccc5)n(C)n(-c5ccccc5)c4=O)c3N)cc2s1	train
CC(=O)c1cc(-c2ccccc2CO)c2cc(Oc3ccccc3)ccn12	train
OC[C@H]1O[C@@H](OCCCc2cn([C@H]3[C@H](O)[C@@H](O)[C@H](c4cn([C@H]5[C@H](O)[C@@H](O)[C@H](n6cc([C@@H]7O[C@H](CO)[C@@H](n8cc(CCCO[C@@H]9O[C@H](CO)[C@H](O)[C@H](O)[C@H]9O)nn8)[C@H](O)[C@H]7O)nn6)O[C@@H]5CO)nn4)O[C@@H]3CO)nn2)[C@H](O)[C@@H](O)[C@H]1O	train
Nc1nc(N2CCC(N(CCc3ccc(Cl)cc3)Cc3ccccc3)CC2)n[nH]1	train
CC1(C)SCN(C(=O)[C@@H](O)[C@H](Cc2ccccc2)NC(=O)[C@H](CS(C)(=O)=O)NC(=O)COc2cccc3cnccc23)[C@@H]1C(=O)N[C@H]1c2ccccc2C[C@H]1O	train
COCCCN1Cc2cccc(C(N)=O)c2C1=O	train
O=c1[nH]c(=O)n([C@H]2C[C@H]3O[C@](c4ccccc4)(P(=O)(O)O)OC[C@H]3O2)cc1/C=C/CP(=O)(O)O	train
O=C(NC1C2CC3CC1CC(O)(C3)C2)c1cnc(NC2CCOC2)nc1C1CCCC1	train
CN(O)C(=O)C[C@@H](CCCc1ccc(C(F)(F)F)cc1)CP(=O)(O)O	train
Cc1cccc(Nc2cc(Cl)nc(SCC(=O)O)n2)c1C	train
CN(CCCOc1ccc(Cc2ccccc2)cc1)CCC(=O)O	train
COc1ccccc1S(=O)(=O)Nc1ccc2c3c(cccc13)C(=O)N2C	train
CCC(=O)N1C[C@H](COc2nc(Nc3cnn(C)c3)nc3[nH]cc(Cl)c23)[C@@H](OC)C1	train
NC(Cc1o[nH]c(=O)c1Br)C(=O)O	train
Cc1ccc(C(=O)NCCO)cc1-n1cnc(OCc2ccc(F)cc2F)c(Cl)c1=O	train
COc1cc(OC)c2c(=O)cc(-c3cc(C)c(OC[C@H](O)CN4CCN(C)CC4)c(C)c3)oc2c1	train
Cc1cc(N)nc(COc2cncc(CNCCc3cccc(F)c3)c2)c1	train
COc1ccc(CC(=O)Nc2cn(C3CC(NC(C)=O)C3)cn2)cc1	train
Cc1ccc(CO)cc1N(c1ccnc(Nc2cc(N3CCOCC3)cc(S(C)(=O)=O)c2)n1)C(C)C	train
COc1cc2ncnc(N3CCc4cccc(S(=O)(=O)N5CCN(C)CC5)c4C3)c2cc1OC	train
Oc1ccc2c(-c3cc(Br)c(O)cc3O)noc2c1	train
O=C(NNC(=O)C12CC3CC(CC(C3)C1)C2)c1ccncc1	train
COc1cc2c3cc1OCCOc1cc4c(cc1OCc1cn(CCC(=O)O)nn1)Cc1cc5c(OCc6cn(CCC(=O)O)nn6)cc1Cc1cc(c(OCc6cn(CCc7ccc(S(N)(=O)=O)cc7)nn6)cc1C4)OCCOc1cc(c(cc1OC)Cc1cc(c(OC)cc1C3)OCCO5)C2	train
OC[C@H]1ONC[C@@H](O)[C@@H]1O	train
Cc1nc(N)nc2c1/C(=N/O)C[C@@H](c1ccc(F)cc1-c1cccnc1)C2	train
O=Cc1ccc(Oc2ccc(Cl)cc2Cl)c(O)c1	train
Cc1nc2ccc(NC(=O)CCNC(=O)CCCc3ccc(CC(C(=O)O)C(=O)O)cc3)cc2s1	train
COc1ccc(C(=O)O)cc1	train
O=c1cc(N2CCOCC2)nc2n1CC[C@@H](C(F)(F)F)N2C[C@H](O)c1ccccc1	train
N=CCNC(=O)[C@@H]1C[C@@H](S(=O)(=O)c2ccccc2)C[C@H]1C(=O)N1CCOCC1	train
O=C(Nc1cc(Cl)cc(Cl)c1)[C@H]1CC(=O)N(C2CCCCC2)C1	train
Cc1cn([C@H]2CCCN([C@H](CC(C)(C)C)c3ccc(C(=O)O)c(Oc4cccc(Br)c4)c3)C2)c(=O)[nH]c1=O	train
C[C@H]1CCC[C@H](C[C@H]2Cc3cc(O)cc(O)c3C(=O)O2)C1	train
COc1ccc(S(=O)(=O)NCC(=O)NO)cc1	train
c1ccc2c(-c3cnn4cc(-c5ccc(N6CCNCC6)cc5)cnc34)ccnc2c1	train
COc1ccc(Sc2c(C)c3c(N)nc(N)nc3n2C)cc1	train
COc1cc(C(=O)N2C[C@H](C)OC[C@@H]2CCO)cc2nc(N[C@H](CF)c3cccc(Cl)c3)oc12	train
O=C(NO)[C@@H](O)[C@H](O)[C@H](O)COP(=O)(O)O	train
c1ccc(Cn2cc(-c3c[nH]c4ncccc34)nn2)cc1	train
CC(=O)C1=C(C)N(c2cccc(C(F)(F)F)c2)C(=O)N[C@@H]1c1ccc(C#N)nc1	train
CCNC(=O)c1cc2c(-c3cc(S(=O)(=O)CC)ccc3Oc3c(C)cccc3C)cn(C)c(=O)c2[nH]1	train
NC(=O)Nc1sc(-c2ccccc2)cc1C(N)=O	train
O=C(O)[C@H](O)c1ccc2c(c1)N(CC1CCC1)C[C@@]1(CCCc3cc(Cl)ccc31)CO2	train
CC(C)n1cc(C(=O)c2cncc(NC(=O)Cc3ccc(Cl)cc3)c2)c2c(N)ncnc21	train
Cc1cc(CN)cc(C)c1-c1ncn(C)c1-c1ccnc2cc(F)ccc12	train
NS(=O)(=O)c1ccc(NC(=O)NC2CCCC2)cc1	train
COC(=O)N[C@H](C(=O)Nc1ccccc1CC[C@@H]1CN[C@H](COC(=O)NCc2ccccc2)CO1)C(c1ccccc1)c1ccccc1	train
O=C1C=Cc2cc(N3CCN(C(=O)c4cccc(Cl)c4)CC3)ccc21	train
Cc1cccc2c(=O)[nH]c(-c3ccc(Cl)cc3)cc12	train
O=P(O)(O)C(Nc1cncc(-c2ccc(OC3CC3)cc2)c1)P(=O)(O)O	train
COc1ccc(Oc2cccc3nc(N)nc(N)c23)cc1	train
CC(C)c1c(C(=O)N[C@H](CO)c2ccccc2)nc(-c2ccc(F)cc2)n1CC[C@@H](O)C[C@@H](O)CC(=O)O	train
O=c1cc(-c2ccccc2)oc2c1ccc1ccccc12	train
O=C(CCN1CCN(C(=O)OCc2cc(Cl)cc(Cl)c2)CC1)c1ccc2[nH]c(=O)oc2c1	train
O=[S@](CCCCP(=O)(O)O)c1ccccc1O	train
O=c1[nH]c(-c2ccc(Cl)c(S(=O)(=O)NC3CCCC3)c2)cs1	train
O=C(NCc1ccc(Cn2c(C(F)(F)F)nc3ccccc32)s1)[C@H](O)[C@@H](O)C(=O)N1CCC[C@@H]1c1cccc(Cl)c1	train
O=C1Cc2cc(Nc3nc(NCc4cccnc4)ncc3Cl)ccc2N1	train
C=C[C@@H]1C[C@]1(NC(=O)[C@@H]1C[C@@H](Oc2nccc3cc(OC)ccc23)CN1C(=O)[C@@H](NC(=O)OC(C)(C)C)C(C)(C)C)C(=O)NS(=O)(=O)C1CC1	train
CCOC(=O)NCc1ccc(-n2c(-c3cc(C(C)C)c(O)cc3O)n[nH]c2=S)cc1	train
Cc1cc(N)nc(COc2cccc(OCCCN)c2)c1	train
COc1ccc(CNc2nc(N(CCO)CCO)nc3c2ncn3C(C)C)cc1	train
O=c1[nH]oc2cccc(Nc3cc(C(F)(F)F)cc(C(F)(F)F)c3)c12	train
NS(=O)(=O)c1c(F)c(F)c(SCCc2ccc(C(=O)O)cc2)c(F)c1NC1CCCCCCC1	train
Cc1cnc(Nc2ccc(C(=O)NC3CCN(C)CC3)c(F)c2)nc1Nc1ccc(Cl)c(NS(=O)(=O)C(C)(C)C)c1	train
O=C(O)Cc1cccc(OCCCN(Cc2cccc(C(F)(F)F)c2Cl)CC(c2ccccc2)c2ccccc2)c1	train
CC[C@@H](C(=O)OC(C)(C)C)N1C(=O)[C@@H](CC(=O)O)C[C@H](c2cccc(Cl)c2)[C@H]1c1ccc(Cl)cc1	train
CC(C)[C@H]1Cc2cc(F)ccc2S(=O)(=O)N(C[C@@H](O)[C@H](Cc2ccccc2)NC(=O)NC(C)(C)C)C1	train
CCC(CC)Cc1ccn2c1[nH]c(=O)c1c(Cl)cccc12	train
NC(N)=NC(=O)c1nc(-c2cc3ccccc3o2)c(N)nc1N	train
COc1cc([C@@H](CC(=O)O)c2ccc(C)c(CN3C[C@@H](C)Oc4ccccc4S3(=O)=O)c2)cc2nnn(C)c12	train
O=C(CO)N1CCC(c2[nH]nc(-c3ccc(Cl)cc3)c2-c2ccncn2)CC1	train
Cc1ccccc1S(=O)(=O)NC(=O)Nc1ccc(S(N)(=O)=O)nc1	train
CC(=O)N[C@H]1CN[C@H](CO)[C@H](O)[C@@H]1O	train
O=C(O)CC[C@H](NC(=O)NC[C@@H](NC(=O)CCCNC(=O)c1ccc(I)cc1)C(=O)O)C(=O)O	train
[N-]=[N+]=NCCCCCCCCN1[C@@H]2[C@H](C(=O)O)[C@@H](O)[C@H](O)[C@@H](O)[C@@H]21	train
COc1ccccc1-c1c[nH]c2ncc(-c3cncc(C(=O)N(C)C)c3)cc12	train
N#CC1(NC(=O)[C@@H]2Cc3ccc(c(Cl)c3)OC/C=C/COc3ccccc3C(=O)N2)CC1	train
COc1ccc2c(c1)cc(CNC(=O)c1cc3ccccc3o1)n2CC(=O)O	train
CC(C)(C)NC(=O)[C@H](c1c(C(=O)O)[nH]c2cc(Cl)ccc12)N(C=O)Cc1ccc(OCc2ccc(Cl)cc2)cc1	train
O=C(/C=C/N1C[C@H]2C[C@@H]1CN2c1ccccn1)c1ccccc1O	train
Nc1nc2c(CN3C[C@H](CO)[C@@H](O)C3)c[nH]c2c(=O)[nH]1	train
Cc1onc(C(=O)O)c1CC(N)C(=O)O	train
CCOCCN(C[C@@H](O)CN1CCC[C@@]2(CCc3c(ccc4[nH]ncc34)O2)C1)S(=O)(=O)c1c(C)cccc1C	train
NS(=O)(=O)c1ccc(C(=O)CSc2ncccn2)cc1Cl	train
CC(C)([C@H](NC(=O)c1ccc(C#CC#CCCO)cc1)C(=O)NO)S(=O)(=O)CC1COC1	train
Cc1ncc(COP(=O)(O)O)c(/C=N/NC(=O)CNC(=O)c2ccccc2C(F)(F)F)c1O	train
N#Cc1cn([C@@H]2O[C@H](CO)[C@@H](O)[C@H]2O)c2nc[nH]c(=O)c12	train
COc1ccc(-c2ccc(C(=O)N[C@H](CO)C(C)(C)C)cc2C(=O)O)c(C(=O)Nc2ccc3c(N)nccc3c2)n1	train
CC(C)CN(C[C@@H](O)[C@H](Cc1ccccc1)NC(=O)[C@@H]1CN(c2cccc(C(F)(F)F)c2)C(=O)O1)S(=O)(=O)c1ccc2c(c1)OCO2	train
COc1cc([C@@H](CO)NC(=O)[C@@H](C)N2Cc3ccc(-c4nc(NC5CCOCC5)ncc4Cl)cc3C2=O)ccn1	train
Cc1c2c(n3c1CCCN1CCC[C@@H]1CNc1cc-3ccc1C(N)=O)CC(C)(C)CC2=O	train
COC(=O)c1cn(-c2c(F)c(F)c(S(N)(=O)=O)c(F)c2F)nn1	train
Cc1nc(N)sc1-c1ccnc(Nc2ccc(N(C)C)cc2)n1	train
Cc1[nH]n(C)c(=O)c1C(=O)c1ccc2c(c1)C(=O)N(Cc1ccccc1)C2=O	train
O=C(O)COc1cc(Cl)ccc1C(=O)NCc1ccc(Br)cc1F	train
CCOC(=O)Nc1cc(-c2ccc(C)c(NS(C)(=O)=O)c2)nn2c(C)nnc12	train
CC(=O)Nc1ccc(-c2ccnc(Nc3ccc(N4CCOCC4)cc3)n2)cc1	train
NS(=O)(=O)c1ccc(NC(=O)NCCNCc2ccc(Br)cc2O)cc1	train
Cc1nn(CC(F)(F)CO)c(-c2ccc(F)cc2)c1-c1ccc2c(c1)NC(=O)CO2	train
O=C(Cn1cc(CNS(=O)(=O)c2ccc(I)cc2)nn1)N1CCC(c2nc(-c3cccs3)no2)CC1	train
NS(=O)(=O)c1ccc(C(=O)NCc2ccc(F)cc2)cc1	train
COc1cc2nccc(Oc3ccc4c(C(=O)Nc5ccc(Cl)cc5)cccc4c3)c2cc1OC	train
N[C@@H](Cn1cc(I)c(=O)[nH]c1=O)C(=O)O	train
NCCCCCC(=O)NO	train
Oc1ccc2c(c1)CCCC2	train
Nc1nc(Nc2ccc(S(N)(=O)=O)cc2)sc1C(=O)c1cccc([N+](=O)[O-])c1	train
C[C@@H]1CCc2[nH]nc(C(=O)N[C@H]3COc4ccccc4N(C)C3=O)c2C1	train
Fc1ccc(-c2cnc3nnc(C(F)(F)c4ccc5ncccc5c4)n3n2)cc1	train
COc1ccc(S(=O)(=O)N[C@H](CO)C(=O)N=O)cc1	train
CNC(=O)c1cnc(Nc2ccc(F)cn2)cc1Nc1ccccc1C(N)=O	train
O=C(Nc1nc2ccccc2s1)c1cccc2c1CN(c1ccc(-c3cnn(Cc4ccncc4)c3)c(C(=O)O)n1)CC2	train
Cc1cc2c(-c3ccc[nH]c3=O)c(C(=O)NS(=O)(=O)C3CC3)n(Cc3cc(F)ccc3F)c2cc1F	train
COc1ccc(S(=O)(=O)N(CC(C)C)C[C@@H](O)[C@H](Cc2ccccc2)NC(=O)c2cc(C)cc(C(=O)N(C)Cc3nc(C)oc3C)c2)cc1	train
CCN(C)CCN1CCCc2cc(N=C(N)c3cccs3)ccc21	train
COc1ccc(-c2cc(=O)c3ccccc3o2)cc1	train
Cn1cc(-c2cccc(C(F)(F)F)c2)c2sc(C(N)=NC3CCS(=O)(=O)CC3)cc2c1=O	train
COC(=O)Nc1ccc(-c2nc([C@H](Cc3ccccc3)NC(=O)/C=C/c3cc(Cl)ccc3-n3cnnn3)[nH]c2Cl)cc1	train
O=C(O)c1cc2sccc2[nH]1	train
CCC(C)(C)c1nn(CCO)c2c1N=C(c1ccc(-n3ccnc3C)cc1)CNC2=O	train
CCOc1ccc(-c2snnc2-c2cc(CC)c(O)cc2O)cc1	train
CCCN(CCC)C(=O)c1cc(C)cc(C(=O)N[C@@H](Cc2cc(F)cc(F)c2)[C@H](O)[C@@H]2NCN(Cc3ccccc3)C2=O)c1	train
Cc1ccc(N(C)C(=O)c2ccc3c(c2)N(C2CC2)[C@H](C)C(=O)N3C)cc1	train
CC(=O)N[C@@H](Cc1cc(F)cc(F)c1)[C@H](O)[C@H]1CO[C@@H](OCC(C)(C)C)[C@H](C)N1	train
Cc1nc2nc[nH]c2cc1-n1c2ccc(F)cc2c2[nH]ncc21	train
O=C1C(Cc2ccccc2)=C(NCCCCc2ccccc2)C(=O)N1Cc1ccccc1	train
CN(c1ccccc1)S(=O)(=O)[C@@H]1C[C@@H]2O[C@H]1C(c1ccc(O)cc1)=C2c1ccc(O)cc1	train
Cc1sc2nc(N)[nH]c(=O)c2c1Sc1ccc(C(=O)N[C@@H](CCC(=O)O)C(=O)O)cc1	train
NCC[C@H](NC(=O)[C@@H](N)CCCN=C(N)N[N+](=O)[O-])C(N)=O	train
CO[C@@H](C(=O)N[C@H]1CC[C@@H](O)CNC1=O)[C@H](O)[C@@H](O)[C@H](O)/C=C/C(C)(C)C	train
Cc1ccccc1OC[C@H]1CCCN1c1ncnc2nc[nH]c12	train
Clc1cccc(CN2CCNCC2)c1	train
N=c1nnc(=N)c1=NNc1ccc(F)cc1	train
Nc1ncnc2c(CN3C[C@H](CSc4ccc(Cl)cc4)[C@@H](O)C3)c[nH]c12	train
CO[C@@H]1CC/C=C/c2cccc(c2)COC(=O)[C@@H]2CCCN(N2)C(=O)[C@H](Cc2cccc(O)c2)NC(=O)[C@H](C(C)C)NC(=O)[C@@H]1C	train
Cc1cccc2c(=O)[nH]c3c(c12)CO[C@@H](C(C)C)C3	train
Cc1cc(N)nc(C[C@H]2CNC[C@H]2OCCNCc2ccco2)c1	train
CN1CCN(c2nc3c(c(=O)[nH]2)CCCC3)CC1	train
COc1ccc(-c2cc3nc(N)nc(N)c3cc2C)cc1OC	train
Cc1cn(-c2cc(NC(=O)c3ccc(C)c(/C=C/n4cnc5c(NC6CC6)ncnc54)c3)cc(C(F)(F)F)c2)cn1	train
CC(C)(N)[C@H](NC(=O)c1ccc(C#CC#Cc2ccc(N)cc2)cc1)C(=O)NO	train
CCCCN(CCCC)C(=O)c1cc(C)n(-c2ccccc2C(=O)N2Cc3ccccc3C[C@H]2CN)n1	train
NS(=O)(=O)c1ccc(-c2cnc(C(=O)N3CCOCC3)o2)s1	train
CNc1nc2[nH]c(-c3cccc(CNC(=O)COC)n3)cc2c2c1ncn2C	train
Cc1cc(-n2ccnc2)cc2[nH]c(-c3c(NCc4ccccn4)cc[nH]c3=O)nc12	train
C[C@H](NC(=O)c1c[nH]c2ncc(C3CC3)nc12)C(C)(C)C	train
CC(C)(F)CN1[C@@H]2CCC[C@@]1(c1c(F)cc(/C=C/C(=O)O)cc1F)c1[nH]c3ccccc3c1C2	train
COc1ccc(CNC(=O)c2ccccc2CN(C)Cc2ccc3c(c2C(=O)O)OCO3)cc1	train
CC1=CC[C@@H]2C[C@H]1C2(C)C	train
COc1cccc(-c2cccc([C@@]3(c4ccncc4)N=C(N)N4CC(F)(F)CN=C43)c2)c1F	train
C=CC(=O)Nc1ccc2c(Nc3ccn[nH]3)nc(-c3ccccc3)nc2c1	train
Oc1c(Br)c(Br)c(Br)c(Br)c1Br	train
Nc1ccc(C(=O)O)c(S)c1	train
OC[C@H]1NNC[C@@H](O)[C@@H]1O	train
N[C@@H](Cn1c2c(c(=O)[nH]c1=O)CCC2)C(=O)O	train
CC[C@H](C)CN(C[C@@H](O)[C@H](Cc1ccccc1)NC(=O)OC[C@H](C)C(=O)OC)S(=O)(=O)c1ccc(OC)cc1	train
COCCOc1ccc2c(c1)ncn2-c1ccc2cccc(N3CCC(N)CC3)c2n1	train
COc1ccc(-c2cc(C(=O)Nc3cc(-c4c(-c5ccc(F)cc5)noc4C(C)C)ccn3)n3c2CN2C[C@H](O)[C@H](O)[C@H]2C3)cc1	train
CC(C)(C)C[C@@H]1N[C@@H](C(=O)Nc2ccc(C(N)=O)cc2)[C@H](c2cccc(Cl)c2F)[C@]12C(=O)Nc1cc(Cl)ccc12	train
COc1ccc(S(=O)(=O)N(CC(C)C)C[C@@H](O)[C@H](Cc2ccccc2)NC(=O)O[C@@H]2C[C@@H]3NC(=O)O[C@@H]3C2)cc1	train
Cc1c(-c2cccc3ncccc23)ccc2nc[nH]c(=O)c12	train
CN1CCN(c2ccccc2CNc2ccc(C(N)=O)cn2)CC1	train
OC[C@H]1O[C@@H](Oc2ccccc2)[C@H](O)[C@@H](O)[C@H]1O	train
COC(=O)N[C@H](C(=O)N[C@@H](C)CCC[C@@H](C=O)N(CCC(C)C)S(=O)(=O)c1ccc(N)cc1)C(c1ccccc1)c1ccccc1	train
Cc1nnc2c3ccccc3c(-c3ccc(N4CCOCC4)c(NS(=O)(=O)c4ccccc4Cl)c3)nn12	train
NC1(C(=O)NCc2ccc(Cl)cc2)CCN(c2ncnc3[nH]ccc23)CC1	train
C[C@@H](N[C@@H](CCCN=C(N)N)C(=O)O)C(=O)O	train
CCCCC/C=C\C/C=C\C=C\C=C\C[C@@H](O)CCCC(=O)O	train
CS(=O)(=O)c1ccccc1-c1ccc(N2CC[C@H](NS(=O)(=O)CCc3ccc(Cl)s3)C2=O)c(F)c1	train
CCNC(=O)c1cc(-c2c(O)cc(O)cc2Oc2ccc([N+](=O)[O-])cc2)on1	train
Cc1ccc(-c2nc3c(O)cccc3c(=O)[nH]2)cc1	train
O=c1c(C2=NS(=O)(=O)c3ccccc3N2)c(O)c2cc(F)ccc2n1CCC1CC1	train
COC(=O)[C@@]1(Cc2ccc(OCc3cc(C)nc4ccccc34)cc2)C[C@@H]1C(=O)NO	train
N[C@H]1CCCC[C@H]1Nc1cc2nc[nH]c(=O)c2c(Nc2cccc3cc[nH]c23)n1	train
N#C/C=C/c1cccc(-c2nc3cnc4[nH]ccc4c3n2C2CCCCC2)c1	train
OB(O)c1ccc2cc[nH]c2c1	train
CCOc1cccc(-c2ccc(NC(=O)/C(C#N)=C(/C)O)cc2)c1	train
CC(C)C[C@H](NC(=O)N[C@@H](CCC(=O)O)C(=O)O)C(=O)O	train
NCc1cccc(OCc2ccc3ccc(N)nc3c2)c1	train
CCCN(CCC)C(=O)c1cc(C(=O)N[C@@H](Cc2ccccc2)[C@H](O)CNC(C)(C)c2cccc(OC)c2)cc(N2CCCCS2(=O)=O)c1	train
CC1(N)CCN(Cc2ccn3ncnc(Nc4cc(O)cc(Br)c4)c23)CC1	train
CC(=O)N1c2ccccc2N(Cc2ccccc2C(=O)O)C[C@@H]1C1CC1	train
N=C(N)c1ccc(CNC(=O)[C@@H]2CCCN2C(=O)COC2CCCC2)cc1	train
COc1ccc(S(=O)(=O)N(CC(F)(F)F)c2cnc(N(CC(=O)O)S(=O)(=O)c3ccc(OC)cc3)c3ccccc23)cc1	train
CCC(=O)N1CCN(c2nc(=O)n(-c3ccccc3C(C)C)c3cc(-c4c(O)cccc4F)c(Cl)cc23)CC1	train
Nc1ncnc2c1ncn2CC(=O)NCCc1ccc(S(N)(=O)=O)cc1	train
C[C@@H](COc1ccc([C@@H]2Oc3ccc(O)cc3S[C@@H]2c2ccc(O)cc2)cc1)N1CCCC1	train
O=C(NO)c1ccc(Cl)c(NC(=O)c2ccccc2)c1	train
CNc1nc([C@H]2CCCN2C(=O)[C@H](O)[C@@H](O)C(=O)N[C@H](C)c2ccc(-n3cccn3)cc2)c(S(C)(=O)=O)s1	train
CCc1ccc2c(c1)c(-c1ccc[nH]c1=O)c(C(=O)O)n2Cc1cc([N+](=O)[O-])ccc1F	train
COc1ccc(-c2noc(CSc3nnc(C)n3-c3ccc(OC)cc3)n2)cc1	train
CCc1ccc2c(c1)[C@@H](NC[C@@H](O)[C@@H]1Cc3cccc(c3)CCCCn3cc(ccc3=O)C(=O)N1)CC1(CCC1)O2	train
CSCC[C@H](NC(=O)N[C@@H](CCCCNC(=O)c1ccc(I)cc1)C(=O)O)C(=O)O	train
N[C@H]1C[C@@H](N2Cc3nn4cccnc4c3C2)CO[C@@H]1c1cc(F)ccc1F	train
C[C@@H](O)[C@H](N)C(=O)NS(=O)(=O)c1cccc(-c2ccc3c(N)ncnc3c2)c1	train
CC[C@@H](c1cccc(C2CC2)n1)N1C(=O)[C@@](C)(CC(=O)O)C[C@H](c2cccc(Cl)c2)[C@H]1c1ccc(Cl)cc1	train
Oc1ccc(Cc2nnc3ccc(-c4ccccc4)nn23)cc1	train
NC(N)=NCCC[C@H](N)C(=O)[O-]	train
CNc1nc2c(CCO)c3nc(N)[nH]c(=O)c3cc2[nH]1	train
Cc1ccccc1CC(=O)Nc1cc(C)c(S(=O)(=O)NCC(=O)O)c(C)c1	train
N[C@H](COc1cncc(-c2ccc3cnccc3c2)c1)CC1C=Nc2ccccc21	train
Cc1nc(-c2ccccn2)nc(NCCc2ccccc2)c1Cl	train
CNS(=O)(=O)c1ccc(Nc2ncc(C(F)(F)F)c(N[C@@H]3CCC[C@H]3N(C)C)n2)cc1	train
CC(C)CC(=O)c1c(Nc2ccc(Cl)cc2Cl)[nH]c2c(Cl)ccc([N+](=O)[O-])c2c1=O	train
O=C(NO)c1cn(-c2cc(Cl)ccc2Oc2ccc(F)cc2)nn1	train
C[C@@H](O)[C@H](N)C(=O)NS(=O)(=O)c1cccc(-c2ccc3c(N)nc(Cl)nc3c2)c1	train
CN1CCN(c2ccc(-c3cnc4[nH]c5cnc(C(=O)O)cc5c4c3)cc2)CC1	train
Nc1nc2cccc(-c3cccc(Cl)c3Cl)n2n1	train
NS(=O)(=O)c1c(F)c(F)c(S(=O)(=O)CCO)c(N[C@H]2CCc3ccccc32)c1F	train
C[C@@H](O)C[C@H]1OC[C@@H](C2CCCCC2)N(c2cc(C#CC(C)(C)C)sc2C(=O)O)C1=O	train
C[C@H](Nc1cccc(Cl)c1Cl)C(=O)Nc1ccc2oc(-c3ccncc3)nc2c1	train
NS(=O)(=O)c1c(F)c(F)c(S(=O)(=O)CCO)c(N[C@H](c2ccccc2)[C@@H](O)c2ccccc2)c1F	train
C/C=C(\C)CC/C=C(\C)CCC=C(C)C	train
O=C1[C@@H](O)[C@H](O)C[C@](O)(C(=O)O)[C@@H]1Cc1c(F)c(F)c(F)c(F)c1F	train
COCCNC(=O)c1ccc(Nc2ncc3cc(-c4ccncc4)ccc3n2)cc1	train
N#Cc1ccc2c(-c3cc4cc(CN5CCC(CN)CC5)ccc4[nH]3)n[nH]c2c1	train
NS(=O)(=O)c1ccc(C(=O)N2CCCc3ccccc32)cc1	train
Cn1nc(C(=O)Nc2c(F)c(F)c(-c3ccccc3)c(F)c2F)c(=O)[nH]1	train
Nc1ncnc2c1ncn2[C@@H]1O[C@H](COS(=O)(=O)NC(=O)CCCC[C@@H]2SC[C@@H]3NC(=O)N[C@@H]32)[C@@H](O)[C@@H]1F	train
CCN(CC)CCN(CC12CC(c3ccc(C(F)(F)F)cc3)(C1)C2)C(=O)Cn1c(SCc2ccc(F)cc2)nc(=O)c2c1CCC2	train
COc1ccc2c(c1)C(=O)[N+](C[C@@]1(c3ccc(-c4cccnc4)cc3)NC(=O)NC1=O)=C2	train
CC(C)CNC(=O)[C@H](C)NC[C@H](Cc1ccccc1)NC(=O)c1cc(C(=O)N[C@H](C)c2ccc(F)cc2)cc(N(C)S(C)(=O)=O)c1	train
NC1=N[C@](c2ccnc(C(F)(F)F)c2)(c2ccc(F)c(-c3cncnc3)c2)c2cccc(F)c21	train
COC(=O)c1cc(C[C@H](NC(C)=O)C(=O)N[C@H]2CCCCN(Cc3ccc(-c4ccccc4)cc3)C2=O)ccc1C(F)(C(=O)O)C(=O)O	train
CCNC(=O)c1ccc(C(=O)NCCC2CCN(c3ncnc4cc(C(N)=O)sc34)CC2)s1	train
O=C(NCc1ccccc1)C1=CCC[C@H]1C(=O)N1CCC[C@H]1[C@@H](O)CO	train
O=C(NC1(c2ccc(F)cc2)CC1)c1ccc2nc(NC3CCC(O)CC3)c3[nH]cc[n+]3c2c1	train
COc1ccc(/C=N/Nc2n[nH]c(C)c2C(=O)Nc2cccc(NC(C)=O)c2)cc1	train
CC[C@H](C)[C@H](NC(=O)[C@H](OCc1ccccc1)[C@H](O)[C@@H](O)[C@@H](OCc1ccccc1)C(=O)N[C@H](C(=O)NC)[C@@H](C)CC)C(=O)NC	train
CO[C@H](C[C@H](CCCCNCc1ccc(F)cc1)C(=O)NO)c1ccc(F)cc1	train
COc1ccc2c(c1)cc(C(=O)NS(=O)(=O)c1ccc(C)cc1)n2CC(=O)O	train
C[C@@](O[C@@H]1CC(C(=O)O)=C[C@@H](OP(=O)(O)O)[C@H]1O)(C(=O)O)P(=O)(O)O	train
CS(=O)(=O)Nc1cccc(Nc2nccc(Nc3c(Cl)ccc4c3OCO4)n2)c1	train
NC1[C@@H](O)[C@H](O)[C@H](O)[C@@H]1O	train
Cc1ccccc1C(=O)c1c[nH]c(C(=O)NCc2ccco2)c1	train
O=C1CCCC/C=C/CCNC(=O)c2c(O)cc(O)c(Cl)c2C1	train
NS(=O)(=O)CCNC(=O)/C(Cc1ccc(O)c(Br)c1)=N/O	train
CC(C)(COP(=O)(O)OP(=O)(O)OC[C@H]1O[C@@H](n2cnc3c(N)ncnc32)[C@H](O)[C@@H]1OP(=O)(O)O)[C@@H](O)C(=O)NCCC(=O)NCCSCC(=O)NCCc1c[nH]c2ccc(Br)cc12	train
CC(=N)N1CCC(Oc2ccc3c4ccccc4n(Cc4ccc5ccc(C(=N)N)cc5c4)c3c2)CC1	train
CCC(=O)N(CC(=O)OC)c1nc(-c2ccccc2)cs1	train
COc1ccc(CCOc2cc(C3=NN(C4CCCCCC4)C(=O)C3(C)C)ccc2OC)cc1	train
NC(=Nc1cccc(COC[C@@H]2C[C@H](OCc3cccc(N=C(N)c4cccs4)c3)CN2)c1)c1cccs1	train
N#CC[C@@H]([C@H]1CCN(c2cccc(Cl)c2C#N)C1)n1cc(-c2ncnc3[nH]ccc23)cn1	train
COc1ccc(-c2c(C(=O)NS(=O)(=O)c3ccccc3)n(Cc3cccc(C(F)(F)F)c3)c3ccccc23)cc1	train
Nc1ccc(Nc2nc(Nc3cc(C4CC4)[nH]n3)c3ccccc3n2)cc1	train
CC(C)CN(C[C@@H](O)[C@H](Cc1ccccc1)NC(=O)O[C@H]1CO[C@H]2OCC(F)(F)[C@H]21)S(=O)(=O)c1ccc(N)cc1	train
CCCCCCOc1cccc(Cn2ccc(O)c(C(=O)O)c2=O)c1	train
CC(=O)Nc1cc2ncccc2c(-c2cccc(C)c2C)n1	train
CN[C@@H](C)C(=O)N[C@H](C(=O)N1CC[C@H]2CC[C@H](NC(=O)C(c3ccccc3)c3ccccc3)[C@H]21)C(C)(C)C	train
O=C(O)CCCc1nc(-c2cccc([N+](=O)[O-])c2)no1	train
NS(=O)(=O)c1ccc(C(=O)N2CCN(C(=O)c3ccccc3Cl)CC2)cc1	train
Nc1nc(NC2CCCCC2)c2c(-c3ccccc3)c(-c3ccccc3)[nH]c2n1	train
CN1CCN(c2ccc(C(=O)Nc3n[nH]c4cn(C(=O)Cc5cccs5)cc34)cc2)CC1	train
Cc1c2c(c(O)c3c(O)cccc13)C(=O)[C@]1(O)C(O)=C(C(N)=O)C(=O)[C@@H](N(C)C)[C@@H]1C2	train
CC(/C=C/c1c(C)cc(O)c(C)c1C)=C\C=C\C(C)=C\C(=O)O	train
O=C(NCc1ccccc1)Nc1ccc2c(c1)[B-](O)(O)OC2	train
Nc1cc(Cn2c(C(=O)O)c(-c3ccc[nH]c3=O)c3cc(C(F)(F)F)ccc32)ccn1	train
O=C(O)c1ccc(-c2ccc(C(=S)NCc3ccc(-c4ccnn4-c4ccc(Cl)c(Cl)c4)cc3)c(Cl)c2)o1	train
Nc1nc2cc3nc(NCCN4CCOCC4)[nH]c3cc2c(=O)[nH]1	train
COC(=O)[C@@H](Cc1ccccc1)NC(=O)c1cc(C)c(S(=O)(=O)Nc2cc(C(F)(F)F)ccc2Cl)s1	train
CC(=O)c1ccc(N2CCN(C(=O)c3ccc4c(c3)OCO4)CC2)cc1	train
CCCc1c(O)ccc2c(-c3cnc(-c4cnc(C(=O)O)c(O)c4)s3)[nH]nc12	train
Cn1c[n+]([C@@H]2O[C@H](COP(=O)(O)OP(=O)(O)OP(=O)(O)O)[C@@H](O)[C@H]2O)c2nc(N)[nH]c(=O)c21	train
COc1ccc(NC(=O)c2ccc(NC3=C(C)C(=O)CC3)c(Cl)c2)cc1	train
O=c1[nH]c(-c2ccc(F)cc2)c(-c2ccc(F)cc2)cc1O	train
CN1CCN(c2c(Nc3ccc(O[C@H]4O[C@H](CO)[C@@H](O)[C@H](O)[C@@H]4O)c(Cl)c3)c(=O)c2=O)CC1	train
Cc1c(Cl)ccc2c1N=CC2=Cc1[nH]c(=O)n(Cc2ccc(F)c(F)c2)c1O	train
CS(=O)(=O)c1ccc(N[C@@H](c2cccc(Cl)c2)c2ccccn2)c(Nc2ncccn2)c1	train
CCOC(=O)c1c(-c2ccccc2)oc2ccc(O)c(CN3CCCC3)c12	train
Cc1ccc(-c2ccc3nc(N)nc(N)c3c2)cc1	train
CC(C)(C)OC(=O)N[C@@H]1CC[C@@H](n2cnc3cnc4[nH]ccc4c32)C1	train
Cn1cc2c3c(c[nH]c3c1=O)CN(CC1CC1)c1ccc(CS(C)(=O)=O)cc1-2	train
O=C(Nc1ccccc1S(=O)(=O)Nc1ccc(Cl)cn1)c1ccc(-n2ccccc2=O)cc1	train
CCn1nnc2c(C)c([C@@H](CC(=O)O)c3cc(C)c4c(c3)CN(C(=O)c3ccccc3)CC4)ccc21	train
Nc1ncnc2c1c(Cc1cccc3ccccc13)nn2CC1CCNCC1	train
O=C(c1cc2cc(F)ccc2[nH]1)N1C[C@]2(CCN([C@@H]3CCCNC3)C2)c2ccccc21	train
O=C(O)c1ccc2c(c1)C1(OC2=O)c2ccc(O)cc2Oc2cc(O)ccc21	train
COc1ccc(Cl)cc1-c1nn(C)cc1NC(=O)c1cncc2cn[nH]c12	train
CSC[C@H](NC(=O)N[C@@H](CCC(=O)O)C(=O)O)C(=O)O	train
O=c1ccn([C@H]2C[C@H](O)[C@@H](COS(=O)(=O)O)O2)c(=O)[nH]1	train
O=C(NC1CCCCC1)[C@H]([C@@H]1CCCCO1)n1c(-c2ccc(Cl)cc2)nc2cc(F)c(Cl)cc21	train
CNC(=O)N1C[C@@H](C)Oc2cc(C)ccc21	train
Cc1cncc(-c2cnc(N[C@@H]3C[C@H]4CC[C@H](N4)[C@H]3CCC3CCC(F)(F)CC3)c3[nH]c(=O)c(C)cc23)c1	train
NS(=O)(=O)c1ccc(Cc2c(-c3cccc(-c4ccccc4)c3)nn(-c3nc(C(=O)O)cs3)c2CC2CC2)cc1	train
O=C(N[C@H]1CCCC[C@H]1C(=O)O)c1c[nH]n2c(=O)cc(-c3ccccc3)nc12	train
CC#Cc1cncc(-c2cccc([C@@]3(C4CC4)N=C(N)N(C)C3=O)c2)c1	train
COCO[C@H]1C[C@H]2O[C@H]3CC=CCO[C@@H]3[C@@H](O)[C@@H]2O[C@@H]1CC(=O)O	train
O=c1cc(N2CCOCC2)oc2c(-c3ccc4c(c3)OCCO4)csc12	train
Nc1nc2c(ncn2[C@@H]2O[C@H](CO)[C@H]3O[C@@H](CP(=O)(O)O)O[C@H]32)c(=O)[nH]1	train
O=C1NC(=O)[C@@H](c2cn(-c3ccccc3)nc2-c2ccc(F)cc2)N1	train
COc1ccc(-c2c(-c3cc(Cl)c(O)cc3O)noc2NC(C)=O)cc1	train
CC(C)[C@H](NC(=O)[C@H](Cc1ccccc1)NC(=O)OCc1ccccc1)P(=O)(O)O[C@@H](Cc1ccccc1)C(=O)O	train
O=C1c2c(c(C(F)(F)F)nn2-c2cccc(-c3n[nH]c(=O)[nH]3)c2)CCN1c1ccc(-c2ccccc2CN2CC[C@@H](O)C2)cc1	train
O=C(C[C@@H](Cc1cccc(O)c1)C(=O)N[C@H]1c2ccccc2C[C@H]1O)NO	train
Cc1c(O)ccc2c1CCN(CC(C)C)[C@@H]2c1ccc(/C=C/C(=O)O)cc1	train
O=C(O)c1cccc(C[C@H](NS(=O)(=O)Cc2ccccc2)B(O)O)c1	train
O=C1Nc2ccc(F)cc2S(=O)(=O)N1	train
CCCC[C@@H](NC(=O)[C@@H]1CCCN1C(=O)CCP(=O)(O)[C@H](Cc1ccccc1)NC(=O)[C@@H]1CCCN1C(=O)CN)C(=O)O	train
Nc1nc(SCc2ccc(Cl)cc2Cl)n[nH]1	train
O=C(Oc1cncc(Cl)c1)c1cccc2c1CCN2	train
O=C(CCNC(=O)c1ccc(OC(F)(F)F)cc1)N[C@@H]1CCCc2ccccc21	train
CCCCN(C)C(=O)c1cc(-c2n[nH]c(=O)n2-c2ccccc2F)c(O)cc1O	train
O=C(Nc1cc(C(F)(F)F)ccc1N1CCN(Cc2ccccn2)CC1)c1ccc(-c2ccncc2)o1	train
N#Cc1nc(CCCN2CCCCC2)cc(-c2cccc(C(F)(F)F)c2)n1	train
Cc1ccc(NC(=O)c2ccc3c(c2)N(C2CCCC2)[C@H](C)C(=O)N3C)c(C)c1	train
CCOc1ccc(C(C)=O)cc1-c1cccc(-c2nn[nH]n2)c1	train
NS(=O)(=O)c1ccc(Nc2nccc(-c3cnc4ccccn34)n2)cc1	train
CN1[C@@H]2CC[C@H]1CC(OC(=O)c1c[nH]c3ncccc13)C2	train
C[C@](O)(COc1ccc(C#N)cc1)C(=O)Nc1ccc(C#N)c(I)c1	train
Cc1nc2c(C#N)cccc2n1-c1ccc(C(=O)NC2CC2)s1	train
Cn1cc(-c2ccnc3c2OCCNC3)c(-c2ccc(F)cc2)n1	train
O=c1cccc[nH]1	train
CC1(C)CN=C(N2CCN(c3ncnc4sc(CC(F)(F)F)cc34)CC2)S1	train
CCCCC[C@@H](C(=O)NCNC(=O)c1ccc(-c2ccc(C(=O)N[C@@H](CC(=O)O)C(=O)O)c(OCC)c2)o1)[C@@H](CC)N(O)C=O	train
C/C=C/C(=O)C[C@H]1CC[C@H](C)[C@H](CC(=O)NC[C@H](O)[C@H](C)C(=O)NCCC[C@H]2O[C@@]3(CCC[C@@H](CC[C@H](C)/C=C(\C)[C@H](C)O)O3)CC[C@@H]2C)O1	train
COc1cc2c(Nc3ccc(NC(=O)c4ccccc4)cc3)ncnc2cc1OCCCN1CCOCC1	train
COc1ccc([C@]2(C34CC5CC(CC(C5)C3)C4)N=C(N)N(C)C2=O)cc1C	train
CN(C)CCNS(=O)(=O)c1ccc(-c2cnc(N)c(C(=O)Nc3cccnc3)n2)cc1	train
Nc1cc(Cn2c(C(=O)O)c(-n3c(=O)[nH]c4cscc4c3=O)c3cc(C(F)(F)F)ccc32)ccn1	train
Cc1ccccc1-c1ccc(-c2ccc3c(c2)c(C)c(CC(C)(C)C(=O)O)n3Cc2ccc(Cl)cc2)cc1F	train
CC(C)COC(=O)N[C@H](CO)C(=O)N[C@@H](C)C(=O)N[C@H](C=O)CCCN=C(N)N	train
CO[C@@H](C(=O)NCCOc1c(C)cc(C)cc1C)[C@H](O)[C@@H](O)[C@H](O)/C=C/C(C)(C)C	train
NS(=O)(=O)c1cc([N+](=O)[O-])ccc1Cl	train
COc1cccc2c(=O)[nH]c(-c3ccc(C)cc3)nc12	train
CNc1ccc(Nc2ccccc2C(=O)O)c(-c2ccccc2)c1Cl	train
Cc1cc(N)nc(CCc2cccc([C@H](N)Cc3cc(C)cc(N)n3)c2)c1	train
Cc1ncc(-c2ccc(S(N)(=O)=O)cc2)o1	train
c1cc(OC[C@H]2CCCN2c2ccnc3ncnn23)c2ccncc2c1	train
Cc1cc(NC(=O)CCCC[C@@H]2SC[C@@H]3NC(=O)N[C@@H]32)cc(C)c1OCC(=O)N[C@@H](Cc1ccccc1)[C@H](O)C(=O)N1CSC(C)(C)[C@H]1C(=O)N[C@H]1c2ccccc2C[C@H]1O	train
CC(C)(C)OC(=O)N[C@@H](Cc1ccccc1)CN(O)C=O	train
N#C/C(=C\c1cn(Cc2ccc(F)cc2)c2cc(Cl)ccc12)c1ccc(C(=O)O)cc1	train
CC(=O)Nc1cc(Nc2cc(NC3CC3)n3ncc(C#N)c3n2)ccc1N(C)CCN(C)C	train
O=C(CP(=O)(O)O)OC1[C@@H](OP(=O)(O)O)[C@H](OP(=O)(O)O)C(OCc2ccccc2)[C@H](OP(=O)(O)O)[C@H]1OP(=O)(O)O	train
Nc1nc2[nH]c(CCCCCCC(=O)N[C@@H](CCC(=O)O)C(=O)O)cc2c(=O)[nH]1	train
NCC(=O)Nc1ccc(OCc2ccccc2)cc1	train
CC1CCC(C(=O)N(c2cc(-c3ccccc3)sc2C(=O)O)C(C)C)CC1	train
Cc1cn([C@H]2CCCN(Cc3ccc(C(=O)O)c(Oc4cccc(C(F)(F)F)c4)c3)C2)c(=O)[nH]c1=O	train
NS(=O)(=O)c1ccc(C(=O)N2CCN(C(=O)c3ccccc3)CC2)cc1	train
NC(N)c1ccc([C@H]2[C@H]3C(=O)N(Cc4ccc(F)cc4)[C@H](C(F)F)[C@H]3[C@@H]3CCCN32)cc1	train
CC(C)c1nnc2ccc(-c3ocnc3-c3ccc(F)cc3)cn12	train
O=C(O)c1ccccc1-c1c2cc(I)c(=O)c(I)c-2oc2c(I)c(O)c(I)cc12	train
CCc1cnn2c(NCc3cnc(N)nc3)cc(-c3c(F)cccc3F)nc12	train
Cn1cc(-c2nc(C(=O)N=C(N)N)c(N)nc2N2CCCCCC2)cn1	train
NS(=O)(=O)c1ccc2ccccc2c1	train
O=C(Nc1cn[nH]c1-c1ccccn1)c1nn(C2CCNCC2)cc1Cl	train
CN(C)C(=O)c1cccc(-c2cn(C)c(=O)c3[nH]ccc23)c1	train
O=C(O)c1ccc(-c2c(F)cccc2F)cc1	train
CN(C)CC(=O)Nc1ccc2[nH]c(=O)c3ccccc3c2c1	train
COc1ccc(OCCCCCC(=O)O)cc1Cc1cnc2nc(N)nc(N)c2c1C	train
COc1ccc(S(=O)(=O)N(CC(C)C)C[C@@H](O)[C@H](Cc2ccccc2)NC(=O)O[C@H]2C[C@H]3OC(=O)N(c4ccccc4)[C@H]3C2)cc1	train
O=C(Nc1cccnc1)c1ccc2c(c1)ncn2CC1CCN(C(=O)c2ccccc2)CC1	train
c1nc2nc(Nc3ccc(N4CCOCC4)cc3)nc(NC3CCCCC3)c2[nH]1	train
CC(=O)CC[C@H](C[C@@H]1CCNC1=O)NC(=O)[C@H](CC(C)C)NC(=O)[C@H](CNC(=O)C(C)(C)C)NC(=O)OCc1ccccc1	train
OB(O)c1ccc2ccccc2c1	train
CC[C@@]1(C(=O)N[C@H](C)c2ccc(Cl)cc2)[C@@H](C)C1(Cl)Cl	train
COc1cnc2c(NCc3nnc4ccc(-c5cc(C)ns5)nn34)ccnc2c1	train
O=C(N[C@@H](Cc1ccccc1)[C@@H](O)C[C@]1(Cc2ccccc2)NC=C([C@@H]2CNC(=O)c3ccccc32)C1=O)O[C@H]1CCOC1	train
Cc1nccn2c(NC(=O)CN3c4ccccc4Oc4ccccc43)c(-c3ccccc3)nc12	train
O=c1[nH]cnc2c(CN3C[C@H](O)[C@H](O)[C@H]3CO)c[nH]c12	train
CNS(=O)(=O)c1ccc2cccc(CCNC(C)=O)c2c1	train
NS(=O)(=O)c1ccc(SCCO)cc1	train
O=C(NO)[C@@H](Cc1ccc2ccccc2c1)NS(=O)(=O)c1ccc2ccccc2c1	train
Cc1n[nH]c(C)c1-c1cccc2c(CCCOc3cccc4ccccc34)c(C(=O)O)[nH]c12	train
CCCCCCCCCCCCCCCC(=O)N[C@H](CC(=O)[O-])C[N+](C)(C)C	train
N#Cc1ncccc1CSc1[nH]c(=O)c(C#N)c2c1COCC2	train
O=C(NCCCN1CCCC1)c1ccnc(-c2ccccc2OC2CN(CCc3ccc(Cl)c(Cl)c3)C2)c1	train
C#CC[C@H](NC(=O)N[C@@H](CCCCNC(=O)c1ccc(I)cc1)C(=O)O)C(=O)O	train
O=C(O)CC[C@H](NC(=O)N[C@@H](CCCCNC(=O)c1ccc(I)cc1)C(=O)O)C(=O)O	train
CCONC1=NC[C@@H](Cc2cc(Cl)ccc2OC)C(=O)N(C(=O)N[C@H](CC)c2ccc(C(=O)O)cc2)C1	train
COc1cc2c(cc1Nc1nc(Nc3ccsc3C(N)=O)c3cc[nH]c3n1)N(C(=O)CN(C)C)CCC2(C)C	train
CN(C)[C@H]1CN([C@H]2CCc3cccc(F)c32)C[C@@H]1c1ccc(N2CCN(S(C)(=O)=O)CC2)cc1	train
O=C1Nc2ccc3ncsc3c2/C1=C/c1cnc[nH]1	train
COc1cc(Nc2nc3cccc(-c4cccc5[nH]cnc45)c3o2)cc(OC)c1OC	train
Cc1ccc(Cl)cc1-n1cc(-c2ncnn3cccc23)cc1C(N)=O	train
Cc1cccc2c1C1(CCN(C(=O)c3ccc4[nH]ncc4c3)CC1)C(=O)N2CC(=O)NCC(F)(F)F	train
COc1cccc(CNC(=O)c2nc3ccc(F)c(OCCc4ccc(C(=O)O)cc4)c3c(=O)[nH]2)c1	train
O=c1cc(-c2ccc(O)c(O)c2)oc2cc(Cl)cc(O)c12	train
C[C@H](O)C1CCN(c2nccnc2Oc2ccc(Nc3nc4ccccc4s3)cc2)CC1	train
NCCCNc1nc(Nc2cccc(NC(=O)N3CCCC3)c2)ncc1I	train
O=C1CNC(=O)N1Cc1ccc(-c2nc3ccccc3c(=O)[nH]2)cc1	train
C[C@H]1[C@@H](O)[C@@H](O)[C@H](O)C[C@@H]1NC(=O)c1ccccc1	train
O=C(CP(=O)(O)O)OC1[C@@H](OP(=O)(O)O)[C@H](OP(=O)(O)O)C(OP(=O)(O)O)[C@H](OP(=O)(O)O)[C@H]1OP(=O)(O)O	train
CC(C)CN(C[C@@H](O)[C@H](Cc1cc(F)cc(F)c1)NC(=O)O[C@H]1[C@H]2CO[C@H]3OC[C@@H]1[C@H]3C2)S(=O)(=O)c1ccc2nc(NC3CC3)sc2c1	train
Nc1c(N2CCc3ccc(CNC(=O)c4nc5sc6c(c5c(=O)[nH]4)CCS(=O)(=O)C6)cc3C2)c(=O)c1=O	train
O=C(c1ccc(C(F)(F)F)cc1)[C@H]1CNC[C@@H]1c1ccc2c(=O)[nH]cnc2c1	train
C[C@H]1CC[C@@H](NC(=O)OC(C)(C)C)CN1c1cc(-c2ccc3c(N)n[nH]c3c2)nc(N)n1	train
CCS(=O)(=O)c1ccc(CC(=O)Nc2nc(-c3cccc(Cl)c3)c(C(=O)c3ccccc3Cl)s2)cc1	train
O=C(O)CC[C@H](NC(=O)N[C@@H](CCCCNC(=O)Nc1ccccc1OCCNC(=O)CCOCCOCCOCCOCCOCCOCCOCCOCCOCCOCCOCCOCCNC(=O)CCCC[C@@H]1SC[C@@H]2NC(=O)N[C@@H]21)C(=O)O)C(=O)O	train
COc1cc(-c2ccc(N=Nc3ccc4c(S(=O)(=O)O)cc(S(=O)(=O)O)c(N)c4c3O)c(OC)c2)ccc1N=Nc1ccc2c(S(=O)(=O)O)cc(S(=O)(=O)O)c(N)c2c1O	train
Cc1ncn(-c2nc3c(C(=O)N[C@@H](c4ccc(OC(F)(F)F)cc4)C(C)(C)O)cnn3cc2C)n1	train
NC1=N[C@@]2(CO1)c1cc(-c3cccnc3F)ccc1Oc1cnc(-c3ccnc(F)c3)cc12	train
OC[C@H]1N=C(NO)[C@H](O)[C@@H](O)[C@@H]1O	train
COCCNS(=O)(=O)c1ccc(Nc2nccc(-c3cnc(C)n3C(C)C)n2)cc1	train
COC(=O)Nc1ccc2c(c1)NC(=O)[C@H](C)CCC[C@H](N1CCC(c3c(F)ccc(Cl)c3F)=CC1=O)c1cc-2ccn1	train
NC(N)=NCCCNC(=O)[C@@H]1CCCCN1C(=O)[C@@H](CC1CCCCC1)NCC(=O)O	train
Cc1cc(N2CCC[C@@H](C(=O)Nc3ccc4ccccc4c3)C2)n2ncnc2n1	train
COCCOc1cnc2ccc([C@H](C)c3nnc4c(F)cc(-c5cc(C)no5)cn34)cc2c1	train
C=CC(=O)N[C@H]1COC[C@H]1Nc1ncc2cc(-c3c(Cl)c(OC)cc(OC)c3Cl)c(=O)n(C)c2n1	train
Nc1ncnc2c1ncn2[C@@H]1O[C@H](C(F)F)[C@@H](O)C1O	train
Cc1cc(C(=O)Nc2cc(Cl)cc(N3CCCCC3)c2)cc(C)c1OCCN	train
CC(C)(C)c1ccc(S(=O)(=O)NCc2ccc(C(=O)Nc3cccnc3)cc2)cc1	train
O=[N+]([O-])c1c(Nc2cc(F)cc(Cl)c2)ccc2nonc12	train
CC[C@@H]1C(=O)N(C)c2cnc(-n3ccnc3-c3cscn3)nc2N1C1CCCC1	train
CC(=O)N1CCc2c(c(N3CCCc4cc(-c5cnn(C)c5)ccc43)nn2[C@H]2CCOC2)C1	train
Cc1ccc(C)c(NC(=O)Nc2cc(S(N)(=O)=O)ccc2O)c1	train
C[C@@H](CS(C)(=O)=O)Nc1ncc2cc(Oc3ccc(F)cc3F)c(=O)n(C)c2n1	train
CC(=O)N(O)CC[C@@H](c1ccc(Cl)c(Cl)c1)P(=O)(O)O	train
Oc1ccc(-c2n[nH]c(=S)n2-c2ccccc2F)c(O)c1	train
COCCN1CCC(C(=O)NO)(S(=O)(=O)c2ccc(OCCCn3nnc(-c4ccc(OC(F)(F)F)cc4)n3)cc2)CC1	train
CN1CC(C(=O)N[C@@H](CCCCCC(O)(O)c2ccon2)c2ncc(-c3ccccc3F)[nH]2)C1	train
Nc1ncnc2c1ncn2[C@@H]1O[C@H](CNS(=O)(=O)NC(=O)CCCC[C@@H]2SC[C@@H]3NC(=O)N[C@@H]32)[C@@H](O)[C@H]1O	train
NCc1ccc(Cl)cc1CNC(=O)[C@@H]1CCCN1C(=O)[C@@H](CCCN=C(N)N)NS(=O)(=O)Cc1ccccc1	train
COc1cc(-c2cncc(-c3ccc(C4CCN(C)CC4)cc3)c2C)cc(OC)c1OC	train
NNC(=O)c1[nH]c2ccc(S(N)(=O)=O)cc2c1-c1ccccc1	train
N=C(N)c1ccc2cc(C(=O)Nc3ccc(CN)cc3)ccc2c1	train
COc1ccc2c(c1CN1CCNCC1)O/C(=C\c1c[nH]c3ccccc13)C2=O	train
O=C(O)c1ccccc1Nc1cc(Cl)c(OCCCCCCCOc2c(Cl)cc(Nc3ccccc3C(=O)O)cc2Cl)c(Cl)c1	train
CNCc1cc(-c2cn(C)nc2-c2ccc(F)cc2)ccn1	train
Cc1ccc(C(N)=O)cc1-c1nnc2ccc(CCc3ccc(F)cc3F)cn12	train
CCS(=O)(=O)Nc1cc(-c2cn(C)c3c(=O)[nH]ccc23)cc2c1ccn2C(C)(c1ccccn1)c1ccccn1	train
O[C@H]1[C@H]2[C@H](O)CCCN2C[C@H]1O	train
O=C(c1c(O)cc(Cl)cc1Cl)N1CCC2(CCC2)C1	train
Nc1nc2ccc(SCc3ccc(Cl)c(Cl)c3)cc2s1	train
O=C(Cc1ccc(OC(F)(F)F)cc1)Nc1cc(C2CC2)[nH]n1	train
Nc1nnc(-c2ccccc2O)cc1N1CCNCC1	train
O=C(NCc1ccc(S(=O)(=O)C2CCN(C3CCOCC3)CC2)cc1)n1cc2ccncc2c1	train
FC(F)c1nnc(N2CCN(c3ncnc4sc(CC(F)(F)F)cc34)CC2)s1	train
Nc1nnc(SCC(=O)Nc2ccc(S(N)(=O)=O)cc2)s1	train
O=C(NCCC#Cc1cc(Nc2nccc(-c3ccn([C@H](CO)c4ccc(Cl)c(F)c4)c(=O)c3)n2)ccn1)O[C@H]1CC/C=C\CCC1	train
COc1ccc(Cl)cc1-c1nn(C)cc1NC(=O)c1cnn2cccnc12	train
Nc1nc2ccccc2c(=O)[nH]1	train
CNC(=O)c1cccc(Nc2nc(N)n(C(=O)c3c(F)cccc3OC)n2)c1	train
Cc1ncc(-c2ccnc(Nc3ccc(N4CCN(C(=O)CO)CC4)cc3)n2)n1C(C)C	train
O=S1(=O)Cc2ccc(N=Cc3c(O)[nH]c4ccc(-c5cnco5)cc34)cc2C1	train
Nc1nc(Nc2ccc(S(N)(=O)=O)cc2)nn1C(=S)Nc1c(F)cccc1F	train
CC(=O)Nc1ccc2c(S(=O)(=O)O)cccc2c1S(=O)(=O)O	train
C[C@](O)(COc1ccc(F)cc1)C(=O)Nc1ccc([N+](=O)[O-])c(C(F)(F)F)c1	train
NC(=O)C1=CN([C@@H]2O[C@H](COP(=O)(O)OP(=O)(O)OC[C@H]3O[C@@H](n4cnc5c(N)ncnc54)[C@H](O)[C@@H]3O)[C@@H](O)[C@H]2O)CC=C1	train
COc1ccc2c(-n3c(=O)n(Cc4cccc([C@@]5(C)OC(=O)NC5=O)c4)c4ccccc43)noc2c1	train
COc1ccc(S(=O)(=O)N(Cc2ccc3c(c2)OCO3)[C@H](Cc2cccs2)C(=O)NO)cc1	train
Cc1ccc(-c2ncnc(Nc3ccc(C(=N)N)cc3Cl)c2O)cc1	train
CNC(=O)[C@@H]1C[C@H](N2CCc3c(ncnc3OCCC3CC3)C2)CN1C(=O)c1ccc(CN)c(OC)c1	train
CC(C)[C@H](NC(=O)N(C)Cc1ccccn1)C(=O)N[C@@H](Cc1ccccc1)C(O)(O)C(F)(F)[C@H](Cc1ccccc1)NC(=O)[C@@H](NC(=O)N(C)Cc1ccccn1)C(C)C	train
NS(=O)(=O)c1cc(C(=O)NCCCO)c(Sc2ccccc2)cc1Cl	train
CCOC(=O)c1[nH]cc2c1NC1=C(C(=O)CCC1)[C@H]2c1ccc(Sc2nc3ccccc3[nH]2)o1	train
O=C(O)CCCC[C@@H]1SC[C@H]2[C@@H]1NC(=O)N2C(=O)OCc1ccccc1	train
CC(C)[C@H](NS(=O)(=O)c1ccccc1)P(=O)(O)C[C@H](C(=O)O)c1cccc(CN)c1	train
O=C(N[C@@H](Cc1ccc(F)cc1)C(=O)N1CCC(O)CC1)c1cc2cc(Cl)ccc2[nH]1	train
CC(C)CN1[C@H](c2ccc(/C=C/C(=O)O)cc2)c2ccc(O)cc2C[C@H]1C	train
O=C1NC(=O)c2cc(-c3ccccn3)[c-]cc21	train
CCC(=O)Nc1ccccc1Nc1nc(Nc2ccnc(C#CCCNC(=O)O[C@H]3CC/C=C\CCC3)c2)ncc1Cl	train
COc1cc[nH]c1/C=C1\C(=O)Nc2ccc(F)c(C#C[C@@H](O)[C@@H](N)[C@@H](C)O)c21	train
O=C(O)C[C@@](O)(CC(=O)NCCC[C@@H](NC(=O)C[C@@](O)(CC(=O)O)C(=O)O)C(=O)O)C(=O)O	train
COC(=O)c1coc(-c2ccc(S(=O)(=O)N(CC(C)C)C[C@@H](O)[C@H](Cc3ccccc3)NC(=O)O[C@H]3CO[C@H]4OCC[C@H]43)cc2)n1	train
CC(C)(F)C[C@H](N[C@@H](c1ccc(-c2ccc(S(C)(=O)=O)cc2)cc1)C(F)(F)F)C(=O)NC1(C(N)S)CC1	train
Cc1c(Oc2nc(N)ns2)cc2c(c1C)[C@@H](CC(=O)O)OB2O	train
C[C@H]1NCCC[C@@H]1Nc1ncc(C(N)=O)c2sc(-c3ccccc3)cc12	train
CCCCC[C@@H](O)/C=C/[C@@H]1[C@@H](C/C=C\CCCC(=O)O)[C@H]2CO[C@@H]1C2	train
Cc1noc(C)c1-c1cc(C(=O)NCc2ccc(S(C)(=O)=O)cc2)c(=O)n(-c2cccc(Cl)c2)c1C	train
CC(C)(C)n1[nH]c(-c2ccc(Cl)cc2Cl)c(C(=O)c2ccc(S(C)(=O)=O)cc2Cl)c1=O	train
Nc1c(C(=O)NCc2ccc(C(=O)NCCCC3CCCCC3)cc2)cnn1-c1ccccc1	train
NC1CCC(Nc2cncc(-c3cccc(/C=C4\SC(=O)NC4=O)c3)n2)CC1	train
Cc1ccc(CS(=O)(=O)Nc2ccc(C#N)c(C3CC3)c2)cc1	train
CCCc1cc(-c2cc(C(=O)N(CCN(C)C)Cc3ccccc3)cc(C(F)(F)F)c2)nc(C#N)n1	train
Cc1cc(=O)[nH]c(SCC(=O)c2ccc(S(N)(=O)=O)c(Cl)c2)n1	train
CN(C)C/C=C\c1cc(F)ccc1S(=O)(=O)Nc1ccc2c(c1C(=O)O)CCCC2	train
CC(C)[C@@H](NS(=O)(=O)Cc1ccccc1)C(=O)N1CCC[C@H]1C(=O)NCc1ccc(C(=N)N)cc1	train
CC(C)(C)C(=O)Oc1ccc2c(c1)nc(NC(=O)c1cccc([N+](=O)[O-])c1)n2CCCO	train
Cc1c(-c2ccc(-c3ccccc3)cc2)nc2ccc(F)cc2c1C(=O)O	train
COc1ccc(Br)cc1-c1nc(N)nc2nc[nH]c12	train
C[C@@H]1C[C@H]1CNC(=O)[C@@H]1C[C@H]1[C@]12COC[C@H]1CSC(N)=N2	train
NS(=O)(=O)c1ccc(C(=O)NCc2cc(F)c(F)c(F)c2)cc1	train
COc1ccc2c(c1)cc(C(=O)NS(=O)(=O)Cc1ccc(C(F)(F)F)cc1)n2CC(=O)O	train
CNc1nccn1Cc1csc(C(=O)Nc2c(OC)cc(Cl)cc2C(=O)Nc2ccc(Cl)cn2)c1Cl	train
CO[C@@H]1CC/C=C/c2cccc(c2)[C@@H](C)OC(=O)[C@@H]2CCCN(N2)C(=O)[C@H](C)NC(=O)[C@H](C(C)C)NC(=O)[C@@H]1C	train
O=C1C[C@@]2(C(=O)N1)C(=O)N(Cc1ccc(Br)cc1F)C(=O)c1ccc(F)cc12	train
Cc1cccc(C)c1-n1c(=O)c2cnc(Nc3ccc(N4CCN(C)CC4)cc3)nc2n2c3ccccc3nc12	train
Nc1c(O)cccc1C(=O)NS(=O)(=O)NC[C@H]1O[C@@H](n2cnc3c(N)ncnc32)[C@H](O)[C@@H]1O	train
Cc1cccc(Cl)c1NC(=O)c1cnc(Nc2cccc(C(=O)N3CC[C@H](C(=O)O)C3)c2)s1	train
O=C(O)c1cc(-c2ccc(CNC(=S)c3ccc(-c4ccc(C(=O)O)o4)cc3)cc2)n(-c2ccc(Cl)c(Cl)c2)n1	train
NS(=O)(=O)c1ccc(-n2cc(CNC(=S)Nc3ccc(-c4c5ccc(=O)cc-5oc5cc(O)ccc45)c(C(=O)O)c3)nn2)cc1	train
CN(C)CCOP(=O)(O)OP(=O)(O)O	train
CCc1nc(N)nc(N)c1C#CCc1cc(OC)cc(-c2cccc3cnccc23)c1	train
CC[C@H](NC(=O)C[C@H](O)[C@H](CC(C)C)NC(=O)[C@@H](NC(=O)[C@H](Cc1cccc2ccccc12)NC(C)=O)C(C)C)C(=O)N[C@@H](Cc1cccc2ccccc12)C(N)=O	train
Nc1ccccc1Nc1ccc2c(c1)CCc1ccccc1C2=O	train
Cc1c(NC(=O)c2ccc(C(C)(C)C)cc2)cccc1-c1ncnc2[nH]c(-c3ccc(C(=O)N4CCN(C)CC4)cc3)cc12	train
Cc1cc(Cn2c(N3CCNCC3)nc3c(C4=CCNCC4)cc(Cl)cc32)cc(C)c1F	train
Cc1cc(N)nc2cc(-c3ccc(OCc4ccccn4)c(CN)c3)ccc12	train
COc1ncc(-c2nc(C(=O)N=C(N)N)c(N)nc2N)cn1	train
N#Cc1cc(F)cc(Oc2ccc3c(c2C(F)F)[C@@H](O)C(F)(F)S3(=O)=O)c1	train
CNC(=O)c1cccc(C)c1Nc1nc(N2CCN(c3ccccc3Cl)CC2)nc(N2CSC[C@H]2C(=O)NCC(=O)NO)n1	train
CCCc1cc(=O)n2[nH]c(NCc3ccc(Cl)cc3)c(C#N)c2n1	train
COc1c(NC(=O)c2ccc(NC(=O)c3ccc(NC(=O)[C@H](CC#N)NC(=O)c4ccc(NC(=O)/C(C)=C/c5ccc(O)cc5)cc4)cc3)c(OC)c2O)ccc(C(=O)O)c1O	train
O=C(O)c1ccc([C@H]2C[C@H]3[C@@H](N2)[C@H](c2cccc(Cl)c2F)[C@]2(C(=O)Nc4cc(Cl)ccc42)N3CC2CC2)cc1	train
COc1cc2c(cc1[C@H](CN1CCCC1)c1ccc(-c3ccc(C(=O)NS(=O)(=O)c4ccc(N[C@H](CCN5CCOCC5)CSc5ccccc5)c(S(=O)(=O)C(F)(F)F)c4)cc3)cc1)OCO2	train
COc1ccc(C(=O)Nc2c(Cl)cncc2Cl)cc1OC1CCCC1	train
N=[N+]=NCCCCCCCCN[C@@H]1[C@@H](O)[C@H](O)[C@@H](O)[C@H](O)[C@H]1CO	train
O=C(NCCCCCNC(=O)c1cccc(O)c1O)c1cccc(O)c1O	train
CS(=O)(=O)c1cccc(-c2cc(Cl)ccc2[C@@H](Oc2cc(N3CCC4(CC3)CN[C@H](C(=O)O)C4)nc(N)n2)C(F)(F)F)c1	train
NC(=O)c1cccc2[nH]c(C(=O)N3CC[C@@H](N)C3)nc12	train
CC[C@H](C)CNC(=O)C[C@H](O)[C@H](CC(C)C)NC(=O)[C@H](CCCCNC(=S)NC)NC(=O)[C@H](Cc1ccccc1)NS(=O)(=O)N(C)C	train
O=C1C[C@H]2CCC[C@@H](C1)N2CCc1ccc(Cl)cc1	train
Cn1c(=O)c(C(=O)NCC(=O)O)c(O)c2ccccc21	train
CNc1cc(-c2cccc(Cl)c2Cl)nc(N)n1	train
N#Cc1ccc2c(c1)[nH]c(=O)n2C1CC(c2nnc(-c3ccncn3)n2-c2ccccc2Cl)C1	train
C[C@@]1(c2nc3c(C(N)=O)cccc3[nH]2)CCCN1	train
CCc1cc(-c2n[nH]c(C)c2-c2ccccc2F)c(O)cc1O	train
O=c1nc2nc(NC3CCC(O)CC3)ncc2cn1-c1ccccc1Cl	train
Cc1sc2c(c1C)C(c1ccc(Cl)cc1)=N[C@@H](CC(=O)OC(C)(C)C)c1n[nH]c(C)[n+]1-2	train
C[C@H]1CC[C@@H](O)[C@H]1NC(=O)[C@H](Cc1ccccc1)C[C@H](O)CN1CCN(C(=O)c2cnc(N3CCN(C)CC3)c(Cl)n2)C[C@H]1C(=O)NC(C)(C)C	train
COc1cc(C)c(Sc2cnc(NC(=O)c3ccc(CN[C@@H](C)C(C)(C)C)cc3)s2)cc1C(=O)N1CCN(C(C)=O)CC1	train
Cc1cc2n[nH]c(=O)n2c2cc(-c3ccc[nH]3)ccc12	train
CN1CC2=C(C(=O)N1)[C@@H](c1ccc(C#N)cc1)NC(=O)N2c1cccc(C(F)(F)F)c1	train
COC(=O)NCCCCCC(=O)N[C@@H]1O[C@H](CO)[C@H](O)[C@H](O)[C@H]1O	train
Cn1ncc(-c2nc(NC3CCC(N)CC3)ncc2F)c1CC1CC1	train
N=C(N)c1ccc(CNC(=O)[C@@H]2CCCN2C(=O)[C@@H](CC2CCCCC2)NS(=O)(=O)Cc2ccccc2)cc1	train
Nc1c([N+](=O)[O-])ncn1[C@@H]1O[C@H](COP(=O)(O)O)[C@@H](O)[C@H]1O	train
Cc1cc(N)nc2cc(-c3ccc(CCN)cc3)ccc12	train
CCC(C)(C)c1ccc(OC[C@H](O)CN2C[C@@H]3C[C@H](C2)c2cccc(=O)n2C3)c(C(C)(C)CC)c1	train
NS(=O)(=O)c1ccc(NC(=O)Cc2cccs2)c(F)c1	train
CC(=O)N[C@@H](Cc1cc(F)cc(F)c1)[C@H](O)CNC1(c2cccc(C(C)(C)C)c2)CCCCC1	train
CCCN(CCc1ccccc1)C(=O)[C@@H]1OC(C(=O)O)=C[C@H](N)[C@H]1NC(C)=O	train
Nc1ccc2ccc(CNc3cccc(F)c3)cc2n1	train
C=C[C@@H]1C[C@]1(NC(=O)[C@@H]1C[C@@H](Oc2nc3cc(OC)ccc3nc2Cl)CN1C(=O)[C@@H](NC(=O)OCCCCC)C(C)(C)C)C(=O)NS(=O)(=O)C1(C)CC1	train
N#Cc1cccc(-c2csc(Nc3cc(F)ccc3O)n2)c1	train
Cc1ccc(-c2ccc(CCC(=O)N[C@@H](CCC(=O)O)C(N)=O)cc2)s1	train
NS(=O)(=O)c1ccc(C(=O)NCc2ccc(F)cc2F)cc1	train
NS(=O)(=O)c1ccc(-n2cc(-[c-]3cccc3)nn2)cc1	train
CC(C)[C@@H](NC(=O)c1cc(C(F)(F)F)ccc1F)C(=O)N1CCC2(CC1)C(=O)N(C)C(=O)N2c1ccc2[nH]ncc2c1	train
Cc1[nH]c(C(=O)N[C@@H]2CCN(c3ncc(C(=O)O)s3)C[C@@H]2F)c(Cl)c1Cl	train
C[C@]1(CS(=O)(=O)N2CCN(c3ncc(OCc4cccc(C#N)c4)cn3)CC2)NC(=O)NC1=O	train
CN1C(=O)N(c2ccc(C#N)c(C(F)(F)F)c2)C(=O)[C@@]1(C)c1ccc(O)cc1	train
Cc1cnc(NCC(F)(F)c2ccccn2)c(=O)n1CC(=O)NCc1ncccc1F	train
NC(=O)C1=CN([C@@H]2O[C@H](COP(=O)(O)OP(=O)(O)OC[C@H]3O[C@@H](n4cnc5c(N)ncnc54)[C@H](OP(=O)(O)O)[C@@H]3O)[C@@H](O)[C@H]2O)C=C[C@H]1C(=O)c1ccncc1	train
C[C@@H]1CC(N)=N[C@H](C[C@@H]2CNC[C@@H]2OCCNCC(F)(F)c2ccccc2)C1	train
Cc1ccc2c(c1)c(-c1nn[nH]n1)c1n2C[C@@](NC(=O)c2ccc(-n3cnnc3)cc2Cl)(c2ccccc2)CC1	train
CC(C)c1ccc([C@@H]2NC(=O)c3cccnc3N2)cc1	train
CN(C)[C@H]1CN([C@H]2CCc3cccc(F)c32)C[C@@H]1c1cn(C)c2ccccc12	train
CN=C1NC(=O)[C@H]([C@H](C)c2c[nH]c3ccccc23)O1	train
Cc1cc(N)nc(CCc2cc(F)cc(CC[C@@H]3CCCN3)c2)c1	train
O=C(O)/C(O)=C/C(=O)[C@]1(Cc2ccc(Cl)cc2)CCCN(S(=O)(=O)Cc2ccccc2)C1	train
CNc1nccc(CN(CC2CCNCC2)S(=O)(=O)c2ccc(S(=O)(=O)N(Cc3ccc(Cl)cc3)C3CCCC3)cc2)n1	train
CCCc1cscc1C[C@H](N=C1NC(C)(C)Cc2cc(Cl)ccc21)C(=O)O	train
Cc1c(S(=O)(=O)c2ccc(=O)[nH]n2)oc2ccc(Cl)cc12	train
CC(C)(C)Nc1nc(C(F)(F)F)nc2ccc(-c3cccc(N)c3)cc12	train
C[C@@H]1Cc2c([nH]c3ccccc23)[C@@](C)(c2c(F)cc(/C=C/C(=O)O)cc2F)N1CC(C)(C)F	train
CNc1cccc2cc(C(=O)Nc3ccc(C(=O)O)cc3)c(=O)[nH]c12	train
O=C(NCC1[C@H]2CN(C(=O)OCc3cc(C(F)(F)F)cc(C(F)(F)F)c3)C[C@@H]12)c1ccc2n[nH]nc2c1	train
[N-]=[N+]=NCCCCCCCCN[C@H]1[C@H](O)[C@H](O)[C@@H](O)[C@H](O)[C@H]1C(=O)O	train
C[N+](C)(C)c1ccc(CNC(=O)c2cc3cc(OCc4ccccc4)ccc3n2Cc2cccc(C(=N)N)c2)cc1	train
CC#CCn1c(N2CCC[C@@H](N)C2)nc2c1c(=O)n(Cc1ccc(C#N)cc1)c1nccn21	train
NS(=O)(=O)c1c(F)c(F)c(Sc2nc3ccccc3s2)c(F)c1F	train
C[C@H]1N=C(N2CCN(C(=O)[C@@H](CC3CCCCC3)NC3CCCCC3)[C@H](C(=O)NCc3cccs3)C2)O[C@H]1c1ccccc1	train
COc1cc(C(=O)N2CCC(N3CCN(C)CC3)CC2)ccc1Nc1ncc2c(n1)N(C1CCCC1)c1ccccc1C(=O)N2C	train
CCCSC[C@H]1N[C@@H](c2c[nH]c3c(N)ncnc23)[C@H](O)[C@@H]1O	train
NC(=O)c1ccc(C(=O)Nc2cc(C3CC3)[nH]n2)cc1	train
NC(=O)c1nnc(N[C@H]2CCCNC2)c2cc(-c3ccc(Cl)cc3)sc12	train
O=P(O)(O)C(O)(Cc1cccc(-c2cccc(-c3ccccc3)c2)c1)P(=O)(O)O	train
O=C(N[C@H](Cc1c[nH]c2ccccc12)C(=O)O)c1nc(Cl)c2ccccc2c1O	train
CCCCCc1cc(OC)c(CC=C(C)C)c(O)c1C(=O)O	train
O=C(O)c1ccccc1Nc1ccccc1C(F)(F)F	train
c1ccc(C[C@H]2CN(c3cc(-c4ccncc4)c(-c4ccc5ccccc5c4)nn3)CCN2)cc1	train
CC(=C/C=C/C(C)=C/C(=O)O)/C=C1\CCCc2cc(C)ccc21	train
COc1ccc(S(=O)(=O)N2Cc3cc(-c4ccc(C=O)o4)ccc3N(Cc3cncn3C)C[C@H]2Cc2ccc(OC(=O)NCc3ccccc3)cc2)cc1	train
CS(=O)(=O)N1CCCCC(=O)N2CCc3cc(ccc32)Nc2ncc(C(F)(F)F)c(n2)NCc2cccnc21	train
Cc1cccc(C)c1OCC(=O)N[C@@H](Cc1ccccc1)[C@@H](O)C[C@H](CC(C)C)NC(=O)c1ccc(N)cc1	train
Cc1nc(N)nc2c1C(=O)C[C@@H](c1ccccc1)C2	train
O=C1Nc2cncc(n2)OCCCCCOc2ccc(Cl)cc2N1	train
O=C1c2ccccc2C(=O)c2c1nnn2-c1cc(F)c(-c2cccc(CO)c2)c(F)c1	train
NCc1cccc(-c2cccc(C(=O)Nc3ccccc3CC(=O)O)c2)c1	train
C[C@H](Nc1cc(Cl)nc2c1cnn2[C@@H]1O[C@H](COP(=O)(O)CP(=O)(O)O)[C@@H](O)[C@H]1O)c1ccc(F)cc1	train
CP(=O)(O)[C@H](C(=O)N/C=C/c1ccc(F)c(F)c1)c1csc2ccc(Cl)cc12	train
CC/C(=C(\c1ccccc1)c1ccc(/C=C/C(=O)O)cc1)c1ccccc1	train
NC(=O)[C@@]1(Cc2ccc(OCc3cc(-c4ccccc4)nc4ccccc34)cc2)C[C@@H]1C(=O)NO	train
N[C@@H](CCP(=O)(O)C[C@@H](CCC(=O)O)C(=O)O)C(=O)O	train
OC[C@H]1O[C@@H](S[C@@H]2O[C@H](CO)[C@H](O)[C@H](n3cc(-c4ccc(F)cc4)nn3)[C@H]2O)[C@H](O)[C@@H](n2cc(-c3ccc(F)cc3)nn2)[C@H]1O	train
C=CCNC1=N[C@@H]2[C@@H](O)[C@H](O)[C@@H](CO)O[C@@H]2S1	train
Nc1ccc(CNC(=O)[C@@H]2CCCN2C(=O)[C@H](N)Cc2ccccc2)cn1	train
CCOC(=O)C=C[C@H](C[C@@H]1CCNC1=O)NC(=O)[C@H](Cc1ccccc1)NC(=O)C(=O)NCC1CCC1	train
O=C(O)c1cc(-c2ccccc2)cc(Cl)c1O	train
C[C@@H]1CC[C@H](C(=O)Nc2ccccc2)CN1c1cc(-c2ccc3c(N)n[nH]c3c2)nc(N)n1	train
O=C(O)COc1cc(F)ccc1C(=S)NCc1ccc(Br)cc1F	train
CC[C@@H](C)c1ccc(O)cc1	train
Cc1cccc(Cl)c1NC(=O)c1cnc(Nc2cccc(C(=O)NC3CC(C)(C)N(O)C(C)(C)C3)c2)s1	train
Cc1oc2cc3oc(=O)c(CCC(=O)N4CCCCC4)c(C)c3cc2c1C	train
CC1(C)CCC(C)(C)c2cc(C(=O)Nc3ccc(C(=O)O)cc3)ccc21	train
Cc1cc2n[nH]c(=O)n2c2ccc(-c3cccc(O)c3)cc12	train
Cc1cn([C@H]2C[C@H](O)[C@@H](COP(=O)(O)OP(=O)(O)OP(=O)(O)OP(=O)(O)OP(=O)(O)OC[C@H]3O[C@@H](n4cnc5c(N)ncnc54)[C@H](O)[C@@H]3O)O2)c(=O)[nH]c1=O	train
CC(C)(O)C1CCC(NC(=O)c2cnc3cc(OC(F)F)ccc3c2)CC1	train
O=C(O)[C@H](CC1CC1)NC(=O)C1(c2ccc(Br)cc2)CCN(Cc2ccccc2C(F)(F)F)CC1	train
CCOc1ccc(C(C)=O)cc1NC(=O)c1cc(NC(C)=O)cc(NC(=O)c2ccco2)c1	train
NC(=O)[C@H](Cc1ccc(C(F)(F)P(=O)(O)O)cc1)NC(=O)[C@H](Cc1ccccc1)NC(=O)Cc1ccc(C(F)(F)P(=O)(O)O)cc1	train
CC(=O)NCCCCOc1ccc(NC(=O)Nc2ccc(S(N)(=O)=O)cc2)cc1	train
O=C(c1ccc2nc(C3CCCCC3)oc2c1)N1CC(N2CCN(c3ncccn3)CC2)C1	train
CN1CCC(N(C)c2nc(N(C)CCC#N)c3ccccc3n2)CC1	train
NS(=O)(=O)c1ccc(NC(=O)Cc2ccccc2)cc1	train
O=C(O)CC[C@H](NCC(=O)[C@@H](O)[C@H](O)[C@H](O)CO)C(=O)O	train
CNc1ncc2c(F)c(-c3c(C)ccc(C(=O)c4c(-c5ccccc5)n(C)n(-c5ccccc5)c4=O)c3N)ccc2n1	train
CCc1nc(N)nc(N)c1-c1ccc(NCc2cc(F)cc(F)c2)cc1	train
NS(=O)(=O)c1ccc(C(=O)NCC(F)(F)C(F)(F)F)cc1	train
N#CC1=C(c2cc(Cl)cc(Cl)c2)C(=O)N2CCC[C@]12Cc1ccc(C#N)cc1	train
CC(C)(O)CNC(=O)c1cc(NC(=O)c2cc(-c3ccccn3)c(Cl)cc2Cl)n(-c2ccccc2)n1	train
CC(=O)N1CCN(c2ccc(CN(CC(C)C)S(=O)(=O)Cc3ccccc3)cc2)CC1	train
CC(=O)N(CCCC[C@H](NC(=O)N[C@@H](CCC(=O)O)C(=O)O)C(=O)O)Cc1ccc(Br)cc1	train
COC(=O)Nc1nc2n(n1)[C@H](c1ccc(C#N)cc1)C(C#N)=C(C)N2c1cccc(C(F)(F)F)c1	train
CCCCCCSC[C@H]1CN(Cc2c[nH]c3c(N)ncnc23)C[C@@H]1O	train
Cc1ccc2c(n1)SCc1cnn(-c3ccc(S(N)(=O)=O)cc3)c1-2	train
Cc1ccc(N)nc1	train
CCn1cnc2c(Nc3cccc(Cl)c3)nc(N[C@@H]3CCCC[C@@H]3N)nc21	train
O=C(Cc1c[nH]c2ccc(Br)cc12)NO	train
Cc1ccccc1CN(c1ccc(C#N)c(Cl)c1)[C@H]1CCN(S(C)(=O)=O)C1	train
O=C(O)c1cccc(C#Cc2ccccc2)c1-n1cccc1	train
CCOC(=O)C(CCNC(=O)OC(C)(C)C)(Cc1ccc(NS(=O)(=O)O)cc1)C(=O)OCC	train
CCN(/C=C/N(C)C)C(=O)CNCc1cc(C(=O)O)ccn1	train
COc1cccc2[nH]c(C(=O)N[C@@H](CC(C)C)C(=O)N[C@@H](C[C@@H]3CCNC3=O)[C@H](O)c3nc4ccccc4s3)cc12	train
CN(C)c1ccc(-c2cc3nccnc3c(NC[C@H]3CCCNC3)n2)cn1	train
CCCCS(=O)(=O)N[C@H](CO)C(=O)N[C@@H](C)C(=O)NCc1ccc(C(=N)N)cc1	train
C[C@H](NC(=O)OCc1ccccc1)C(=O)N[C@@H](C)P(=O)(O)O[C@@H](Cc1ccccc1)C(=O)O	train
CC(C)Oc1ccc(CC[C@@]2(C3CCCC3)CC(O)=CC(=O)O2)cc1F	train
CC[C@@H](NC(=O)N1CC(NOc2ccccc2)=NC[C@@H](Cc2cc(Cl)ccc2OC)C1=O)c1ccc(C(=O)O)c(N)c1	train
CC#CCn1c(N2CCC[C@@H](N)C2)nc2c1c(=O)n(Cc1nc(C)c3ccccc3n1)c1nccn21	train
O=C(Nc1ccc(N2CCCC2=O)cc1)c1cnc(-c2ccccn2)nc1	train
Cc1cc(Cl)c(OCCOc2ccc(C3=C(C(=O)N(Cc4cccc(C)c4C)C4CC4)[C@H]4CNC[C@@H](C3)N4)cc2)c(Cl)c1	train
CC(C)[C@@H]1NC(=O)C/C=C/c2cc3cc(ccc3cn2)[C@@H](C)OC(=O)[C@@H]2CCCN(N2)C(=O)[C@H](C)NC1=O	train
CC[C@H](C)[C@H](NC(C)=O)C(=O)N[C@@H](Cc1ccc(O)cc1)C(=O)N[C@@H](Cc1ccc(O)cc1)P(=O)(O)O	train
N[C@H](Cc1cc(C(=O)O)nn1-c1ccc(CCCF)cc1)C(=O)O	train
O=C(N[C@@H](C(=O)NO)c1ccc(-c2cc(F)c(F)c(F)c2)cc1)[C@@H](F)C(F)(F)F	train
CC(=CC(=O)O)/C=C(\C)C[C@H](C)CCCC[C@@H](O)[C@H](C=O)CO	train
Cc1cc(N)nc(C[C@@H]2CNC[C@@H]2OCCNCC(F)(F)c2ccccc2Cl)c1	train
Nc1nc(Nc2ccc(S(N)(=O)=O)cc2)nn1C(=O)c1c(F)cccc1F	train
O=C(O)[C@H](CCCN1C(=O)N[C@@]2(O[C@H](COP(=O)(O)O)[C@@H](O)[C@H]2O)C1=O)N(O)CO	train
COc1cccc(C2=NC(=O)C(O)=CC2)c1	train
Cn1c2c(c3ccc(Cl)c(Cl)c31)[C@H](C#N)C1(CCNCC1)NC2=O	train
Nc1nc(N)c2cc(CNc3cc(Cl)ccc3Cl)cnc2n1	train
CNCCCc1cc(F)cc(CCc2cc(C)cc(N)n2)c1	train
O=C(NCC1CCCCC1)c1cc(=O)c2ccccc2o1	train
CC[C@H]1[C@@H](O)CC(=O)N1c1ccc(C#N)c(C(F)(F)F)c1	train
C[C@H](C(=O)SCCNC(=O)CCNC(=O)[C@@H](O)C(C)(C)COP(=O)(O)OP(=O)(O)OC[C@H]1O[C@H](n2cnc3c(N)ncnc32)[C@H](O)[C@@H]1OP(=O)(O)O)[C@H]1CC[C@H]2[C@@H]3CCC4=CC(=O)CC[C@]4(C)[C@H]3CC[C@]12C	train
CCN(CCc1cccc(F)c1)Cc1cccc(N=C(N)c2cccs2)c1	train
O=C(O)c1ccc2c(c1)nc(Nc1cccc(C(F)(F)F)c1)c1nc(NC3CC3)ncc12	train
OC[C@H]1O[C@@H](c2ncc(-c3ccc4ccccc4c3)[nH]2)[C@H](O)[C@@H](O)[C@@H]1O	train
C=CCNC(=O)Nc1nc2cc(-c3cccnc3)c(=O)n(CCC(C)C)c2s1	train
O=NC(=O)CNS(=O)(=O)c1ccc(F)cc1	train
O=c1[nH]c(Cl)c(CCCCOP(=O)(O)O)c(=O)[nH]1	train
COc1cccc(C=O)c1OP(=O)(O)O	train
NS(=O)(=O)c1nc2ccccc2[nH]1	train
O=C(c1ccc(Br)s1)[C@H]1CNC[C@@H]1c1ccc2c(=O)[nH]cnc2c1	train
OCN(O)CCCc1ccccc1	train
COc1ccc(-c2cn(C)c(=O)c3cc(C(=O)N4CCN(S(C)(=O)=O)CC4)sc23)cc1OC	train
O=C(O)[C@@H]1C=CC(=O)N1C[C@@H](O)[C@@H](O)[C@H](O)[C@H](O)CO	train
O=P(O)(O)[C@H](F)[C@@H]1O[C@H](CO)[C@@H](O)[C@H](O)[C@H]1O	train
COc1cc(CNC(=O)Cc2cn(CCNc3c4ccccc4nc4cc(Cl)ccc34)nn2)ccc1O	train
C[C@@]1(c2ccc(F)cc2F)C[C@@H](c2cncnc2)SC(N)=N1	train
Nc1nc(N)c2c(-c3ccc(F)cc3)c[nH]c2n1	train
COc1ccc(-c2c(-c3ccc(O)cc3O)n[nH]c2C)cc1	train
OCC1=C[C@H](N[C@H]2C[C@H](CO)[C@@H](O)[C@H](O)[C@H]2O)[C@H](O)[C@@H](O)[C@@H]1O	train
Cc1c(-c2cc(Nc3cc4n(n3)CCN(C)C4)c(=O)[nH]n2)ccc(F)c1NC(=O)c1cc2ccccc2s1	train
CCCCCc1ccc(C(=O)N(Cc2ccc(-c3ccc(CC(=O)OC)cc3)cc2)C2CCN(Cc3ncc[nH]3)CC2)cc1	train
O=C(O)CCC(=O)NCCCCCCOC(=O)c1[nH]c2cc(Cl)ccc2c1-c1c(-c2ccc(F)cc2)ncn1Cc1ccc(Cl)cc1	train
COc1ccc(CCNC(=O)c2ccc(S(N)(=O)=O)cc2)cc1OC	train
CC(C)CN(C[C@@H](O)[C@H](Cc1cc(F)cc(F)c1)NC(=O)O[C@H]1[C@H]2CO[C@H]3OC[C@@H]1[C@H]3C2)S(=O)(=O)c1ccc2nc(NC(C)C)oc2c1	train
COc1ccc2nc(C)c3c(C)nc(-c4cnccc4C)n3c2n1	train
COC(=O)N[C@H](C(=O)N[C@@H](Cc1ccccc1)[C@@H](O)C[C@H](Cc1ccccc1)NC(=O)O[C@H]1CO[C@H]2OCC[C@H]21)C1CC1	train
CNC(=O)[C@H]1Cc2ccc(cc2)NC(=O)[C@@H](NC(=O)c2ccnn2C)Cc2cc(ccc2Cl)Oc2ccc(cc2)C2(CCCC2)CC(=O)N1	train
N#Cc1cnn2c(Nc3ccccc3)nc(NCC3CCCCC3)nc12	train
CS(=O)(=O)NC(=O)c1[nH]c2cc(Cl)ccc2c1CCCOc1cccc2ccccc12	train
O=P(O)(O)OC[C@@H](O)[C@H]1O[C@](O)(CO)[C@@H](O)[C@@H]1O	train
COc1cc2nc(N3CCOCC3)nc(NC3CCN(C)CC3)c2cc1OC	train
Cc1ccc(-n2cc(-c3ccc(S(N)(=O)=O)s3)nn2)cc1	train
CCS(=O)(=O)c1ccc(CC(=O)Nc2cnc(O[C@@H](C)c3ccccc3)c(Cl)c2)cc1	train
C=C[C@@H]1C[C@H]2[C@@H]3CCC4=CC(=O)CCC4=C3[C@@H](c3ccc(-c4cccnc4)cc3)C[C@]2(C)[C@H]1C(=O)C1CC1	train
C[C@H](NC(=O)c1c[nH]c2ncc(Oc3ccccc3)nc12)C1CC1	train
COc1cnc2c(NCc3nnc4ccc(-c5ccccc5)nn34)ccnc2c1	train
CC(C)N1CCN(Cc2ccc(Cn3ccc4ccc(-c5[nH]nc(N)c5C#N)cc43)cc2)CC1	train
CN(NC(=O)CC[C@H](NC(=O)OCc1ccccc1)C(=O)N[C@@H](CCCCN)C(=O)C(=O)NCc1ccccc1)c1ccccc1	train
CCCCCCCCNC(=O)[C@H](Cc1ccc(OCc2ccc3ccccc3n2)cc1)NC(=O)C1CCC(CN)CC1	train
O=C[C@H](CC(=O)O)NC(=O)[C@@H](CCCCNC(=O)c1ccc(Oc2cnc3ccccc3n2)cc1)c1cccs1	train
CC1=C(/C=C/C(C)=C/C=C/C(C)=C/CN)C(C)(C)CCC1	train
NS(=O)(=O)c1ccc(Nc2nc(Cl)nc(NCCO)n2)cc1	train
COc1ccc(-c2nc3ncc(Br)c(NCCCNC(=O)C4(CN)CC4)c3[nH]2)cc1	train
CC(C)c1c(C(=O)N(C)[C@H](C)c2ccccc2)nn(-c2ccc(F)cc2)c1CC[C@@H](O)C[C@@H](O)CC(=O)O	train
O=C(O)[C@@H](Cc1ccccc1)[C@H](Cc1ccc2c(c1)OCO2)C(=O)O	train
CNCCCc1cc(C#N)cc(CCc2cc(C)cc(N)n2)c1	train
CNC(=O)c1c(-c2ccc(F)cc2)oc2cc(N(CC[C@H]3OB(O)c4ccccc43)S(C)(=O)=O)c(C3CC3)cc12	train
NS(=O)(=O)c1nnc(-c2ccccc2Cl)s1	train
CNc1cc(C)nc(Nc2ccc(OC)c(OCCCN3CCCC3)c2)n1	train
CNC(=O)[C@H](Cc1ccccc1)NC(=O)[C@H](CC(C)C)[C@H](CSc1cccs1)C(=O)NO	train
CN(Cc1cccnc1)c1ccc(NC(=O)C2CC2)c(C(=O)O)c1	train
CCNC(=O)/C=C(C)/C=C/C=C(C)/C=C/C1=C(C)CCCC1(C)C	train
Cc1cccc(C(=O)NNS(=O)(=O)c2ccc3ccccc3c2)c1F	train
O=C(O)C(=O)C=C(O)c1ccc2ccccc2c1	train
Cc1ccc(C(=O)N2CCC[C@H]2C(=O)NCc2cc(Cl)ccc2CN)[nH]1	train
CCNc1ncc2cc(-c3ccc(-c4cncc(C)n4)cc3Cl)c(=O)n(CC3CCC(N)CC3)c2n1	train
CN(C)c1cccc(-c2c(F)cc(-n3nnc4c3C(=O)c3ccccc3C4=O)cc2F)c1	train
C/C(=N\N=C(N)N)c1ccc2[nH]c(C(=O)Nc3ccc4cc[nH]c4c3)cc2c1	train
O=C(O)CC[C@H](CP(=O)(O)Cc1ccc(I)cc1)C(=O)O	train
C[C@@]1(c2cc(CNC3(C(F)(F)F)CC3)c(F)cc2F)CCSC(N)=N1	train
Cc1cccc(C)c1OCC(=O)N[C@@H](Cc1ccccc1)[C@@H](O)C[C@H](Cc1ccccc1)NC(=O)O[C@H]1CO[C@H]2OCC[C@H]21	train
CCN(CC)c1ccc(-c2nc3ccccc3c(=O)[nH]2)cc1	train
NC(S)c1nc(N2CCOCC2)nc(N(Cc2cn3ccccc3n2)C2CCCC2)n1	train
O=c1ncn(Cc2ccc(F)cc2F)c2ccc(Oc3ncccc3C(F)(F)F)cc12	train
Cn1cc(CNc2cc(OC[C@H]3C[C@@H]3c3ccccn3)nc3ccnn23)cn1	train
NS(=O)(=O)c1ccc(C(=O)Cn2cnc3ccccc32)cc1	train
CC(C)(C)OC(=O)N1CCC[C@H]1C(=O)N1CCC(C(=O)N[C@H](C(=O)O)C2CCCC2)(c2ccc(Br)cc2)CC1	train
O=c1[nH]c(-c2ccc(-c3nn[nH]n3)cc2)ncc1O	train
O=C(/C=C/c1ccc(Cl)cc1Cl)NO	train
CC(C)C[C@H](NC(=O)[C@@H](O)CC(=O)O)C(=O)NCCCCN=C(N)N	train
COc1ccc(Cn2nnc(O)c2C(=O)Nc2cccc(C(F)(F)F)c2)cc1	train
c1ccc([C@@H]2CCNC3(CCN(c4ncnc5nc[nH]c45)CC3)C2)cc1	train
CC(=O)c1ccc(N2CCN(C(=O)CN3CC[C@@H](C(=O)Nc4ccc(O)c(Cl)c4)C3)CC2)cc1	train
COC(=O)CNc1nc(Cl)nc(Nc2ccc(S(N)(=O)=O)cc2)n1	train
COc1n[nH]c2ncc(-c3cn(-c4c(F)ccc(NS(=O)(=O)c5cccc6ccccc56)c4F)nn3)cc12	train
COc1ccccc1-n1nc2c(c1C(C)C)[C@H](c1ccc(Cl)cc1C)N(c1cc(Cl)ccc1OCCN(C)C)C2=O	train
CCC(CC)O[C@@H]1C=C(P(=O)(O)OCCCCCCN=[N+]=N)C[C@H](N)[C@H]1NC(C)=O	train
O=P(O)(O)C(O)(C[n+]1cccc(-c2ccccc2)c1)P(=O)(O)O	train
CC(C)c1cnc(Nc2ccc(S(N)(=O)=O)cc2)s1	train
N=C(N)c1ccc([C@@H]2Cc3ccccc3B(O)O2)cc1OCc1cccnc1	train
NC(=O)c1nn(CC2CCNCC2)c2c1CCc1cnc(N=C3C=CCC=C3)nc1-2	train
O=C(O)CCNc1cc(Nc2ccc3[nH]c(=O)[nH]c3c2)c(Cl)cc1[N+](=O)[O-]	train
CNCc1cc(OCc2ccc3ccc(N)nc3c2)ccc1Cl	train
CC(=O)N[C@H](C(=O)N[C@@H](Cc1ccccc1)C[C@H](O)[C@H](Cc1ccccc1)NC(=O)[C@@H]1CN(c2cccc(C(C)=O)c2)C(=O)O1)C(C)C	train
NS(=O)(=O)c1ccc(CNC(=O)[c-]2cccc2)cc1	train
Cc1nc2c(N)ncnc2n1[C@@H]1O[C@H](CN(C)CCC(N)=O)[C@@H](O)[C@H]1O	train
COc1ccc(Cn2c(=O)n3ncnc3c3c4c(sc32)CN(C(=O)[C@@H]2CC2(F)F)CC4)cc1	train
CN1Cc2nccc(-c3cn(C)nc3-c3ccc(F)cc3)c2C1=O	train
O=C(O)[C@]1(O)C=C(c2cccc(Sc3ccccc3)c2)[C@@H](O)[C@H](O)C1	train
Oc1cccc2[nH]c(CCc3cccc(Cl)c3)nc12	train
Cc1cc(Cl)ccc1OCc1nc2ccc(F)cc2n1[C@H](C(=O)NC1CCCCC1)C1CCCCC1	train
O=[N+]([O-])c1cc(O)c(O)c([N+](=O)[O-])c1	train
N#Cc1c(/C=C/c2ccccc2)[nH]c2nc(N)[nH]c(=O)c12	train
CCc1cncnc1N1CCN(Cc2nc3ccc(C(F)(F)F)cc3[nH]2)CC1	train
N[C@]1(C(=O)O)[C@@H](CCC[B-](O)(O)O)C[C@H]2NCC[C@H]21	train
COc1cc2c(cc1OC)[C@H](Cc1c[nH]c3ccccc13)N(C=O)CC2	train
CCCn1cnc2c1CC[C@@](CCCN)(C(=O)O)C2	train
CNc1ncnc2c1ncn2[C@@H]1O[C@H](/C=C/CNC(=O)c2cc(-c3ccc(F)cc3)cc(O)c2O)[C@@H](O)[C@H]1O	train
CC1CCN(c2ccc(CO)cc2NC(=O)c2ccc(C#N)o2)CC1	train
Nc1ncnc2c1ncn2[C@@H]1O[C@H](C(=O)NCCCCCC(=O)N[C@H](CC(=O)O)C(=O)O)[C@@H](O)[C@H]1O	train
NS(=O)(=O)c1c(F)c(F)c(SCCO)c(F)c1NC1CCCCCCC1	train
CN1C(=O)[C@@](c2ccc(OC(F)(F)F)cc2)(c2ccc(F)c(-c3cncnc3)c2)N=C1N	train
CC(C)[C@H](NC(=O)[C@H](Cc1ccccc1)NC(=O)OCc1ccccc1)P(=O)(O)C[C@H](C(=O)O)c1cccc(N=C(N)N)c1	train
NCCNC(=O)c1cncc(-c2cnc(Nc3cc(N4CCOCC4)ccn3)s2)c1	train
COc1cc(F)cc2c1nc(C)c1c(C)nc(-c3ccncc3C)n12	train
O=C[C@H](CSCc1ccccc1)NC(=O)[C@H](Cc1ccccc1)NC(=O)N1CCOCC1	train
OCc1cnn2c(NCc3cccnc3)cc(-c3ccccc3)nc12	train
O=C(NCc1cccc(-c2cccc(-c3cc4cnccc4[nH]3)c2O)c1)Nc1ccccc1	train
COc1cccc(-c2c(F)cc(-n3nnc4c3C(=O)c3ccccc3C4=O)cc2F)c1	train
CNC(=O)C[C@@H]1[C@H](O)[C@H](O)[C@@H](CO)N1CCCc1ccc(F)cc1	train
CC[C@@H]1C=C[C@H]2CCN(C(=O)[C@@H]3CC[C@H]4C=C[C@]5(CCCN5C(=O)[C@H](Cc5ccccc5Cl)NC(C)=O)C(=O)N43)[C@@H]2C(=O)N1CC(=O)O	train
Cc1cc[nH]c1	train
Nc1nc(Nc2ccc(S(N)(=O)=O)cc2)sc1C(=O)c1cccc(F)c1	train
NC(=O)c1nn(CC(=O)N2[C@@H]3C[C@@H]3C[C@H]2C(=O)Nc2cccc(Br)n2)c2ccccc12	train
c1ccc(-c2nc(-n3cnnc3)c3ccccc3n2)cc1	train
CC(C)(COP(=O)(O)O)[C@@H](O)C(=O)NCCC(=O)NCc1ccc2c(c1)OCO2	train
O=C(NCCN1CCOCC1)c1ccc2c(c1)C(=O)c1ccc(Nc3ccc(F)c(NC(=O)c4ccccc4)c3)cc1OC2	train
N=c1nnc(=N)c1=NNc1cccc(C(F)(F)F)c1	train
COc1cccc(-c2cccc([C@]3(C)CC(=O)N(C)C(N)=N3)c2)c1	train
NS(=O)(=O)c1nnc(NC(=O)C23CC4CC(CC(C4)C2)C3)s1	train
OC[C@H]1O[C@@H](c2ncc(-c3ccccc3)[nH]2)[C@H](O)[C@@H](O)[C@@H]1O	train
CCc1[nH]c2nc(Sc3cncnc3)nc(N3C[C@@H]4C(N)[C@@H]4C3)c2c1Cl	train
Nc1nc(N)c(-c2cccc(Cl)c2)c(CCCOc2ccccc2)n1	train
CCc1cccc(NC(=O)c2cc3cccc(O)c3oc2=N)c1	train
CO[P@@](=O)(Nc1nn(-c2ccc(-c3cc4nc(C)cc(N)n4n3)cc2)cc1C(=O)O)c1ccc(C)cc1C	train
CC(C)SC(=N)N	train
COc1cccc(COC(=O)c2oc3cccc(OC4CCNCC4)c3c2C)c1	train
NS(=O)(=O)c1ccc(C(=O)N2CCc3cc(O)c(O)cc3[C@H]2c2ccccc2)cc1	train
Nc1ncnc2c1ncn2[C@@H]1O[C@H](COP(=O)(O)OC(=O)c2cccc(-c3noc(-c4ccccc4F)n3)c2)[C@@H](O)[C@H]1O	train
NC(=O)c1ncc(N[C@H]2CCCNC2)c2nc(-c3ccc(Cl)cc3)cn12	train
CC(C)n1c(Nc2ccccc2F)nc2cnc(Oc3c(F)cccc3F)nc21	train
CN(C)CCNC(=O)NC[C@H]1CC[C@@H]2[C@H](O1)c1cc(C(F)(F)F)ccc1N[C@H]2c1ccccc1	train
NCc1ccc(C(=O)N[C@H]2Cc3cccc(C(=O)O)c3O[B-]2(O)O)cc1	train
COc1cn(-c2ccc3c(c2F)C(C)(C)C(=O)N3CC2CC2)nc(-c2ccnn2-c2ccccc2)c1=O	train
COc1cc2c(cc1NS(=O)(=O)c1ccc(C#N)cc1)c(C)cc(=O)n2C	train
Cc1cn(C[C@H](N)C(=O)O)c(=O)n(Cc2cc(-c3ccccc3)sc2C(=O)O)c1=O	train
CCNC(=O)COc1ccc(Cl)cc1CNC(=O)[C@@H]1CCCN1C(=O)[C@H](N)C1CCCCC1	train
COc1ccc(-c2cccc3nc(Nc4ccc(N5CCN(C)CC5)cc4)nn23)cc1	train
Cc1cn(C[C@H](N)C(=O)O)c(=O)n(Cc2c(C(=O)O)sc(Br)c2Br)c1=O	train
Oc1cc(O)cc(Oc2ccc(Cl)c(Cl)c2)c1	train
COc1ccccc1-c1ccc(NC(=O)/C(C#N)=C(/C)O)c(Cl)c1	train
O=C(N[C@@H](C(=O)NO)c1ccc(-c2cc(F)c(F)c(F)c2)cc1)C1CCCC1	train
O=C1NC(=Nc2ccccc2)N=C1Cc1ccc2c(c1)OCO2	train
COc1ncnc(NCc2ccc(S(N)(=O)=O)cc2)c1[N+](=O)[O-]	train
CC[C@H](NC)C(=O)N[C@H](C(=O)N1C[C@@H]2Cc3ccccc3N2C[C@H]1C(=O)N[C@@H]1CCOc2ccccc21)C1CCCCC1	train
Cc1nc(C(F)(F)F)c(C(=O)O)cc1-c1nc(-c2ccccc2)cs1	train
O=C(Nc1cccc(-c2nn[nH]n2)c1)c1cc(-c2nn[nH]n2)cc(C(F)(F)F)c1	train
Cc1ccc(-c2c[nH]c3nc(N)nc(N)c23)cc1	train
O=C(Cn1c(Cl)cnc(NCC(F)(F)c2cccc[n+]2[O-])c1=O)NCc1ccccc1F	train
CCCCCCCCCCCCCC(=O)CSCCNC(=O)CCNC(=O)[C@H](O)C(C)(C)COP(=O)([O-])OP(=O)([O-])OC[C@H]1O[C@@H](n2cnc3c(N)ncnc32)[C@H](O)[C@@H]1OP(=O)([O-])[O-]	train
CC(C)[C@H](NC(=O)OCc1ccccc1)P(=O)(O)O[C@H](C(=O)O)c1cccc(N=C(N)N)c1	train
CC(C)N1C(=O)C(NC2CCN(c3ncc(CC(=O)O)cc3Cl)CC2)=C(c2ccccc2)S1(=O)=O	train
CCc1nc(N)nc(N)c1C#C[C@@H](C)c1cc(OC)cc(-c2cccc3cnccc23)c1	train
O=c1[nH]nc2cc(CO)c3ccc(-c4ccc[nH]4)cc3n12	train
CS(=O)(=O)c1ccc([C@@H](CCNC(=O)c2ccc(C#N)cc2)c2ccc(F)cc2)cc1	train
CN1CCN=C1c1cccc(Oc2nc(Oc3cc(C(=N)N)ccc3O)c(F)c(N(C)CC(=O)O)c2F)c1	train
N[C@H](Cc1ccccc1)C(=O)N1CCC[C@H]1C(=O)NCc1cc(Cl)ccc1Cl	train
CCc1c(C(=O)Nc2cc(S(=O)(=O)N(CC)CC)ccc2O)[nH]c(C)c1C(C)=O	train
NC(=O)c1ccc(N[C@@H]2CC[C@H](c3ccccc3)C2)nc1	train
CCC1=C[C@@H]2Cc3c(c(N)c4ccc(Cl)cc4[n+]3C)[C@H](C1)C2	train
CC1(N)CCN(c2cnc(-c3cccc(Cl)c3Cl)c(N)n2)CC1	train
O=C(NO)c1ccc(CN(Cc2nnnn2Cc2ccccc2)C(=O)c2ccccc2C(F)(F)F)cc1	train
N=C(N)c1ccc2cc(C#Cc3ccc4c(c3)CCNC4)ccc2c1	train
Cc1ccc(C(=O)Nc2cccc(C(F)(F)F)c2)cc1Nc1nc(-c2cccnc2)nc2c1cnn2C	train
O=S(=O)(O)OC1C(OS(=O)(=O)O)C(OS(=O)(=O)O)C(OS(=O)(=O)O)C(OS(=O)(=O)O)C1OS(=O)(=O)O	train
COc1cc2ncnc(N[C@H](C)c3cccc4ccccc34)c2cc1OC	train
N=C(N)c1ccc2cc(C(=O)Nc3ccccc3)ccc2c1	train
COC(=O)[C@@]1(O)C[C@H]2O[C@]1(C)n1c3ccccc3c3c4c(c5c6ccccc6n2c5c31)C(=O)NC4	train
C[C@]12CCc3c(ccc4cc(O)ccc34)[C@@H]1CCC2=O	train
C/C(=C\Cc1c(O)c(Cl)c(C)c(C=O)c1O)CC/C=C(\C)[C@H](C)O	train
COCCCNC(=O)c1cc(S(N)(=O)=O)cnc1Sc1ccccc1	train
O=C(Nc1ccccn1)Nc1cccc2c1[C@H]1CCCN1C2=O	train
CN(C)c1nc2c(Br)c(Br)c(Br)c(Br)c2[nH]1	train
Cn1ncc(NC(=O)c2nc(-c3c(F)cccc3F)sc2N)c1N1CC[C@@H](N)[C@H](F)CC1	train
COc1ccc(NC(=S)NCCCn2ccnc2)cc1OC	train
C=C[C@@H]1C[C@]1(NC(=O)[C@@H]1C[C@@H](Oc2nc3cc(OC)ccc3nc2C)CN1C(=O)[C@@H](NC(=O)OC1CCCC1)C(C)(C)C)C(=O)NS(=O)(=O)C1(C)CC1	train
NC(=O)c1cccc2c(O)c(Cc3ccc(C(=O)N4CCN(c5ncccn5)CC4)cc3)oc12	train
NS(=O)(=O)Oc1ccc(NC(=O)Nc2ccc(Cl)c(C(F)(F)F)c2)cc1	train
O=C(NCCCNc1nc(Nc2cccc(NC(=O)N3CCCC3)c2)ncc1I)c1cccs1	train
C=CCCOc1ncc(C(=C)O)cc1-c1nc2c(CC)[n+](C3CN(CC)C3)[nH]c2c(=O)[nH]1	train
CC(C)Oc1ccc(-c2nc3ccccc3c(=O)[nH]2)cc1	train
c1ccc([C@H]2COCCN2c2ccnc3[nH]ncc23)cc1	train
Cc1ccc(Cl)cc1NC(=O)[C@H]1CC(=O)N(C2CCCCC2)C1	train
CCCNC(=O)C1(c2ccc(NC(=O)c3cccc(Cl)c3)cc2)CCC1	train
O=C(NO)c1cnc(NCc2cc(C(F)(F)F)cc(C(F)(F)F)c2)[nH]c1=O	train
CNCCN(C)c1cc(C#N)cc(CCc2cc(C)cc(N)n2)c1	train
CC[C@H](C)CN(C[C@@H](O)[C@H](Cc1ccccc1)NC(=O)OCCN1CCNC1=O)S(=O)(=O)c1ccc(OC)cc1	train
C[C@@H](NC(=O)Cc1c(Cl)ccc(=NCC(F)(F)c2cccc[n+]2[O-])n1O)c1cccc(Cl)c1	train
Cc1nnc2n1-c1ccccc1C(c1ccccc1)=N[C@H]2NC(=O)OCc1ccccc1	train
O=C(NS(=O)(=O)c1ccc(N[C@H](CCN2CCOCC2)CSc2ccccc2)c(S(=O)(=O)C(F)(F)F)c1)c1csc(N2CCc3cccc(C(=O)Nc4nc5ccccc5s4)c3C2)n1	train
O=C(O)CC[C@H](NC(=O)N[C@@H](CCCC(=O)NCc1ccc(F)cc1)C(=O)O)C(=O)O	train
N=C(N)c1ccc(CNC(=O)[C@@H]2CCCN2C(=O)[C@H](N)C(c2ccccc2)c2ccccc2)cc1	train
C[C@H]1CCC[C@H](O)CCC/C=C/c2cc(O)cc(O)c2C(=O)O1	train
O=c1c(-c2ccc(O)c(O)c2)coc2cc(O)ccc12	train
O=C(O)c1cc(-c2ccc(CN3CCc4cc(-c5ccc(C(=O)O)o5)ccc4C3=S)cc2)n(-c2ccc(Cl)c(Cl)c2)n1	train
CC(C)(C)OC(=O)Nc1cccn([C@@H](CC2CC2)C(=O)N[C@@H](C[C@@H]2CCNC2=O)[C@@H](O)C(=O)NCc2ccccc2)c1=O	train
COc1ccc(Cn2c(=O)n3ncnc3c3c4c(sc32)CN(CC2CCOCC2)CC4)cc1	train
CCS(=O)(=O)Nc1ccc(Oc2ccccc2)c(-c2[nH]c(C)c3c(=O)[nH]ncc23)c1	train
CC(C)(O)c1ccc(-c2nc3c(F)cc(F)cc3c(=O)[nH]2)cc1	train
Fc1cccc(CCNCCNc2ccnc(-n3ccnc3)n2)c1	train
O=C([C@@H]1C=Cc2c(Cl)nc(OCc3ccc(F)cc3)c(=O)n21)N1CCCC1	train
CC1(C)CC(=O)Nc2cc(NC(=O)c3cc(-c4ccc5nc(N)ncc5c4)ccc3F)ccc21	train
[O-][n+]1cccc(C[C@@H](c2ccc(OC(F)F)c(OC3CC3)c2)c2ncc(C(O)(C(F)(F)F)C(F)(F)F)s2)c1	train
CC(C)[C@H]1SC(=Nc2ccccc2F)NC1=O	train
CC(C)(C)n1nc(-c2cccc(O)c2)c2c(N)ncnc21	train
O=C(O)c1cccc(Oc2cccc3nc(-c4cn(-c5ccc(O)c(F)c5)nn4)ccc23)c1	train
c1cc2c([nH]1)CCCC2	train
C[C@H](NC(=O)[C@H](CC(=O)NCC(C)(C)C)NC(=O)c1ccc(C(=O)NO)cc1)C(=O)NCc1ccccc1	train
O=C1NCCn2cc(-c3ccnc(NC4CCOCC4)n3)cc21	train
COc1cc(Nc2nc3cccc(-c4c(F)cccc4OC)c3o2)cc(OC)c1OC	train
C[C@H]1OC(c2cccc(O)c2O)=N[C@@H]1C(=O)NCCCN(CCCNC(=O)c1cccc(O)c1O)C(=O)[C@H]1N=C(c2cccc(O)c2O)O[C@@H]1C	train
CCN1CCN2CCS(=O)(=O)N(C)c3cc(C(=O)N[C@@H](Cc4ccccc4)[C@H](O)CNCc4cccc(OC)c4)cc1c32	train
CN1CCC[C@@H](Nc2cnn(C)c(=O)c2Cl)C1	train
CC(C)CN(C[C@@H](O)[C@H](Cc1ccccc1)NC(=O)c1cccc(O)c1)S(=O)(=O)c1ccc2ncsc2c1	train
N#Cc1cccc(CNCCc2ccnc(-n3ccnc3)n2)c1	train
NS(=O)(=O)Cc1ccc(-c2nc3ccccc3c(=O)[nH]2)cc1	train
COCCN1CCc2[nH]c(-c3ccnc(NC4CCOCC4)n3)cc2C1=O	train
CC(C)(C)[C@H]1CC[C@@H](C(=O)N2CCC[C@H]2[C@@H](O)CO)N1C(=O)CCCc1ccccc1	train
CNC(=O)c1ccc2nc(C)c3nnc(-c4ccccc4Cl)n3c2c1	train
OC[C@@H]1[C@@H](O)[C@H](O)[C@H](O)c2nccn21	train
C=Cc1nc2c(N)ncnc2n1[C@@H]1O[C@H](CN(C)CCCCON)[C@@H](O)[C@H]1O	train
CN1CCN(c2ccc(-c3cnc4[nH]c5cnc(C#N)cc5c4c3)cc2)CC1	train
Cc1ccc(C(=O)NC2CC2)cc1NC(=O)c1ccc(-c2ccccc2Cl)s1	train
Cc1nc(-c2ccccn2)nc(NCCNc2ccc(C(F)(F)F)cn2)c1Cl	train
N[P@]1(=O)C=CNC(=O)N1	train
CSC[C@H]1CN(Cc2c[nH]c3c(N)ncnc23)C[C@@H]1O	train
COc1ccc2c(c1O)C(=O)c1c3c(cc(O)c1C2=O)[C@@]12O[C@@]1([C@@H](C)O)[C@H](C#C/C=C\C#C[C@H]2O)N3	train
CC(C)(C)OC(=O)N[C@@H](Cc1ccccc1)[C@@H](O)CN[C@@H](Cc1ccccc1)C(=O)N[C@@H](CCC(=O)O)C(=O)N[C@@H](Cc1ccccc1)C(N)=O	train
CC(=O)/C(=C/c1cccs1)C(=O)Nc1ccc(S(N)(=O)=O)cc1	train
CNC(=O)c1cccc(S(=O)(=O)N2CCc3ccccc3C2)c1	train
CCCCn1c(-c2ccccc2C)cn2c3c(=O)[nH]c(=O)n(C)c3nc12	train
C[C@H](CCCC(C)(C)O)[C@H]1CC[C@H]2[C@@H]3CC=C4C[C@@H](O)CC[C@]4(C)[C@H]3CC[C@]12C	train
NC(=O)Nc1sc(-c2ccccc2)cc1C(=O)N[C@H]1CCCNC1	train
NS(=O)(=O)c1ccc(N[C@@H]2O[C@H](CO)[C@@H](O)[C@H](O)[C@H]2O)cc1	train
Cc1ccncc1-c1cccc2c(N)c(C(N)=O)nnc12	train
O=C(O)c1cccc([C@H]2CCC[C@@H]2c2nc3c(O)cccc3[nH]2)c1	train
C=C1CCCC2=NC[C@H](C)[C@@H](C)C[C@@]23CCC(C(=O)O)=C[C@@H]3[C@@H]2O[C@]3(C[C@H]4CCC[C@@]5(CC[C@@]6(O[C@@H](CC[C@@]6(C)O)C1)O5)O4)C[C@@H](C)[C@@H](O)[C@H]2O3	train
O=C1OCc2c(Cl)c(Cl)c(Cl)c(Cl)c21	train
Cc1cn(-c2cc3c(c(C4CCCC4)c2)C(=O)NCC3)c2c1C(=O)CC(C)(C)C2	train
O=C(O)c1csc(-n2[nH]c(-c3ccc(F)c(F)c3)cc2=O)n1	train
COc1ccc(-c2c(-c3ccnc(NC(C)=O)c3)[nH]c3cccnc23)nc1	train
Cc1ncc(C(=O)Nc2cc(Cl)cc(CN3CCN(C(=O)C4CCCC4)[C@@H](C)C3)c2C)cn1	train
Nc1nccn2c([C@@H]3CC[C@H]4COC(=O)N4C3)nc(-c3ccc(C(=O)Nc4cc(C(F)(F)F)ccn4)cc3)c12	train
COc1ccc(-c2[nH]c3nc(N)[nH]c(=O)c3c2C#N)cc1	train
CN[C@@H](C)C(=O)N[C@H]1CN(C(=O)c2ccc(N)cc2)c2ccccc2N(Cc2c(OC)ccc3ccccc23)C1=O	train
CCN1/C(=C/C(C)=O)Sc2ccc(OC)cc21	train
CCOc1ccccc1-c1nc(-c2ccncc2)no1	train
O=C[C@H](O)CO	train
Cc1sc2c(c1Cc1ccccc1)COCc1nnc(C)n1-2	train
COc1cccc(N2C[C@H]3C(=O)N(C)C(N)=N[C@@]3(c3cc(-c4cccc(C#N)c4)cs3)C2)n1	train
O=C(O)C(=O)CC(=O)c1ccccc1Br	train
C=C1[C@H](O)CC(=C/C=C2\CCC[C@]3(C)[C@@H]([C@H](C)CCC[C@H](OC)c4ccc(O)cc4)CC[C@@H]23)C[C@H]1O	train
COc1cc2c(cc1-c1c(C)noc1C)[nH]c1nc(C)nc(Nc3cc(C4CC4)nn3C)c12	train
Nc1ncnc2c1ncn2[C@H]1CNC[C@@H](COS(=O)(=O)NC(=O)CCCC[C@@H]2SC[C@@H]3NC(=O)N[C@@H]32)O1	train
O=C(O)Cc1c[n+]2c([nH]1)[C@H](O)[C@@H](O)[C@H](O)[C@H]2CO	train
COc1cccc(Nc2cc(-c3ccccc3)nc3c2C(=O)NCC3)c1	train
Cc1[nH][n+](C2CCN(CC(=O)N(C)C)CC2)c(C)c1Nc1ncc(Cl)c(-c2cnn3ccccc23)n1	train
CNC(=O)c1ccc2nc(C)c3nnc(-c4cc(OCC(C)C)ccc4Cl)n3c2c1	train
OCc1csc(-c2ccnc3[nH]ccc23)n1	train
Cc1nn(C2CC2)c2c1[C@@H](c1ccc(Cl)cc1)N(c1cc(C)c(=O)n(C)c1)C2=O	train
Nc1nc(NC2CCCCC2)sc1C(=O)c1cccnc1	train
O=C(O)C[C@H]([S-])C(=O)O	train
Cc1c(F)c(Oc2cccc(C(=N)N)c2)nc(Oc2cccc(C(=N)N)c2)c1F	train
O=C(CN1CCN(C(=O)c2ccco2)CC1)Nc1cc(C(F)(F)F)ccc1Cl	train
O=c1cc(N2CCc3[nH]nc(-c4ccncc4)c3C2)cc[nH]1	train
CN(C)Cc1nccn1-c1ccc(NC(=O)c2cc(C(F)(F)F)nn2-c2ccc3onc(N)c3c2)c(F)c1	train
CCC(=O)Nc1cccc(Oc2nc(Nc3cnn(C)c3)nc3[nH]ccc23)c1	train
NS(=O)(=O)c1c(F)c(F)c(SCCO)c(F)c1N[C@H]1CCc2ccccc21	train
O=c1c2cc(CS(=O)(=O)NCc3ccccn3)ccc2ccc2ncc(-c3cnn(C4CCNCC4)c3)cc12	train
CN1C(=O)N(c2cc(Cl)cc(Cl)c2)C(=O)[C@]12CN(Cc1cc(C(=O)O)cs1)C[C@H]2c1ccc(C#N)cc1	train
COc1ccc2ccc(C(=N)N)cc2c1OCC(N)=O	train
CN1CCC(C#N)(NC(=O)[C@H](CC2CCCCC2)NC(=O)N2CCOCC2)CC1	train
CN1CCN(c2ccc(-c3cnc4ccccc4c3)cc2NC(=O)c2c[nH]c(=O)cc2C(F)(F)F)CC1	train
CN(C)CCCC(=O)Nc1cccc([C@H](OCCN2CCCCC2)c2cc3nccc(C(=O)O)c3s2)c1	train
O=C(N[C@@H](CCCCNC(=O)c1c(O)cccc1F)c1ncc(-c2ccc3ccccc3c2)[nH]1)c1cncs1	train
O=C(O)C1CCC(COc2ccccc2Sc2ccc(/C=C/C(=O)N3CCOCC3)c(C(F)(F)F)c2C(F)(F)F)CC1	train
NS(=O)(=O)c1ccc(-c2ccccc2)cc1	train
CCc1cc(O)c(Oc2ccc([N+](=O)[O-])cc2Cl)cc1F	train
CC[C@@H]1C(=O)N(C)c2cnc(N(C)c3ccc(C(=O)NC4CCN(C)CC4)cc3OC)nc2N1C1CCCC1	train
COc1c(C)cc([C@@]2(c3cccc(-c4cncnc4)c3)N=C(C)C(N)=N2)cc1C	train
CC(C)NC[C@@H](O)COc1ccc(C(=O)NCCc2ccc(S(N)(=O)=O)cc2)cc1	train
CC(C)[C@@H]1NC(=O)C(C)(C)/C=C/c2ccc3ccc(nc3c2)[C@@H](C)OC(=O)[C@@H]2CCCN(N2)C(=O)[C@H](C)NC1=O	train
O=C(Nc1cnccc1O[C@H]1CCNC1)c1csc(-c2c(F)cccc2F)n1	train
O=C(O)c1ccc(-c2cc3cccnc3c(-c3cccc([N+](=O)[O-])c3)n2)cc1	train
C=CCOc1cccc2c1-c1c(c3c(n1C(C)C)CCCC3=O)C2=O	train
CC(C)=CCC/C(C)=C\C#N	train
O=P(O)(O)OC[C@H]1O[C@@](CO)(OP(=O)(O)O)[C@@H](O)[C@@H]1O	train
NC1CCC(S(=O)(=O)N2[C@@H]3CC[C@H]2CC(NC(=O)c2cc(C4CC4)on2)C3)CC1	train
C=CC(=O)Nc1ccc2ncn(-c3cncc(Nc4ccccc4)n3)c2c1	train
O=C(NCc1cccs1)[C@H](O)[C@@H](O)C(=O)N1CCC[C@@H]1c1ccccc1	train
COc1cc(C#Cc2[nH]nc3c2Cc2cc(OC)c(OC)cc2-3)ccc1O	train
O=C(Nc1ccc(S(=O)(=O)c2ccccc2)cc1)[C@H]1C[C@@H]1c1cccnc1	train
N=CC1(NC(=O)[C@@H]2C[C@@H](S(=O)(=O)c3ccccc3Cl)CN2C(=O)C2(c3ccc(Cl)cc3)CC2)CC1	train
Cc1cc(Nc2cc(F)c(C(F)(F)F)c(F)c2)n2nc(C(F)(F)F)nc2n1	train
Cc1cc(C)nc(SCC(=O)c2ccc(S(N)(=O)=O)cc2)n1	train
COc1ccc(S(=O)(=O)Nc2ccc(NS(=O)(=O)c3ccc(OC)cc3)c3ccccc23)cc1	train
CCC[C@@H](CC(=O)O)n1c(=O)n(Cc2cc(Br)cc3c2CC(=O)N3)c2ccccc21	train
COC[C@H]1CCCN1C(=O)c1cc(C)cc(C(=O)N[C@@H](Cc2cc(F)cc(F)c2)[C@H](O)[C@H]2C[C@@H](Oc3ccccc3)CN2)c1	train
C[C@@H]1CC(=O)Nc2cccc(-c3ccc4c(c3)c(C3CC3)nn4C)c2N1	train
N[C@@H](Cn1cc(Cl)c(=O)[nH]c1=O)C(=O)O	train
C=CCO[C@@H]1O[C@@H]([C@H](O)CO)[C@H](O)[C@H]1O	train
CC(C)Nc1nc(N)c(C(=O)c2cccnc2)s1	train
C[C@]12CC[C@@H]3c4ccc(O)cc4CC[C@H]3[C@@H]1CC[C@@]2(O)/C=C/c1ccccc1C(F)(F)F	train
CCCCCCCCCCCCCCCCCCCCCCCC(=O)N[C@@H](CO[C@H]1O[C@H](CO)[C@H](O)[C@H](O)[C@H]1O)[C@H](O)[C@H](O)CCCCC	train
NS(=O)(=O)C[C@H]1COc2cc(F)ccc2N1C(=O)c1ccc2c(c1)NC(=O)CO2	train
O=C(NO)c1ccc(-c2cccc3ccccc23)cc1	train
C[C@]1(c2cc(NC(=O)c3ccc(C#N)cn3)ccc2F)N=C(N)OC[C@@H]1F	train
CCN(CC)c1ccc2c(COC(=O)N[C@H](C(=O)N[C@@H](Cc3ccccc3)C[C@H](O)[C@H](Cc3ccccc3)NC(=O)OCc3cncs3)C(C)C)cc(=O)oc2c1	train
CC(C)(C)NC(=O)N1CCN(C(=O)N[C@H](C(=O)O)[C@H](C=O)CCCN=C(N)N)CC1	train
O=C(NCc1cc(F)cc(Cl)c1)[C@@]1(O)CCN(c2ccccc2)C1=O	train
COc1cnc(COc2ccc(F)c(F)c2)cc1-c1cc2c([nH]1)CCNC2=O	train
Cn1c(=O)n(CCC(C)(C)O)c2cc(Nc3ccnc(Cl)c3C#N)ccc21	train
O=C1C[C@H]2CC[C@@H](C1)N2CCc1ccc(C(F)(F)F)cc1	train
C[C@H](CO)Nc1nc(Nc2ccc(S(N)(=O)=O)cc2)ncc1Br	train
O=C(O)c1ccc(-c2ccccc2OC(F)(F)F)o1	train
Cc1cc(CCNCc2ccc3ccc(N)nc3c2)ccc1C#N	train
C[C@@H](C(=O)N(C)C)N(CC(F)(F)F)c1ccc(C#N)c(C(F)(F)F)c1	train
NC(N)=NCCC[C@@H]1NC(=O)[C@@H]2CCCN2C(=O)[C@@H](NC=O)CNC(=O)/C=C/[C@H](Cc2ccc(O)cc2)NC(=O)[C@@H](Cc2ccccc2)NC(=O)C1=O	train
CCOc1ccccc1O	train
CN1CC/C=C/[C@H](O)[C@@H]2CC[C@H]2CN2C[C@@]3(CCCc4cc(Cl)ccc43)COc3ccc(cc32)[C@@](O)(C(=O)O)CC1=O	train
C[C@]1(CC(=O)O)C[C@H](c2cccc(Cl)c2)[C@@H](c2ccc(Cl)cc2)N([C@H](CS(=O)(=O)N2CCCC2)C2CC2)C1=O	train
CCCOc1cc(Cl)cc(-c2cc(-c3ccccc3C#N)cn(-c3cccnc3)c2=O)c1	train
C/C=C/Cn1cc(-c2cccc(C(=O)N(C)C)c2)c2cc[nH]c2c1=O	train
Cc1cccc2scc(Cn3c(=O)n(CCCC(=O)O)c4ccccc43)c12	train
[truncated: 1,817 more rows]

## Sheet: Dataset_5
SMILES of 1,615 FDA-approved drugs
[truncated: 1,616 more rows]
