# Supplementary material
Source: Research Square preprint supplement (doi:10.21203/rs.3.rs-9338412/v1)
Supplement: Supplementary file 5 [file fa7803e31d38b1bb2c4fb5c9.pdf]

## Supplementary information

### Structure-based discovery of small molecules that allosterically modulate RNA function

Zhiling Pan<sup>1,2,†</sup>, Hao Wu<sup>3,4,†</sup>, Han Hu<sup>5,†</sup>, Jian Zou<sup>2,†</sup>, Haiyun Ma<sup>2,†</sup>, Hongshan Ni<sup>6,†</sup>, Liu Wang<sup>7</sup>,  
Jiaqi Zhao<sup>5</sup>, Xiaoqi Sun,<sup>8,9</sup> Jiayu Dong<sup>8</sup>, Sheng Xu<sup>3,4</sup>, Yu Cheng<sup>10</sup>, Ling Liu<sup>8,\*</sup>, Ke Zheng<sup>6,\*</sup>,  
Siqi Sun<sup>3,4,\*</sup>, Zhaoming Su<sup>2,\*</sup>

<sup>1</sup>School of Pharmacy, Chengdu University, Chengdu, 610051, China.

<sup>2</sup>State Key Laboratory of Biotherapy, West China Hospital, Sichuan University, Chengdu, 610044, China.

<sup>3</sup>Research Institute of Intelligent Complex Systems, Fudan University, Shanghai, 200437, China.

<sup>4</sup>Shanghai Artificial Intelligence Laboratory, Shanghai, 200030, China.

<sup>5</sup>Mingle Scope (Chengdu), 138 2<sup>nd</sup> Tianfu Street, Chengdu, 610096, China.

<sup>6</sup>Key Laboratory of Green Chemistry & Technology, Ministry of Education, College of Chemistry, Sichuan University, Chengdu 610064, China.

<sup>7</sup>State Key Laboratory of Oral Diseases, National Clinical Research Center for Oral Diseases, National Center for Stomatology, Department of Cariology and Endodontics, West China Hospital of Stomatology, Sichuan University, Chengdu, 610044, China.

<sup>8</sup>State Key Laboratory of Microbial Diversity and Innovative Utilization, Institute of Microbiology, Chinese Academy of Sciences, University of Chinese Academy of Sciences, Beijing 100101, China.

<sup>9</sup>School of Biomedical Sciences, Shandong First Medical University & Shandong Academy of Medical Sciences, Jinan 250117, China.

<sup>10</sup>Department of Computer Science and Engineering, The Chinese University of Hong Kong, Hong Kong 999077, China.

†These authors contributed equally.

\*Correspondence should be addressed to Z.S. (zsu@wchscu.cn), S.S. (siqisun@fudan.edu.cn), K.Z. (kzheng@scu.edu.cn), and L.L. (liul@im.ac.cn).

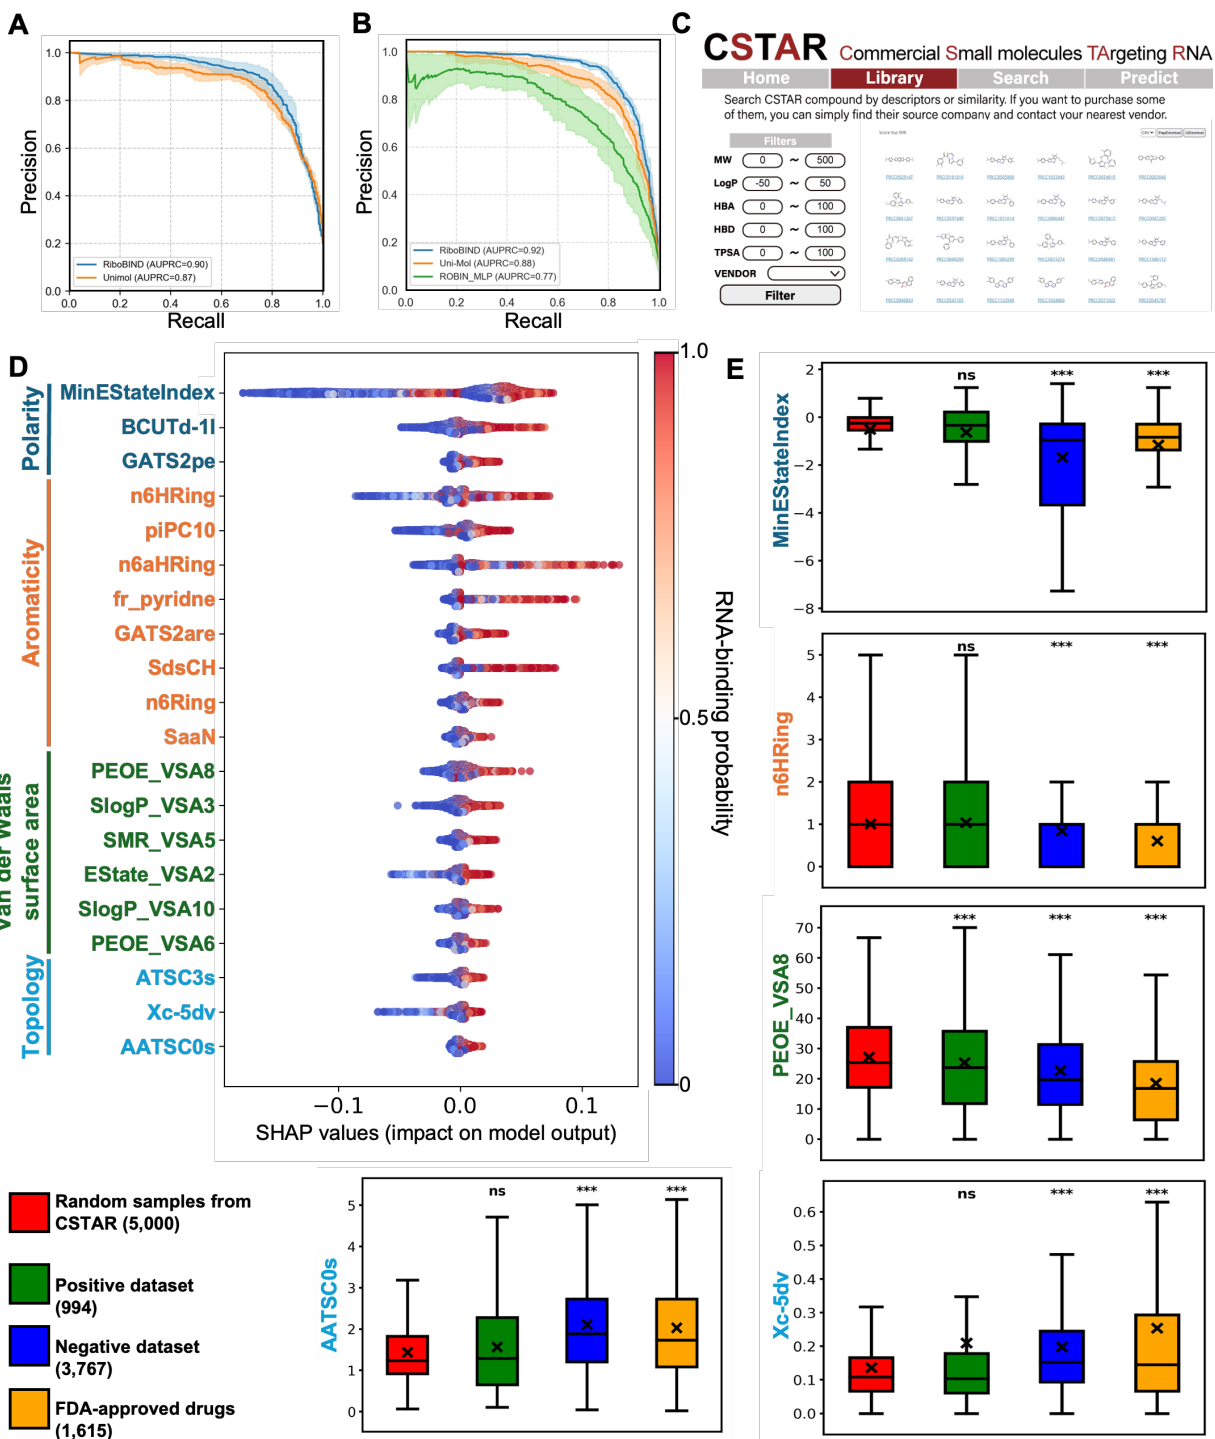

29  
 30 **Figure S1 | Curation of CSTAR library and analysis of RNA-binding propensities, related**  
 31 **to Fig. 1. A,** Comparison of AUPRC curves between RiboBIND and Uni-MOL on CSTAR  
 32 benchmark dataset. **B,** Comparison of AUPRC curves among RiboBIND, Uni-MOL and ROBIN  
 33 MLP model on ROBIN benchmark dataset. **C,** CSTAR website snapshot. **D,** Beeswarm plot  
 34 illustrating 20 most impactful descriptors to the SHAP model, most of which could explicitly  
 35 separate RNA-binding (red) from protein-binding (blue). The descriptors were divided into four

36 major category, including polarity, aromaticity, Van der Waals surface area and topology. E,  
37 Comparisons using box and whisker plots of five representative descriptors among four datasets,  
38 including 5,000 compounds randomly sampled from the CSTAR library (red), 994 compounds  
39 from the positive dataset (green), 3,767 compounds from the negative dataset (blue), and 1,615  
40 FDA-approved drugs (yellow). The whiskers represent 10-90% of data with outliers excluded,  
41 and the boxes contain the middle 50% of the data. The black lines and × signs denote the  
42 medians and means, respectively. Descriptors of MinEstateIndex (Minimum E-state value),  
43 n6HRing (Number of 6-membered heterorings), PEOE\_VSA8 (Van der Waals surface area with  
44 partial charges range from 0.20-0.25), Xc-5dv(5th-order valence connectivity index), and  
45 AATSC0s (Average E-state value for carbon atoms at zero topological distance) were selected.  
46 T-tests were performed between the CSTAR representatives and three other datasets. ns,  $P > 0.05$ ;  
47 \*,  $P \leq 0.05$ ; \*\*,  $P \leq 0.01$ ; \*\*\*,  $P \leq 0.001$ .  
48

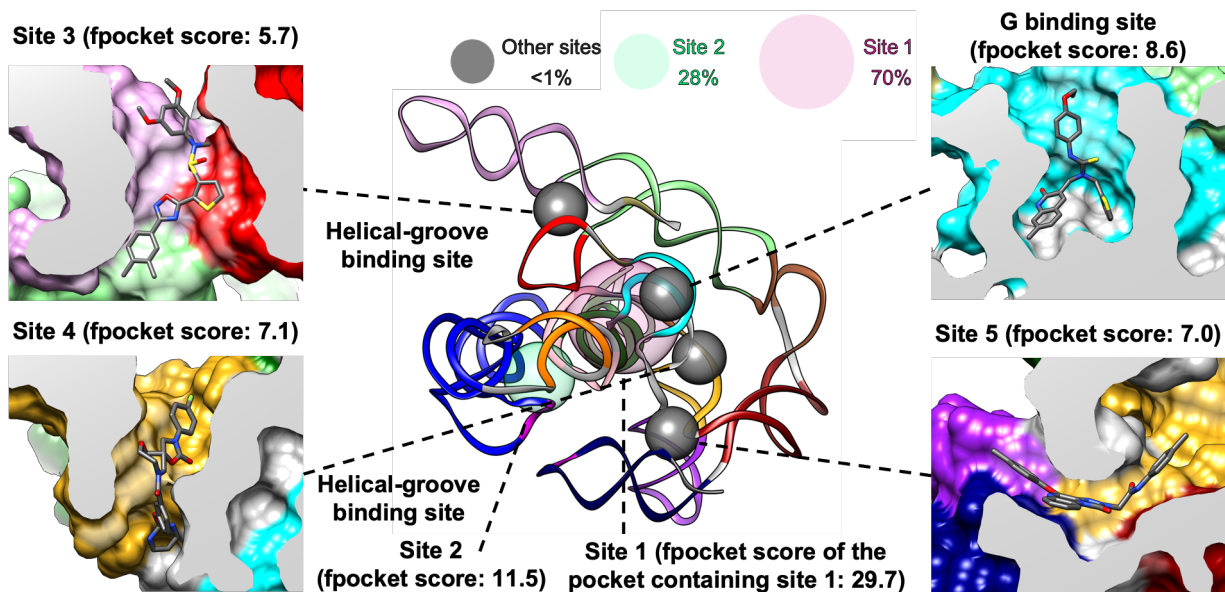

49  
 50 **Figure S2 | The remaining binding sites identified from molecular docking of 8,392**  
 51 **diversified CSTAR compounds, related to Fig. 2.** The two major sites 1 (transparent violet  
 52 red) and 2 (transparent spring green) contained ~98% of the docked small molecules with scores  
 53 of -50 and lower, and the pocket scores were 29.7 for site 1 (a pocket ~2.5 times larger in volume  
 54 than site 2) and 11.5 for site 2, as determined by fpocket. The remaining site 3, 4, 5 and G-  
 55 binding site were shown in grey, with pocket scores of 5.7, 7.1, 7.0 and 8.6, respectively.  
 56 Representative small molecules for each site were shown in the molecular surfaces colored  
 57 according to the model.  
 58

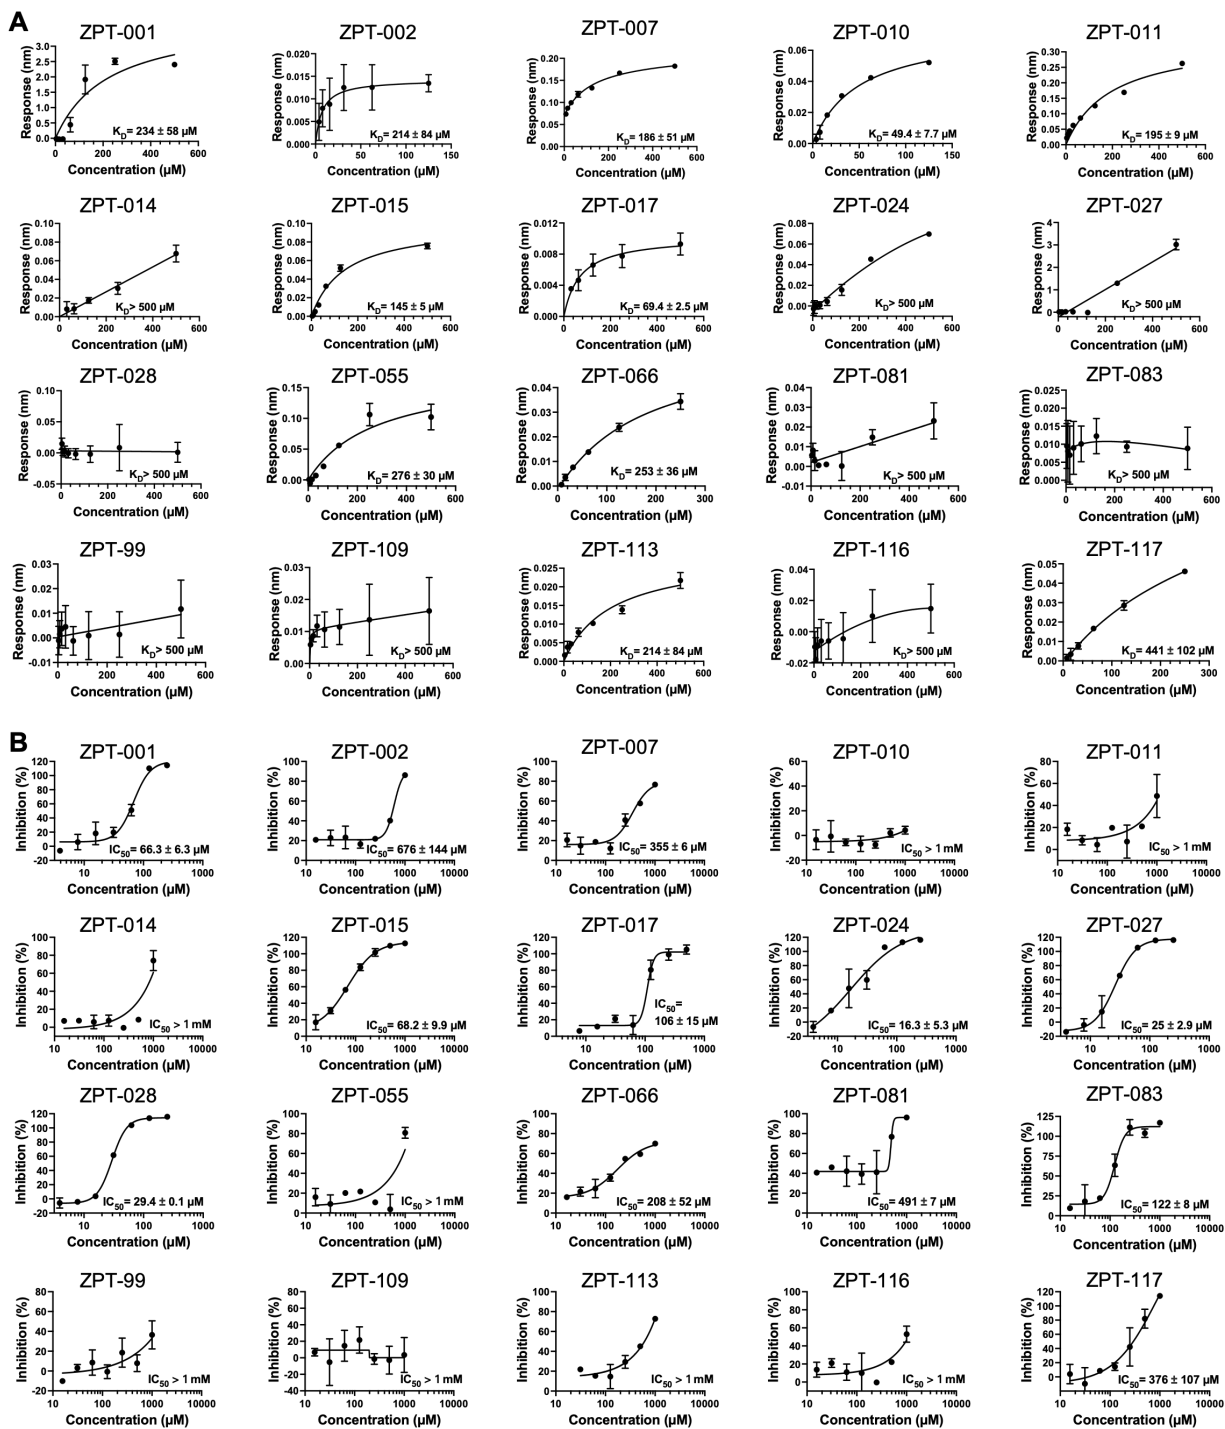

59  
60  
61  
62  
63  
64  
65

**Figure S3 | Binding affinity and inhibition activity curves of selected compounds, related to Fig. 3. A, Binding affinity curves for 20 compounds selected from preliminary screening. B, Dose-response curves for catalysis inhibition of 20 compounds selected from preliminary screening. All data were presented as mean values  $\pm$  standard deviation (SD) from two independent experiments.**

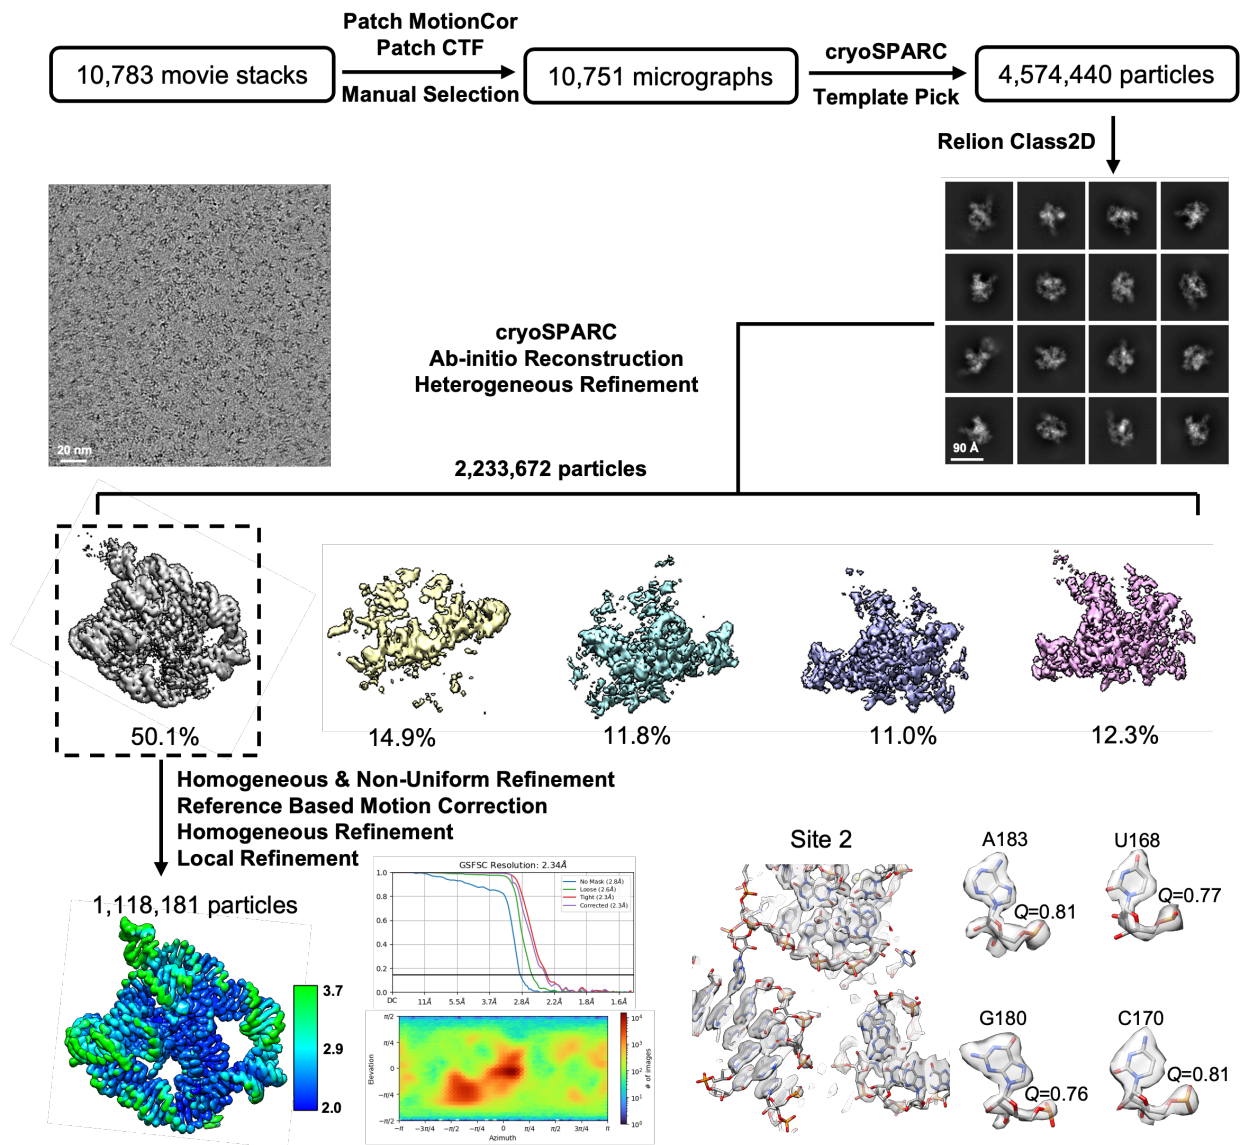

66  
67  
68  
69  
70  
71

**Figure S4 | Cryo-EM data processing of L-16 in complex with ZPT-005, related to Fig. 4.**  
The cryo-EM processing workflow including representative micrograph, 2D classification, 3D classification, 3D reconstruction, FSC curve and particle orientation distribution. Cryo-EM map and model surrounding site 2 were presented.

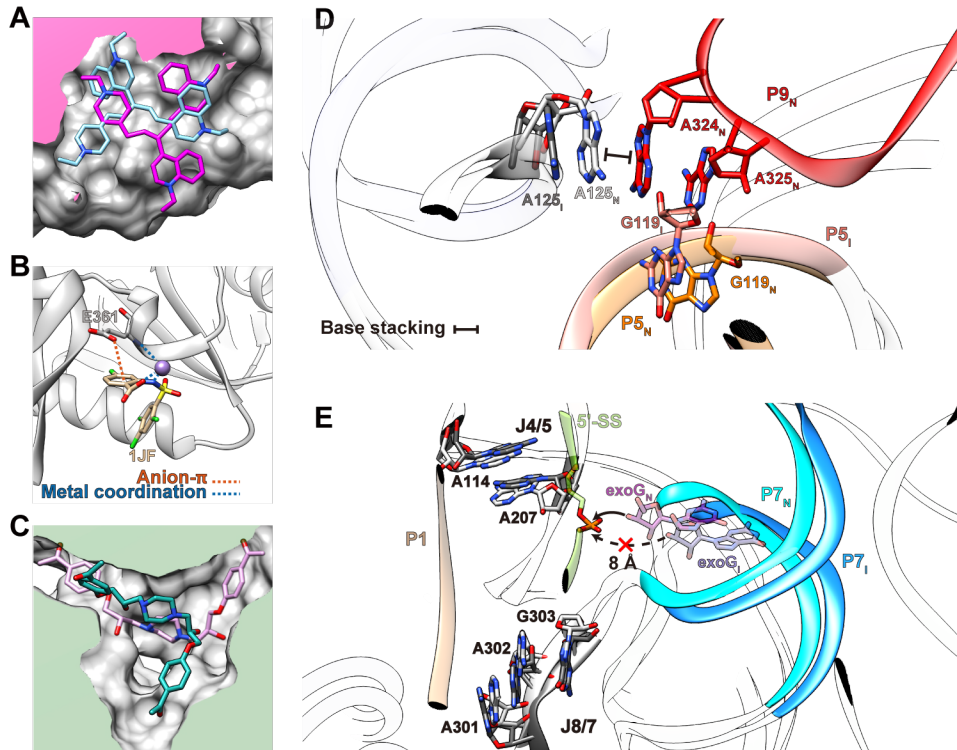

72  
 73 **Figure S5 ZPT-005 and ZPT-084 recognition patterns and MOAs, related to Fig. 4 and 5.**  
 74 **A,** Comparison of experimental (magenta) and docked (light blue) ZPT-005 conformations. **B,**  
 75 The anion- $\pi$  and metal coordination interactions previously reported in a HCV NS5B polymerase  
 76 inhibitor (PDB 4J04). **C,** Comparison of experimental (light sea green) and docked ZPT-084  
 77 (pink) conformations. **D,** Conformational change of P5 (orange) and J5/5a (grey) disrupted  
 78 hydrogen bonds and stacking of P5/L9 (red) tertiary interaction. **E,** Alignment of P1 docking  
 79 register residues (grey) between N and I conformations revealed translocation of G-binding site  
 80 and exoG 8 Å away from the 5'-SS to inhibit catalysis.  
 81

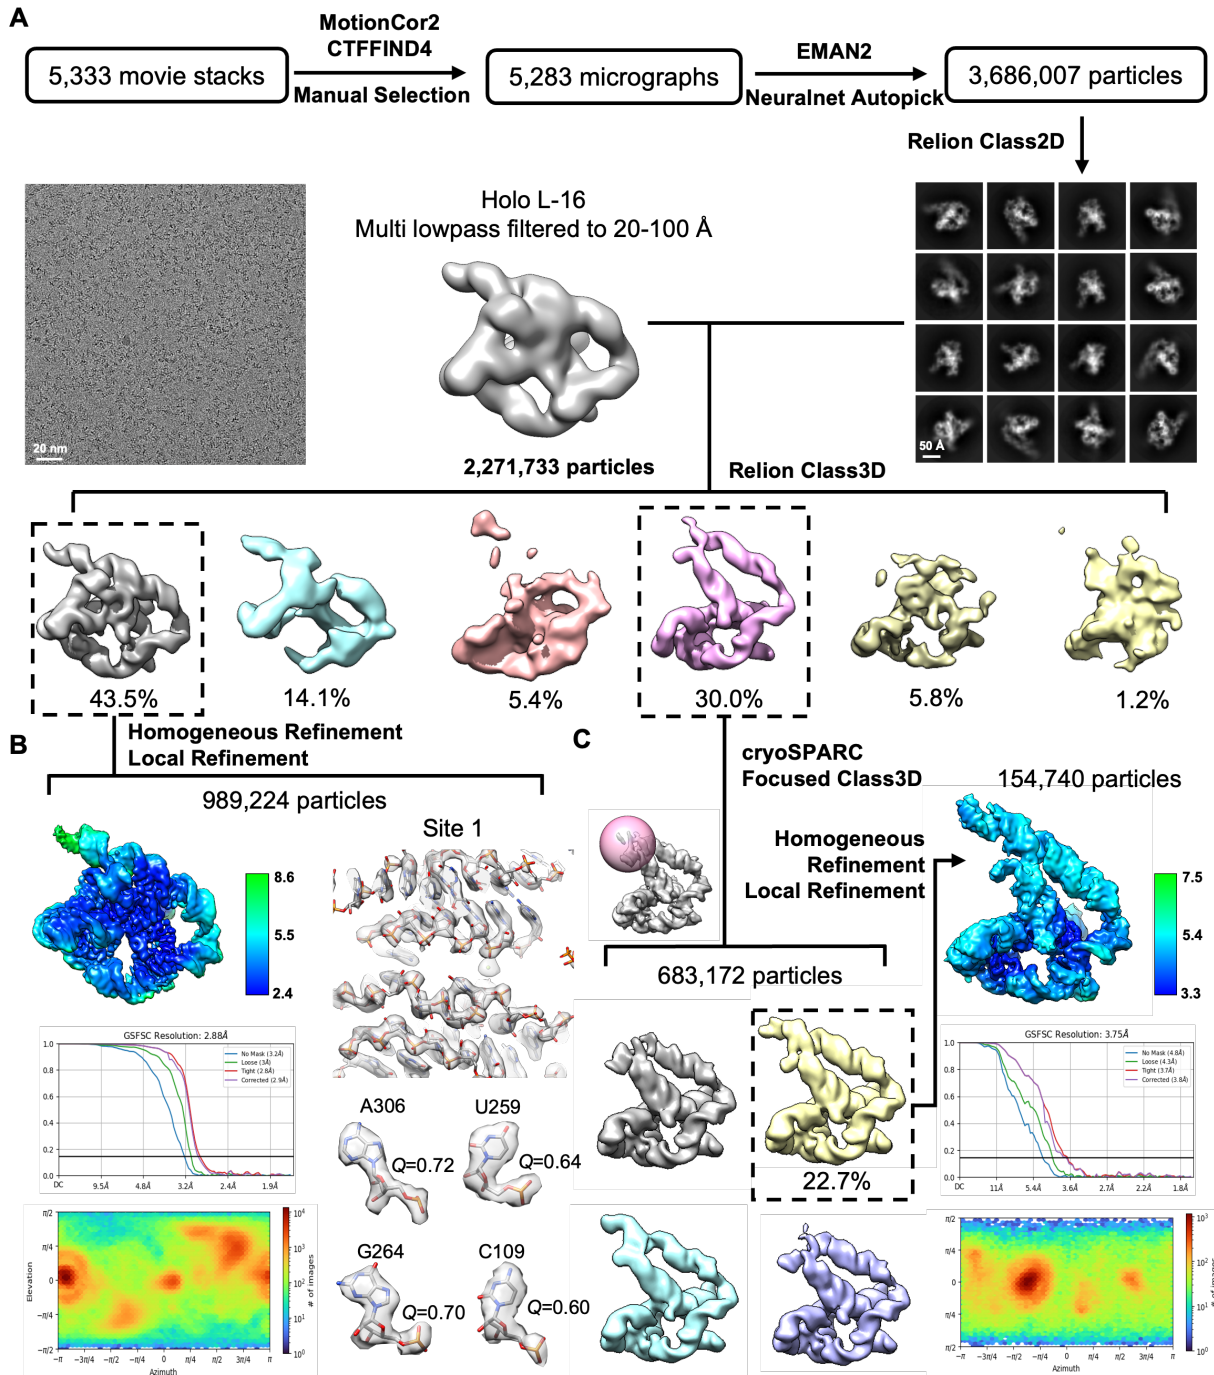

82  
 83 **Figure S6 | Cryo-EM data processing of L-16 in complex with ZPT-084, related to Fig. 5. A,**  
 84 **The cryo-EM processing workflow including representative micrograph, 2D classification and**  
 85 **3D classification, which revealed two different conformations. B, Reconstruction of the N**  
 86 **conformation at 2.9 Å resolution, with FSC curve and particle orientation distribution. Cryo-EM**  
 87 **map and model surrounding site 2 were presented. C, Focused classification on P9 and P9.2 of**  
 88 **the I conformation resulted a density map at 3.8 Å resolution, with FSC curve and particle**  
 89 **orientation distribution.**

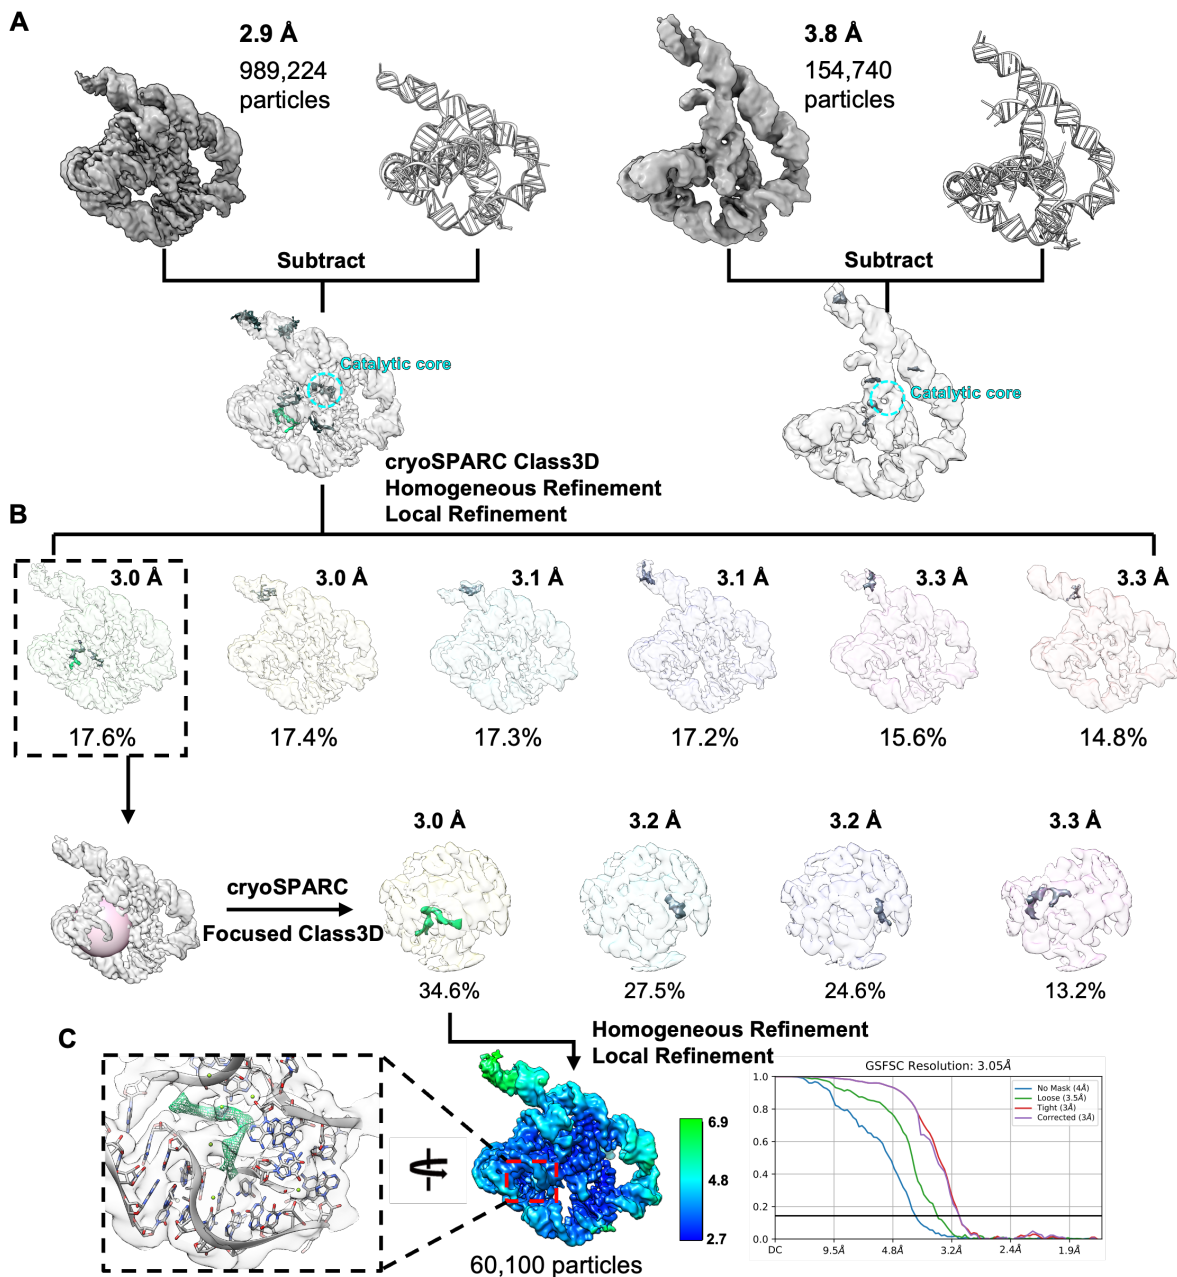

90  
91  
92  
93  
94  
95  
96  
97  
98  
99

**Figure S7 | 3D classification and reconstruction yielded the cryo-EM structure with ZPT-084 density, related to Fig. 5. A,** Subtraction of the apo native L-16 model from the ZPT-084 native L-16 density resulted in additional densities in the core region and P9.2 (colored in grey and spring green). Whereas no additional densities were observed in the L-16 I conformation. **B,** 3D classification in cryoSPARC yielded a major class with extra densities in the core regions, whereas the remaining classes contained extra densities in P9.2. Focused 3D classification resulted in a major class with continuous extra density in site 2. **C,** Subsequent refinement yielded the final reconstruction with ZPT-084 density at 3.0 Å resolution.

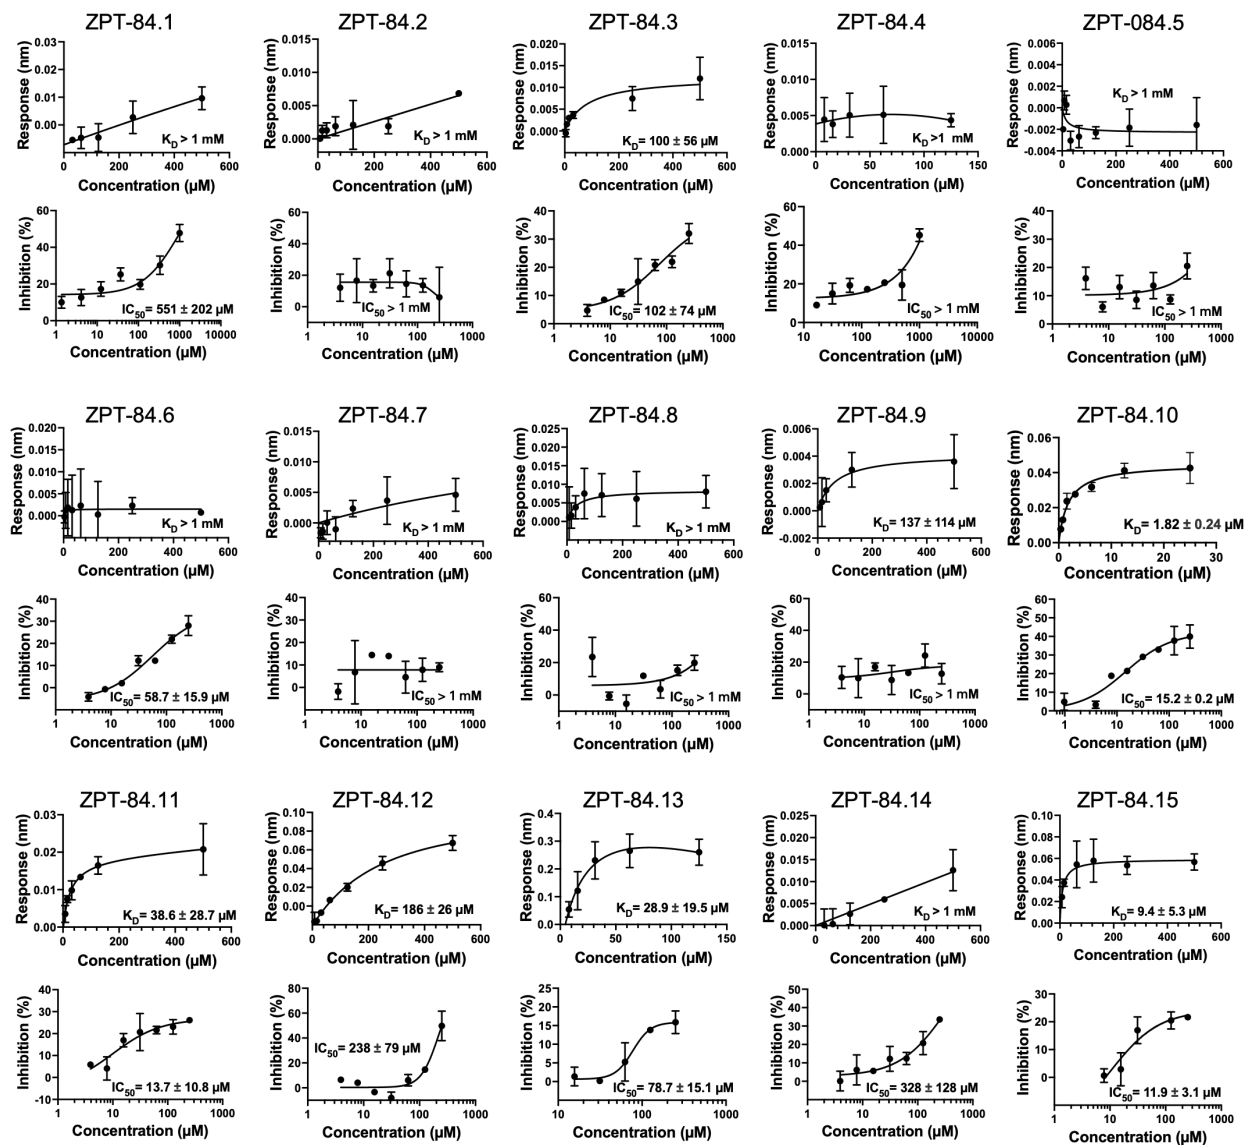

100  
101  
102

**Figure S8| Binding affinity and inhibition activity curves of ZPT-084 optimized compounds, related to Fig. 6. All data were presented as mean values  $\pm$  standard deviation (SD)**

103 from two independent experiments.

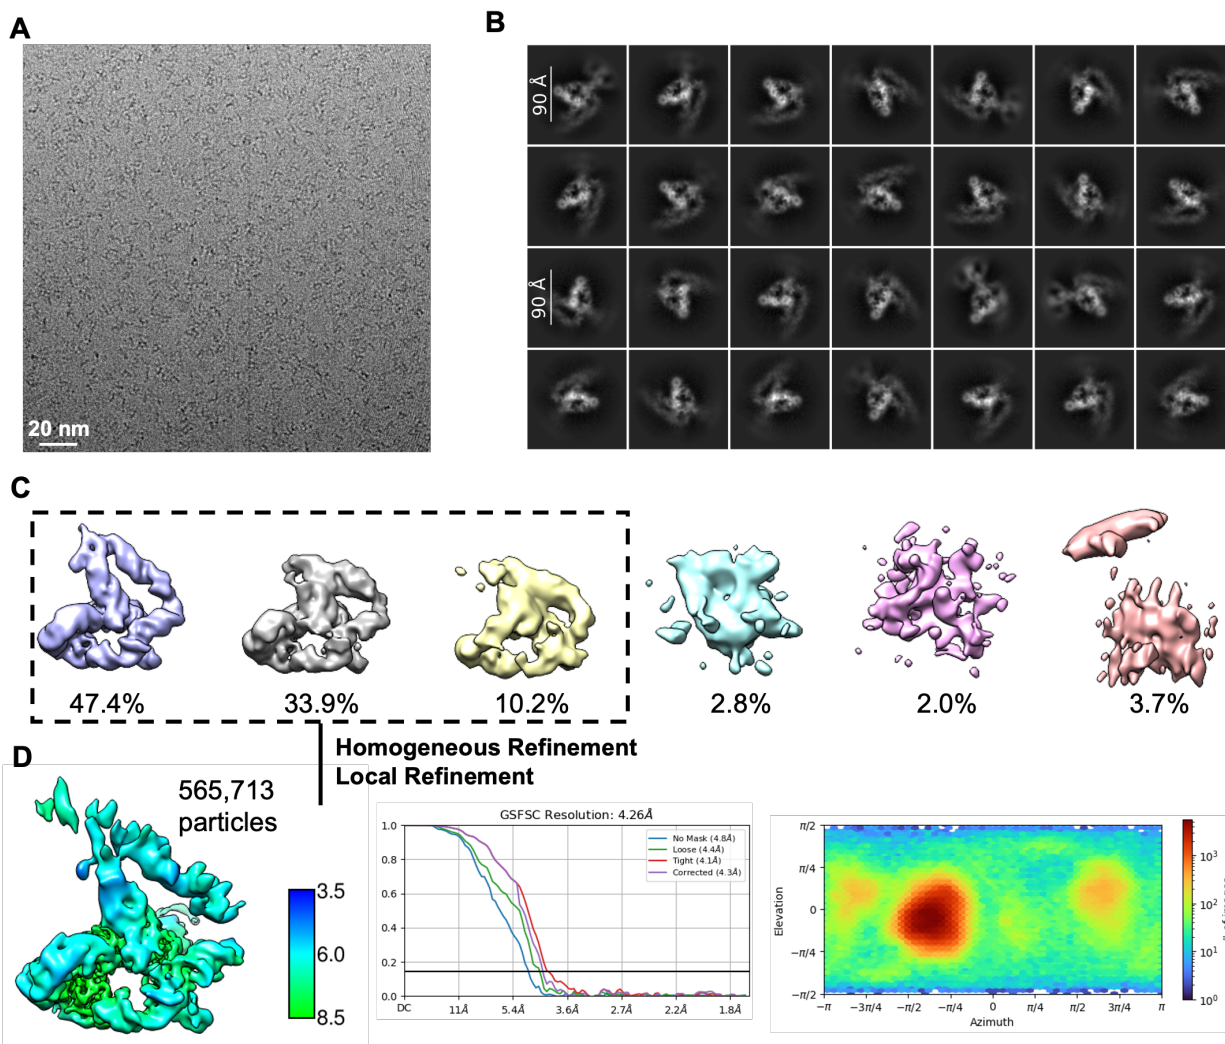

104  
105 **Figure S9 | Cryo-EM data processing of L-16 in complex with ZPT-084.10, related to Fig. 6.**  
106 **A**, Representative cryo-EM micrograph of L-16 in complex with ZPT-084.10. **B**, Representative  
107 2D class averages showing predominant L-16 in I conformation. **C**, 3D classification showing  
108 predominant population of L-16 in I conformation. **D**, Reconstruction of the L-16 I conformation  
109 at 4.3 Å resolution, with FSC curve and particle orientation distribution.  
110

111 **Table S1.** Cryo-EM data collection, processing, and model refinement statistics.

| Cryo-EM data collection and processing              | L-16-ZPT-005 (9UTI) | L-16-ZPT-084    |                |
|-----------------------------------------------------|---------------------|-----------------|----------------|
|                                                     |                     | N state (9J9X)  | I state (9JC8) |
| Microscope                                          | Titan Krios G4      | Titan Krios G3i |                |
| Voltage (kV)                                        | 300                 |                 |                |
| GIF Quantum energy filter slit width (eV)           | 10                  | 20              |                |
| Detector                                            | Falcon 4i           | Gatan K2        |                |
| Nominal Magnification                               |                     |                 |                |
| Pixel size (Å)                                      | 0.74                | 0.85            |                |
| Symmetry imposed                                    |                     |                 |                |
| Defocus range (µm)                                  | -0.7 to -1.1        | -1.2 to -2.0    |                |
| Electron exposure (e <sup>-</sup> /Å <sup>2</sup> ) | 48                  | 60              |                |
| Micrographs (acquired/used)                         | 10,783/10,751       | 5,333/5,283     |                |
| Number of extracted particles                       | 4,574,440           | 3,686,007       |                |
| Number of particles after 2D classifications        | 2,233,672           | 2,271,733       |                |
| Number of particles going to 3D refinement          | 1,118,181           | 60,100          | 154,740        |
| Map resolution at 0.143 FSC criterion (Å)           | 2.3                 | 3.0             | 3.8            |
| Local resolution range (Å)                          | 2.0-4.0             | 2.7-6.9         | 3.3-7.5        |
| Sharpening B-factor (Å <sup>2</sup> )               | -91                 | -90             | -200           |
| <b>Model refinement</b>                             |                     |                 |                |
| Atoms                                               | 8,705               | 8,235           | 8,202          |
| Residues                                            | 382                 | 382             | 382            |
| CC <sub>mask</sub>                                  | 0.72                | 0.73            | 0.67           |
| Resolution <sub>FSC map vs. model @ 0.5</sub> (Å)   | 2.7                 | 3.3             | 3.8            |
| Root mean square deviation                          |                     |                 |                |
| Bond lengths (Å)                                    | 0.003               | 0.003           | 0.003          |
| Bond angles (°)                                     | 0.747               | 0.689           | 0.814          |
| <b>Validation</b>                                   |                     |                 |                |
| Clash score                                         | 2.0                 | 2.5             | 4.4            |
| MolProbity score                                    | 1.8                 | 2.2             | 2.4            |

112

113 **Table S2.** Metal ions identified in the cryo-EM structures of L-16 in complex with ZPT-005, in  
 114 addition to those previously reported in previous studies.

| Metal           | Region               | Coordinate                                                    | Metal           | Region               | Coordinate                              |
|-----------------|----------------------|---------------------------------------------------------------|-----------------|----------------------|-----------------------------------------|
| M <sub>4</sub>  | P5a A-rich bulge     | 2H <sub>2</sub> O-A184 OP1-<br>A186 OP1-A187 OP2-<br>G188 OP2 | M <sub>64</sub> | J8/7                 | H <sub>2</sub> O-U300 OP2               |
| M <sub>5</sub>  | P5a A-rich bulge     | 3H <sub>2</sub> O-A183 OP1-<br>A184 OP2-A186 OP2              | M <sub>65</sub> | J8/7                 | A304 OP2                                |
| M <sub>6</sub>  | P5a A-rich bulge     | 5H <sub>2</sub> O-G188 O6                                     | M <sub>66</sub> | J8/7                 | A304 OP2-U305 O2'                       |
| M <sub>11</sub> | Between P3 and P6    | 4H <sub>2</sub> O-A256 OP1-<br>U273 OP1                       | M <sub>67</sub> | P3 major groove      | G96 N7                                  |
| M <sub>16</sub> | Between P6 and J6a/6 | 5H <sub>2</sub> O-U258 OP1                                    | M <sub>68</sub> | J8/7                 | H <sub>2</sub> O-G303 OP1               |
| M <sub>19</sub> | J8/7                 | 4H <sub>2</sub> O-A301 OP2-<br>A302 OP1                       | M <sub>69</sub> | Between P3 and P6a   | H <sub>2</sub> O-A256 N6-U273<br>OP2    |
| M <sub>26</sub> | Between P4 and J8/7  | 3H <sub>2</sub> O-C208 OP1-<br>A304 OP1-A306 OP2              | M <sub>70</sub> | P4 major groove      | G112 N7                                 |
| M <sub>35</sub> | P5b major groove     | A140 O2'                                                      | M <sub>71</sub> | J3/4                 | A105 OP1-U106 OP2                       |
| M <sub>36</sub> | P5a major groove     | A183 O2'-G188 OP1                                             | M <sub>72</sub> | P8 major groove      | C298 OP2-A299 OP2                       |
| M <sub>37</sub> | Between P4 and P5b   | A214 O3'-G215 OP1-<br>A140 O2'                                | M <sub>73</sub> | P5a major groove     | A136 O2'-A136 N3                        |
| M <sub>38</sub> | Between P4 and P5a   | U185 OP1-C213 O2'                                             | M <sub>74</sub> | P3 major groove      | H <sub>2</sub> O-C274 OP2               |
| M <sub>39</sub> | P5a major groove     | U185 OP2-U185 O2'                                             | M <sub>75</sub> | P8 major groove      | H <sub>2</sub> O-A299 N7                |
| M <sub>40</sub> | P5a major groove     | A187 O2'-G188 OP1                                             | M <sub>76</sub> | P8 major groove      | A299 O2'                                |
| M <sub>41</sub> | P4 major groove      | C211 OP1                                                      | M <sub>77</sub> | Between J3/4 and P7  | 2H <sub>2</sub> O-A104 OP2-<br>U267 OP2 |
| M <sub>42</sub> | P4 major groove      | H <sub>2</sub> O-C213 OP2                                     | M <sub>78</sub> | P2 major groove      | A46 OP2                                 |
| M <sub>43</sub> | P4 major groove      | A214 OP2                                                      | M <sub>79</sub> | Between P7 and P9a   | A314 OP1-C316 N4                        |
| M <sub>44</sub> | P6a major groove     | G254 OP1-C255 OP2                                             | M <sub>80</sub> | P9 major groove      | G328 OP2                                |
| M <sub>45</sub> | P6a major groove     | 2H <sub>2</sub> O-C255 O2'-G257<br>OP2                        | M <sub>81</sub> | P6 major groove      | A248 OP2                                |
| M <sub>46</sub> | P6a major groove     | C255 OP1                                                      | M <sub>82</sub> | P4 major groove      | G111 OP1-G112 OP2                       |
| M <sub>47</sub> | P5c major groove     | H <sub>2</sub> O-G164 OP1                                     | M <sub>83</sub> | P2 major groove      | U36 O2 U36 O2'                          |
| M <sub>48</sub> | P5c major groove     | H <sub>2</sub> O-C165 OP2-U167<br>O2'                         | M <sub>84</sub> | P7 major groove      | A265 OP2-C266 OP2                       |
| M <sub>49</sub> | Between P5a and P5b  | G164 N7-G180 N2                                               | M <sub>85</sub> | Between P7 and P9.1a | U310 O2'-G341 O2'                       |
| M <sub>50</sub> | P5a major groove     | H <sub>2</sub> O-C138 O2'-A178<br>N1                          | M <sub>86</sub> | P7 major groove      | H <sub>2</sub> O-A308 N7                |

|                 |                       |                                    |                 |                   |                                   |
|-----------------|-----------------------|------------------------------------|-----------------|-------------------|-----------------------------------|
| M <sub>51</sub> | P5 major groove       | U205 OP2-A206 N7                   | M <sub>87</sub> | P14 major groove  | C170 OP2-A171 N6                  |
| M <sub>52</sub> | P5 major groove       | 207 OP1                            | M <sub>88</sub> | Between P3 and P7 | A103 O2'-A269 N7                  |
| M <sub>53</sub> | Between J3/4 and P4   | H <sub>2</sub> O-U106 O2'-U107 OP2 | M <sub>89</sub> | P5a major groove  | U133 OP1                          |
| M <sub>54</sub> | Between P4 and J6/7   | H <sub>2</sub> O-G108 N7-U259 O2'  | M <sub>90</sub> | P2 major groove   | G32 N7-G32 OP2                    |
| M <sub>55</sub> | Between J6/7 and J8/7 | H <sub>2</sub> O-C260 OP1-U305 O4  | M <sub>91</sub> | P2 major groove   | U56 O4                            |
| M <sub>56</sub> | Between J6/7 and P7   | A261 OP1 G264 OP1                  | M <sub>92</sub> | P7 major groove   | A263 N3-G313 O2'                  |
| M <sub>57</sub> | Between P7 and J8/7   | C262 OP1-U305 O2'-A306 OP1         | M <sub>93</sub> | P6a major groove  | H2O-U224 O4                       |
| M <sub>58</sub> | Between P3 and P7     | H <sub>2</sub> O-U271 O4           | M <sub>94</sub> | P9 major groove   | U326 O4                           |
| M <sub>59</sub> | Between P3 and P7     | U271 OP2                           | M <sub>95</sub> | P3 major groove   | U277 O2-U277 O2'                  |
| M <sub>60</sub> | P3 major groove       | U101 O4-G272 O6                    | M <sub>96</sub> | J3/4              | A104 OP2-A105 OP2-A105 N7-U106 O4 |
| M <sub>61</sub> | P3 major groove       | H <sub>2</sub> O-C274 OP1-G275 OP2 | M <sub>97</sub> | J3/4              | A103 OP1                          |
| M <sub>62</sub> | P3 major groove       | G275 O2'                           | M <sub>98</sub> | P5b major groove  | U155 O2'                          |
| M <sub>63</sub> | Between P3 and J8/7   | A97 OP2-U300 O2'-A301 OP1          | M <sub>99</sub> | P5b major groove  | C154 OP2                          |

115  
116

117 **Table S3.** RNA and primer sequences in this study.

|                                    | Sequence                                                                                                                                                                                                                                                                                                                                                                                                                                   |
|------------------------------------|--------------------------------------------------------------------------------------------------------------------------------------------------------------------------------------------------------------------------------------------------------------------------------------------------------------------------------------------------------------------------------------------------------------------------------------------|
| L-16                               | 5'-UUUGGAGGGGAAAAGUUAUCAGGCAUGCACCUUGGUAGCUAGUCUUUAAACC<br>AAUAGAUUGCAUCGGUUUAAAAGGCAAGACCGUCAAAUUGCGGGAAAGGGGU<br>CAACAGCCGUUCAGUACCAAGUCUCAGGGGAAACUUUGAGAUGGCCUUGCAA<br>AGGGUAUGGUAAUAAGCUGACGGACAUGGUCCUAACCACGCAGCCAAGUCCU<br>AAGUCAACAGAUUCUUCUGUUGAUUAGGAUGCAGUUCACAGACUAAAUGUCGG<br>UCGGGAAGAUGUAUUCUUCUCAUAAGAUUAGUCGGACCUCUCCUAAAUGG<br>GAGCUAGCGGAUGAAGUGAUGCAACACUGGAGCCGCUGGGAACUAAUUUGUA<br>UGCGAAAGUAUUAUUGAUUAGUUUUGGAG-3' |
| L-16 preparation forward<br>primer | 5'-TAATACGACTCACTATAGGTTTGGAGGGAAAAGTTATCA-3'                                                                                                                                                                                                                                                                                                                                                                                              |
| L-16 preparation reverse<br>primer | 5'-/i2OMeC/i2OMeT/CCAAAATAATCAATATACTTT-3'                                                                                                                                                                                                                                                                                                                                                                                                 |

118

119

120 **Analytical Data of Compounds**

121 *Note: The unknown impurity: Around 3.3 ppm (water peak), 2.5 ppm (solvent peak) and 1.00 ppm*  
122 *-1.42 ppm in NMR are respectively from the DMSO and eluent.*

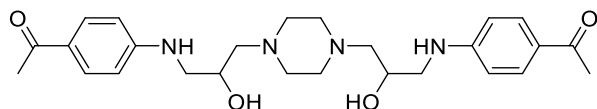

123

124 **1,1'-(((piperazine-1,4-diylbis(2-hydroxypropane-3,1-diyl))bis(azanediyl))bis(4,1-**  
125 **phenylene))bis(ethan-1-one) (ZPT-084.1)**

126 **<sup>1</sup>H NMR (400 MHz, DMSO)**  $\delta$  7.90 – 7.48 (m, 4H), 6.79 – 6.35 (m, 6H), 4.75 (d,  $J$  = 4.3 Hz,  
127 2H), 3.77 (s, 2H), 3.22 (dd,  $J$  = 11.5, 5.8 Hz, 2H), 3.11 – 2.93 (m, 2H), 2.62 – 2.05 (m, 18H).

128 **<sup>13</sup>C NMR (101 MHz, DMSO)**  $\delta$  195.37, 153.60, 130.89, 125.11, 111.22, 66.84, 62.79, 54.14,  
129 47.95, 26.33.

130 **HRMS (ESI)** calcd for C<sub>26</sub>H<sub>37</sub>N<sub>4</sub>O<sub>4</sub> (M+H)<sup>+</sup>: 469.2809, found: 469.2807.

131

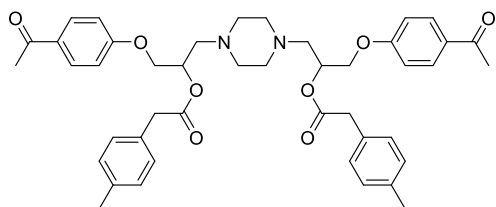

132

133 **piperazine-1,4-diylbis(3-(4-acetylphenoxy)propane-1,2-diyl) bis(2-(p-tolyl)acetate) (ZPT-**  
134 **084.2)**

135 **<sup>1</sup>H NMR (400 MHz, DMSO)**  $\delta$  7.89 (d,  $J$  = 8.8 Hz, 4H), 7.11 (d,  $J$  = 8.0 Hz, 4H), 7.04 (d,  $J$  =  
136 7.4 Hz, 4H), 6.98 (d,  $J$  = 8.8 Hz, 4H), 5.33 – 5.18 (m, 4H), 4.18 (ddd,  $J$  = 17.2, 11.0, 4.7 Hz,  
137 4H), 3.54 (d,  $J$  = 19.7 Hz, 4H), 2.56 – 2.42 (m, 12H), 2.32 – 2.26 (m, 6H), 2.22 (s,  $J$  = 5.8 Hz,  
138 6H).

139 **<sup>13</sup>C NMR (101 MHz, DMSO)**  $\delta$  196.75, 171.18, 162.51, 136.26, 131.68, 130.93, 130.62,  
140 129.73, 129.52, 129.30, 129.10, 114.85, 69.84, 68.45, 57.80, 53.59, 33.82, 32.19, 26.89, 25.79,  
141 24.93, 21.08.

142 **HRMS (ESI)** calcd for C<sub>44</sub>H<sub>51</sub>N<sub>2</sub>O<sub>8</sub> (M+H)<sup>+</sup>: 735.3640, found: 735.3657

143

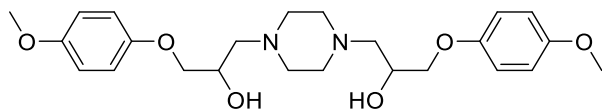

144

145 **3,3'-(piperazine-1,4-diyl)bis(1-(4-methoxyphenoxy)propan-2-ol) (ZPT-084.3)**

146 **<sup>1</sup>H NMR (400 MHz, DMSO)**  $\delta$  6.99 – 6.56 (m, 8H), 4.69 (d,  $J$  = 4.4 Hz, 2H), 3.78 (dd,  $J$  = 13.0,  
147 4.1 Hz, 4H), 3.72 – 3.65 (m, 2H), 3.58 (s, 6H), 2.45 – 2.38 (m, 2H), 2.33 – 2.19 (m, 10H).

148 **HRMS (ESI)** calcd for C<sub>26</sub>H<sub>37</sub>N<sub>4</sub>O<sub>4</sub> (M+H)<sup>+</sup>: 447.2495, found: 447.2498.

149

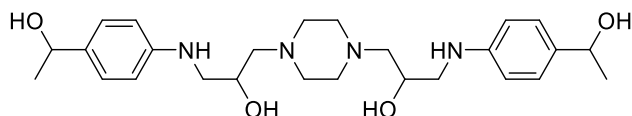

150

151 **3,3'-(piperazine-1,4-diyl)bis(1-((4-(1-hydroxyethyl)phenyl)amino)propan-2-ol) (ZPT-084.4)**

152  $^1\text{H NMR}$  (400 MHz, DMSO)  $\delta$  7.04 (d,  $J$  = 8.4 Hz, 4H), 6.54 (d,  $J$  = 8.5 Hz, 4H), 5.34 (dd,  $J$  =  
 153 12.6, 7.4 Hz, 2H), 4.99 – 4.70 (m, 2H), 3.94 – 3.68 (m, 2H), 3.64 – 3.33 (m, 2H), 3.11 (dd,  $J$  =  
 154 12.8, 4.7 Hz, 2H), 2.95 (ddd,  $J$  = 15.9, 13.7, 6.8 Hz, 2H), 2.62 – 2.26 (m, 4H), 1.27 (d,  $J$  = 6.4  
 155 Hz, 6H).

156  $^{13}\text{C NMR}$  (101 MHz, DMSO)  $\delta$  148.20, 135.00, 126.56, 112.16, 68.38, 66.64, 62.85, 53.78,  
 157 48.96, 45.92, 26.33.

158 **HRMS (ESI)** calcd for  $\text{C}_{26}\text{H}_{41}\text{N}_4\text{O}_4$  ( $\text{M}+\text{H}$ ) $^+$ : 473.3122, found: 473.3118.

159

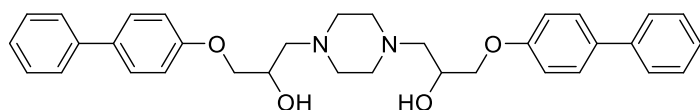

160

161 **3,3'-(piperazine-1,4-diyl)bis(1-([1,1'-biphenyl]-4-yloxy)propan-2-ol) (ZPT-084.5)**

162  $^1\text{H NMR}$  (400 MHz,  $\text{CDCl}_3$ )  $\delta$  7.59 – 7.49 (m, 8H), 7.42 (dd,  $J$  = 10.5, 4.8 Hz, 4H), 7.31 (t,  $J$  =  
 163 6.8 Hz, 2H), 7.08 – 6.96 (m, 4H), 4.14 (td,  $J$  = 9.2, 4.6 Hz, 2H), 4.11 – 3.99 (m, 4H), 3.06 (s,  
 164 2H), 2.98 – 2.19 (m, 12H).

165  $^{13}\text{C NMR}$  (101 MHz,  $\text{CDCl}_3$ )  $\delta$  158.28, 140.72, 134.13, 128.74, 128.17, 126.74, 114.85, 70.31,  
 166 65.59, 60.44.

167 **HRMS (ESI)** calcd for  $\text{C}_{26}\text{H}_{37}\text{N}_4\text{O}_4$  ( $\text{M}+\text{H}$ ) $^+$ : 539.2910, found: 539.2915.

168

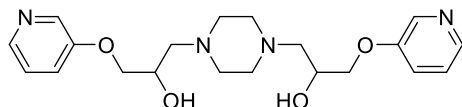

169

170 **3,3'-(piperazine-1,4-diyl)bis(1-(pyridin-3-yloxy)propan-2-ol) (ZPT-084.6)**

171  $^1\text{H NMR}$  (400 MHz, DMSO)  $\delta$  8.14 (d,  $J$  = 2.8 Hz, 2H), 8.01 (d,  $J$  = 4.5 Hz, 2H), 7.27 – 7.22  
 172 (m, 2H), 7.17 (dd,  $J$  = 8.4, 4.6 Hz, 2H), 4.80 (s, 2H), 3.91 (d,  $J$  = 6.5 Hz, 2H), 3.86 – 3.73 (m,  
 173 4H), 2.46 – 2.11 (m, 12H).

174 **HRMS (ESI)** calcd for  $\text{C}_{26}\text{H}_{37}\text{N}_4\text{O}_4$  ( $\text{M}+\text{H}$ ) $^+$ : 389.2189, found: 389.2193.

175

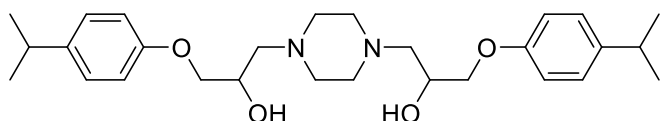

176

177 **3,3'-(piperazine-1,4-diyl)bis(1-(4-isopropylphenoxy)propan-2-ol) (ZPT-084.7)**

178  $^1\text{H NMR}$  (400 MHz, DMSO- $d_6$ )  $\delta$  7.10 (d,  $J$  = 8.1 Hz, 4H), 6.81 (d,  $J$  = 8.1 Hz, 4H), 4.91 – 4.45  
 179 (m, 2H), 3.89 (d,  $J$  = 8.0 Hz, 4H), 3.79 (d,  $J$  = 8.8 Hz, 2H), 2.79 (p,  $J$  = 7.0 Hz, 4H), 2.47-2.31  
 180 (m, 12H), 1.13 (d,  $J$  = 7.0 Hz, 12H).

181 **HRMS (ESI)** calcd for  $\text{C}_{26}\text{H}_{37}\text{N}_4\text{O}_4$  ( $\text{M}+\text{H}$ ) $^+$ : 471.3223, found: 471.3228.

182

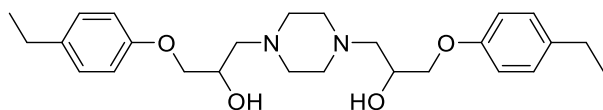

183

184 **3,3'-(piperazine-1,4-diyl)bis(1-(4-ethylphenoxy)propan-2-ol) (ZPT-084.8)**

185 <sup>1</sup>H NMR (400 MHz, DMSO) δ 7.10 (d, *J* = 8.5 Hz, 4H), 6.84 (d, *J* = 8.5 Hz, 4H), 4.81 (d, *J* =  
186 4.4 Hz, 2H), 3.99 – 3.90 (m, 4H), 3.81 (dd, *J* = 10.9, 7.3 Hz, 2H), 2.54 (d, *J* = 7.6 Hz, 2H), 2.51  
187 (dd, *J* = 4.3, 2.5 Hz, 4H), 2.44 – 2.31 (m, 10H), 1.14 (t, *J* = 7.6 Hz, 6H).

188 HRMS (ESI) calcd for C<sub>26</sub>H<sub>37</sub>N<sub>4</sub>O<sub>4</sub> (M+H)<sup>+</sup>: 442.2832, found: 442.2834.

189

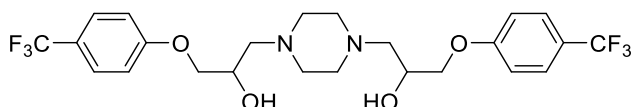

190

191 **3,3'-(piperazine-1,4-diyl)bis(1-(4-(trifluoromethyl)phenoxy)propan-2-ol) (ZPT-084.9)**

192 <sup>1</sup>H NMR (400 MHz, DMSO) δ 7.59 (d, *J* = 8.6 Hz, 4H), 7.08 (d, *J* = 8.6 Hz, 4H), 4.86 (d, *J* =  
193 2.3 Hz, 2H), 4.30 – 3.77 (m, 6H), 2.85 – 1.98 (m, 12H).

194 <sup>13</sup>C NMR (101 MHz, DMSO) δ 162.12, 127.35 (d, *J* = 4.04 Hz), 125.06 (d, *J* = 272.7 Hz),  
195 121.45 (d, *J* = 32.32 Hz), 121.01, 120.96, 120.54, 115.45, 71.90, 66.81, 61.36, 54.06.

196 <sup>19</sup>F NMR (376 MHz, DMSO) δ -59.77, -59.78, -59.80, -59.81, -60.48, -60.52, -60.57, -60.61, -  
197 60.66, -60.71.

198 HRMS (ESI) calcd for C<sub>24</sub>H<sub>29</sub>F<sub>6</sub>N<sub>2</sub>O<sub>4</sub> (M+H)<sup>+</sup>: 523.2026, found: 523.2024

199

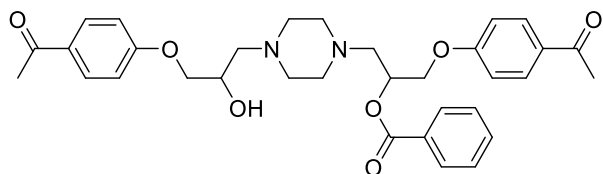

200

201 **1-(4-acetylphenoxy)-3-(4-(3-(4-acetylphenoxy)-2-hydroxypropyl)piperazin-1-yl)propan-2-yl**  
202 **benzoate (ZPT-084.10)**

203 <sup>1</sup>H NMR (400 MHz, DMSO) δ 8.13 – 7.81 (m, 6H), 7.68 – 7.51 (m, 3H), 7.20 – 6.93 (m, 4H),  
204 5.52 (d, *J* = 3.0 Hz, 1H), 4.39 (q, *J* = 11.2 Hz, 2H), 4.01 (dd, *J* = 36.0, 6.7 Hz, 3H), 2.92 – 2.26  
205 (m, 18H).

206 <sup>13</sup>C NMR (101 MHz, DMSO) δ 196.75, 165.70, 162.96, 162.60, 133.93, 130.96, 130.66,  
207 130.35, 130.13, 129.71, 129.24, 114.96, 114.80, 71.50, 70.52, 68.53, 57.68, 57.65, 26.88.

208 HRMS (ESI) calcd for C<sub>33</sub>H<sub>39</sub>N<sub>2</sub>O<sub>7</sub> (M+H)<sup>+</sup>: 575.2752, found: 575.2747.

209

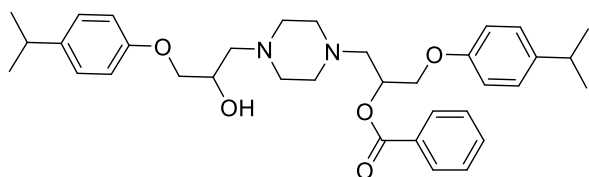

210

211 **1-(4-(2-hydroxy-3-(4-isopropylphenoxy)propyl)piperazin-1-yl)-3-(4-**  
212 **isopropylphenoxy)propan-2-yl benzoate (ZPT-084.11)**

213 <sup>1</sup>H NMR (400 MHz, CDCl<sub>3</sub>) δ 8.18 – 7.90 (m, 2H), 7.65 – 7.52 (m, 1H), 7.43 (dd, *J* = 10.6, 4.8  
214 Hz, 2H), 7.13 (d, *J* = 8.6 Hz, 4H), 6.91 – 6.80 (m, 4H), 5.70 – 5.31 (m, 1H), 4.33 – 3.85 (m, 6H),  
215 2.92 – 2.83 (m, 2H), 2.82 – 2.73 (m, 2H), 2.70 – 2.40 (m, 10H), 1.22 (d, *J* = 6.9 Hz, 12H).

216 <sup>13</sup>C NMR (101 MHz, CDCl<sub>3</sub>) δ 166.06, 156.80, 141.51, 141.39, 133.01, 130.24, 129.72, 128.35,  
217 127.27, 127.24, 114.58, 114.37, 70.82, 70.33, 67.92, 65.53, 60.50, 58.01, 53.76, 53.38, 49.15,  
218 33.98, 33.29, 25.64, 24.96, 24.21.

219 **HRMS (ESI)** calcd for C<sub>35</sub>H<sub>47</sub>N<sub>2</sub>O<sub>5</sub> (M+H)<sup>+</sup>: 575.3479, found: 575.3475

220

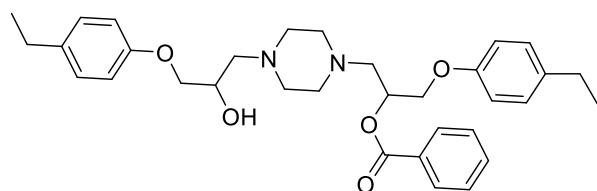

221

222 **1-(4-ethylphenoxy)-3-(4-(3-(4-ethylphenoxy)-2-hydroxypropyl)piperazin-1-yl)propan-2-yl**  
223 **benzoate (ZPT-084.12)**

224 <sup>1</sup>H NMR (400 MHz, DMSO-*d*<sub>6</sub>) δ 7.90 (d, *J* = 7.4 Hz, 2H), 7.61 (d, *J* = 7.3 Hz, 1H), 7.48 (t, *J* =  
225 7.6 Hz, 2H), 7.12 – 6.99 (m, 4H), 6.81 (dd, *J* = 16.4, 8.2 Hz, 4H), 5.43 (dd, *J* = 6.1, 3.8 Hz, 1H),  
226 4.74 (d, *J* = 4.4 Hz, 1H), 4.27 – 4.12 (m, 2H), 3.87 (d, *J* = 7.7 Hz, 2H), 3.80 – 3.71 (m, 1H), 2.65  
227 (d, *J* = 6.3 Hz, 2H), 2.54 – 2.45 (m, 4H), 2.43-2.24 (m, 10H), 1.09 (td, *J* = 7.5, 2.9 Hz, 6H).

228 **HRMS (ESI)** calcd for C<sub>26</sub>H<sub>37</sub>N<sub>4</sub>O<sub>4</sub> (M+H)<sup>+</sup>: 546.3094, found: 546.3096.

229

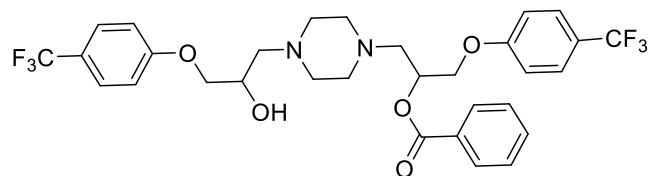

230

231 **1-(4-(2-hydroxy-3-(4-(trifluoromethyl)phenoxy)propyl)piperazin-1-yl)-3-(4-**  
232 **(trifluoromethyl)phenoxy)propan-2-yl benzoate (ZPT-084.13)**

233 <sup>1</sup>H NMR (400 MHz, DMSO) δ 7.90 (d, *J* = 7.2 Hz, 2H), 7.60 (d, *J* = 7.1 Hz, 5H), 7.48 (t, *J* =  
234 7.2 Hz, 2H), 7.10 (dd, *J* = 18.0, 8.1 Hz, 4H), 5.80 – 5.39 (m, 1H), 4.85 (s, 1H), 4.35 (s, 2H), 4.20  
235 – 3.81 (m, 3H), 2.68 – 2.67 (m, 2H), 2.47 – 2.32 (m, 10H).

236 <sup>13</sup>C NMR (101 MHz, DMSO) δ 165.66, 162.11, 161.66, 132.02(d, *J* = 285.83 Hz), 129.44 (d, *J* =  
237 47.47 Hz), 127.51, 127.48, 127.44, 127.41, 127.37, 127.33, 126.37, 126.34, 126.30, 123.71,  
238 123.63, 123.61, 123.58, 122.08, 122.03, 121.58, 121.27, 115.58 (d, *J* = 21.21 Hz), 71.88, 70.60,  
239 68.65, 66.79, 61.29, 57.92, 54.02, 53.76, 47.97, 33.82, 25.79, 24.92.

240 <sup>19</sup>F NMR (376 MHz, DMSO) δ -59.55, -59.78, -59.88, -60.27, -60.37, -60.49, -60.58, -60.70, -  
241 60.79.

242 **HRMS (ESI)** calcd for C<sub>31</sub>H<sub>33</sub>F<sub>6</sub>N<sub>2</sub>O<sub>5</sub> (M+H)<sup>+</sup>: 627.2288, found: 627.2286

243

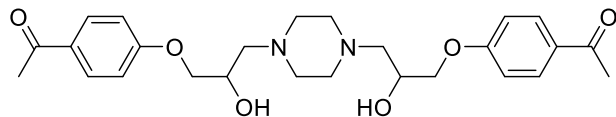

244

245 **1,1'-(((piperazine-1,4-diylbis(2-hydroxypropane-3,1-diyl))bis(oxy))bis(4,1-phenylene))bis(ethan-1-**  
246 **one) (ZPT-084.14)**

247 **<sup>1</sup>H NMR (400 MHz, DMSO)**  $\delta$  7.92 (d,  $J$  = 8.5 Hz, 4H), 7.04 (d,  $J$  = 8.5 Hz, 4H), 4.91 (d,  $J$  = 3.2 Hz,  
248 2H), 4.07 (t,  $J$  = 6.2 Hz, 2H), 3.95 (d,  $J$  = 7.3 Hz, 4H), 2.66 – 2.26 (m, 18H).

249 **HRMS (ESI)** calcd for C<sub>26</sub>H<sub>37</sub>N<sub>4</sub>O<sub>4</sub> (M+H)<sup>+</sup>: 471.2495, found: 471.2496.

250

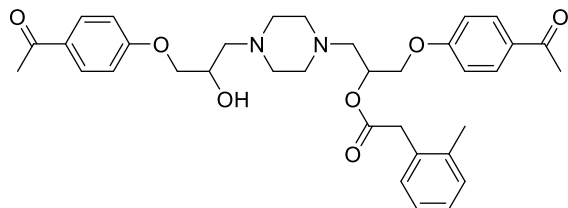

251

252 **1-(4-acetylphenoxy)-3-(4-(3-(4-acetylphenoxy)-2-hydroxypropyl)piperazin-1-yl)propan-2-yl 2-(o-**  
253 **tolyl)acetate (ZPT-084.15)**

254 **<sup>1</sup>H NMR (400 MHz, DMSO)**  $\delta$  8.10 – 7.80 (m, 6H), 7.66 – 7.48 (m, 3H), 7.26 – 6.88 (m, 3H),  
255 5.54 (d,  $J$  = 2.4 Hz, 1H), 4.35 (q,  $J$  = 9.6 Hz, 2H), 4.13 (m, 3H), 3.51 (d,  $J$  = 16.6 Hz, 2H), 2.92 –  
256 2.26 (m, 18H), 2.18 (s, 3H).

257 **HRMS (ESI)** calcd for C<sub>26</sub>H<sub>37</sub>N<sub>4</sub>O<sub>4</sub> (M+H)<sup>+</sup>: 602.2992, found: 602.2996.

258

259 **Supplementary Movie 1 | ZPT-084 binds to L-16 allesteric binding site to induce large**  
260 **conformational changes to translocate the catalytic site away from the 5'-SS to inhibit**  
261 **catalysis.**

262  
263 **Supplementary Data 1 | Information of compounds used in SHAP analysis, including**  
264 **10,000 randomly sampled from 13 million commercial library, 5,000 randomly sampled**  
265 **from the CSTAR library, 994 compounds from the positive dataset, 3,767 compounds from**  
266 **the negative dataset, and 1,615 FDA-approved drugs.**

267  
268 **Supplementary Data 2 | Information of 125 purchased compounds.**  
269
